# Supplementary material for: Not just a technique! An experimental approach to refine the definition of the bipolar anvil reduction in the Uluzzian
Source: Springer Nature journal article supplement (doi:10.1007/s12520-024-02097-z), 2024-11-28
Supplement: MOESM2 [file 12520_2024_2097_MOESM2_ESM.xlsx]

## Sheet: SI_2
Full experimental database with supporting information, shown in relation to the single obtained product (Excel sheet Products) or to the carried experiment (Excel sheet Experiments).
Data on anvils and hammerstones are also shown

## Sheet: Products
id	Experiment	Integrity	Fragment_Type	Lenght	Width	Lenght/Width	Thickness	Stage	Techno_Category	Quantity_Cortex	Position_Cortex	Section	Curvature_profile	Flake_Ending	Volume_Polyhedron	N_Exploited	Direction_Removals	Product_origin	Lab	N_Products	ID_code	Raw_Material	Initial_Height	Initial_Width	Initial_Thickness	Initial_Weight	Core_Lenght/Width	Core_Lenght/Thickness	Blank	Volumetry	Roundness	Alteration	Texture	N_Reduction_sequence	ID_reduction_sequences	N_Axes	Exploited_Axes	Reduction_Intensity	Gesture	Objective	Knapper	Hammerstone	Anvil	Hammer_Hardness	Hammer_Weight
0	Fe_Ex1	Integer	Integer	42	17	2.47059	9	Final	Core	51-75	Semi-total	Trapeze			flatparalelepiped	1	2-Bidirectional		Ferrara	6	Fe1	Chert	45	25	9	10.1	1.8	5	Retouched flake	Polyhedron	angular	no	fine-grained	1	Fe_Ex1	One	Long	1 - Low	Perpendicular	bladelet	Peresani	Hammer1	Anvil1_lab	Hard	513
1	Fe_Ex1	Integer	Integer	30	9	3.33333	7	Production	Spall	0		Rectangular triangle	Rectilinear	Hinged			1-Unidirectional	Anvil	Ferrara	6	Fe1	Chert	45	25	9	10.1	1.8	5	Retouched flake	Polyhedron	angular	no	fine-grained	1	Fe_Ex1	One	Long	1 - Low	Perpendicular	bladelet	Peresani	Hammer1	Anvil1_lab	Hard	513
2	Fe_Ex1	Integer	Integer	18	5	3.6	2	Production	Bladelet	0		Triangular	Twisted	Hinged			1-Unidirectional	Anvil	Ferrara	6	Fe1	Chert	45	25	9	10.1	1.8	5	Retouched flake	Polyhedron	angular	no	fine-grained	1	Fe_Ex1	One	Long	1 - Low	Perpendicular	bladelet	Peresani	Hammer1	Anvil1_lab	Hard	513
3	Fe_Ex1	Fragmented	Mesial	15	6	2.5	1	Production	Bladelet	0		Linear	Rectilinear	Broken			1-Unidirectional	Direct	Ferrara	6	Fe1	Chert	45	25	9	10.1	1.8	5	Retouched flake	Polyhedron	angular	no	fine-grained	1	Fe_Ex1	One	Long	1 - Low	Perpendicular	bladelet	Peresani	Hammer1	Anvil1_lab	Hard	513
4	Fe_Ex1	Fragmented	Meso-Distal	11	8	1.375	2	Production	Bladelet	0		Triangular	Rectilinear	Hinged			1-Unidirectional	Direct	Ferrara	6	Fe1	Chert	45	25	9	10.1	1.8	5	Retouched flake	Polyhedron	angular	no	fine-grained	1	Fe_Ex1	One	Long	1 - Low	Perpendicular	bladelet	Peresani	Hammer1	Anvil1_lab	Hard	513
5	Fe_Ex1	Fragmented	Distal	10	5	2	1	Production	Flake	0		Linear	Rectilinear	Hinged			1-Unidirectional		Ferrara	6	Fe1	Chert	45	25	9	10.1	1.8	5	Retouched flake	Polyhedron	angular	no	fine-grained	1	Fe_Ex1	One	Long	1 - Low	Perpendicular	bladelet	Peresani	Hammer1	Anvil1_lab	Hard	513
0	Fe_Ex2	Integer	Integer	35	32	1.09375	7	Final	Core	0		Rectangular Trapeze			flatparalelepiped	1	2-Bidirectional		Ferrara	13	Fe2	Chert	40	36	11	16.3	1.11111	3.63636	Flake	Polyhedron	angular	no	fine-grained	1	Fe_Ex2	One	Long	2 - Medium	Perpendicular	flake, bladelet	Peresani	Hammer1	Anvil1_lab	Hard	513
1	Fe_Ex2	Fragmented	Lateral	16	7	2.28571	3	Production	Flake	0		Rectangular triangle	Convex	Feather			2-Bidirectional	Anvil	Ferrara	13	Fe2	Chert	40	36	11	16.3	1.11111	3.63636	Flake	Polyhedron	angular	no	fine-grained	1	Fe_Ex2	One	Long	2 - Medium	Perpendicular	flake, bladelet	Peresani	Hammer1	Anvil1_lab	Hard	513
2	Fe_Ex2	Fragmented	Meso-Distal	17	4	4.25	3	Production	Spall	0		Triangular	Twisted	Feather			1-Unidirectional	Direct	Ferrara	13	Fe2	Chert	40	36	11	16.3	1.11111	3.63636	Flake	Polyhedron	angular	no	fine-grained	1	Fe_Ex2	One	Long	2 - Medium	Perpendicular	flake, bladelet	Peresani	Hammer1	Anvil1_lab	Hard	513
3	Fe_Ex2	Integer	Integer	16	4	4	3	Production	Bladelet	0		Rectangular triangle	Convex	Feather			2-Bidirectional	Direct	Ferrara	13	Fe2	Chert	40	36	11	16.3	1.11111	3.63636	Flake	Polyhedron	angular	no	fine-grained	1	Fe_Ex2	One	Long	2 - Medium	Perpendicular	flake, bladelet	Peresani	Hammer1	Anvil1_lab	Hard	513
4	Fe_Ex2	Integer	Integer	14	7	2	1	Production	Flake	0		Triangular	Rectilinear	Feather			1-Unidirectional	Direct	Ferrara	13	Fe2	Chert	40	36	11	16.3	1.11111	3.63636	Flake	Polyhedron	angular	no	fine-grained	1	Fe_Ex2	One	Long	2 - Medium	Perpendicular	flake, bladelet	Peresani	Hammer1	Anvil1_lab	Hard	513
5	Fe_Ex2	Fragmented	Meso-Proximal	13	8	1.625	3	Production	Flake	0		Linear	Rectilinear	Broken			1-Unidirectional	Direct	Ferrara	13	Fe2	Chert	40	36	11	16.3	1.11111	3.63636	Flake	Polyhedron	angular	no	fine-grained	1	Fe_Ex2	One	Long	2 - Medium	Perpendicular	flake, bladelet	Peresani	Hammer1	Anvil1_lab	Hard	513
6	Fe_Ex2	Fragmented	Mesial	12	18	0.666667	6	Production	Flake	0		Irregular		Broken			Indet		Ferrara	13	Fe2	Chert	40	36	11	16.3	1.11111	3.63636	Flake	Polyhedron	angular	no	fine-grained	1	Fe_Ex2	One	Long	2 - Medium	Perpendicular	flake, bladelet	Peresani	Hammer1	Anvil1_lab	Hard	513
7	Fe_Ex2	Fragmented	Proximal	21	18	1.16667	3	Production	Flake	0		Trapeze	Concave	Broken			2-Bidirectional	Anvil	Ferrara	13	Fe2	Chert	40	36	11	16.3	1.11111	3.63636	Flake	Polyhedron	angular	no	fine-grained	1	Fe_Ex2	One	Long	2 - Medium	Perpendicular	flake, bladelet	Peresani	Hammer1	Anvil1_lab	Hard	513
8	Fe_Ex2	Fragmented	Mesial	19	12	1.58333	4	Production	Flake	0		Trapeze	Rectilinear	Broken			2-Bidirectional	Anvil	Ferrara	13	Fe2	Chert	40	36	11	16.3	1.11111	3.63636	Flake	Polyhedron	angular	no	fine-grained	1	Fe_Ex2	One	Long	2 - Medium	Perpendicular	flake, bladelet	Peresani	Hammer1	Anvil1_lab	Hard	513
9	Fe_Ex2	Integer	Integer	12	9	1.33333	3	Production	Flake	0		Linear	Rectilinear	Feather			Indet		Ferrara	13	Fe2	Chert	40	36	11	16.3	1.11111	3.63636	Flake	Polyhedron	angular	no	fine-grained	1	Fe_Ex2	One	Long	2 - Medium	Perpendicular	flake, bladelet	Peresani	Hammer1	Anvil1_lab	Hard	513
10	Fe_Ex2	Integer	Integer	9	15	0.6	3	Production	Flake	0		Linear	Rectilinear	Hinged			Indet		Ferrara	13	Fe2	Chert	40	36	11	16.3	1.11111	3.63636	Flake	Polyhedron	angular	no	fine-grained	1	Fe_Ex2	One	Long	2 - Medium	Perpendicular	flake, bladelet	Peresani	Hammer1	Anvil1_lab	Hard	513
11	Fe_Ex2	Fragmented	Meso-Proximal	24	12	2	3	Production	Bladelet	0		Trapeze	Rectilinear	Broken			1-Unidirectional	Anvil	Ferrara	13	Fe2	Chert	40	36	11	16.3	1.11111	3.63636	Flake	Polyhedron	angular	no	fine-grained	1	Fe_Ex2	One	Long	2 - Medium	Perpendicular	flake, bladelet	Peresani	Hammer1	Anvil1_lab	Hard	513
12	Fe_Ex2	Fragmented	Meso-Distal	16	7	2.28571	1	Production	Bladelet	0		Linear	Rectilinear	Hinged			1-Unidirectional	Direct	Ferrara	13	Fe2	Chert	40	36	11	16.3	1.11111	3.63636	Flake	Polyhedron	angular	no	fine-grained	1	Fe_Ex2	One	Long	2 - Medium	Perpendicular	flake, bladelet	Peresani	Hammer1	Anvil1_lab	Hard	513
0	Fe_Ex3	Fragmented	Mesial	31	27	1.14815	12	Final	Core	1-25	Transversal	Trapeze		Broken	flatparalelepiped	2	1-Unidirectional		Ferrara	9	Fe3	Chert	58	30	13	24.2	1.93333	4.46154	Flake	Polyhedron	angular	no	fine-grained	1	Fe_Ex3	One	Short	1 - Low	Perpendicular	flake	Peresani	Hammer1	Anvil1_lab	Hard	513
1	Fe_Ex3	Integer	Integer	10	12	0.833333	1	Production	Flake	0		Linear	Rectilinear	Feather			1-Unidirectional	Direct	Ferrara	9	Fe3	Chert	58	30	13	24.2	1.93333	4.46154	Flake	Polyhedron	angular	no	fine-grained	1	Fe_Ex3	One	Short	1 - Low	Perpendicular	flake	Peresani	Hammer1	Anvil1_lab	Hard	513
2	Fe_Ex3	Integer	Integer	22	12	1.83333	4	Production	Flake	0		Irregular	Concave	Feather			5-Perpendicular		Ferrara	9	Fe3	Chert	58	30	13	24.2	1.93333	4.46154	Flake	Polyhedron	angular	no	fine-grained	1	Fe_Ex3	One	Short	1 - Low	Perpendicular	flake	Peresani	Hammer1	Anvil1_lab	Hard	513
3	Fe_Ex3	Integer	Integer	10	12	0.833333	1	Production	Flake	0		Linear	Rectilinear	Feather			5-Perpendicular		Ferrara	9	Fe3	Chert	58	30	13	24.2	1.93333	4.46154	Flake	Polyhedron	angular	no	fine-grained	1	Fe_Ex3	One	Short	1 - Low	Perpendicular	flake	Peresani	Hammer1	Anvil1_lab	Hard	513
4	Fe_Ex3	Fragmented	Proximal	9	11	0.818182	1	Production	Flake	0		Linear	Rectilinear	Broken			1-Unidirectional		Ferrara	9	Fe3	Chert	58	30	13	24.2	1.93333	4.46154	Flake	Polyhedron	angular	no	fine-grained	1	Fe_Ex3	One	Short	1 - Low	Perpendicular	flake	Peresani	Hammer1	Anvil1_lab	Hard	513
5	Fe_Ex3	Integer	Integer	11	8	1.375	4	Production	Flake	0		Triangular	Convex	Feather			Indet		Ferrara	9	Fe3	Chert	58	30	13	24.2	1.93333	4.46154	Flake	Polyhedron	angular	no	fine-grained	1	Fe_Ex3	One	Short	1 - Low	Perpendicular	flake	Peresani	Hammer1	Anvil1_lab	Hard	513
6	Fe_Ex3	Fragmented	Proximal	21	11	1.90909	6	Final	Flake	0		Trapeze		Broken			2-Bidirectional		Ferrara	9	Fe3	Chert	58	30	13	24.2	1.93333	4.46154	Flake	Polyhedron	angular	no	fine-grained	1	Fe_Ex3	One	Short	1 - Low	Perpendicular	flake	Peresani	Hammer1	Anvil1_lab	Hard	513
7	Fe_Ex3	Fragmented	Mesial	24	7	3.42857	13	Final	Spall	1-25	Mesial	Rectangular Trapeze		Broken			Indet		Ferrara	9	Fe3	Chert	58	30	13	24.2	1.93333	4.46154	Flake	Polyhedron	angular	no	fine-grained	1	Fe_Ex3	One	Short	1 - Low	Perpendicular	flake	Peresani	Hammer1	Anvil1_lab	Hard	513
8	Fe_Ex3	Fragmented	Distal	30	19	1.57895	11	Final	Flake	51-75	Semi-total	Trapeze		Broken			2-Bidirectional		Ferrara	9	Fe3	Chert	58	30	13	24.2	1.93333	4.46154	Flake	Polyhedron	angular	no	fine-grained	1	Fe_Ex3	One	Short	1 - Low	Perpendicular	flake	Peresani	Hammer1	Anvil1_lab	Hard	513
0	Fe_Ex4	Integer	Integer	37	32	1.15625	11	Final	Core	0		Trapeze			flatparalelepiped	1	2-Bidirectional		Ferrara	11	Fe4	Chert	37	37	13	21.9	1	2.84615	Retouched flake	Polyhedron	angular	no	fine-grained	1	Fe_Ex4	One	Same length	2 - Medium	Perpendicular	bladelet	Peresani	Hammer1	Anvil1_lab	Hard	513
1	Fe_Ex4	Integer	Integer	35	10	3.5	5	Production	Spall	1-25	Distal	Rectangular triangle	Concave	Plunging			Indet	Anvil	Ferrara	11	Fe4	Chert	37	37	13	21.9	1	2.84615	Retouched flake	Polyhedron	angular	no	fine-grained	1	Fe_Ex4	One	Same length	2 - Medium	Perpendicular	bladelet	Peresani	Hammer1	Anvil1_lab	Hard	513
2	Fe_Ex4	Integer	Integer	32	10	3.2	4	Production	Spall	1-25	Proximal	Trapeze	Rectilinear	Feather			5-Perpendicular	Anvil	Ferrara	11	Fe4	Chert	37	37	13	21.9	1	2.84615	Retouched flake	Polyhedron	angular	no	fine-grained	1	Fe_Ex4	One	Same length	2 - Medium	Perpendicular	bladelet	Peresani	Hammer1	Anvil1_lab	Hard	513
3	Fe_Ex4	Integer	Integer	12	3	4	1	Production	Bladelet	0		Triangular	Rectilinear	Feather			Indet		Ferrara	11	Fe4	Chert	37	37	13	21.9	1	2.84615	Retouched flake	Polyhedron	angular	no	fine-grained	1	Fe_Ex4	One	Same length	2 - Medium	Perpendicular	bladelet	Peresani	Hammer1	Anvil1_lab	Hard	513
4	Fe_Ex4	Integer	Integer	27	8	3.375	3	Production	Bladelet	26-50	Lateral	Triangular	Concave	Feather			Indet	Anvil	Ferrara	11	Fe4	Chert	37	37	13	21.9	1	2.84615	Retouched flake	Polyhedron	angular	no	fine-grained	1	Fe_Ex4	One	Same length	2 - Medium	Perpendicular	bladelet	Peresani	Hammer1	Anvil1_lab	Hard	513
5	Fe_Ex4	Integer	Integer	24	13	1.84615	3	Production	Blade	1-25	Lateral	Linear	Concave	Hinged			2-Bidirectional	Direct	Ferrara	11	Fe4	Chert	37	37	13	21.9	1	2.84615	Retouched flake	Polyhedron	angular	no	fine-grained	1	Fe_Ex4	One	Same length	2 - Medium	Perpendicular	bladelet	Peresani	Hammer1	Anvil1_lab	Hard	513
6	Fe_Ex4	Fragmented	Lateral	15	5	3	3	Production	Bladelet	0		Triangular	Rectilinear	Feather			1-Unidirectional		Ferrara	11	Fe4	Chert	37	37	13	21.9	1	2.84615	Retouched flake	Polyhedron	angular	no	fine-grained	1	Fe_Ex4	One	Same length	2 - Medium	Perpendicular	bladelet	Peresani	Hammer1	Anvil1_lab	Hard	513
7	Fe_Ex4	Fragmented	Meso-Proximal	15	5	3	2	Production	Bladelet	76-99	Semi-total	Triangular	Twisted	Broken			Indet	Anvil	Ferrara	11	Fe4	Chert	37	37	13	21.9	1	2.84615	Retouched flake	Polyhedron	angular	no	fine-grained	1	Fe_Ex4	One	Same length	2 - Medium	Perpendicular	bladelet	Peresani	Hammer1	Anvil1_lab	Hard	513
8	Fe_Ex4	Fragmented	Meso-Distal	14	8	1.75	2	Production	Backed flake	0		Trapeze	Wavy	Broken			2-Bidirectional	Anvil	Ferrara	11	Fe4	Chert	37	37	13	21.9	1	2.84615	Retouched flake	Polyhedron	angular	no	fine-grained	1	Fe_Ex4	One	Same length	2 - Medium	Perpendicular	bladelet	Peresani	Hammer1	Anvil1_lab	Hard	513
9	Fe_Ex4	Fragmented	Distal	10	4	2.5	2	Production	Bladelet	0		Triangular	Rectilinear	Hinged			1-Unidirectional		Ferrara	11	Fe4	Chert	37	37	13	21.9	1	2.84615	Retouched flake	Polyhedron	angular	no	fine-grained	1	Fe_Ex4	One	Same length	2 - Medium	Perpendicular	bladelet	Peresani	Hammer1	Anvil1_lab	Hard	513
10	Fe_Ex4	Fragmented	Distal	11	9	1.22222	4	Production	Flake	0		Triangular	Convex	Hinged			1-Unidirectional		Ferrara	11	Fe4	Chert	37	37	13	21.9	1	2.84615	Retouched flake	Polyhedron	angular	no	fine-grained	1	Fe_Ex4	One	Same length	2 - Medium	Perpendicular	bladelet	Peresani	Hammer1	Anvil1_lab	Hard	513
0	Fe_Ex5	Integer	Integer	28	42	0.666667	20	Final	Core	0		Rectangular triangle			flatparalelepiped	2	5-Perpendicular		Ferrara	24	Fe5	Chert	37	45	20	34.7	0.822222	1.85	Retouched flake	triangular prism	angular	no	fine-grained	1	Fe_Ex5	Two	Long + Short	2 - Medium	Perpendicular	flake, bladelet	Delpiano	Hammer1	Anvil1_lab	Hard	513
1	Fe_Ex5	Integer	Integer	14	9	1.55556	1	Production	Flake	0		Linear	Rectilinear	Feather			1-Unidirectional		Ferrara	24	Fe5	Chert	37	45	20	34.7	0.822222	1.85	Retouched flake	triangular prism	angular	no	fine-grained	1	Fe_Ex5	Two	Long + Short	2 - Medium	Perpendicular	flake, bladelet	Delpiano	Hammer1	Anvil1_lab	Hard	513
2	Fe_Ex5	Integer	Integer	31	20	1.55	6	Production	Backed flake	1-25	Mesial	Rectangular Trapeze	Rectilinear	Feather			2-Bidirectional	Anvil	Ferrara	24	Fe5	Chert	37	45	20	34.7	0.822222	1.85	Retouched flake	triangular prism	angular	no	fine-grained	1	Fe_Ex5	Two	Long + Short	2 - Medium	Perpendicular	flake, bladelet	Delpiano	Hammer1	Anvil1_lab	Hard	513
3	Fe_Ex5	Integer	Integer	13	11	1.18182	2	Production	Flake	0		Linear	Wavy	Hinged			1-Unidirectional		Ferrara	24	Fe5	Chert	37	45	20	34.7	0.822222	1.85	Retouched flake	triangular prism	angular	no	fine-grained	1	Fe_Ex5	Two	Long + Short	2 - Medium	Perpendicular	flake, bladelet	Delpiano	Hammer1	Anvil1_lab	Hard	513
4	Fe_Ex5	Integer	Integer	9	14	0.642857	2	Production	Flake	0		Linear	Rectilinear	Hinged			1-Unidirectional		Ferrara	24	Fe5	Chert	37	45	20	34.7	0.822222	1.85	Retouched flake	triangular prism	angular	no	fine-grained	1	Fe_Ex5	Two	Long + Short	2 - Medium	Perpendicular	flake, bladelet	Delpiano	Hammer1	Anvil1_lab	Hard	513
5	Fe_Ex5	Integer	Integer	12	10	1.2	2	Production	Flake	1-25	Distal	Linear	Rectilinear	Hinged			1-Unidirectional		Ferrara	24	Fe5	Chert	37	45	20	34.7	0.822222	1.85	Retouched flake	triangular prism	angular	no	fine-grained	1	Fe_Ex5	Two	Long + Short	2 - Medium	Perpendicular	flake, bladelet	Delpiano	Hammer1	Anvil1_lab	Hard	513
6	Fe_Ex5	Integer	Integer	13	13	1	2	Production	Flake	Total	Total	Linear	Rectilinear	Feather			Indet		Ferrara	24	Fe5	Chert	37	45	20	34.7	0.822222	1.85	Retouched flake	triangular prism	angular	no	fine-grained	1	Fe_Ex5	Two	Long + Short	2 - Medium	Perpendicular	flake, bladelet	Delpiano	Hammer1	Anvil1_lab	Hard	513
7	Fe_Ex5	Fragmented	Meso-Distal	13	12	1.08333	2	Production	Flake	76-99	Semi-total	Linear	Rectilinear	Feather			Indet		Ferrara	24	Fe5	Chert	37	45	20	34.7	0.822222	1.85	Retouched flake	triangular prism	angular	no	fine-grained	1	Fe_Ex5	Two	Long + Short	2 - Medium	Perpendicular	flake, bladelet	Delpiano	Hammer1	Anvil1_lab	Hard	513
8	Fe_Ex5	Fragmented	Meso-Distal	18	10	1.8	2	Production	Flake	76-99	Semi-total	Linear	Rectilinear	Hinged			Indet		Ferrara	24	Fe5	Chert	37	45	20	34.7	0.822222	1.85	Retouched flake	triangular prism	angular	no	fine-grained	1	Fe_Ex5	Two	Long + Short	2 - Medium	Perpendicular	flake, bladelet	Delpiano	Hammer1	Anvil1_lab	Hard	513
9	Fe_Ex5	Fragmented	Meso-Proximal	18	6	3	3	Production	Spall	0		Rectangular triangle	Rectilinear	Broken			5-Perpendicular	Anvil	Ferrara	24	Fe5	Chert	37	45	20	34.7	0.822222	1.85	Retouched flake	triangular prism	angular	no	fine-grained	1	Fe_Ex5	Two	Long + Short	2 - Medium	Perpendicular	flake, bladelet	Delpiano	Hammer1	Anvil1_lab	Hard	513
10	Fe_Ex5	Fragmented	Distal	15	5	3	4	Production	Spall	0		Rectangular triangle	Concave	Plunging			5-Perpendicular	Anvil	Ferrara	24	Fe5	Chert	37	45	20	34.7	0.822222	1.85	Retouched flake	triangular prism	angular	no	fine-grained	1	Fe_Ex5	Two	Long + Short	2 - Medium	Perpendicular	flake, bladelet	Delpiano	Hammer1	Anvil1_lab	Hard	513
11	Fe_Ex5	Integer	Integer	26	9	2.88889	3	Production	Bladelet	0		Linear	Twisted	Feather			2-Bidirectional	Anvil	Ferrara	24	Fe5	Chert	37	45	20	34.7	0.822222	1.85	Retouched flake	triangular prism	angular	no	fine-grained	1	Fe_Ex5	Two	Long + Short	2 - Medium	Perpendicular	flake, bladelet	Delpiano	Hammer1	Anvil1_lab	Hard	513
12	Fe_Ex5	Integer	Integer	12	4	3	1	Production	Bladelet	0		Linear	Rectilinear	Feather			2-Bidirectional		Ferrara	24	Fe5	Chert	37	45	20	34.7	0.822222	1.85	Retouched flake	triangular prism	angular	no	fine-grained	1	Fe_Ex5	Two	Long + Short	2 - Medium	Perpendicular	flake, bladelet	Delpiano	Hammer1	Anvil1_lab	Hard	513
13	Fe_Ex5	Fragmented	Lateral	11	2	5.5	1	Production	Bladelet	0		Linear	Rectilinear	Feather			Indet		Ferrara	24	Fe5	Chert	37	45	20	34.7	0.822222	1.85	Retouched flake	triangular prism	angular	no	fine-grained	1	Fe_Ex5	Two	Long + Short	2 - Medium	Perpendicular	flake, bladelet	Delpiano	Hammer1	Anvil1_lab	Hard	513
14	Fe_Ex5	Integer	Integer	14	4	3.5	1	Production	Bladelet	26-50	Lateral	Linear	Concave	Feather			5-Perpendicular		Ferrara	24	Fe5	Chert	37	45	20	34.7	0.822222	1.85	Retouched flake	triangular prism	angular	no	fine-grained	1	Fe_Ex5	Two	Long + Short	2 - Medium	Perpendicular	flake, bladelet	Delpiano	Hammer1	Anvil1_lab	Hard	513
15	Fe_Ex5	Integer	Integer	10	8	1.25	1	Production	Flake	0		Linear	Rectilinear	Feather			Indet		Ferrara	24	Fe5	Chert	37	45	20	34.7	0.822222	1.85	Retouched flake	triangular prism	angular	no	fine-grained	1	Fe_Ex5	Two	Long + Short	2 - Medium	Perpendicular	flake, bladelet	Delpiano	Hammer1	Anvil1_lab	Hard	513
16	Fe_Ex5	Integer	Integer	10	6	1.66667	1	Production	Flake	0		Linear	Rectilinear	Feather			1-Unidirectional		Ferrara	24	Fe5	Chert	37	45	20	34.7	0.822222	1.85	Retouched flake	triangular prism	angular	no	fine-grained	1	Fe_Ex5	Two	Long + Short	2 - Medium	Perpendicular	flake, bladelet	Delpiano	Hammer1	Anvil1_lab	Hard	513
17	Fe_Ex5	Fragmented	Meso-Distal	9	10	0.9	2	Production	Flake	1-25	Proximal	Linear	Rectilinear	Feather			Indet		Ferrara	24	Fe5	Chert	37	45	20	34.7	0.822222	1.85	Retouched flake	triangular prism	angular	no	fine-grained	1	Fe_Ex5	Two	Long + Short	2 - Medium	Perpendicular	flake, bladelet	Delpiano	Hammer1	Anvil1_lab	Hard	513
18	Fe_Ex5	Integer	Integer	12	10	1.2	1	Production	Flake	51-75	Lateral	Linear	Rectilinear	Feather			Indet		Ferrara	24	Fe5	Chert	37	45	20	34.7	0.822222	1.85	Retouched flake	triangular prism	angular	no	fine-grained	1	Fe_Ex5	Two	Long + Short	2 - Medium	Perpendicular	flake, bladelet	Delpiano	Hammer1	Anvil1_lab	Hard	513
19	Fe_Ex5	Fragmented	Meso-Distal	11	8	1.375	1	Production	Flake	0		Linear	Rectilinear	Feather			Indet		Ferrara	24	Fe5	Chert	37	45	20	34.7	0.822222	1.85	Retouched flake	triangular prism	angular	no	fine-grained	1	Fe_Ex5	Two	Long + Short	2 - Medium	Perpendicular	flake, bladelet	Delpiano	Hammer1	Anvil1_lab	Hard	513
20	Fe_Ex5	Integer	Integer	11	10	1.1	3	Production	Flake	0		Linear	Concave	Feather			1-Unidirectional		Ferrara	24	Fe5	Chert	37	45	20	34.7	0.822222	1.85	Retouched flake	triangular prism	angular	no	fine-grained	1	Fe_Ex5	Two	Long + Short	2 - Medium	Perpendicular	flake, bladelet	Delpiano	Hammer1	Anvil1_lab	Hard	513
21	Fe_Ex5	Integer	Integer	12	7	1.71429	1	Production	Flake	0		Linear	Rectilinear	Feather			1-Unidirectional		Ferrara	24	Fe5	Chert	37	45	20	34.7	0.822222	1.85	Retouched flake	triangular prism	angular	no	fine-grained	1	Fe_Ex5	Two	Long + Short	2 - Medium	Perpendicular	flake, bladelet	Delpiano	Hammer1	Anvil1_lab	Hard	513
22	Fe_Ex5	Fragmented	Meso-Distal	6	13	0.461538	2	Production	Flake	0		Linear	Rectilinear	Hinged			1-Unidirectional		Ferrara	24	Fe5	Chert	37	45	20	34.7	0.822222	1.85	Retouched flake	triangular prism	angular	no	fine-grained	1	Fe_Ex5	Two	Long + Short	2 - Medium	Perpendicular	flake, bladelet	Delpiano	Hammer1	Anvil1_lab	Hard	513
23	Fe_Ex5	Integer	Integer	11	11	1	1	Production	Flake	0		Linear	Twisted	Feather			5-Perpendicular		Ferrara	24	Fe5	Chert	37	45	20	34.7	0.822222	1.85	Retouched flake	triangular prism	angular	no	fine-grained	1	Fe_Ex5	Two	Long + Short	2 - Medium	Perpendicular	flake, bladelet	Delpiano	Hammer1	Anvil1_lab	Hard	513
0	Fe_Ex6	Integer	Integer	44	28	1.57143	14	Final	Core	0		Triangular			flatparalelepiped	1	2-Bidirectional		Ferrara	6	Fe6	Chert	48	47	16	34.7	1.02128	3	Flake	Polyhedron	angular	no	fine-grained	1	Fe_Ex6	One	Same length	1 - Low	Perpendicular	flake, blade	Peresani	Hammer2	Anvil1_lab	Hard	394
1	Fe_Ex6	Integer	Integer	42	16	2.625	8	Production	Blade	0		Triangular	Twisted	Plunging			1-Unidirectional	Anvil	Ferrara	6	Fe6	Chert	48	47	16	34.7	1.02128	3	Flake	Polyhedron	angular	no	fine-grained	1	Fe_Ex6	One	Same length	1 - Low	Perpendicular	flake, blade	Peresani	Hammer2	Anvil1_lab	Hard	394
2	Fe_Ex6	Integer	Integer	13	10	1.3	1	Production	Flake	0		Linear	Rectilinear	Feather			1-Unidirectional		Ferrara	6	Fe6	Chert	48	47	16	34.7	1.02128	3	Flake	Polyhedron	angular	no	fine-grained	1	Fe_Ex6	One	Same length	1 - Low	Perpendicular	flake, blade	Peresani	Hammer2	Anvil1_lab	Hard	394
3	Fe_Ex6	Integer	Integer	17	11	1.54545	2	Production	Flake	0		Linear	Concave	Feather			1-Unidirectional		Ferrara	6	Fe6	Chert	48	47	16	34.7	1.02128	3	Flake	Polyhedron	angular	no	fine-grained	1	Fe_Ex6	One	Same length	1 - Low	Perpendicular	flake, blade	Peresani	Hammer2	Anvil1_lab	Hard	394
4	Fe_Ex6	Fragmented	Proximal	11	16	0.6875	4	Production	Flake	0		Linear	Convex	Broken			1-Unidirectional		Ferrara	6	Fe6	Chert	48	47	16	34.7	1.02128	3	Flake	Polyhedron	angular	no	fine-grained	1	Fe_Ex6	One	Same length	1 - Low	Perpendicular	flake, blade	Peresani	Hammer2	Anvil1_lab	Hard	394
5	Fe_Ex6	Integer	Integer	47	18	2.61111	11	Final	Blade	0		Triangular	Twisted	Plunging			2-Bidirectional		Ferrara	6	Fe6	Chert	48	47	16	34.7	1.02128	3	Flake	Polyhedron	angular	no	fine-grained	1	Fe_Ex6	One	Same length	1 - Low	Perpendicular	flake, blade	Peresani	Hammer2	Anvil1_lab	Hard	394
0	Fe_Ex7	Integer	Integer	30	32	0.9375	8	Final	Core	26-50		Linear			Flat	1	2-Bidirectional		Ferrara	12	Fe7	Chert				11.5	#DIV/0!	#DIV/0!	Flake	Polyhedron	angular	no	fine-grained	1	Fe_Ex7	Two	Long + Short	2 - Medium	Perpendicular	flake	Delpiano	Hammer1	Anvil1_lab	Hard	513
1	Fe_Ex7	Integer	Integer	12	11	1.09091	1	Production	Flake	0		Linear	Rectilinear	Hinged			1-Unidirectional		Ferrara	12	Fe7	Chert				11.5	#DIV/0!	#DIV/0!	Flake	Polyhedron	angular	no	fine-grained	1	Fe_Ex7	Two	Long + Short	2 - Medium	Perpendicular	flake	Delpiano	Hammer1	Anvil1_lab	Hard	513
2	Fe_Ex7	Integer	Integer	14	9	1.55556	2	Production	Flake	0		Linear	Rectilinear	Feather			1-Unidirectional		Ferrara	12	Fe7	Chert				11.5	#DIV/0!	#DIV/0!	Flake	Polyhedron	angular	no	fine-grained	1	Fe_Ex7	Two	Long + Short	2 - Medium	Perpendicular	flake	Delpiano	Hammer1	Anvil1_lab	Hard	513
3	Fe_Ex7	Integer	Integer	15	11	1.36364	1	Production	Flake	0		Linear	Rectilinear	Hinged			Indet		Ferrara	12	Fe7	Chert				11.5	#DIV/0!	#DIV/0!	Flake	Polyhedron	angular	no	fine-grained	1	Fe_Ex7	Two	Long + Short	2 - Medium	Perpendicular	flake	Delpiano	Hammer1	Anvil1_lab	Hard	513
4	Fe_Ex7	Integer	Integer	16	25	0.64	3	Production	Flake	1-25	Lateral	Linear	Rectilinear	Feather			2-Bidirectional	Direct	Ferrara	12	Fe7	Chert				11.5	#DIV/0!	#DIV/0!	Flake	Polyhedron	angular	no	fine-grained	1	Fe_Ex7	Two	Long + Short	2 - Medium	Perpendicular	flake	Delpiano	Hammer1	Anvil1_lab	Hard	513
5	Fe_Ex7	Fragmented	Mesial	11	13	0.846154	1	Production	Flake	0		Linear	Rectilinear	Broken			2-Bidirectional		Ferrara	12	Fe7	Chert				11.5	#DIV/0!	#DIV/0!	Flake	Polyhedron	angular	no	fine-grained	1	Fe_Ex7	Two	Long + Short	2 - Medium	Perpendicular	flake	Delpiano	Hammer1	Anvil1_lab	Hard	513
6	Fe_Ex7	Integer	Integer	22	10	2.2	3	Production	Bladelet	0		Linear	Wavy	Hinged			2-Bidirectional	Anvil	Ferrara	12	Fe7	Chert				11.5	#DIV/0!	#DIV/0!	Flake	Polyhedron	angular	no	fine-grained	1	Fe_Ex7	Two	Long + Short	2 - Medium	Perpendicular	flake	Delpiano	Hammer1	Anvil1_lab	Hard	513
7	Fe_Ex7	Fragmented	Meso-Distal	18	10	1.8	4	Production	Flake	Total	Total	Rectangular triangle	Rectilinear	Feather			Indet		Ferrara	12	Fe7	Chert				11.5	#DIV/0!	#DIV/0!	Flake	Polyhedron	angular	no	fine-grained	1	Fe_Ex7	Two	Long + Short	2 - Medium	Perpendicular	flake	Delpiano	Hammer1	Anvil1_lab	Hard	513
8	Fe_Ex7	Integer	Integer	9	11	0.818182	2	Production	Flake	0		Linear	Rectilinear	Feather			1-Unidirectional		Ferrara	12	Fe7	Chert				11.5	#DIV/0!	#DIV/0!	Flake	Polyhedron	angular	no	fine-grained	1	Fe_Ex7	Two	Long + Short	2 - Medium	Perpendicular	flake	Delpiano	Hammer1	Anvil1_lab	Hard	513
9	Fe_Ex7	Integer	Integer	12	8	1.5	3	Production	Flake	0		Linear	Wavy	Feather			Indet		Ferrara	12	Fe7	Chert				11.5	#DIV/0!	#DIV/0!	Flake	Polyhedron	angular	no	fine-grained	1	Fe_Ex7	Two	Long + Short	2 - Medium	Perpendicular	flake	Delpiano	Hammer1	Anvil1_lab	Hard	513
10	Fe_Ex7	Integer	Integer	11	8	1.375	1	Production	Flake	0		Linear	Rectilinear	Feather			Indet		Ferrara	12	Fe7	Chert				11.5	#DIV/0!	#DIV/0!	Flake	Polyhedron	angular	no	fine-grained	1	Fe_Ex7	Two	Long + Short	2 - Medium	Perpendicular	flake	Delpiano	Hammer1	Anvil1_lab	Hard	513
11	Fe_Ex7	Fragmented	Distal	8	13	0.615385	1	Production	Flake	0		Linear	Rectilinear	Feather			Indet		Ferrara	12	Fe7	Chert				11.5	#DIV/0!	#DIV/0!	Flake	Polyhedron	angular	no	fine-grained	1	Fe_Ex7	Two	Long + Short	2 - Medium	Perpendicular	flake	Delpiano	Hammer1	Anvil1_lab	Hard	513
0	Fe_Ex8	Integer	Integer	34	27	1.25926	13	Final	Core	0		Half circles			flatparalelepiped	1	2-Bidirectional		Ferrara	12	Fe8	Chert	44	30	13	18	1.46667	3.38462	Flake	Polyhedron	angular	no	fine-grained	1	Fe_Ex8	One	Long	2 - Medium	Perpendicular	flake, bladelet	Delpiano	Hammer1	Anvil1_lab	Hard	513
1	Fe_Ex8	Integer	Integer	29	12	2.41667	2	Production	Bladelet	0		Linear	Rectilinear	Feather			1-Unidirectional	Anvil	Ferrara	12	Fe8	Chert	44	30	13	18	1.46667	3.38462	Flake	Polyhedron	angular	no	fine-grained	1	Fe_Ex8	One	Long	2 - Medium	Perpendicular	flake, bladelet	Delpiano	Hammer1	Anvil1_lab	Hard	513
2	Fe_Ex8	Integer	Integer	11	3	3.66667	1	Production	Bladelet	0		Linear	Rectilinear	Feather			1-Unidirectional		Ferrara	12	Fe8	Chert	44	30	13	18	1.46667	3.38462	Flake	Polyhedron	angular	no	fine-grained	1	Fe_Ex8	One	Long	2 - Medium	Perpendicular	flake, bladelet	Delpiano	Hammer1	Anvil1_lab	Hard	513
3	Fe_Ex8	Fragmented	Meso-Distal	22	8	2.75	1	Production	Bladelet	0		Linear	Concave	Feather			1-Unidirectional	Anvil	Ferrara	12	Fe8	Chert	44	30	13	18	1.46667	3.38462	Flake	Polyhedron	angular	no	fine-grained	1	Fe_Ex8	One	Long	2 - Medium	Perpendicular	flake, bladelet	Delpiano	Hammer1	Anvil1_lab	Hard	513
4	Fe_Ex8	Fragmented	Mesial	14	7	2	3	Production	Bladelet	0		Triangular	Rectilinear	Broken			Indet		Ferrara	12	Fe8	Chert	44	30	13	18	1.46667	3.38462	Flake	Polyhedron	angular	no	fine-grained	1	Fe_Ex8	One	Long	2 - Medium	Perpendicular	flake, bladelet	Delpiano	Hammer1	Anvil1_lab	Hard	513
5	Fe_Ex8	Fragmented	Meso-Distal	15	4	3.75	3	Production	Spall	0		Triangular	Rectilinear	Broken			1-Unidirectional		Ferrara	12	Fe8	Chert	44	30	13	18	1.46667	3.38462	Flake	Polyhedron	angular	no	fine-grained	1	Fe_Ex8	One	Long	2 - Medium	Perpendicular	flake, bladelet	Delpiano	Hammer1	Anvil1_lab	Hard	513
6	Fe_Ex8	Fragmented	Proximal	13	8	1.625	4	Production	Spall	0		Rectangular triangle	Rectilinear	Broken			5-Perpendicular	Anvil	Ferrara	12	Fe8	Chert	44	30	13	18	1.46667	3.38462	Flake	Polyhedron	angular	no	fine-grained	1	Fe_Ex8	One	Long	2 - Medium	Perpendicular	flake, bladelet	Delpiano	Hammer1	Anvil1_lab	Hard	513
7	Fe_Ex8	Integer	Integer	16	14	1.14286	2	Production	Flake	0		Rectangular triangle	Twisted	Feather			1-Unidirectional		Ferrara	12	Fe8	Chert	44	30	13	18	1.46667	3.38462	Flake	Polyhedron	angular	no	fine-grained	1	Fe_Ex8	One	Long	2 - Medium	Perpendicular	flake, bladelet	Delpiano	Hammer1	Anvil1_lab	Hard	513
8	Fe_Ex8	Fragmented	Distal	16	9	1.77778	5	Production	Spall	0		Triangular	Convex	Hinged			5-Perpendicular	Anvil	Ferrara	12	Fe8	Chert	44	30	13	18	1.46667	3.38462	Flake	Polyhedron	angular	no	fine-grained	1	Fe_Ex8	One	Long	2 - Medium	Perpendicular	flake, bladelet	Delpiano	Hammer1	Anvil1_lab	Hard	513
9	Fe_Ex8	Integer	Integer	10	16	0.625	1	Production	Flake	0		Linear	Rectilinear	Hinged			1-Unidirectional		Ferrara	12	Fe8	Chert	44	30	13	18	1.46667	3.38462	Flake	Polyhedron	angular	no	fine-grained	1	Fe_Ex8	One	Long	2 - Medium	Perpendicular	flake, bladelet	Delpiano	Hammer1	Anvil1_lab	Hard	513
10	Fe_Ex8	Fragmented	Mesial	12	10	1.2	3	Production	Spall	0		Rectangular triangle	Rectilinear	Broken			5-Perpendicular	Anvil	Ferrara	12	Fe8	Chert	44	30	13	18	1.46667	3.38462	Flake	Polyhedron	angular	no	fine-grained	1	Fe_Ex8	One	Long	2 - Medium	Perpendicular	flake, bladelet	Delpiano	Hammer1	Anvil1_lab	Hard	513
11	Fe_Ex8	Fragmented	Distal	13	11	1.18182	2	Production	Flake	0		Linear	Rectilinear	Broken			2-Bidirectional		Ferrara	12	Fe8	Chert	44	30	13	18	1.46667	3.38462	Flake	Polyhedron	angular	no	fine-grained	1	Fe_Ex8	One	Long	2 - Medium	Perpendicular	flake, bladelet	Delpiano	Hammer1	Anvil1_lab	Hard	513
0	Fe_Ex9	Integer	Integer	33	30	1.1	10	Final	Core	0		Irregular			flatparalelepiped	2	4-Multidirectional		Ferrara	19	Fe9	Chert	56	47	14	24.2	1.19149	4	Flake	Polyhedron	angular	no	fine-grained	1	Fe_Ex9	Two	Long + Short	3 - Exhausted	Perpendicular, oblique	flake, bladelet	Delpiano	Hammer1	Anvil2_Cantina	Hard	513
1	Fe_Ex9	Integer	Integer	20	15	1.33333	2	Production	Flake	0		Linear	Rectilinear	Hinged			1-Unidirectional		Ferrara	19	Fe9	Chert	56	47	14	24.2	1.19149	4	Flake	Polyhedron	angular	no	fine-grained	1	Fe_Ex9	Two	Long + Short	3 - Exhausted	Perpendicular, oblique	flake, bladelet	Delpiano	Hammer1	Anvil2_Cantina	Hard	513
2	Fe_Ex9	Fragmented	Meso-Proximal	20	21	0.952381	5	Production	Flake	0		Triangular	Convex	Broken			1-Unidirectional		Ferrara	19	Fe9	Chert	56	47	14	24.2	1.19149	4	Flake	Polyhedron	angular	no	fine-grained	1	Fe_Ex9	Two	Long + Short	3 - Exhausted	Perpendicular, oblique	flake, bladelet	Delpiano	Hammer1	Anvil2_Cantina	Hard	513
3	Fe_Ex9	Fragmented	Mesial	13	18	0.722222	6	Production	Flake	0		Rectangular triangle	Rectilinear	Broken			2-Bidirectional		Ferrara	19	Fe9	Chert	56	47	14	24.2	1.19149	4	Flake	Polyhedron	angular	no	fine-grained	1	Fe_Ex9	Two	Long + Short	3 - Exhausted	Perpendicular, oblique	flake, bladelet	Delpiano	Hammer1	Anvil2_Cantina	Hard	513
4	Fe_Ex9	Integer	Integer	14	12	1.16667	2	Production	Flake	0		Linear	Convex	Hinged			5-Perpendicular		Ferrara	19	Fe9	Chert	56	47	14	24.2	1.19149	4	Flake	Polyhedron	angular	no	fine-grained	1	Fe_Ex9	Two	Long + Short	3 - Exhausted	Perpendicular, oblique	flake, bladelet	Delpiano	Hammer1	Anvil2_Cantina	Hard	513
5	Fe_Ex9	Integer	Integer	19	35	0.542857	5	Maintenance	Flake	0		Linear	Rectilinear	Hinged			4-Multidirectional	Direct	Ferrara	19	Fe9	Chert	56	47	14	24.2	1.19149	4	Flake	Polyhedron	angular	no	fine-grained	1	Fe_Ex9	Two	Long + Short	3 - Exhausted	Perpendicular, oblique	flake, bladelet	Delpiano	Hammer1	Anvil2_Cantina	Hard	513
6	Fe_Ex9	Fragmented	Meso-Distal	17	15	1.13333	1	Production	Flake	0		Linear	Rectilinear	Hinged			1-Unidirectional		Ferrara	19	Fe9	Chert	56	47	14	24.2	1.19149	4	Flake	Polyhedron	angular	no	fine-grained	1	Fe_Ex9	Two	Long + Short	3 - Exhausted	Perpendicular, oblique	flake, bladelet	Delpiano	Hammer1	Anvil2_Cantina	Hard	513
7	Fe_Ex9	Integer	Integer	12	16	0.75	2	Production	Flake	0		Linear	Rectilinear	Hinged			5-Perpendicular		Ferrara	19	Fe9	Chert	56	47	14	24.2	1.19149	4	Flake	Polyhedron	angular	no	fine-grained	1	Fe_Ex9	Two	Long + Short	3 - Exhausted	Perpendicular, oblique	flake, bladelet	Delpiano	Hammer1	Anvil2_Cantina	Hard	513
8	Fe_Ex9	Integer	Integer	18	10	1.8	1	Production	Flake	0		Linear	Rectilinear	Feather			Indet	Direct	Ferrara	19	Fe9	Chert	56	47	14	24.2	1.19149	4	Flake	Polyhedron	angular	no	fine-grained	1	Fe_Ex9	Two	Long + Short	3 - Exhausted	Perpendicular, oblique	flake, bladelet	Delpiano	Hammer1	Anvil2_Cantina	Hard	513
9	Fe_Ex9	Integer	Integer	32	10	3.2	4	Production	Bladelet	0		Rectangular triangle	Rectilinear	Feather			5-Perpendicular		Ferrara	19	Fe9	Chert	56	47	14	24.2	1.19149	4	Flake	Polyhedron	angular	no	fine-grained	1	Fe_Ex9	Two	Long + Short	3 - Exhausted	Perpendicular, oblique	flake, bladelet	Delpiano	Hammer1	Anvil2_Cantina	Hard	513
10	Fe_Ex9	Integer	Integer	19	8	2.375	4	Production	Bladelet	0		Triangular	Rectilinear	Feather			2-Bidirectional	Anvil	Ferrara	19	Fe9	Chert	56	47	14	24.2	1.19149	4	Flake	Polyhedron	angular	no	fine-grained	1	Fe_Ex9	Two	Long + Short	3 - Exhausted	Perpendicular, oblique	flake, bladelet	Delpiano	Hammer1	Anvil2_Cantina	Hard	513
11	Fe_Ex9	Fragmented	Mesial	14	6	2.33333	2	Production	Bladelet	0		Linear	Rectilinear	Feather			Indet		Ferrara	19	Fe9	Chert	56	47	14	24.2	1.19149	4	Flake	Polyhedron	angular	no	fine-grained	1	Fe_Ex9	Two	Long + Short	3 - Exhausted	Perpendicular, oblique	flake, bladelet	Delpiano	Hammer1	Anvil2_Cantina	Hard	513
12	Fe_Ex9	Fragmented	Meso-Proximal	21	10	2.1	6	Production	Spall	0		Rectangular Trapeze	Rectilinear	Broken			2-Bidirectional	Anvil	Ferrara	19	Fe9	Chert	56	47	14	24.2	1.19149	4	Flake	Polyhedron	angular	no	fine-grained	1	Fe_Ex9	Two	Long + Short	3 - Exhausted	Perpendicular, oblique	flake, bladelet	Delpiano	Hammer1	Anvil2_Cantina	Hard	513
13	Fe_Ex9	Integer	Integer	23	6	3.83333	5	Production	Spall	0		Rectangular triangle	Twisted	Plunging			2-Bidirectional	Anvil	Ferrara	19	Fe9	Chert	56	47	14	24.2	1.19149	4	Flake	Polyhedron	angular	no	fine-grained	1	Fe_Ex9	Two	Long + Short	3 - Exhausted	Perpendicular, oblique	flake, bladelet	Delpiano	Hammer1	Anvil2_Cantina	Hard	513
14	Fe_Ex9	Integer	Integer	13	11	1.18182	1	Production	Flake	0		Linear	Convex	Feather			1-Unidirectional		Ferrara	19	Fe9	Chert	56	47	14	24.2	1.19149	4	Flake	Polyhedron	angular	no	fine-grained	1	Fe_Ex9	Two	Long + Short	3 - Exhausted	Perpendicular, oblique	flake, bladelet	Delpiano	Hammer1	Anvil2_Cantina	Hard	513
15	Fe_Ex9	Fragmented	Mesial	13	5	2.6	2	Production	Flake	0		Irregular		Broken			Indet		Ferrara	19	Fe9	Chert	56	47	14	24.2	1.19149	4	Flake	Polyhedron	angular	no	fine-grained	1	Fe_Ex9	Two	Long + Short	3 - Exhausted	Perpendicular, oblique	flake, bladelet	Delpiano	Hammer1	Anvil2_Cantina	Hard	513
16	Fe_Ex9	Fragmented	Distal	13	10	1.3	1	Production	Flake	0		Linear	Rectilinear	Feather			Indet		Ferrara	19	Fe9	Chert	56	47	14	24.2	1.19149	4	Flake	Polyhedron	angular	no	fine-grained	1	Fe_Ex9	Two	Long + Short	3 - Exhausted	Perpendicular, oblique	flake, bladelet	Delpiano	Hammer1	Anvil2_Cantina	Hard	513
17	Fe_Ex9	Fragmented	Proximal	12	10	1.2	1	Production	Flake	0		Linear	Rectilinear	Broken			1-Unidirectional		Ferrara	19	Fe9	Chert	56	47	14	24.2	1.19149	4	Flake	Polyhedron	angular	no	fine-grained	1	Fe_Ex9	Two	Long + Short	3 - Exhausted	Perpendicular, oblique	flake, bladelet	Delpiano	Hammer1	Anvil2_Cantina	Hard	513
18	Fe_Ex9	Integer	Integer	8	12	0.666667	1	Production	Flake	0		Linear	Rectilinear	Feather			1-Unidirectional		Ferrara	19	Fe9	Chert	56	47	14	24.2	1.19149	4	Flake	Polyhedron	angular	no	fine-grained	1	Fe_Ex9	Two	Long + Short	3 - Exhausted	Perpendicular, oblique	flake, bladelet	Delpiano	Hammer1	Anvil2_Cantina	Hard	513
0	Fe_Ex10	Integer	Integer	23	22	1.04545	7	Final	Core	0		Triangular			Flat	2	4-Multidirectional		Ferrara	8	Fe10	Chert	40	30	10	10.4	1.33333	4	Flake	Polyhedron	angular	no	fine-grained	1	Fe_Ex10	One	Short	3 - Exhausted	Perpendicular	flake, bladelet	Delpiano	Hammer1	Anvil2_Cantina	Hard	513
1	Fe_Ex10	Fragmented	Meso-Distal	13	11	1.18182	1	Production	Flake	0		Linear	Rectilinear	Feather			5-Perpendicular		Ferrara	8	Fe10	Chert	40	30	10	10.4	1.33333	4	Flake	Polyhedron	angular	no	fine-grained	1	Fe_Ex10	One	Short	3 - Exhausted	Perpendicular	flake, bladelet	Delpiano	Hammer1	Anvil2_Cantina	Hard	513
2	Fe_Ex10	Integer	Integer	15	12	1.25	2	Production	Flake	0		Linear	Rectilinear	Feather			Indet	Anvil	Ferrara	8	Fe10	Chert	40	30	10	10.4	1.33333	4	Flake	Polyhedron	angular	no	fine-grained	1	Fe_Ex10	One	Short	3 - Exhausted	Perpendicular	flake, bladelet	Delpiano	Hammer1	Anvil2_Cantina	Hard	513
3	Fe_Ex10	Integer	Integer	22	20	1.1	7	Production	Flake	0		Triangular	Convex	Feather			1-Unidirectional		Ferrara	8	Fe10	Chert	40	30	10	10.4	1.33333	4	Flake	Polyhedron	angular	no	fine-grained	1	Fe_Ex10	One	Short	3 - Exhausted	Perpendicular	flake, bladelet	Delpiano	Hammer1	Anvil2_Cantina	Hard	513
4	Fe_Ex10	Integer	Integer	26	7	3.71429	9	Production	Spall	1-25	Lateral	Trapeze	Concave	Plunging			5-Perpendicular	Anvil	Ferrara	8	Fe10	Chert	40	30	10	10.4	1.33333	4	Flake	Polyhedron	angular	no	fine-grained	1	Fe_Ex10	One	Short	3 - Exhausted	Perpendicular	flake, bladelet	Delpiano	Hammer1	Anvil2_Cantina	Hard	513
5	Fe_Ex10	Integer	Integer	26	13	2	5	Production	Blade	1-25	Proximal	Linear	Twisted	Plunging			5-Perpendicular	Direct	Ferrara	8	Fe10	Chert	40	30	10	10.4	1.33333	4	Flake	Polyhedron	angular	no	fine-grained	1	Fe_Ex10	One	Short	3 - Exhausted	Perpendicular	flake, bladelet	Delpiano	Hammer1	Anvil2_Cantina	Hard	513
6	Fe_Ex10	Integer	Integer	12	7	1.71429	1	Production	Flake	0		Linear	Rectilinear	Feather			Indet		Ferrara	8	Fe10	Chert	40	30	10	10.4	1.33333	4	Flake	Polyhedron	angular	no	fine-grained	1	Fe_Ex10	One	Short	3 - Exhausted	Perpendicular	flake, bladelet	Delpiano	Hammer1	Anvil2_Cantina	Hard	513
7	Fe_Ex10	Fragmented	Distal	12	7	1.71429	1	Production	Flake	0		Linear	Rectilinear	Feather			Indet		Ferrara	8	Fe10	Chert	40	30	10	10.4	1.33333	4	Flake	Polyhedron	angular	no	fine-grained	1	Fe_Ex10	One	Short	3 - Exhausted	Perpendicular	flake, bladelet	Delpiano	Hammer1	Anvil2_Cantina	Hard	513
0	Fe_Ex11	Integer	Integer	32	28	1.14286	6	Final	Core	0		Linear			flatparalelepiped	2	5-Perpendicular		Ferrara	19	Fe11	Chert	40	36	11	17.6	1.11111	3.63636	Retouched flake	Polyhedron	angular	no	fine-grained	1	Fe_Ex11	One	Long	3 - Exhausted	Perpendicular	flake, bladelet	Delpiano	Hammer1	Anvil2_Cantina	Hard	513
1	Fe_Ex11	Fragmented	Meso-Distal	14	6	2.33333	1	Production	Bladelet	0		Linear	Rectilinear	Feather			Indet		Ferrara	19	Fe11	Chert	40	36	11	17.6	1.11111	3.63636	Retouched flake	Polyhedron	angular	no	fine-grained	1	Fe_Ex11	One	Long	3 - Exhausted	Perpendicular	flake, bladelet	Delpiano	Hammer1	Anvil2_Cantina	Hard	513
2	Fe_Ex11	Fragmented	Meso-Distal	16	7	2.28571	1	Production	Bladelet	0		Linear	Rectilinear	Feather			Indet	Anvil	Ferrara	19	Fe11	Chert	40	36	11	17.6	1.11111	3.63636	Retouched flake	Polyhedron	angular	no	fine-grained	1	Fe_Ex11	One	Long	3 - Exhausted	Perpendicular	flake, bladelet	Delpiano	Hammer1	Anvil2_Cantina	Hard	513
3	Fe_Ex11	Fragmented	Meso-Proximal	13	6	2.16667	2	Production	Bladelet	0		Triangular	Twisted	Broken			1-Unidirectional		Ferrara	19	Fe11	Chert	40	36	11	17.6	1.11111	3.63636	Retouched flake	Polyhedron	angular	no	fine-grained	1	Fe_Ex11	One	Long	3 - Exhausted	Perpendicular	flake, bladelet	Delpiano	Hammer1	Anvil2_Cantina	Hard	513
4	Fe_Ex11	Fragmented	Meso-Proximal	19	8	2.375	4	Production	Spall	0		Rectangular Trapeze	Convex	Broken			5-Perpendicular	Direct	Ferrara	19	Fe11	Chert	40	36	11	17.6	1.11111	3.63636	Retouched flake	Polyhedron	angular	no	fine-grained	1	Fe_Ex11	One	Long	3 - Exhausted	Perpendicular	flake, bladelet	Delpiano	Hammer1	Anvil2_Cantina	Hard	513
5	Fe_Ex11	Fragmented	Distal	11	6	1.83333	3	Production	Spall	0		Triangular	Concave	Plunging			2-Bidirectional	Direct	Ferrara	19	Fe11	Chert	40	36	11	17.6	1.11111	3.63636	Retouched flake	Polyhedron	angular	no	fine-grained	1	Fe_Ex11	One	Long	3 - Exhausted	Perpendicular	flake, bladelet	Delpiano	Hammer1	Anvil2_Cantina	Hard	513
6	Fe_Ex11	Fragmented	Distal	9	16	0.5625	1	Production	Flake	0		Linear	Convex	Feather			1-Unidirectional		Ferrara	19	Fe11	Chert	40	36	11	17.6	1.11111	3.63636	Retouched flake	Polyhedron	angular	no	fine-grained	1	Fe_Ex11	One	Long	3 - Exhausted	Perpendicular	flake, bladelet	Delpiano	Hammer1	Anvil2_Cantina	Hard	513
7	Fe_Ex11	Fragmented	Composite	14	11	1.27273	3	Production	Chunk	0		Triangular	Concave	Plunging			4-Multidirectional		Ferrara	19	Fe11	Chert	40	36	11	17.6	1.11111	3.63636	Retouched flake	Polyhedron	angular	no	fine-grained	1	Fe_Ex11	One	Long	3 - Exhausted	Perpendicular	flake, bladelet	Delpiano	Hammer1	Anvil2_Cantina	Hard	513
8	Fe_Ex11	Integer	Integer	20	26	0.769231	4	Production	Flake	0		Linear	Convex	Hinged			1-Unidirectional	Direct	Ferrara	19	Fe11	Chert	40	36	11	17.6	1.11111	3.63636	Retouched flake	Polyhedron	angular	no	fine-grained	1	Fe_Ex11	One	Long	3 - Exhausted	Perpendicular	flake, bladelet	Delpiano	Hammer1	Anvil2_Cantina	Hard	513
9	Fe_Ex11	Integer	Integer	13	13	1	2	Production	Flake	0		Linear	Rectilinear	Feather			1-Unidirectional		Ferrara	19	Fe11	Chert	40	36	11	17.6	1.11111	3.63636	Retouched flake	Polyhedron	angular	no	fine-grained	1	Fe_Ex11	One	Long	3 - Exhausted	Perpendicular	flake, bladelet	Delpiano	Hammer1	Anvil2_Cantina	Hard	513
10	Fe_Ex11	Integer	Integer	22	16	1.375	4	Production	Flake	0		Linear	Rectilinear	Feather			1-Unidirectional	Direct	Ferrara	19	Fe11	Chert	40	36	11	17.6	1.11111	3.63636	Retouched flake	Polyhedron	angular	no	fine-grained	1	Fe_Ex11	One	Long	3 - Exhausted	Perpendicular	flake, bladelet	Delpiano	Hammer1	Anvil2_Cantina	Hard	513
11	Fe_Ex11	Integer	Integer	18	21	0.857143	4	Production	Flake	0		Linear	Wavy	Plunging			2-Bidirectional	Anvil	Ferrara	19	Fe11	Chert	40	36	11	17.6	1.11111	3.63636	Retouched flake	Polyhedron	angular	no	fine-grained	1	Fe_Ex11	One	Long	3 - Exhausted	Perpendicular	flake, bladelet	Delpiano	Hammer1	Anvil2_Cantina	Hard	513
12	Fe_Ex11	Fragmented	Distal	9	13	0.692308	1	Production	Flake	0		Linear	Rectilinear	Hinged			1-Unidirectional		Ferrara	19	Fe11	Chert	40	36	11	17.6	1.11111	3.63636	Retouched flake	Polyhedron	angular	no	fine-grained	1	Fe_Ex11	One	Long	3 - Exhausted	Perpendicular	flake, bladelet	Delpiano	Hammer1	Anvil2_Cantina	Hard	513
13	Fe_Ex11	Integer	Integer	10	13	0.769231	1	Production	Flake	0		Linear	Rectilinear	Feather			1-Unidirectional		Ferrara	19	Fe11	Chert	40	36	11	17.6	1.11111	3.63636	Retouched flake	Polyhedron	angular	no	fine-grained	1	Fe_Ex11	One	Long	3 - Exhausted	Perpendicular	flake, bladelet	Delpiano	Hammer1	Anvil2_Cantina	Hard	513
14	Fe_Ex11	Integer	Integer	11	10	1.1	1	Production	Flake	0		Linear	Rectilinear	Feather			Indet		Ferrara	19	Fe11	Chert	40	36	11	17.6	1.11111	3.63636	Retouched flake	Polyhedron	angular	no	fine-grained	1	Fe_Ex11	One	Long	3 - Exhausted	Perpendicular	flake, bladelet	Delpiano	Hammer1	Anvil2_Cantina	Hard	513
15	Fe_Ex11	Fragmented	Composite	11	14	0.785714	1	Production	Chunk	0		Linear	Rectilinear	Feather			Indet		Ferrara	19	Fe11	Chert	40	36	11	17.6	1.11111	3.63636	Retouched flake	Polyhedron	angular	no	fine-grained	1	Fe_Ex11	One	Long	3 - Exhausted	Perpendicular	flake, bladelet	Delpiano	Hammer1	Anvil2_Cantina	Hard	513
16	Fe_Ex11	Fragmented	Distal	8	10	0.8	1	Production	Flake	0		Linear	Rectilinear	Hinged			1-Unidirectional		Ferrara	19	Fe11	Chert	40	36	11	17.6	1.11111	3.63636	Retouched flake	Polyhedron	angular	no	fine-grained	1	Fe_Ex11	One	Long	3 - Exhausted	Perpendicular	flake, bladelet	Delpiano	Hammer1	Anvil2_Cantina	Hard	513
17	Fe_Ex11	Fragmented	Distal	9	13	0.692308	1	Production	Flake	0		Linear	Rectilinear	Feather			Indet		Ferrara	19	Fe11	Chert	40	36	11	17.6	1.11111	3.63636	Retouched flake	Polyhedron	angular	no	fine-grained	1	Fe_Ex11	One	Long	3 - Exhausted	Perpendicular	flake, bladelet	Delpiano	Hammer1	Anvil2_Cantina	Hard	513
18	Fe_Ex11	Fragmented	Composite	15	10	1.5	5	Production	Chunk	0		Triangular		Broken			Indet		Ferrara	19	Fe11	Chert	40	36	11	17.6	1.11111	3.63636	Retouched flake	Polyhedron	angular	no	fine-grained	1	Fe_Ex11	One	Long	3 - Exhausted	Perpendicular	flake, bladelet	Delpiano	Hammer1	Anvil2_Cantina	Hard	513
0	Fe_Ex12	Integer	Integer	33	22	1.5	11	Final	Core	0		Trapeze			Truncated pyramid/frustum	3	4-Multidirectional		Ferrara	19	Fe12	Chert	50	30	14	18.5	1.66667	3.57143	Retouched flake	triangular prism	angular	no	fine-grained	1	Fe_Ex12	One	Long	3 - Exhausted	Perpendicular, oblique	bladelet	Delpiano	Hammer1	Anvil2_Cantina	Hard	513
1	Fe_Ex12	Integer	Integer	26	8	3.25	4	Production	Bladelet	0		Triangular	Concave	Feather			2-Bidirectional	Direct	Ferrara	19	Fe12	Chert	50	30	14	18.5	1.66667	3.57143	Retouched flake	triangular prism	angular	no	fine-grained	1	Fe_Ex12	One	Long	3 - Exhausted	Perpendicular, oblique	bladelet	Delpiano	Hammer1	Anvil2_Cantina	Hard	513
2	Fe_Ex12	Integer	Integer	16	6	2.66667	1	Production	Bladelet	0		Triangular	Concave	Feather			1-Unidirectional		Ferrara	19	Fe12	Chert	50	30	14	18.5	1.66667	3.57143	Retouched flake	triangular prism	angular	no	fine-grained	1	Fe_Ex12	One	Long	3 - Exhausted	Perpendicular, oblique	bladelet	Delpiano	Hammer1	Anvil2_Cantina	Hard	513
3	Fe_Ex12	Integer	Integer	16	6	2.66667	2	Production	Bladelet	0		Triangular	Rectilinear	Hinged			1-Unidirectional	Direct	Ferrara	19	Fe12	Chert	50	30	14	18.5	1.66667	3.57143	Retouched flake	triangular prism	angular	no	fine-grained	1	Fe_Ex12	One	Long	3 - Exhausted	Perpendicular, oblique	bladelet	Delpiano	Hammer1	Anvil2_Cantina	Hard	513
4	Fe_Ex12	Fragmented	Mesial	14	7	2	5	Production	Spall	0		Triangular	Concave	Broken			5-Perpendicular	Direct	Ferrara	19	Fe12	Chert	50	30	14	18.5	1.66667	3.57143	Retouched flake	triangular prism	angular	no	fine-grained	1	Fe_Ex12	One	Long	3 - Exhausted	Perpendicular, oblique	bladelet	Delpiano	Hammer1	Anvil2_Cantina	Hard	513
5	Fe_Ex12	Fragmented	Distal	21	11	1.90909	8	Production	Spall	0		Rectangular triangle	Wavy	Broken			5-Perpendicular	Direct	Ferrara	19	Fe12	Chert	50	30	14	18.5	1.66667	3.57143	Retouched flake	triangular prism	angular	no	fine-grained	1	Fe_Ex12	One	Long	3 - Exhausted	Perpendicular, oblique	bladelet	Delpiano	Hammer1	Anvil2_Cantina	Hard	513
6	Fe_Ex12	Integer	Integer	21	4	5.25	3	Production	Spall	0		Rectangular triangle	Concave	Feather			2-Bidirectional	Direct	Ferrara	19	Fe12	Chert	50	30	14	18.5	1.66667	3.57143	Retouched flake	triangular prism	angular	no	fine-grained	1	Fe_Ex12	One	Long	3 - Exhausted	Perpendicular, oblique	bladelet	Delpiano	Hammer1	Anvil2_Cantina	Hard	513
7	Fe_Ex12	Integer	Integer	19	3	6.33333	3	Production	Spall	0		Triangular	Twisted	Hinged			1-Unidirectional	Anvil	Ferrara	19	Fe12	Chert	50	30	14	18.5	1.66667	3.57143	Retouched flake	triangular prism	angular	no	fine-grained	1	Fe_Ex12	One	Long	3 - Exhausted	Perpendicular, oblique	bladelet	Delpiano	Hammer1	Anvil2_Cantina	Hard	513
8	Fe_Ex12	Fragmented	Proximal	15	14	1.07143	3	Production	Blade	0		Triangular	Rectilinear	Broken			1-Unidirectional	Anvil	Ferrara	19	Fe12	Chert	50	30	14	18.5	1.66667	3.57143	Retouched flake	triangular prism	angular	no	fine-grained	1	Fe_Ex12	One	Long	3 - Exhausted	Perpendicular, oblique	bladelet	Delpiano	Hammer1	Anvil2_Cantina	Hard	513
9	Fe_Ex12	Fragmented	Mesial	14	9	1.55556	4	Production	Bladelet	0		Triangular	Rectilinear	Broken			Indet	Anvil	Ferrara	19	Fe12	Chert	50	30	14	18.5	1.66667	3.57143	Retouched flake	triangular prism	angular	no	fine-grained	1	Fe_Ex12	One	Long	3 - Exhausted	Perpendicular, oblique	bladelet	Delpiano	Hammer1	Anvil2_Cantina	Hard	513
10	Fe_Ex12	Fragmented	Meso-Proximal	22	12	1.83333	5	Production	Flake	0		Trapeze	Rectilinear	Broken			2-Bidirectional	Direct	Ferrara	19	Fe12	Chert	50	30	14	18.5	1.66667	3.57143	Retouched flake	triangular prism	angular	no	fine-grained	1	Fe_Ex12	One	Long	3 - Exhausted	Perpendicular, oblique	bladelet	Delpiano	Hammer1	Anvil2_Cantina	Hard	513
11	Fe_Ex12	Integer	Integer	15	15	1	2	Production	Flake	0		Linear	Rectilinear	Hinged			1-Unidirectional	Anvil	Ferrara	19	Fe12	Chert	50	30	14	18.5	1.66667	3.57143	Retouched flake	triangular prism	angular	no	fine-grained	1	Fe_Ex12	One	Long	3 - Exhausted	Perpendicular, oblique	bladelet	Delpiano	Hammer1	Anvil2_Cantina	Hard	513
12	Fe_Ex12	Integer	Integer	13	11	1.18182	1	Production	Flake	0		Linear	Rectilinear	Hinged			1-Unidirectional	Anvil	Ferrara	19	Fe12	Chert	50	30	14	18.5	1.66667	3.57143	Retouched flake	triangular prism	angular	no	fine-grained	1	Fe_Ex12	One	Long	3 - Exhausted	Perpendicular, oblique	bladelet	Delpiano	Hammer1	Anvil2_Cantina	Hard	513
13	Fe_Ex12	Integer	Integer	8	17	0.470588	2	Production	Flake	0		Linear	Convex	Hinged			1-Unidirectional		Ferrara	19	Fe12	Chert	50	30	14	18.5	1.66667	3.57143	Retouched flake	triangular prism	angular	no	fine-grained	1	Fe_Ex12	One	Long	3 - Exhausted	Perpendicular, oblique	bladelet	Delpiano	Hammer1	Anvil2_Cantina	Hard	513
14	Fe_Ex12	Fragmented	Composite	14	9	1.55556	3	Production	Chunk	0		Trapeze	Convex	Feather			Indet		Ferrara	19	Fe12	Chert	50	30	14	18.5	1.66667	3.57143	Retouched flake	triangular prism	angular	no	fine-grained	1	Fe_Ex12	One	Long	3 - Exhausted	Perpendicular, oblique	bladelet	Delpiano	Hammer1	Anvil2_Cantina	Hard	513
15	Fe_Ex12	Integer	Integer	11	12	0.916667	2	Production	Flake	0		Linear	Rectilinear	Hinged			1-Unidirectional	Anvil	Ferrara	19	Fe12	Chert	50	30	14	18.5	1.66667	3.57143	Retouched flake	triangular prism	angular	no	fine-grained	1	Fe_Ex12	One	Long	3 - Exhausted	Perpendicular, oblique	bladelet	Delpiano	Hammer1	Anvil2_Cantina	Hard	513
16	Fe_Ex12	Integer	Integer	12	9	1.33333	2	Production	Flake	0		Linear	Rectilinear	Hinged			Indet		Ferrara	19	Fe12	Chert	50	30	14	18.5	1.66667	3.57143	Retouched flake	triangular prism	angular	no	fine-grained	1	Fe_Ex12	One	Long	3 - Exhausted	Perpendicular, oblique	bladelet	Delpiano	Hammer1	Anvil2_Cantina	Hard	513
17	Fe_Ex12	Integer	Integer	10	9	1.11111	1	Production	Flake	0		Linear	Rectilinear	Hinged			1-Unidirectional		Ferrara	19	Fe12	Chert	50	30	14	18.5	1.66667	3.57143	Retouched flake	triangular prism	angular	no	fine-grained	1	Fe_Ex12	One	Long	3 - Exhausted	Perpendicular, oblique	bladelet	Delpiano	Hammer1	Anvil2_Cantina	Hard	513
18	Fe_Ex12	Fragmented	Composite	13	8	1.625	3	Production	Chunk	0		Rectangular triangle	Concave	Feather			Indet		Ferrara	19	Fe12	Chert	50	30	14	18.5	1.66667	3.57143	Retouched flake	triangular prism	angular	no	fine-grained	1	Fe_Ex12	One	Long	3 - Exhausted	Perpendicular, oblique	bladelet	Delpiano	Hammer1	Anvil2_Cantina	Hard	513
0	Fe_Ex13	Integer	Integer	33	20	1.65	9	Final	Core	76-99	Semi-total	Trapeze			flatparalelepiped	1	1-Unidirectional		Ferrara	5	Fe13	Chert	39	41	10	12.8	0.95122	3.9	Retouched flake	Polyhedron	angular	no	fine-grained	1	Fe_Ex13	One	Same length	2 - Medium	Perpendicular	bladelet	Delpiano	Hammer1	Anvil2_Cantina	Hard	513
1	Fe_Ex13	Fragmented	Meso-Proximal	29	5	5.8	7	Production	Spall	26-50	Lateral	Trapeze	Wavy	Broken			5-Perpendicular	Direct	Ferrara	5	Fe13	Chert	39	41	10	12.8	0.95122	3.9	Retouched flake	Polyhedron	angular	no	fine-grained	1	Fe_Ex13	One	Same length	2 - Medium	Perpendicular	bladelet	Delpiano	Hammer1	Anvil2_Cantina	Hard	513
2	Fe_Ex13	Fragmented	Distal	10	8	1.25	3	Production	Spall	1-25	Lateral	Trapeze	Rectilinear	Plunging			5-Perpendicular	Direct	Ferrara	5	Fe13	Chert	39	41	10	12.8	0.95122	3.9	Retouched flake	Polyhedron	angular	no	fine-grained	1	Fe_Ex13	One	Same length	2 - Medium	Perpendicular	bladelet	Delpiano	Hammer1	Anvil2_Cantina	Hard	513
3	Fe_Ex13	Integer	Integer	35	20	1.75	7	Production	Flake	1-25	Distal	Triangular	Concave	Feather			5-Perpendicular	Direct	Ferrara	5	Fe13	Chert	39	41	10	12.8	0.95122	3.9	Retouched flake	Polyhedron	angular	no	fine-grained	1	Fe_Ex13	One	Same length	2 - Medium	Perpendicular	bladelet	Delpiano	Hammer1	Anvil2_Cantina	Hard	513
4	Fe_Ex13	Integer	Integer	16	11	1.45455	1	Production	Flake	0		Rectangular triangle	Rectilinear	Hinged			Indet		Ferrara	5	Fe13	Chert	39	41	10	12.8	0.95122	3.9	Retouched flake	Polyhedron	angular	no	fine-grained	1	Fe_Ex13	One	Same length	2 - Medium	Perpendicular	bladelet	Delpiano	Hammer1	Anvil2_Cantina	Hard	513
0a	Fe_Ex14a	Integer	Integer	22	11	2	6	Final	Core	0		Irregular			flatparalelepiped	4	2-Bidirectional		Ferrara	19	Fe14a	Chert	54	28	15	25.9	1.92857	3.6	Retouched flake	truncated pyramid/frustum	angular	no	fine-grained	2	Fe_Ex14a, Fe_Ex14b	One	Long	3 - Exhausted	Perpendicular, oblique	bladelet	Delpiano	Hammer1	Anvil2_Cantina	Hard	513
0b	Fe_Ex14b	Integer	Integer	24	9	2.66667	9	Final	Core	0		Irregular			flatparalelepiped	4	2-Bidirectional		Ferrara	11	Fe14b	Chert	54	28	15	25.9	1.92857	3.6	Retouched flake	truncated pyramid/frustum	angular	no	fine-grained	2	Fe_Ex14a, Fe_Ex14b	One	Long	3 - Exhausted	Perpendicular, oblique	bladelet	Delpiano	Hammer1	Anvil2_Cantina	Hard	513
0c	Fe_Ex14b	Integer	Integer	19	9	2.11111	5	Final	Core	0		Trapeze			flatparalelepiped	4	2-Bidirectional		Ferrara	11	Fe14b	Chert	54	28	15	25.9	1.92857	3.6	Retouched flake	truncated pyramid/frustum	angular	no	fine-grained	2	Fe_Ex14a, Fe_Ex14b	One	Long	3 - Exhausted	Perpendicular, oblique	bladelet	Delpiano	Hammer1	Anvil2_Cantina	Hard	513
1	Fe_Ex14	Integer	Integer	17	9	1.88889	2	Production	Flake	0		Linear	Rectilinear	Feather			Indet		Ferrara	19	Fe14a	Chert	54	28	15	25.9	1.92857	3.6	Retouched flake	truncated pyramid/frustum	angular	no	fine-grained	2	Fe_Ex14a, Fe_Ex14b	One	Long	3 - Exhausted	Perpendicular, oblique	bladelet	Delpiano	Hammer1	Anvil2_Cantina	Hard	513
2	Fe_Ex14	Integer	Integer	10	14	0.714286	2	Production	Flake	0		Linear	Convex	Hinged			1-Unidirectional		Ferrara	19	Fe14a	Chert	54	28	15	25.9	1.92857	3.6	Retouched flake	truncated pyramid/frustum	angular	no	fine-grained	2	Fe_Ex14a, Fe_Ex14b	One	Long	3 - Exhausted	Perpendicular, oblique	bladelet	Delpiano	Hammer1	Anvil2_Cantina	Hard	513
3	Fe_Ex14	Integer	Integer	17	4	4.25	1	Production	Bladelet	1-25	Proximal	Triangular	Twisted	Feather			1-Unidirectional		Ferrara	19	Fe14a	Chert	54	28	15	25.9	1.92857	3.6	Retouched flake	truncated pyramid/frustum	angular	no	fine-grained	2	Fe_Ex14a, Fe_Ex14b	One	Long	3 - Exhausted	Perpendicular, oblique	bladelet	Delpiano	Hammer1	Anvil2_Cantina	Hard	513
4	Fe_Ex14a	Fragmented	Composite	16	12	1.33333	7	Production	Chunk	0		Irregular		Broken			Indet		Ferrara	19	Fe14a	Chert	54	28	15	25.9	1.92857	3.6	Retouched flake	truncated pyramid/frustum	angular	no	fine-grained	2	Fe_Ex14a, Fe_Ex14b	One	Long	3 - Exhausted	Perpendicular, oblique	bladelet	Delpiano	Hammer1	Anvil2_Cantina	Hard	513
5	Fe_Ex14a	Fragmented	Mesial	14	10	1.4	3	Production	Flake	0		Triangular	Wavy	Broken			Indet		Ferrara	19	Fe14a	Chert	54	28	15	25.9	1.92857	3.6	Retouched flake	truncated pyramid/frustum	angular	no	fine-grained	2	Fe_Ex14a, Fe_Ex14b	One	Long	3 - Exhausted	Perpendicular, oblique	bladelet	Delpiano	Hammer1	Anvil2_Cantina	Hard	513
6	Fe_Ex14a	Integer	Integer	15	3	5	1	Production	Bladelet	0		Triangular	Twisted	Hinged			Indet		Ferrara	19	Fe14a	Chert	54	28	15	25.9	1.92857	3.6	Retouched flake	truncated pyramid/frustum	angular	no	fine-grained	2	Fe_Ex14a, Fe_Ex14b	One	Long	3 - Exhausted	Perpendicular, oblique	bladelet	Delpiano	Hammer1	Anvil2_Cantina	Hard	513
7	Fe_Ex14a	Fragmented	Meso-Proximal	27	12	2.25	4	Production	Bladelet	0		Triangular	Concave	Broken			1-Unidirectional		Ferrara	19	Fe14a	Chert	54	28	15	25.9	1.92857	3.6	Retouched flake	truncated pyramid/frustum	angular	no	fine-grained	2	Fe_Ex14a, Fe_Ex14b	One	Long	3 - Exhausted	Perpendicular, oblique	bladelet	Delpiano	Hammer1	Anvil2_Cantina	Hard	513
8	Fe_Ex14a	Fragmented	Meso-Proximal	14	5	2.8	2	Production	Bladelet	0		Triangular	Concave	Broken			2-Bidirectional		Ferrara	19	Fe14a	Chert	54	28	15	25.9	1.92857	3.6	Retouched flake	truncated pyramid/frustum	angular	no	fine-grained	2	Fe_Ex14a, Fe_Ex14b	One	Long	3 - Exhausted	Perpendicular, oblique	bladelet	Delpiano	Hammer1	Anvil2_Cantina	Hard	513
9	Fe_Ex14a	Fragmented	Mesial	11	4	2.75	3	Production	Bladelet	0		Triangular	Concave	Broken			2-Bidirectional		Ferrara	19	Fe14a	Chert	54	28	15	25.9	1.92857	3.6	Retouched flake	truncated pyramid/frustum	angular	no	fine-grained	2	Fe_Ex14a, Fe_Ex14b	One	Long	3 - Exhausted	Perpendicular, oblique	bladelet	Delpiano	Hammer1	Anvil2_Cantina	Hard	513
10	Fe_Ex14a	Integer	Integer	22	6	3.66667	3	Production	Bladelet	0		Triangular	Wavy	Plunging			2-Bidirectional		Ferrara	19	Fe14a	Chert	54	28	15	25.9	1.92857	3.6	Retouched flake	truncated pyramid/frustum	angular	no	fine-grained	2	Fe_Ex14a, Fe_Ex14b	One	Long	3 - Exhausted	Perpendicular, oblique	bladelet	Delpiano	Hammer1	Anvil2_Cantina	Hard	513
11	Fe_Ex14a	Integer	Integer	17	4	4.25	1	Production	Bladelet	0		Linear	Concave	Feather			2-Bidirectional		Ferrara	19	Fe14a	Chert	54	28	15	25.9	1.92857	3.6	Retouched flake	truncated pyramid/frustum	angular	no	fine-grained	2	Fe_Ex14a, Fe_Ex14b	One	Long	3 - Exhausted	Perpendicular, oblique	bladelet	Delpiano	Hammer1	Anvil2_Cantina	Hard	513
12	Fe_Ex14a	Fragmented	Meso-Proximal	15	6	2.5	5	Production	Spall	0		Rectangular Trapeze	Twisted	Broken			1-Unidirectional		Ferrara	19	Fe14a	Chert	54	28	15	25.9	1.92857	3.6	Retouched flake	truncated pyramid/frustum	angular	no	fine-grained	2	Fe_Ex14a, Fe_Ex14b	One	Long	3 - Exhausted	Perpendicular, oblique	bladelet	Delpiano	Hammer1	Anvil2_Cantina	Hard	513
13	Fe_Ex14a	Fragmented	Mesial	14	7	2	4	Production	Spall	0		Rectangular Trapeze	Concave	Broken			2-Bidirectional		Ferrara	19	Fe14a	Chert	54	28	15	25.9	1.92857	3.6	Retouched flake	truncated pyramid/frustum	angular	no	fine-grained	2	Fe_Ex14a, Fe_Ex14b	One	Long	3 - Exhausted	Perpendicular, oblique	bladelet	Delpiano	Hammer1	Anvil2_Cantina	Hard	513
14	Fe_Ex14a	Fragmented	Mesial	14	4	3.5	7	Production	Spall	0		Triangular	Twisted	Broken			2-Bidirectional		Ferrara	19	Fe14a	Chert	54	28	15	25.9	1.92857	3.6	Retouched flake	truncated pyramid/frustum	angular	no	fine-grained	2	Fe_Ex14a, Fe_Ex14b	One	Long	3 - Exhausted	Perpendicular, oblique	bladelet	Delpiano	Hammer1	Anvil2_Cantina	Hard	513
15	Fe_Ex14a	Fragmented	Meso-Proximal	15	7	2.14286	3	Production	Spall	1-25	Proximal	Rectangular triangle	Rectilinear	Broken			5-Perpendicular		Ferrara	19	Fe14a	Chert	54	28	15	25.9	1.92857	3.6	Retouched flake	truncated pyramid/frustum	angular	no	fine-grained	2	Fe_Ex14a, Fe_Ex14b	One	Long	3 - Exhausted	Perpendicular, oblique	bladelet	Delpiano	Hammer1	Anvil2_Cantina	Hard	513
16	Fe_Ex14a	Fragmented	Meso-Distal	18	4	4.5	3	Production	Spall	0		Trapeze	Convex	Hinged			1-Unidirectional		Ferrara	19	Fe14a	Chert	54	28	15	25.9	1.92857	3.6	Retouched flake	truncated pyramid/frustum	angular	no	fine-grained	2	Fe_Ex14a, Fe_Ex14b	One	Long	3 - Exhausted	Perpendicular, oblique	bladelet	Delpiano	Hammer1	Anvil2_Cantina	Hard	513
17	Fe_Ex14b	Fragmented	Meso-Distal	15	4	3.75	3	Production	Spall	0		Triangular	Concave	Plunging			1-Unidirectional		Ferrara	11	Fe14b	Chert	54	28	15	25.9	1.92857	3.6	Retouched flake	truncated pyramid/frustum	angular	no	fine-grained	2	Fe_Ex14a, Fe_Ex14b	One	Long	3 - Exhausted	Perpendicular, oblique	bladelet	Delpiano	Hammer1	Anvil2_Cantina	Hard	513
18	Fe_Ex14a	Integer	Integer	29	7	4.14286	5	Production	Spall	0		Trapeze	Wavy	Hinged			1-Unidirectional		Ferrara	19	Fe14a	Chert	54	28	15	25.9	1.92857	3.6	Retouched flake	truncated pyramid/frustum	angular	no	fine-grained	2	Fe_Ex14a, Fe_Ex14b	One	Long	3 - Exhausted	Perpendicular, oblique	bladelet	Delpiano	Hammer1	Anvil2_Cantina	Hard	513
19	Fe_Ex14a	Integer	Integer	18	2	9	1	Production	Spall	0		Triangular	Concave	Feather			5-Perpendicular		Ferrara	19	Fe14a	Chert	54	28	15	25.9	1.92857	3.6	Retouched flake	truncated pyramid/frustum	angular	no	fine-grained	2	Fe_Ex14a, Fe_Ex14b	One	Long	3 - Exhausted	Perpendicular, oblique	bladelet	Delpiano	Hammer1	Anvil2_Cantina	Hard	513
20	Fe_Ex14b	Integer	Integer	19	15	1.26667	6	Production	Flake	0		Linear	Concave	Feather			Indet		Ferrara	11	Fe14b	Chert	54	28	15	25.9	1.92857	3.6	Retouched flake	truncated pyramid/frustum	angular	no	fine-grained	2	Fe_Ex14a, Fe_Ex14b	One	Long	3 - Exhausted	Perpendicular, oblique	bladelet	Delpiano	Hammer1	Anvil2_Cantina	Hard	513
21	Fe_Ex14b	Fragmented	Proximal	15	14	1.07143	2	Production	Flake	0		Linear	Rectilinear	Hinged			1-Unidirectional		Ferrara	11	Fe14b	Chert	54	28	15	25.9	1.92857	3.6	Retouched flake	truncated pyramid/frustum	angular	no	fine-grained	2	Fe_Ex14a, Fe_Ex14b	One	Long	3 - Exhausted	Perpendicular, oblique	bladelet	Delpiano	Hammer1	Anvil2_Cantina	Hard	513
22	Fe_Ex14b	Fragmented	Meso-Distal	26	11	2.36364	5	Production	Bladelet	0		Trapeze	Concave	Plunging			2-Bidirectional		Ferrara	11	Fe14b	Chert	54	28	15	25.9	1.92857	3.6	Retouched flake	truncated pyramid/frustum	angular	no	fine-grained	2	Fe_Ex14a, Fe_Ex14b	One	Long	3 - Exhausted	Perpendicular, oblique	bladelet	Delpiano	Hammer1	Anvil2_Cantina	Hard	513
23	Fe_Ex14b	Integer	Integer	23	5	4.6	3	Production	Bladelet	0		Triangular	Wavy	Feather			1-Unidirectional		Ferrara	11	Fe14b	Chert	54	28	15	25.9	1.92857	3.6	Retouched flake	truncated pyramid/frustum	angular	no	fine-grained	2	Fe_Ex14a, Fe_Ex14b	One	Long	3 - Exhausted	Perpendicular, oblique	bladelet	Delpiano	Hammer1	Anvil2_Cantina	Hard	513
24	Fe_Ex14b	Fragmented	Meso-Distal	15	4	3.75	3	Production	Bladelet	0		Triangular	Concave	Plunging			2-Bidirectional		Ferrara	11	Fe14b	Chert	54	28	15	25.9	1.92857	3.6	Retouched flake	truncated pyramid/frustum	angular	no	fine-grained	2	Fe_Ex14a, Fe_Ex14b	One	Long	3 - Exhausted	Perpendicular, oblique	bladelet	Delpiano	Hammer1	Anvil2_Cantina	Hard	513
25	Fe_Ex14b	Integer	Integer	19	7	2.71429	2	Production	Spall	0		Rectangular triangle	Wavy	Hinged			5-Perpendicular		Ferrara	11	Fe14b	Chert	54	28	15	25.9	1.92857	3.6	Retouched flake	truncated pyramid/frustum	angular	no	fine-grained	2	Fe_Ex14a, Fe_Ex14b	One	Long	3 - Exhausted	Perpendicular, oblique	bladelet	Delpiano	Hammer1	Anvil2_Cantina	Hard	513
26	Fe_Ex14b	Integer	Integer	22	5	4.4	2	Production	Spall	0		Trapeze	Rectilinear	Feather			2-Bidirectional		Ferrara	11	Fe14b	Chert	54	28	15	25.9	1.92857	3.6	Retouched flake	truncated pyramid/frustum	angular	no	fine-grained	2	Fe_Ex14a, Fe_Ex14b	One	Long	3 - Exhausted	Perpendicular, oblique	bladelet	Delpiano	Hammer1	Anvil2_Cantina	Hard	513
27	Fe_Ex14b	Integer	Integer	20	6	3.33333	6	Production	Spall	0		Triangular	Wavy	Feather			1-Unidirectional		Ferrara	11	Fe14b	Chert	54	28	15	25.9	1.92857	3.6	Retouched flake	truncated pyramid/frustum	angular	no	fine-grained	2	Fe_Ex14a, Fe_Ex14b	One	Long	3 - Exhausted	Perpendicular, oblique	bladelet	Delpiano	Hammer1	Anvil2_Cantina	Hard	513
0	Fe_Ex15	Integer	Integer	20	11	1.81818	6	Final	Core	0		Irregular			Flat	4	2-Bidirectional		Ferrara	16	Fe15	Chert	42	20	12	9.2	2.1	3.5	Retouched flake	triangular prism	angular	no	fine-grained	1	Fe_Ex15	One	Long	3 - Exhausted	Perpendicular, oblique	bladelet	Delpiano	Hammer1	Anvil2_Cantina	Hard	513
1	Fe_Ex15	Integer	Integer	21	6	3.5	3	Production	Spall	0		Triangular	Concave	Plunging			5-Perpendicular		Ferrara	16	Fe15	Chert	42	20	12	9.2	2.1	3.5	Retouched flake	triangular prism	angular	no	fine-grained	1	Fe_Ex15	One	Long	3 - Exhausted	Perpendicular, oblique	bladelet	Delpiano	Hammer1	Anvil2_Cantina	Hard	513
2	Fe_Ex15	Fragmented	Meso-Proximal	15	3	5	2	Production	Spall	0		Rectangular triangle	Twisted	Broken			2-Bidirectional	Anvil	Ferrara	16	Fe15	Chert	42	20	12	9.2	2.1	3.5	Retouched flake	triangular prism	angular	no	fine-grained	1	Fe_Ex15	One	Long	3 - Exhausted	Perpendicular, oblique	bladelet	Delpiano	Hammer1	Anvil2_Cantina	Hard	513
3	Fe_Ex15	Fragmented	Mesial	11	5	2.2	2	Production	Bladelet	0		Triangular	Rectilinear	Broken			Indet		Ferrara	16	Fe15	Chert	42	20	12	9.2	2.1	3.5	Retouched flake	triangular prism	angular	no	fine-grained	1	Fe_Ex15	One	Long	3 - Exhausted	Perpendicular, oblique	bladelet	Delpiano	Hammer1	Anvil2_Cantina	Hard	513
4	Fe_Ex15	Fragmented	Mesial	20	5	4	2	Production	Spall	0		Triangular	Concave	Broken			1-Unidirectional	Direct	Ferrara	16	Fe15	Chert	42	20	12	9.2	2.1	3.5	Retouched flake	triangular prism	angular	no	fine-grained	1	Fe_Ex15	One	Long	3 - Exhausted	Perpendicular, oblique	bladelet	Delpiano	Hammer1	Anvil2_Cantina	Hard	513
5	Fe_Ex15	Fragmented	Meso-Proximal	29	10	2.9	6	Production	Spall	0		Triangular	Concave	Broken			1-Unidirectional	Direct	Ferrara	16	Fe15	Chert	42	20	12	9.2	2.1	3.5	Retouched flake	triangular prism	angular	no	fine-grained	1	Fe_Ex15	One	Long	3 - Exhausted	Perpendicular, oblique	bladelet	Delpiano	Hammer1	Anvil2_Cantina	Hard	513
6	Fe_Ex15	Fragmented	Mesial	17	7	2.42857	5	Production	Spall	0		Rectangular Trapeze	Concave	Broken			1-Unidirectional		Ferrara	16	Fe15	Chert	42	20	12	9.2	2.1	3.5	Retouched flake	triangular prism	angular	no	fine-grained	1	Fe_Ex15	One	Long	3 - Exhausted	Perpendicular, oblique	bladelet	Delpiano	Hammer1	Anvil2_Cantina	Hard	513
7	Fe_Ex15	Fragmented	Meso-Proximal	15	7	2.14286	2	Production	Spall	0		Trapeze	Rectilinear	Broken			1-Unidirectional	Direct	Ferrara	16	Fe15	Chert	42	20	12	9.2	2.1	3.5	Retouched flake	triangular prism	angular	no	fine-grained	1	Fe_Ex15	One	Long	3 - Exhausted	Perpendicular, oblique	bladelet	Delpiano	Hammer1	Anvil2_Cantina	Hard	513
8	Fe_Ex15	Integer	Integer	12	5	2.4	2	Production	Bladelet	0		Trapeze	Concave	Feather			1-Unidirectional	Anvil	Ferrara	16	Fe15	Chert	42	20	12	9.2	2.1	3.5	Retouched flake	triangular prism	angular	no	fine-grained	1	Fe_Ex15	One	Long	3 - Exhausted	Perpendicular, oblique	bladelet	Delpiano	Hammer1	Anvil2_Cantina	Hard	513
9	Fe_Ex15	Integer	Integer	19	6	3.16667	2	Production	Bladelet	0		Triangular	Concave	Feather			2-Bidirectional		Ferrara	16	Fe15	Chert	42	20	12	9.2	2.1	3.5	Retouched flake	triangular prism	angular	no	fine-grained	1	Fe_Ex15	One	Long	3 - Exhausted	Perpendicular, oblique	bladelet	Delpiano	Hammer1	Anvil2_Cantina	Hard	513
10	Fe_Ex15	Fragmented	Mesial	14	7	2	3	Production	Bladelet	0		Triangular	Concave	Broken			5-Perpendicular		Ferrara	16	Fe15	Chert	42	20	12	9.2	2.1	3.5	Retouched flake	triangular prism	angular	no	fine-grained	1	Fe_Ex15	One	Long	3 - Exhausted	Perpendicular, oblique	bladelet	Delpiano	Hammer1	Anvil2_Cantina	Hard	513
11	Fe_Ex15	Integer	Integer	15	15	1	6	Production	Flake	0		Trapeze	Rectilinear	Hinged			2-Bidirectional		Ferrara	16	Fe15	Chert	42	20	12	9.2	2.1	3.5	Retouched flake	triangular prism	angular	no	fine-grained	1	Fe_Ex15	One	Long	3 - Exhausted	Perpendicular, oblique	bladelet	Delpiano	Hammer1	Anvil2_Cantina	Hard	513
12	Fe_Ex15	Fragmented	Mesial	14	11	1.27273	4	Production	Bladelet	0		Trapeze	Concave	Broken			1-Unidirectional		Ferrara	16	Fe15	Chert	42	20	12	9.2	2.1	3.5	Retouched flake	triangular prism	angular	no	fine-grained	1	Fe_Ex15	One	Long	3 - Exhausted	Perpendicular, oblique	bladelet	Delpiano	Hammer1	Anvil2_Cantina	Hard	513
13	Fe_Ex15	Fragmented	Mesial	11	4	2.75	3	Production	Spall	0		Triangular	Wavy	Broken			2-Bidirectional		Ferrara	16	Fe15	Chert	42	20	12	9.2	2.1	3.5	Retouched flake	triangular prism	angular	no	fine-grained	1	Fe_Ex15	One	Long	3 - Exhausted	Perpendicular, oblique	bladelet	Delpiano	Hammer1	Anvil2_Cantina	Hard	513
14	Fe_Ex15	Integer	Integer	11	7	1.57143	1	Production	Flake	0		Linear	Rectilinear	Feather			5-Perpendicular		Ferrara	16	Fe15	Chert	42	20	12	9.2	2.1	3.5	Retouched flake	triangular prism	angular	no	fine-grained	1	Fe_Ex15	One	Long	3 - Exhausted	Perpendicular, oblique	bladelet	Delpiano	Hammer1	Anvil2_Cantina	Hard	513
15	Fe_Ex15	Fragmented	Composite	18	6	3	1	Production	Chunk	0		Linear	Concave	Feather			Indet		Ferrara	16	Fe15	Chert	42	20	12	9.2	2.1	3.5	Retouched flake	triangular prism	angular	no	fine-grained	1	Fe_Ex15	One	Long	3 - Exhausted	Perpendicular, oblique	bladelet	Delpiano	Hammer1	Anvil2_Cantina	Hard	513
0	Fe_Ex16	Integer	Integer	21	18	1.16667	5	Final	Core	0		Irregular			Flat	2	2-Bidirectional		Ferrara	9	Fe16	Chert	37	34	9	9.3	1.08824	4.11111	Flake	flat	angular	no	fine-grained	1	Fe_Ex16	Two	Same length	3 - Exhausted	Perpendicular	flake	Delpiano	Hammer1	Anvil2_Cantina	Hard	513
1	Fe_Ex16	Fragmented	Meso-Distal	12	9	1.33333	3	Production	Flake	0		Triangular	Wavy	Broken			Indet		Ferrara	9	Fe16	Chert	37	34	9	9.3	1.08824	4.11111	Flake	flat	angular	no	fine-grained	1	Fe_Ex16	Two	Same length	3 - Exhausted	Perpendicular	flake	Delpiano	Hammer1	Anvil2_Cantina	Hard	513
2	Fe_Ex16	Fragmented	Distal	20	11	1.81818	4	Production	Flake	0		Triangular	Convex	Hinged			1-Unidirectional		Ferrara	9	Fe16	Chert	37	34	9	9.3	1.08824	4.11111	Flake	flat	angular	no	fine-grained	1	Fe_Ex16	Two	Same length	3 - Exhausted	Perpendicular	flake	Delpiano	Hammer1	Anvil2_Cantina	Hard	513
3	Fe_Ex16	Integer	Integer	12	14	0.857143	2	Production	Flake	0		Linear	Rectilinear	Hinged			1-Unidirectional		Ferrara	9	Fe16	Chert	37	34	9	9.3	1.08824	4.11111	Flake	flat	angular	no	fine-grained	1	Fe_Ex16	Two	Same length	3 - Exhausted	Perpendicular	flake	Delpiano	Hammer1	Anvil2_Cantina	Hard	513
4	Fe_Ex16	Integer	Integer	21	16	1.3125	3	Production	Flake	0		Rectangular triangle	Wavy	Feather			1-Unidirectional		Ferrara	9	Fe16	Chert	37	34	9	9.3	1.08824	4.11111	Flake	flat	angular	no	fine-grained	1	Fe_Ex16	Two	Same length	3 - Exhausted	Perpendicular	flake	Delpiano	Hammer1	Anvil2_Cantina	Hard	513
5	Fe_Ex16	Fragmented	Mesial	15	6	2.5	2	Production	Bladelet	0		Triangular	Rectilinear	Broken			Indet		Ferrara	9	Fe16	Chert	37	34	9	9.3	1.08824	4.11111	Flake	flat	angular	no	fine-grained	1	Fe_Ex16	Two	Same length	3 - Exhausted	Perpendicular	flake	Delpiano	Hammer1	Anvil2_Cantina	Hard	513
6	Fe_Ex16	Integer	Integer	9	13	0.692308	1	Production	Flake	0		Linear	Rectilinear	Hinged			1-Unidirectional		Ferrara	9	Fe16	Chert	37	34	9	9.3	1.08824	4.11111	Flake	flat	angular	no	fine-grained	1	Fe_Ex16	Two	Same length	3 - Exhausted	Perpendicular	flake	Delpiano	Hammer1	Anvil2_Cantina	Hard	513
7	Fe_Ex16	Fragmented	Distal	7	14	0.5	2	Production	Flake	0		Linear	Convex	Hinged			Indet		Ferrara	9	Fe16	Chert	37	34	9	9.3	1.08824	4.11111	Flake	flat	angular	no	fine-grained	1	Fe_Ex16	Two	Same length	3 - Exhausted	Perpendicular	flake	Delpiano	Hammer1	Anvil2_Cantina	Hard	513
8	Fe_Ex16	Fragmented	Distal	11	8	1.375	1	Production	Flake	0		Linear	Rectilinear	Feather			Indet		Ferrara	9	Fe16	Chert	37	34	9	9.3	1.08824	4.11111	Flake	flat	angular	no	fine-grained	1	Fe_Ex16	Two	Same length	3 - Exhausted	Perpendicular	flake	Delpiano	Hammer1	Anvil2_Cantina	Hard	513
0	Fe_Ex17	Integer	Integer	23	11	2.09091	4	Final	Core	0		Trapeze			Flat	2	2-Bidirectional		Ferrara	13	Fe17	Chert	41	36	9	12.7	1.13889	4.55556	Flake	Polyhedron	angular	no	fine-grained	1	Fe_Ex17	One	Long	3 - Exhausted	Perpendicular	bladelet	Delpiano	Hammer1	Anvil2_Cantina	Hard	513
1	Fe_Ex17	Integer	Integer	32	16	2	4	Production	Blade	1-25	Distal	Trapeze	Concave	Plunging			1-Unidirectional	Anvil	Ferrara	13	Fe17	Chert	41	36	9	12.7	1.13889	4.55556	Flake	Polyhedron	angular	no	fine-grained	1	Fe_Ex17	One	Long	3 - Exhausted	Perpendicular	bladelet	Delpiano	Hammer1	Anvil2_Cantina	Hard	513
2	Fe_Ex17	Integer	Integer	17	8	2.125	3	Production	Bladelet	0		Triangular	Wavy	Feather			1-Unidirectional		Ferrara	13	Fe17	Chert	41	36	9	12.7	1.13889	4.55556	Flake	Polyhedron	angular	no	fine-grained	1	Fe_Ex17	One	Long	3 - Exhausted	Perpendicular	bladelet	Delpiano	Hammer1	Anvil2_Cantina	Hard	513
3	Fe_Ex17	Integer	Integer	29	10	2.9	4	Production	Bladelet	0		Trapeze	Twisted	Plunging			1-Unidirectional	Anvil	Ferrara	13	Fe17	Chert	41	36	9	12.7	1.13889	4.55556	Flake	Polyhedron	angular	no	fine-grained	1	Fe_Ex17	One	Long	3 - Exhausted	Perpendicular	bladelet	Delpiano	Hammer1	Anvil2_Cantina	Hard	513
4	Fe_Ex17	Integer	Integer	24	11	2.18182	3	Production	Bladelet	0		Triangular	Concave	Feather			1-Unidirectional	Anvil	Ferrara	13	Fe17	Chert	41	36	9	12.7	1.13889	4.55556	Flake	Polyhedron	angular	no	fine-grained	1	Fe_Ex17	One	Long	3 - Exhausted	Perpendicular	bladelet	Delpiano	Hammer1	Anvil2_Cantina	Hard	513
5	Fe_Ex17	Integer	Integer	37	15	2.46667	7	Production	Spall	26-50	Lateral	Rectangular triangle	Wavy	Feather			Indet		Ferrara	13	Fe17	Chert	41	36	9	12.7	1.13889	4.55556	Flake	Polyhedron	angular	no	fine-grained	1	Fe_Ex17	One	Long	3 - Exhausted	Perpendicular	bladelet	Delpiano	Hammer1	Anvil2_Cantina	Hard	513
6	Fe_Ex17	Integer	Integer	24	5	4.8	4	Production	Spall	0		Rectangular triangle	Concave	Plunging			2-Bidirectional	Anvil	Ferrara	13	Fe17	Chert	41	36	9	12.7	1.13889	4.55556	Flake	Polyhedron	angular	no	fine-grained	1	Fe_Ex17	One	Long	3 - Exhausted	Perpendicular	bladelet	Delpiano	Hammer1	Anvil2_Cantina	Hard	513
7	Fe_Ex17	Integer	Integer	17	7	2.42857	6	Production	Spall	0		Rectangular triangle	Twisted	Feather			1-Unidirectional		Ferrara	13	Fe17	Chert	41	36	9	12.7	1.13889	4.55556	Flake	Polyhedron	angular	no	fine-grained	1	Fe_Ex17	One	Long	3 - Exhausted	Perpendicular	bladelet	Delpiano	Hammer1	Anvil2_Cantina	Hard	513
8	Fe_Ex17	Fragmented	Meso-Distal	14	5	2.8	4	Production	Spall	0		Trapeze	Twisted	Feather			1-Unidirectional	Direct	Ferrara	13	Fe17	Chert	41	36	9	12.7	1.13889	4.55556	Flake	Polyhedron	angular	no	fine-grained	1	Fe_Ex17	One	Long	3 - Exhausted	Perpendicular	bladelet	Delpiano	Hammer1	Anvil2_Cantina	Hard	513
9	Fe_Ex17	Fragmented	Meso-Distal	14	5	2.8	2	Production	Spall	0		Triangular	Twisted	Hinged			2-Bidirectional	Direct	Ferrara	13	Fe17	Chert	41	36	9	12.7	1.13889	4.55556	Flake	Polyhedron	angular	no	fine-grained	1	Fe_Ex17	One	Long	3 - Exhausted	Perpendicular	bladelet	Delpiano	Hammer1	Anvil2_Cantina	Hard	513
10	Fe_Ex17	Fragmented	Meso-Proximal	15	8	1.875	4	Production	Spall	0		Triangular	Rectilinear	Broken			2-Bidirectional		Ferrara	13	Fe17	Chert	41	36	9	12.7	1.13889	4.55556	Flake	Polyhedron	angular	no	fine-grained	1	Fe_Ex17	One	Long	3 - Exhausted	Perpendicular	bladelet	Delpiano	Hammer1	Anvil2_Cantina	Hard	513
11	Fe_Ex17	Integer	Integer	13	9	1.44444	1	Production	Flake	0		Linear	Concave	Feather			Indet		Ferrara	13	Fe17	Chert	41	36	9	12.7	1.13889	4.55556	Flake	Polyhedron	angular	no	fine-grained	1	Fe_Ex17	One	Long	3 - Exhausted	Perpendicular	bladelet	Delpiano	Hammer1	Anvil2_Cantina	Hard	513
12	Fe_Ex17	Integer	Integer	12	14	0.857143	3	Production	Flake	0		Linear	Concave	Hinged			1-Unidirectional		Ferrara	13	Fe17	Chert	41	36	9	12.7	1.13889	4.55556	Flake	Polyhedron	angular	no	fine-grained	1	Fe_Ex17	One	Long	3 - Exhausted	Perpendicular	bladelet	Delpiano	Hammer1	Anvil2_Cantina	Hard	513
0	Fe_Ex18	Fragmented	Meso-Proximal	17	19	0.894737	6	Final	Core	0		Irregular			flatparalelepiped	2	4-Multidirectional		Ferrara	8	Fe18	Chert	33	27	7	7.9	1.22222	4.71429	Flake	Polyhedron	angular	no	fine-grained	1	Fe_Ex18	Two	Long + Short	2 - Medium	Perpendicular	flake, bladelet	Delpiano	Hammer1	Anvil2_Cantina	Hard	513
0b	Fe_Ex18	Fragmented	Distal	13	19	0.684211	3	Final	Core	0		Rectangular Trapeze			Flat		4-Multidirectional		Ferrara	8	Fe18	Chert	33	27	7	7.9	1.22222	4.71429	Flake	Polyhedron	angular	no	fine-grained	1	Fe_Ex18	Two	Long + Short	2 - Medium	Perpendicular	flake, bladelet	Delpiano	Hammer1	Anvil2_Cantina	Hard	513
1	Fe_Ex18	Fragmented	Meso-Distal	16	7	2.28571	2	Production	Bladelet	0		Trapeze	Rectilinear	Feather			1-Unidirectional		Ferrara	8	Fe18	Chert	33	27	7	7.9	1.22222	4.71429	Flake	Polyhedron	angular	no	fine-grained	1	Fe_Ex18	Two	Long + Short	2 - Medium	Perpendicular	flake, bladelet	Delpiano	Hammer1	Anvil2_Cantina	Hard	513
2	Fe_Ex18	Integer	Integer	23	10	2.3	2	Production	Bladelet	0		Trapeze	Rectilinear	Feather			2-Bidirectional		Ferrara	8	Fe18	Chert	33	27	7	7.9	1.22222	4.71429	Flake	Polyhedron	angular	no	fine-grained	1	Fe_Ex18	Two	Long + Short	2 - Medium	Perpendicular	flake, bladelet	Delpiano	Hammer1	Anvil2_Cantina	Hard	513
3	Fe_Ex18	Integer	Integer	16	8	2	2	Production	Bladelet	0		Linear	Twisted	Feather			1-Unidirectional		Ferrara	8	Fe18	Chert	33	27	7	7.9	1.22222	4.71429	Flake	Polyhedron	angular	no	fine-grained	1	Fe_Ex18	Two	Long + Short	2 - Medium	Perpendicular	flake, bladelet	Delpiano	Hammer1	Anvil2_Cantina	Hard	513
4	Fe_Ex18	Integer	Integer	14	3	4.66667	1	Production	Bladelet	0		Linear	Rectilinear	Feather			Indet		Ferrara	8	Fe18	Chert	33	27	7	7.9	1.22222	4.71429	Flake	Polyhedron	angular	no	fine-grained	1	Fe_Ex18	Two	Long + Short	2 - Medium	Perpendicular	flake, bladelet	Delpiano	Hammer1	Anvil2_Cantina	Hard	513
5	Fe_Ex18	Integer	Integer	16	7	2.28571	1	Production	Bladelet	0		Trapeze	Concave	Feather			1-Unidirectional		Ferrara	8	Fe18	Chert	33	27	7	7.9	1.22222	4.71429	Flake	Polyhedron	angular	no	fine-grained	1	Fe_Ex18	Two	Long + Short	2 - Medium	Perpendicular	flake, bladelet	Delpiano	Hammer1	Anvil2_Cantina	Hard	513
6	Fe_Ex18	Fragmented	Meso-Distal	12	9	1.33333	1	Production	Flake	0		Linear	Convex	Hinged			Indet		Ferrara	8	Fe18	Chert	33	27	7	7.9	1.22222	4.71429	Flake	Polyhedron	angular	no	fine-grained	1	Fe_Ex18	Two	Long + Short	2 - Medium	Perpendicular	flake, bladelet	Delpiano	Hammer1	Anvil2_Cantina	Hard	513
0	Fe_Ex19	Integer	Integer	23	25	0.92	7	Final	Core	51-75	Semi-total	Half circles			Flat	2	2-Bidirectional		Ferrara	8	Fe19	Chert	51	28	10	18.1	1.82143	5.1	Retouched flake	triangular prism	angular	no	fine-grained	1	Fe_Ex19	One	Long	3 - Exhausted	Perpendicular	flake, bladelet	Delpiano	Hammer1	Anvil2_Cantina	Hard	513
1	Fe_Ex19	Fragmented	Composite	13	12	1.08333	2	Production	Chunk	0		Rectangular triangle	Rectilinear	Broken			Indet		Ferrara	8	Fe19	Chert	51	28	10	18.1	1.82143	5.1	Retouched flake	triangular prism	angular	no	fine-grained	1	Fe_Ex19	One	Long	3 - Exhausted	Perpendicular	flake, bladelet	Delpiano	Hammer1	Anvil2_Cantina	Hard	513
2	Fe_Ex19	Fragmented	Proximal	17	17	1	3	Production	Flake	0		Triangular	Rectilinear	Broken			1-Unidirectional		Ferrara	8	Fe19	Chert	51	28	10	18.1	1.82143	5.1	Retouched flake	triangular prism	angular	no	fine-grained	1	Fe_Ex19	One	Long	3 - Exhausted	Perpendicular	flake, bladelet	Delpiano	Hammer1	Anvil2_Cantina	Hard	513
3	Fe_Ex19	Fragmented	Proximal	15	15	1	3	Production	Flake	0		Linear	Rectilinear	Broken			1-Unidirectional		Ferrara	8	Fe19	Chert	51	28	10	18.1	1.82143	5.1	Retouched flake	triangular prism	angular	no	fine-grained	1	Fe_Ex19	One	Long	3 - Exhausted	Perpendicular	flake, bladelet	Delpiano	Hammer1	Anvil2_Cantina	Hard	513
4	Fe_Ex19	Integer	Integer	24	17	1.41176	3	Production	Flake	1-25	Distal	Linear	Rectilinear	Feather			1-Unidirectional		Ferrara	8	Fe19	Chert	51	28	10	18.1	1.82143	5.1	Retouched flake	triangular prism	angular	no	fine-grained	1	Fe_Ex19	One	Long	3 - Exhausted	Perpendicular	flake, bladelet	Delpiano	Hammer1	Anvil2_Cantina	Hard	513
5	Fe_Ex19	Fragmented	Meso-Proximal	15	3	5	3	Production	Spall	0		Rectangular triangle	Rectilinear	Broken			5-Perpendicular		Ferrara	8	Fe19	Chert	51	28	10	18.1	1.82143	5.1	Retouched flake	triangular prism	angular	no	fine-grained	1	Fe_Ex19	One	Long	3 - Exhausted	Perpendicular	flake, bladelet	Delpiano	Hammer1	Anvil2_Cantina	Hard	513
6	Fe_Ex19	Fragmented	Proximal	20	27	0.740741	5	Production	Flake	1-25	Lateral	Linear	Convex	Broken			Indet		Ferrara	8	Fe19	Chert	51	28	10	18.1	1.82143	5.1	Retouched flake	triangular prism	angular	no	fine-grained	1	Fe_Ex19	One	Long	3 - Exhausted	Perpendicular	flake, bladelet	Delpiano	Hammer1	Anvil2_Cantina	Hard	513
7	Fe_Ex19	Fragmented	Distal	21	26	0.807692	3	Production	Flake	0		Linear	Rectilinear	Plunging			Indet		Ferrara	8	Fe19	Chert	51	28	10	18.1	1.82143	5.1	Retouched flake	triangular prism	angular	no	fine-grained	1	Fe_Ex19	One	Long	3 - Exhausted	Perpendicular	flake, bladelet	Delpiano	Hammer1	Anvil2_Cantina	Hard	513
0	Fe_Ex20	Integer	Integer	37	18	2.05556	8	Final	Core	26-50	Lateral	Trapeze			flatparalelepiped	2	1-Unidirectional		Ferrara	6	Fe20	Chert	43	23	15	11.7	1.86957	2.86667	Flake	Polyhedron	angular	no	fine-grained	1	Fe_Ex20	One	Long	1 - Low	Perpendicular	flake, bladelet	Delpiano	Hammer1	Anvil2_Cantina	Hard	513
1	Fe_Ex20	Integer	Integer	22	11	2	1	Production	Bladelet	1-25		Linear	Rectilinear	Feather			1-Unidirectional		Ferrara	6	Fe20	Chert	43	23	15	11.7	1.86957	2.86667	Flake	Polyhedron	angular	no	fine-grained	1	Fe_Ex20	One	Long	1 - Low	Perpendicular	flake, bladelet	Delpiano	Hammer1	Anvil2_Cantina	Hard	513
2	Fe_Ex20	Fragmented	Meso-Distal	19	5	3.8	2	Production	Bladelet	26-50	Lateral	Triangular	Twisted	Feather			1-Unidirectional		Ferrara	6	Fe20	Chert	43	23	15	11.7	1.86957	2.86667	Flake	Polyhedron	angular	no	fine-grained	1	Fe_Ex20	One	Long	1 - Low	Perpendicular	flake, bladelet	Delpiano	Hammer1	Anvil2_Cantina	Hard	513
3	Fe_Ex20	Fragmented	Mesial	8	7	1.14286	1	Production	Bladelet	1-25	Lateral	Rectangular triangle	Rectilinear	Broken			Indet		Ferrara	6	Fe20	Chert	43	23	15	11.7	1.86957	2.86667	Flake	Polyhedron	angular	no	fine-grained	1	Fe_Ex20	One	Long	1 - Low	Perpendicular	flake, bladelet	Delpiano	Hammer1	Anvil2_Cantina	Hard	513
4	Fe_Ex20	Fragmented	Proximal	22	20	1.1	6	Production	Flake	0		Triangular	Convex	Broken			1-Unidirectional		Ferrara	6	Fe20	Chert	43	23	15	11.7	1.86957	2.86667	Flake	Polyhedron	angular	no	fine-grained	1	Fe_Ex20	One	Long	1 - Low	Perpendicular	flake, bladelet	Delpiano	Hammer1	Anvil2_Cantina	Hard	513
5	Fe_Ex20	Fragmented	Distal	19	20	0.95	13	Production	Flake	1-25	Lateral	Triangular	Rectilinear	Plunging			2-Bidirectional		Ferrara	6	Fe20	Chert	43	23	15	11.7	1.86957	2.86667	Flake	Polyhedron	angular	no	fine-grained	1	Fe_Ex20	One	Long	1 - Low	Perpendicular	flake, bladelet	Delpiano	Hammer1	Anvil2_Cantina	Hard	513
0	Fe_Ex21	Integer	Integer	30	26	1.15385	12	Final	Core	0		Triangular			flatparalelepiped	3	2-Bidirectional		Ferrara	23	Fe21	Chert	56	38	18	49.3	1.47368	3.11111	Core	Polyhedron	angular	no	fine-grained	1	Fe_Ex21	One	Long	3 - Exhausted	Perpendicular	flake, bladelet	Delpiano	Hammer1	Anvil1_lab	Hard	513
1	Fe_Ex21	Integer	Integer	13	15	0.866667	3	Production	Flake	0		Triangular	Rectilinear	Feather			1-Unidirectional		Ferrara	23	Fe21	Chert	56	38	18	49.3	1.47368	3.11111	Core	Polyhedron	angular	no	fine-grained	1	Fe_Ex21	One	Long	3 - Exhausted	Perpendicular	flake, bladelet	Delpiano	Hammer1	Anvil1_lab	Hard	513
2	Fe_Ex21	Integer	Integer	30	16	1.875	4	Production	Backed flake	1-25	Lateral back	Triangular	Rectilinear	Feather			1-Unidirectional		Ferrara	23	Fe21	Chert	56	38	18	49.3	1.47368	3.11111	Core	Polyhedron	angular	no	fine-grained	1	Fe_Ex21	One	Long	3 - Exhausted	Perpendicular	flake, bladelet	Delpiano	Hammer1	Anvil1_lab	Hard	513
3a	Fe_Ex21	Fragmented	Distal	8	15	0.533333	3	Production	Flake	0		Linear	Convex	Hinged			1-Unidirectional		Ferrara	23	Fe21	Chert	56	38	18	49.3	1.47368	3.11111	Core	Polyhedron	angular	no	fine-grained	1	Fe_Ex21	One	Long	3 - Exhausted	Perpendicular	flake, bladelet	Delpiano	Hammer1	Anvil1_lab	Hard	513
3b	Fe_Ex21	Integer	Integer	19	8	2.375	1	Production	Bladelet	0		Linear	Twisted	Feather			1-Unidirectional		Ferrara	23	Fe21	Chert	56	38	18	49.3	1.47368	3.11111	Core	Polyhedron	angular	no	fine-grained	1	Fe_Ex21	One	Long	3 - Exhausted	Perpendicular	flake, bladelet	Delpiano	Hammer1	Anvil1_lab	Hard	513
4	Fe_Ex21	Integer	Integer	38	32	1.1875	5	Production	Flake	76-99	Semi-total	Rectangular triangle	Rectilinear	Feather			Indet		Ferrara	23	Fe21	Chert	56	38	18	49.3	1.47368	3.11111	Core	Polyhedron	angular	no	fine-grained	1	Fe_Ex21	One	Long	3 - Exhausted	Perpendicular	flake, bladelet	Delpiano	Hammer1	Anvil1_lab	Hard	513
5a	Fe_Ex21	Fragmented	Meso-Proximal	29	21	1.38095	6	Production	Blade	26-50	Lateral back	Triangular	Concave	Broken			1-Unidirectional		Ferrara	23	Fe21	Chert	56	38	18	49.3	1.47368	3.11111	Core	Polyhedron	angular	no	fine-grained	1	Fe_Ex21	One	Long	3 - Exhausted	Perpendicular	flake, bladelet	Delpiano	Hammer1	Anvil1_lab	Hard	513
5b	Fe_Ex21	Fragmented	Distal	23	11	2.09091	5	Production	Bladelet	76-99	Semi-total	Triangular	Concave	Feather			Indet		Ferrara	23	Fe21	Chert	56	38	18	49.3	1.47368	3.11111	Core	Polyhedron	angular	no	fine-grained	1	Fe_Ex21	One	Long	3 - Exhausted	Perpendicular	flake, bladelet	Delpiano	Hammer1	Anvil1_lab	Hard	513
6a	Fe_Ex21	Integer	Integer	23	28	0.821429	5	Production	Flake	51-75	Semi-total	Linear	Rectilinear	Hinged			Indet		Ferrara	23	Fe21	Chert	56	38	18	49.3	1.47368	3.11111	Core	Polyhedron	angular	no	fine-grained	1	Fe_Ex21	One	Long	3 - Exhausted	Perpendicular	flake, bladelet	Delpiano	Hammer1	Anvil1_lab	Hard	513
6b	Fe_Ex21	Integer	Integer	19	7	2.71429	1	Production	Bladelet	0		Triangular	Twisted	Feather			1-Unidirectional		Ferrara	23	Fe21	Chert	56	38	18	49.3	1.47368	3.11111	Core	Polyhedron	angular	no	fine-grained	1	Fe_Ex21	One	Long	3 - Exhausted	Perpendicular	flake, bladelet	Delpiano	Hammer1	Anvil1_lab	Hard	513
6c	Fe_Ex21	Integer	Integer	13	7	1.85714	1	Production	Flake	0		Linear	Rectilinear	Feather			1-Unidirectional		Ferrara	23	Fe21	Chert	56	38	18	49.3	1.47368	3.11111	Core	Polyhedron	angular	no	fine-grained	1	Fe_Ex21	One	Long	3 - Exhausted	Perpendicular	flake, bladelet	Delpiano	Hammer1	Anvil1_lab	Hard	513
7a	Fe_Ex21	Integer	Integer	12	15	0.8	2	Production	Flake	0		Linear	Rectilinear	Feather			2-Bidirectional		Ferrara	23	Fe21	Chert	56	38	18	49.3	1.47368	3.11111	Core	Polyhedron	angular	no	fine-grained	1	Fe_Ex21	One	Long	3 - Exhausted	Perpendicular	flake, bladelet	Delpiano	Hammer1	Anvil1_lab	Hard	513
7b	Fe_Ex21	Integer	Integer	17	12	1.41667	1	Production	Flake	0		Linear	Rectilinear	Feather			1-Unidirectional		Ferrara	23	Fe21	Chert	56	38	18	49.3	1.47368	3.11111	Core	Polyhedron	angular	no	fine-grained	1	Fe_Ex21	One	Long	3 - Exhausted	Perpendicular	flake, bladelet	Delpiano	Hammer1	Anvil1_lab	Hard	513
8a	Fe_Ex21	Fragmented	Meso-Distal	18	5	3.6	3	Production	Spall	0		Rectangular triangle	Wavy	Hinged			Indet		Ferrara	23	Fe21	Chert	56	38	18	49.3	1.47368	3.11111	Core	Polyhedron	angular	no	fine-grained	1	Fe_Ex21	One	Long	3 - Exhausted	Perpendicular	flake, bladelet	Delpiano	Hammer1	Anvil1_lab	Hard	513
8b	Fe_Ex21	Fragmented	Meso-Distal	21	5	4.2	2	Production	Spall	0		Triangular	Concave	Plunging			Indet		Ferrara	23	Fe21	Chert	56	38	18	49.3	1.47368	3.11111	Core	Polyhedron	angular	no	fine-grained	1	Fe_Ex21	One	Long	3 - Exhausted	Perpendicular	flake, bladelet	Delpiano	Hammer1	Anvil1_lab	Hard	513
8c	Fe_Ex21	Integer	Integer	8	17	0.470588	2	Production	Flake	0		Linear	Rectilinear	Hinged			Indet		Ferrara	23	Fe21	Chert	56	38	18	49.3	1.47368	3.11111	Core	Polyhedron	angular	no	fine-grained	1	Fe_Ex21	One	Long	3 - Exhausted	Perpendicular	flake, bladelet	Delpiano	Hammer1	Anvil1_lab	Hard	513
9	Fe_Ex21	Integer	Integer	23	17	1.35294	4	Production	Backed flake	1-25	Lateral	Rectangular triangle	Rectilinear	Feather			2-Bidirectional		Ferrara	23	Fe21	Chert	56	38	18	49.3	1.47368	3.11111	Core	Polyhedron	angular	no	fine-grained	1	Fe_Ex21	One	Long	3 - Exhausted	Perpendicular	flake, bladelet	Delpiano	Hammer1	Anvil1_lab	Hard	513
10	Fe_Ex21	Integer	Integer	33	13	2.53846	8	Production	Spall	26-50	Semi-total	Rectangular Trapeze	Concave	Plunging			2-Bidirectional		Ferrara	23	Fe21	Chert	56	38	18	49.3	1.47368	3.11111	Core	Polyhedron	angular	no	fine-grained	1	Fe_Ex21	One	Long	3 - Exhausted	Perpendicular	flake, bladelet	Delpiano	Hammer1	Anvil1_lab	Hard	513
11	Fe_Ex21	Integer	Integer	11	19	0.578947	1	Production	Flake	0		Linear	Rectilinear	Feather			1-Unidirectional		Ferrara	23	Fe21	Chert	56	38	18	49.3	1.47368	3.11111	Core	Polyhedron	angular	no	fine-grained	1	Fe_Ex21	One	Long	3 - Exhausted	Perpendicular	flake, bladelet	Delpiano	Hammer1	Anvil1_lab	Hard	513
12	Fe_Ex21	Integer	Integer	31	11	2.81818	6	Production	Spall	26-50	Lateral back	Rectangular triangle	Wavy	Plunging			2-Bidirectional		Ferrara	23	Fe21	Chert	56	38	18	49.3	1.47368	3.11111	Core	Polyhedron	angular	no	fine-grained	1	Fe_Ex21	One	Long	3 - Exhausted	Perpendicular	flake, bladelet	Delpiano	Hammer1	Anvil1_lab	Hard	513
13a	Fe_Ex21	Integer	Integer	18	12	1.5	3	Production	Flake	0		Linear	Rectilinear	Feather			1-Unidirectional		Ferrara	23	Fe21	Chert	56	38	18	49.3	1.47368	3.11111	Core	Polyhedron	angular	no	fine-grained	1	Fe_Ex21	One	Long	3 - Exhausted	Perpendicular	flake, bladelet	Delpiano	Hammer1	Anvil1_lab	Hard	513
13b	Fe_Ex21	Fragmented	Meso-Distal	18	15	1.2	1	Production	Flake	0		Linear	Concave	Feather			2-Bidirectional		Ferrara	23	Fe21	Chert	56	38	18	49.3	1.47368	3.11111	Core	Polyhedron	angular	no	fine-grained	1	Fe_Ex21	One	Long	3 - Exhausted	Perpendicular	flake, bladelet	Delpiano	Hammer1	Anvil1_lab	Hard	513
14	Fe_Ex21	Fragmented	Meso-Distal	22	12	1.83333	6	Production	Flake	0		Triangular	Concave	Feather			2-Bidirectional		Ferrara	23	Fe21	Chert	56	38	18	49.3	1.47368	3.11111	Core	Polyhedron	angular	no	fine-grained	1	Fe_Ex21	One	Long	3 - Exhausted	Perpendicular	flake, bladelet	Delpiano	Hammer1	Anvil1_lab	Hard	513
1a	Fe_Ex22a	Integer	Integer	16	6	2.66667	3	Production	Spall	0		Triangular	Concave	Plunging			5-Perpendicular		Ferrara	13	Fe22a	Chert	34	46	15	30.2	0.73913	2.26667	Flake	truncated pyramid/frustum	angular	no	fine-grained	2	Fe_Ex22a, Fe_Ex22b	One	Long	3 - Exhausted	Perpendicular	flake, bladelet	Delpiano	Hammer1	Anvil1_lab	Hard	513
1b	Fe_Ex22a	Integer	Integer	13	8	1.625	1	Production	Flake	0		Triangular	Rectilinear	Feather			Indet		Ferrara	13	Fe22a	Chert	34	46	15	30.2	0.73913	2.26667	Flake	truncated pyramid/frustum	angular	no	fine-grained	2	Fe_Ex22a, Fe_Ex22b	One	Long	3 - Exhausted	Perpendicular	flake, bladelet	Delpiano	Hammer1	Anvil1_lab	Hard	513
2	Fe_Ex22a	Fragmented	Distal	12	3	4	1	Production	Bladelet	0		Linear	Twisted	Plunging			Indet		Ferrara	13	Fe22a	Chert	34	46	15	30.2	0.73913	2.26667	Flake	truncated pyramid/frustum	angular	no	fine-grained	2	Fe_Ex22a, Fe_Ex22b	One	Long	3 - Exhausted	Perpendicular	flake, bladelet	Delpiano	Hammer1	Anvil1_lab	Hard	513
3	Fe_Ex22a	Integer	Integer	24	25	0.96	3	Production	Backed flake	0		Rectangular triangle	Concave	Broken			5-Perpendicular		Ferrara	13	Fe22a	Chert	34	46	15	30.2	0.73913	2.26667	Flake	truncated pyramid/frustum	angular	no	fine-grained	2	Fe_Ex22a, Fe_Ex22b	One	Long	3 - Exhausted	Perpendicular	flake, bladelet	Delpiano	Hammer1	Anvil1_lab	Hard	513
4a	Fe_Ex22a	Fragmented	Distal	11	16	0.6875	1	Production	Flake	0		Linear	Rectilinear	Feather			Indet		Ferrara	13	Fe22a	Chert	34	46	15	30.2	0.73913	2.26667	Flake	truncated pyramid/frustum	angular	no	fine-grained	2	Fe_Ex22a, Fe_Ex22b	One	Long	3 - Exhausted	Perpendicular	flake, bladelet	Delpiano	Hammer1	Anvil1_lab	Hard	513
4b	Fe_Ex22a	Fragmented	Distal	7	16	0.4375	1	Production	Flake	0		Linear	Rectilinear	Feather			Indet		Ferrara	13	Fe22a	Chert	34	46	15	30.2	0.73913	2.26667	Flake	truncated pyramid/frustum	angular	no	fine-grained	2	Fe_Ex22a, Fe_Ex22b	One	Long	3 - Exhausted	Perpendicular	flake, bladelet	Delpiano	Hammer1	Anvil1_lab	Hard	513
5	Fe_Ex22a	Integer	Integer	11	8	1.375	1	Production	Flake	0		Linear	Rectilinear	Feather			1-Unidirectional		Ferrara	13	Fe22a	Chert	34	46	15	30.2	0.73913	2.26667	Flake	truncated pyramid/frustum	angular	no	fine-grained	2	Fe_Ex22a, Fe_Ex22b	One	Long	3 - Exhausted	Perpendicular	flake, bladelet	Delpiano	Hammer1	Anvil1_lab	Hard	513
6a	Fe_Ex22a	Integer	Integer	37	18	2.05556	4	Production	Flake	1-25	Distal	Rectangular Trapeze	Rectilinear	Plunging			1-Unidirectional		Ferrara	13	Fe22a	Chert	34	46	15	30.2	0.73913	2.26667	Flake	truncated pyramid/frustum	angular	no	fine-grained	2	Fe_Ex22a, Fe_Ex22b	One	Long	3 - Exhausted	Perpendicular	flake, bladelet	Delpiano	Hammer1	Anvil1_lab	Hard	513
7a	Fe_Ex22a	Integer	Integer	31	11	2.81818	4	Production	Spall	0		Triangular	Concave	Plunging			2-Bidirectional		Ferrara	13	Fe22a	Chert	34	46	15	30.2	0.73913	2.26667	Flake	truncated pyramid/frustum	angular	no	fine-grained	2	Fe_Ex22a, Fe_Ex22b	One	Long	3 - Exhausted	Perpendicular	flake, bladelet	Delpiano	Hammer1	Anvil1_lab	Hard	513
8	Fe_Ex22a	Integer	Integer	17	6	2.83333	1	Production	Bladelet	0		Linear	Concave	Feather			1-Unidirectional		Ferrara	13	Fe22a	Chert	34	46	15	30.2	0.73913	2.26667	Flake	truncated pyramid/frustum	angular	no	fine-grained	2	Fe_Ex22a, Fe_Ex22b	One	Long	3 - Exhausted	Perpendicular	flake, bladelet	Delpiano	Hammer1	Anvil1_lab	Hard	513
8	Fe_Ex22a	Integer	Integer	11	2	5.5	1	Production	Bladelet	0		Linear	Twisted	Feather			Indet		Ferrara	13	Fe22a	Chert	34	46	15	30.2	0.73913	2.26667	Flake	truncated pyramid/frustum	angular	no	fine-grained	2	Fe_Ex22a, Fe_Ex22b	One	Long	3 - Exhausted	Perpendicular	flake, bladelet	Delpiano	Hammer1	Anvil1_lab	Hard	513
9a	Fe_Ex22a	Integer	Integer	27	18	1.5	6	Final	Core	0		Triangular			flatparalelepiped	2	2-Bidirectional		Ferrara	13	Fe22a	Chert	34	46	15	30.2	0.73913	2.26667	Flake	truncated pyramid/frustum	angular	no	fine-grained	2	Fe_Ex22a, Fe_Ex22b	One	Long	3 - Exhausted	Perpendicular	flake, bladelet	Delpiano	Hammer1	Anvil1_lab	Hard	513
9b	Fe_Ex22a	Integer	Integer	27	18	1.5	7	Production	Flake	0		Trapeze	Wavy	Plunging			2-Bidirectional		Ferrara	13	Fe22a	Chert	34	46	15	30.2	0.73913	2.26667	Flake	truncated pyramid/frustum	angular	no	fine-grained	2	Fe_Ex22a, Fe_Ex22b	One	Long	3 - Exhausted	Perpendicular	flake, bladelet	Delpiano	Hammer1	Anvil1_lab	Hard	513
10	Fe_Ex22b	Integer	Integer	29	13	2.23077	4	Production	Flake	51-75	Semi-total	Rectangular Trapeze	Rectilinear	Feather			2-Bidirectional		Ferrara	10	Fe22b	Chert	34	46	15	30.2	0.73913	2.26667	Flake	truncated pyramid/frustum	angular	no	fine-grained	2	Fe_Ex22a, Fe_Ex22b	One	Long	3 - Exhausted	Perpendicular	flake, bladelet	Delpiano	Hammer1	Anvil1_lab	Hard	513
11	Fe_Ex22b	Integer	Integer	20	12	1.66667	5	Production	Flake	0		Triangular	Rectilinear	Plunging			5-Perpendicular		Ferrara	10	Fe22b	Chert	34	46	15	30.2	0.73913	2.26667	Flake	truncated pyramid/frustum	angular	no	fine-grained	2	Fe_Ex22a, Fe_Ex22b	One	Long	3 - Exhausted	Perpendicular	flake, bladelet	Delpiano	Hammer1	Anvil1_lab	Hard	513
13	Fe_Ex22b	Integer	Integer	22	9	2.44444	2	Production	Bladelet	0		Linear	Convex	Plunging			5-Perpendicular		Ferrara	10	Fe22b	Chert	34	46	15	30.2	0.73913	2.26667	Flake	truncated pyramid/frustum	angular	no	fine-grained	2	Fe_Ex22a, Fe_Ex22b	One	Long	3 - Exhausted	Perpendicular	flake, bladelet	Delpiano	Hammer1	Anvil1_lab	Hard	513
14	Fe_Ex22b	Integer	Integer	16	10	1.6	1	Production	Flake	0		Linear	Rectilinear	Feather			1-Unidirectional		Ferrara	10	Fe22b	Chert	34	46	15	30.2	0.73913	2.26667	Flake	truncated pyramid/frustum	angular	no	fine-grained	2	Fe_Ex22a, Fe_Ex22b	One	Long	3 - Exhausted	Perpendicular	flake, bladelet	Delpiano	Hammer1	Anvil1_lab	Hard	513
14	Fe_Ex22b	Fragmented	Lateral	15	5	3	1	Production	Flake	0		Linear	Rectilinear	Feather			Indet		Ferrara	10	Fe22b	Chert	34	46	15	30.2	0.73913	2.26667	Flake	truncated pyramid/frustum	angular	no	fine-grained	2	Fe_Ex22a, Fe_Ex22b	One	Long	3 - Exhausted	Perpendicular	flake, bladelet	Delpiano	Hammer1	Anvil1_lab	Hard	513
15	Fe_Ex22b	Integer	Integer	16	13	1.23077	3	Production	Flake	0		Linear	Wavy	Hinged			1-Unidirectional		Ferrara	10	Fe22b	Chert	34	46	15	30.2	0.73913	2.26667	Flake	truncated pyramid/frustum	angular	no	fine-grained	2	Fe_Ex22a, Fe_Ex22b	One	Long	3 - Exhausted	Perpendicular	flake, bladelet	Delpiano	Hammer1	Anvil1_lab	Hard	513
15	Fe_Ex22b	Fragmented	Distal	13	8	1.625	1	Production	Flake	0		Trapeze	Rectilinear	Feather			1-Unidirectional		Ferrara	10	Fe22b	Chert	34	46	15	30.2	0.73913	2.26667	Flake	truncated pyramid/frustum	angular	no	fine-grained	2	Fe_Ex22a, Fe_Ex22b	One	Long	3 - Exhausted	Perpendicular	flake, bladelet	Delpiano	Hammer1	Anvil1_lab	Hard	513
16	Fe_Ex22b	Integer	Integer	16	5	3.2	1	Production	Bladelet	0		Trapeze	Rectilinear	Hinged			1-Unidirectional		Ferrara	10	Fe22b	Chert	34	46	15	30.2	0.73913	2.26667	Flake	truncated pyramid/frustum	angular	no	fine-grained	2	Fe_Ex22a, Fe_Ex22b	One	Long	3 - Exhausted	Perpendicular	flake, bladelet	Delpiano	Hammer1	Anvil1_lab	Hard	513
17	Fe_Ex22b	Integer	Integer	28	18	1.55556	8	Final	Core	0		Triangular			flatparalelepiped	3	2-Bidirectional		Ferrara	10	Fe22b	Chert	34	46	15	30.2	0.73913	2.26667	Flake	truncated pyramid/frustum	angular	no	fine-grained	2	Fe_Ex22a, Fe_Ex22b	One	Long	3 - Exhausted	Perpendicular	flake, bladelet	Delpiano	Hammer1	Anvil1_lab	Hard	513
18	Fe_Ex22b	Integer	Integer	21	13	1.61538	3	Production	Flake	0		Triangular	Concave	Feather			1-Unidirectional		Ferrara	10	Fe22b	Chert	34	46	15	30.2	0.73913	2.26667	Flake	truncated pyramid/frustum	angular	no	fine-grained	2	Fe_Ex22a, Fe_Ex22b	One	Long	3 - Exhausted	Perpendicular	flake, bladelet	Delpiano	Hammer1	Anvil1_lab	Hard	513
0	Fe_Ex24	Integer	Integer	34	25	1.36	10	Final	Core	1-25		Triangular			flatparalelepiped	2	2-Bidirectional		Ferrara	18	Fe24	Chert	50	44	15	27.2	1.13636	3.33333	Core	Polyhedron	angular	no	fine-grained	1	Fe_Ex24	One	Long	3 - Exhausted	Perpendicular	flake, bladelet	Delpiano	Hammer1	Anvil1_lab	Hard	513
1	Fe_Ex24	Integer	Integer	15	9	1.66667	3	Production	Flake	0		Triangular	Rectilinear	Feather			2-Bidirectional		Ferrara	18	Fe24	Chert	50	44	15	27.2	1.13636	3.33333	Core	Polyhedron	angular	no	fine-grained	1	Fe_Ex24	One	Long	3 - Exhausted	Perpendicular	flake, bladelet	Delpiano	Hammer1	Anvil1_lab	Hard	513
1	Fe_Ex24	Fragmented	Proximal	9	12	0.75	2	Production	Flake	0		Linear	Rectilinear	Broken			Indet		Ferrara	18	Fe24	Chert	50	44	15	27.2	1.13636	3.33333	Core	Polyhedron	angular	no	fine-grained	1	Fe_Ex24	One	Long	3 - Exhausted	Perpendicular	flake, bladelet	Delpiano	Hammer1	Anvil1_lab	Hard	513
1	Fe_Ex24	Fragmented	Mesial	10	11	0.909091	1	Production	Flake	0		Linear	Rectilinear	Broken			Indet		Ferrara	18	Fe24	Chert	50	44	15	27.2	1.13636	3.33333	Core	Polyhedron	angular	no	fine-grained	1	Fe_Ex24	One	Long	3 - Exhausted	Perpendicular	flake, bladelet	Delpiano	Hammer1	Anvil1_lab	Hard	513
2	Fe_Ex24	Integer	Integer	36	24	1.5	8	Production	Flake	0		Trapeze	Concave	Plunging			2-Bidirectional		Ferrara	18	Fe24	Chert	50	44	15	27.2	1.13636	3.33333	Core	Polyhedron	angular	no	fine-grained	1	Fe_Ex24	One	Long	3 - Exhausted	Perpendicular	flake, bladelet	Delpiano	Hammer1	Anvil1_lab	Hard	513
2	Fe_Ex24	Integer	Integer	31	15	2.06667	3	Production	Blade	26-50	Distal	Triangular	Concave	Plunging			2-Bidirectional		Ferrara	18	Fe24	Chert	50	44	15	27.2	1.13636	3.33333	Core	Polyhedron	angular	no	fine-grained	1	Fe_Ex24	One	Long	3 - Exhausted	Perpendicular	flake, bladelet	Delpiano	Hammer1	Anvil1_lab	Hard	513
2	Fe_Ex24	Fragmented	Composite	12	7	1.71429	2	Production	Chunk	0		Linear		Broken			Indet		Ferrara	18	Fe24	Chert	50	44	15	27.2	1.13636	3.33333	Core	Polyhedron	angular	no	fine-grained	1	Fe_Ex24	One	Long	3 - Exhausted	Perpendicular	flake, bladelet	Delpiano	Hammer1	Anvil1_lab	Hard	513
2	Fe_Ex24	Fragmented	Mesial	16	8	2	2	Production	Bladelet	51-75	Lateral	Triangular	Rectilinear	Broken			1-Unidirectional		Ferrara	18	Fe24	Chert	50	44	15	27.2	1.13636	3.33333	Core	Polyhedron	angular	no	fine-grained	1	Fe_Ex24	One	Long	3 - Exhausted	Perpendicular	flake, bladelet	Delpiano	Hammer1	Anvil1_lab	Hard	513
2	Fe_Ex24	Fragmented	Distal	14	5	2.8	1	Production	Bladelet	51-75	Lateral	Triangular	Rectilinear	Feather			1-Unidirectional		Ferrara	18	Fe24	Chert	50	44	15	27.2	1.13636	3.33333	Core	Polyhedron	angular	no	fine-grained	1	Fe_Ex24	One	Long	3 - Exhausted	Perpendicular	flake, bladelet	Delpiano	Hammer1	Anvil1_lab	Hard	513
2	Fe_Ex24	Integer	Integer	11	3	3.66667	1	Production	Spall	0		Rectangular triangle	Rectilinear	Feather			Indet		Ferrara	18	Fe24	Chert	50	44	15	27.2	1.13636	3.33333	Core	Polyhedron	angular	no	fine-grained	1	Fe_Ex24	One	Long	3 - Exhausted	Perpendicular	flake, bladelet	Delpiano	Hammer1	Anvil1_lab	Hard	513
2	Fe_Ex24	Integer	Integer	11	4	2.75	1	Production	Bladelet	0		Linear	Twisted	Feather			Indet		Ferrara	18	Fe24	Chert	50	44	15	27.2	1.13636	3.33333	Core	Polyhedron	angular	no	fine-grained	1	Fe_Ex24	One	Long	3 - Exhausted	Perpendicular	flake, bladelet	Delpiano	Hammer1	Anvil1_lab	Hard	513
2	Fe_Ex24	Integer	Integer	7	12	0.583333	1	Production	Flake	0		Linear	Rectilinear	Hinged			Indet		Ferrara	18	Fe24	Chert	50	44	15	27.2	1.13636	3.33333	Core	Polyhedron	angular	no	fine-grained	1	Fe_Ex24	One	Long	3 - Exhausted	Perpendicular	flake, bladelet	Delpiano	Hammer1	Anvil1_lab	Hard	513
2	Fe_Ex24	Integer	Integer	14	10	1.4	4	Production	Flake	51-75	Proximal	Triangular	Convex	Hinged			Indet		Ferrara	18	Fe24	Chert	50	44	15	27.2	1.13636	3.33333	Core	Polyhedron	angular	no	fine-grained	1	Fe_Ex24	One	Long	3 - Exhausted	Perpendicular	flake, bladelet	Delpiano	Hammer1	Anvil1_lab	Hard	513
2	Fe_Ex24	Integer	Integer	7	12	0.583333	1	Production	Flake	0		Linear	Convex	Hinged			1-Unidirectional		Ferrara	18	Fe24	Chert	50	44	15	27.2	1.13636	3.33333	Core	Polyhedron	angular	no	fine-grained	1	Fe_Ex24	One	Long	3 - Exhausted	Perpendicular	flake, bladelet	Delpiano	Hammer1	Anvil1_lab	Hard	513
3	Fe_Ex24	Integer	Integer	24	10	2.4	3	Production	Bladelet	0		Triangular	Concave	Feather			2-Bidirectional		Ferrara	18	Fe24	Chert	50	44	15	27.2	1.13636	3.33333	Core	Polyhedron	angular	no	fine-grained	1	Fe_Ex24	One	Long	3 - Exhausted	Perpendicular	flake, bladelet	Delpiano	Hammer1	Anvil1_lab	Hard	513
3	Fe_Ex24	Integer	Integer	10	6	1.66667	1	Production	Flake	0		Linear	Rectilinear	Feather			1-Unidirectional		Ferrara	18	Fe24	Chert	50	44	15	27.2	1.13636	3.33333	Core	Polyhedron	angular	no	fine-grained	1	Fe_Ex24	One	Long	3 - Exhausted	Perpendicular	flake, bladelet	Delpiano	Hammer1	Anvil1_lab	Hard	513
3	Fe_Ex24	Integer	Integer	13	6	2.16667	1	Production	Bladelet	0		Linear	Rectilinear	Feather			1-Unidirectional		Ferrara	18	Fe24	Chert	50	44	15	27.2	1.13636	3.33333	Core	Polyhedron	angular	no	fine-grained	1	Fe_Ex24	One	Long	3 - Exhausted	Perpendicular	flake, bladelet	Delpiano	Hammer1	Anvil1_lab	Hard	513
3	Fe_Ex24	Integer	Integer	15	15	1	2	Production	Flake	0		Linear	Rectilinear	Feather			1-Unidirectional		Ferrara	18	Fe24	Chert	50	44	15	27.2	1.13636	3.33333	Core	Polyhedron	angular	no	fine-grained	1	Fe_Ex24	One	Long	3 - Exhausted	Perpendicular	flake, bladelet	Delpiano	Hammer1	Anvil1_lab	Hard	513
0	Fe_Ex25	Integer	Integer	29	27	1.07407	8	Final	Core	26-50	Semi-total	Rectangular Trapeze			flatparalelepiped	2	2-Bidirectional		Ferrara	35	Fe25	Chert	57	41	15	44.3	1.13636	3.33333	Core	Polyhedron	angular	no	fine-grained	1	Fe_Ex25	Two	Short + Long	3 - Exhausted	Perpendicular, oblique	flake	Delpiano	Hammer1	Anvil1_lab	Hard	513
1	Fe_Ex25	Integer	Integer	20	12	1.66667	1	Production	Flake	0		Linear	Rectilinear	Feather			Indet		Ferrara	35	Fe25	Chert	57	41	15	44.3	1.39024	3.8	Core	Polyhedron	angular	no	fine-grained	1	Fe_Ex25	Two	Short + Long	3 - Exhausted	Perpendicular, oblique	flake	Delpiano	Hammer1	Anvil1_lab	Hard	513
1	Fe_Ex25	Fragmented	Distal	8	13	0.615385	1	Production	Flake	0		Linear	Rectilinear	Hinged			Indet		Ferrara	35	Fe25	Chert	57	41	15	44.3	1.39024	3.8	Core	Polyhedron	angular	no	fine-grained	1	Fe_Ex25	Two	Short + Long	3 - Exhausted	Perpendicular, oblique	flake	Delpiano	Hammer1	Anvil1_lab	Hard	513
1	Fe_Ex25	Fragmented	Proximal	10	10	1	1	Production	Flake	0		Linear	Rectilinear	Broken			Indet		Ferrara	35	Fe25	Chert	57	41	15	44.3	1.39024	3.8	Core	Polyhedron	angular	no	fine-grained	1	Fe_Ex25	Two	Short + Long	3 - Exhausted	Perpendicular, oblique	flake	Delpiano	Hammer1	Anvil1_lab	Hard	513
1	Fe_Ex25	Fragmented	Mesial	11	10	1.1	1	Production	Flake	1-25	Lateral	Linear	Rectilinear	Broken			Indet		Ferrara	35	Fe25	Chert	57	41	15	44.3	1.39024	3.8	Core	Polyhedron	angular	no	fine-grained	1	Fe_Ex25	Two	Short + Long	3 - Exhausted	Perpendicular, oblique	flake	Delpiano	Hammer1	Anvil1_lab	Hard	513
1	Fe_Ex25	Integer	Integer	12	3	4	1	Production	Bladelet	0		Linear	Rectilinear	Feather			Indet		Ferrara	35	Fe25	Chert	57	41	15	44.3	1.39024	3.8	Core	Polyhedron	angular	no	fine-grained	1	Fe_Ex25	Two	Short + Long	3 - Exhausted	Perpendicular, oblique	flake	Delpiano	Hammer1	Anvil1_lab	Hard	513
2	Fe_Ex25	Integer	Integer	21	14	1.5	4	Production	Flake	0		Triangular	Wavy	Feather			1-Unidirectional		Ferrara	35	Fe25	Chert	57	41	15	44.3	1.39024	3.8	Core	Polyhedron	angular	no	fine-grained	1	Fe_Ex25	Two	Short + Long	3 - Exhausted	Perpendicular, oblique	flake	Delpiano	Hammer1	Anvil1_lab	Hard	513
2	Fe_Ex25	Integer	Integer	14	9	1.55556	2	Production	Flake	76-99	Semi-total	Linear	Rectilinear	Feather			Indet		Ferrara	35	Fe25	Chert	57	41	15	44.3	1.39024	3.8	Core	Polyhedron	angular	no	fine-grained	1	Fe_Ex25	Two	Short + Long	3 - Exhausted	Perpendicular, oblique	flake	Delpiano	Hammer1	Anvil1_lab	Hard	513
2	Fe_Ex25	Integer	Integer	10	13	0.769231	1	Production	Flake	1-25	Distal	Linear	Rectilinear	Hinged			1-Unidirectional		Ferrara	35	Fe25	Chert	57	41	15	44.3	1.39024	3.8	Core	Polyhedron	angular	no	fine-grained	1	Fe_Ex25	Two	Short + Long	3 - Exhausted	Perpendicular, oblique	flake	Delpiano	Hammer1	Anvil1_lab	Hard	513
2	Fe_Ex25	Integer	Integer	12	8	1.5	1	Production	Flake	1-25	Lateral	Linear	Rectilinear	Feather			Indet		Ferrara	35	Fe25	Chert	57	41	15	44.3	1.39024	3.8	Core	Polyhedron	angular	no	fine-grained	1	Fe_Ex25	Two	Short + Long	3 - Exhausted	Perpendicular, oblique	flake	Delpiano	Hammer1	Anvil1_lab	Hard	513
3	Fe_Ex25	Integer	Integer	33	25	1.32	4	Production	Backed flake	0		Rectangular triangle	Convex	Feather			2-Bidirectional		Ferrara	35	Fe25	Chert	57	41	15	44.3	1.39024	3.8	Core	Polyhedron	angular	no	fine-grained	1	Fe_Ex25	Two	Short + Long	3 - Exhausted	Perpendicular, oblique	flake	Delpiano	Hammer1	Anvil1_lab	Hard	513
3	Fe_Ex25	Integer	Integer	24	16	1.5	3	Production	Flake	0		Linear	Rectilinear	Feather			1-Unidirectional		Ferrara	35	Fe25	Chert	57	41	15	44.3	1.39024	3.8	Core	Polyhedron	angular	no	fine-grained	1	Fe_Ex25	Two	Short + Long	3 - Exhausted	Perpendicular, oblique	flake	Delpiano	Hammer1	Anvil1_lab	Hard	513
3	Fe_Ex25	Integer	Integer	18	12	1.5	1	Production	Flake	0		Linear	Rectilinear	Feather			Indet		Ferrara	35	Fe25	Chert	57	41	15	44.3	1.39024	3.8	Core	Polyhedron	angular	no	fine-grained	1	Fe_Ex25	Two	Short + Long	3 - Exhausted	Perpendicular, oblique	flake	Delpiano	Hammer1	Anvil1_lab	Hard	513
3	Fe_Ex25	Integer	Integer	15	10	1.5	2	Production	Flake	26-50	Proximal	Linear	Convex	Feather			Indet		Ferrara	35	Fe25	Chert	57	41	15	44.3	1.39024	3.8	Core	Polyhedron	angular	no	fine-grained	1	Fe_Ex25	Two	Short + Long	3 - Exhausted	Perpendicular, oblique	flake	Delpiano	Hammer1	Anvil1_lab	Hard	513
3	Fe_Ex25	Integer	Integer	12	11	1.09091	1	Production	Flake	0		Linear	Rectilinear	Feather			Indet		Ferrara	35	Fe25	Chert	57	41	15	44.3	1.39024	3.8	Core	Polyhedron	angular	no	fine-grained	1	Fe_Ex25	Two	Short + Long	3 - Exhausted	Perpendicular, oblique	flake	Delpiano	Hammer1	Anvil1_lab	Hard	513
3	Fe_Ex25	Integer	Integer	12	9	1.33333	1	Production	Flake	0		Linear	Concave	Feather			Indet		Ferrara	35	Fe25	Chert	57	41	15	44.3	1.39024	3.8	Core	Polyhedron	angular	no	fine-grained	1	Fe_Ex25	Two	Short + Long	3 - Exhausted	Perpendicular, oblique	flake	Delpiano	Hammer1	Anvil1_lab	Hard	513
3	Fe_Ex25	Integer	Integer	14	8	1.75	1	Production	Backed flake	0		Rectangular triangle	Rectilinear	Feather			Indet		Ferrara	35	Fe25	Chert	57	41	15	44.3	1.39024	3.8	Core	Polyhedron	angular	no	fine-grained	1	Fe_Ex25	Two	Short + Long	3 - Exhausted	Perpendicular, oblique	flake	Delpiano	Hammer1	Anvil1_lab	Hard	513
3	Fe_Ex25	Integer	Integer	24	11	2.18182	2	Production	Bladelet	0		Rectangular Trapeze	Rectilinear	Feather			2-Bidirectional		Ferrara	35	Fe25	Chert	57	41	15	44.3	1.39024	3.8	Core	Polyhedron	angular	no	fine-grained	1	Fe_Ex25	Two	Short + Long	3 - Exhausted	Perpendicular, oblique	flake	Delpiano	Hammer1	Anvil1_lab	Hard	513
3	Fe_Ex25	Fragmented	Distal	6	14	0.428571	1	Production	Flake	0		Linear	Rectilinear	Feather			Indet		Ferrara	35	Fe25	Chert	57	41	15	44.3	1.39024	3.8	Core	Polyhedron	angular	no	fine-grained	1	Fe_Ex25	Two	Short + Long	3 - Exhausted	Perpendicular, oblique	flake	Delpiano	Hammer1	Anvil1_lab	Hard	513
3	Fe_Ex25	Fragmented	Meso-Distal	15	12	1.25	2	Production	Flake	0		Linear	Rectilinear	Feather			1-Unidirectional		Ferrara	35	Fe25	Chert	57	41	15	44.3	1.39024	3.8	Core	Polyhedron	angular	no	fine-grained	1	Fe_Ex25	Two	Short + Long	3 - Exhausted	Perpendicular, oblique	flake	Delpiano	Hammer1	Anvil1_lab	Hard	513
3	Fe_Ex25	Fragmented	Mesial	13	16	0.8125	1	Production	Flake	0		Linear	Wavy	Broken			Indet		Ferrara	35	Fe25	Chert	57	41	15	44.3	1.39024	3.8	Core	Polyhedron	angular	no	fine-grained	1	Fe_Ex25	Two	Short + Long	3 - Exhausted	Perpendicular, oblique	flake	Delpiano	Hammer1	Anvil1_lab	Hard	513
4	Fe_Ex25	Integer	Integer	14	23	0.608696	9	Maintenance	Flake	51-75	Semi-total	Rectangular triangle	Wavy	Feather			Indet		Ferrara	35	Fe25	Chert	57	41	15	44.3	1.39024	3.8	Core	Polyhedron	angular	no	fine-grained	1	Fe_Ex25	Two	Short + Long	3 - Exhausted	Perpendicular, oblique	flake	Delpiano	Hammer1	Anvil1_lab	Hard	513
4	Fe_Ex25	Integer	Integer	11	12	0.916667	4	Maintenance	Flake	51-75	Semi-total	Rectangular Trapeze	Concave	Feather			Indet		Ferrara	35	Fe25	Chert	57	41	15	44.3	1.39024	3.8	Core	Polyhedron	angular	no	fine-grained	1	Fe_Ex25	Two	Short + Long	3 - Exhausted	Perpendicular, oblique	flake	Delpiano	Hammer1	Anvil1_lab	Hard	513
5	Fe_Ex25	Integer	Integer	28	23	1.21739	5	Production	Flake	1-25	Distal	Trapeze	Rectilinear	Feather			2-Bidirectional		Ferrara	35	Fe25	Chert	57	41	15	44.3	1.39024	3.8	Core	Polyhedron	angular	no	fine-grained	1	Fe_Ex25	Two	Short + Long	3 - Exhausted	Perpendicular, oblique	flake	Delpiano	Hammer1	Anvil1_lab	Hard	513
5	Fe_Ex25	Integer	Integer	29	18	1.61111	5	Production	Flake	26-50	Lateral	Triangular	Rectilinear	Feather			5-Perpendicular		Ferrara	35	Fe25	Chert	57	41	15	44.3	1.39024	3.8	Core	Polyhedron	angular	no	fine-grained	1	Fe_Ex25	Two	Short + Long	3 - Exhausted	Perpendicular, oblique	flake	Delpiano	Hammer1	Anvil1_lab	Hard	513
5	Fe_Ex25	Integer	Integer	28	22	1.27273	2	Production	Flake	0		Linear	Concave	Plunging			4-Multidirectional		Ferrara	35	Fe25	Chert	57	41	15	44.3	1.39024	3.8	Core	Polyhedron	angular	no	fine-grained	1	Fe_Ex25	Two	Short + Long	3 - Exhausted	Perpendicular, oblique	flake	Delpiano	Hammer1	Anvil1_lab	Hard	513
5	Fe_Ex25	Integer	Integer	13	14	0.928571	3	Production	Flake	0		Linear	Rectilinear	Feather			1-Unidirectional		Ferrara	35	Fe25	Chert	57	41	15	44.3	1.39024	3.8	Core	Polyhedron	angular	no	fine-grained	1	Fe_Ex25	Two	Short + Long	3 - Exhausted	Perpendicular, oblique	flake	Delpiano	Hammer1	Anvil1_lab	Hard	513
5	Fe_Ex25	Fragmented	Meso-Distal	19	12	1.58333	3	Production	Flake	76-99	Semi-total	Linear	Concave	Feather			Indet		Ferrara	35	Fe25	Chert	57	41	15	44.3	1.39024	3.8	Core	Polyhedron	angular	no	fine-grained	1	Fe_Ex25	Two	Short + Long	3 - Exhausted	Perpendicular, oblique	flake	Delpiano	Hammer1	Anvil1_lab	Hard	513
5	Fe_Ex25	Integer	Integer	12	6	2	2	Production	Flake	76-99	Semi-total	Linear	Twisted	Feather			Indet		Ferrara	35	Fe25	Chert	57	41	15	44.3	1.39024	3.8	Core	Polyhedron	angular	no	fine-grained	1	Fe_Ex25	Two	Short + Long	3 - Exhausted	Perpendicular, oblique	flake	Delpiano	Hammer1	Anvil1_lab	Hard	513
5	Fe_Ex25	Integer	Integer	14	11	1.27273	1	Production	Flake	0		Linear	Concave	Feather			1-Unidirectional		Ferrara	35	Fe25	Chert	57	41	15	44.3	1.39024	3.8	Core	Polyhedron	angular	no	fine-grained	1	Fe_Ex25	Two	Short + Long	3 - Exhausted	Perpendicular, oblique	flake	Delpiano	Hammer1	Anvil1_lab	Hard	513
5	Fe_Ex25	Integer	Integer	23	11	2.09091	3	Production	Spall	0		Trapeze	Concave	Hinged			2-Bidirectional		Ferrara	35	Fe25	Chert	57	41	15	44.3	1.39024	3.8	Core	Polyhedron	angular	no	fine-grained	1	Fe_Ex25	Two	Short + Long	3 - Exhausted	Perpendicular, oblique	flake	Delpiano	Hammer1	Anvil1_lab	Hard	513
5	Fe_Ex25	Integer	Integer	22	12	1.83333	6	Production	Spall	0		Triangular	Concave	Plunging			1-Unidirectional		Ferrara	35	Fe25	Chert	57	41	15	44.3	1.39024	3.8	Core	Polyhedron	angular	no	fine-grained	1	Fe_Ex25	Two	Short + Long	3 - Exhausted	Perpendicular, oblique	flake	Delpiano	Hammer1	Anvil1_lab	Hard	513
5	Fe_Ex25	Integer	Integer	12	11	1.09091	1	Production	Flake	0		Linear	Concave	Feather			1-Unidirectional		Ferrara	35	Fe25	Chert	57	41	15	44.3	1.39024	3.8	Core	Polyhedron	angular	no	fine-grained	1	Fe_Ex25	Two	Short + Long	3 - Exhausted	Perpendicular, oblique	flake	Delpiano	Hammer1	Anvil1_lab	Hard	513
5	Fe_Ex25	Integer	Integer	8	13	0.615385	1	Production	Flake	0		Linear	Rectilinear	Hinged			1-Unidirectional		Ferrara	35	Fe25	Chert	57	41	15	44.3	1.39024	3.8	Core	Polyhedron	angular	no	fine-grained	1	Fe_Ex25	Two	Short + Long	3 - Exhausted	Perpendicular, oblique	flake	Delpiano	Hammer1	Anvil1_lab	Hard	513
5	Fe_Ex25	Fragmented	Distal	13	8	1.625	1	Production	Flake	0		Linear	Concave	Feather			1-Unidirectional		Ferrara	35	Fe25	Chert	57	41	15	44.3	1.39024	3.8	Core	Polyhedron	angular	no	fine-grained	1	Fe_Ex25	Two	Short + Long	3 - Exhausted	Perpendicular, oblique	flake	Delpiano	Hammer1	Anvil1_lab	Hard	513
0	Fe_Ex27	Integer	Integer	38	20	1.9	11	Final	Core	0		Rectangular Trapeze			flatparalelepiped	3	2-Bidirectional		Ferrara	14	Fe27	Chert	41	58	11	32	1.39024	3.8	Retouched flake	Polyhedron	angular	no	fine-grained	1	Fe_Ex27	One	Long	3 - Exhausted	Perpendicular	flake, bladelet	Delpiano	Hammer2	Anvil1_lab	Hard	394
1	Fe_Ex27	Integer	Integer	37	17	2.17647	5	Production	Spall	0		Rectangular Trapeze	Wavy	Plunging			5-Perpendicular		Ferrara	14	Fe27	Chert	41	58	11	32	0.706897	3.72727	Retouched flake	Polyhedron	angular	no	fine-grained	1	Fe_Ex27	One	Long	3 - Exhausted	Perpendicular	flake, bladelet	Delpiano	Hammer2	Anvil1_lab	Hard	394
2	Fe_Ex27	Integer	Integer	35	13	2.69231	8	Production	Spall	0		Trapeze	Convex	Plunging			2-Bidirectional		Ferrara	14	Fe27	Chert	41	58	11	32	0.706897	3.72727	Retouched flake	Polyhedron	angular	no	fine-grained	1	Fe_Ex27	One	Long	3 - Exhausted	Perpendicular	flake, bladelet	Delpiano	Hammer2	Anvil1_lab	Hard	394
3	Fe_Ex27	Integer	Integer	38	10	3.8	5	Production	Spall	0		Trapeze	Twisted	Plunging			1-Unidirectional		Ferrara	14	Fe27	Chert	41	58	11	32	0.706897	3.72727	Retouched flake	Polyhedron	angular	no	fine-grained	1	Fe_Ex27	One	Long	3 - Exhausted	Perpendicular	flake, bladelet	Delpiano	Hammer2	Anvil1_lab	Hard	394
4	Fe_Ex27	Integer	Integer	30	11	2.72727	5	Production	Spall	0		Triangular	Wavy	Feather			5-Perpendicular		Ferrara	14	Fe27	Chert	41	58	11	32	0.706897	3.72727	Retouched flake	Polyhedron	angular	no	fine-grained	1	Fe_Ex27	One	Long	3 - Exhausted	Perpendicular	flake, bladelet	Delpiano	Hammer2	Anvil1_lab	Hard	394
5	Fe_Ex27	Integer	Integer	18	17	1.05882	2	Production	Flake	0		Linear	Rectilinear	Hinged			Indet		Ferrara	14	Fe27	Chert	41	58	11	32	0.706897	3.72727	Retouched flake	Polyhedron	angular	no	fine-grained	1	Fe_Ex27	One	Long	3 - Exhausted	Perpendicular	flake, bladelet	Delpiano	Hammer2	Anvil1_lab	Hard	394
6	Fe_Ex27	Integer	Integer	16	19	0.842105	1	Production	Flake	0		Rectangular triangle	Concave	Hinged			Indet		Ferrara	14	Fe27	Chert	41	58	11	32	0.706897	3.72727	Retouched flake	Polyhedron	angular	no	fine-grained	1	Fe_Ex27	One	Long	3 - Exhausted	Perpendicular	flake, bladelet	Delpiano	Hammer2	Anvil1_lab	Hard	394
7	Fe_Ex27	Integer	Integer	14	20	0.7	2	Production	Flake	0		Linear	Convex	Hinged			Indet		Ferrara	14	Fe27	Chert	41	58	11	32	0.706897	3.72727	Retouched flake	Polyhedron	angular	no	fine-grained	1	Fe_Ex27	One	Long	3 - Exhausted	Perpendicular	flake, bladelet	Delpiano	Hammer2	Anvil1_lab	Hard	394
8	Fe_Ex27	Integer	Integer	15	10	1.5	1	Production	Flake	0		Linear	Concave	Feather			1-Unidirectional		Ferrara	14	Fe27	Chert	41	58	11	32	0.706897	3.72727	Retouched flake	Polyhedron	angular	no	fine-grained	1	Fe_Ex27	One	Long	3 - Exhausted	Perpendicular	flake, bladelet	Delpiano	Hammer2	Anvil1_lab	Hard	394
9	Fe_Ex27	Fragmented	Proximal	16	9	1.77778	3	Production	Flake	0		Rectangular Trapeze	Concave	Broken			Indet		Ferrara	14	Fe27	Chert	41	58	11	32	0.706897	3.72727	Retouched flake	Polyhedron	angular	no	fine-grained	1	Fe_Ex27	One	Long	3 - Exhausted	Perpendicular	flake, bladelet	Delpiano	Hammer2	Anvil1_lab	Hard	394
10	Fe_Ex27	Fragmented	Composite	23	16	1.4375	8	Production	Chunk	0		Rectangular Trapeze	Rectilinear	Broken			2-Bidirectional		Ferrara	14	Fe27	Chert	41	58	11	32	0.706897	3.72727	Retouched flake	Polyhedron	angular	no	fine-grained	1	Fe_Ex27	One	Long	3 - Exhausted	Perpendicular	flake, bladelet	Delpiano	Hammer2	Anvil1_lab	Hard	394
11	Fe_Ex27	Integer	Integer	19	4	4.75	1	Production	Spall	0		Rectangular triangle	Rectilinear	Feather			1-Unidirectional		Ferrara	14	Fe27	Chert	41	58	11	32	0.706897	3.72727	Retouched flake	Polyhedron	angular	no	fine-grained	1	Fe_Ex27	One	Long	3 - Exhausted	Perpendicular	flake, bladelet	Delpiano	Hammer2	Anvil1_lab	Hard	394
12	Fe_Ex27	Integer	Integer	12	3	4	1	Production	Bladelet	0		Linear	Rectilinear	Feather			1-Unidirectional		Ferrara	14	Fe27	Chert	41	58	11	32	0.706897	3.72727	Retouched flake	Polyhedron	angular	no	fine-grained	1	Fe_Ex27	One	Long	3 - Exhausted	Perpendicular	flake, bladelet	Delpiano	Hammer2	Anvil1_lab	Hard	394
13	Fe_Ex27	Integer	Integer	41	15	2.73333	8	Production	Spall	0		Rectangular Trapeze	Twisted	Plunging			2-Bidirectional		Ferrara	14	Fe27	Chert	41	58	11	32	0.706897	3.72727	Retouched flake	Polyhedron	angular	no	fine-grained	1	Fe_Ex27	One	Long	3 - Exhausted	Perpendicular	flake, bladelet	Delpiano	Hammer2	Anvil1_lab	Hard	394
0	Fe_Ex28	Integer	Integer	31	26	1.19231	8	Final	Core	0		Triangular			flatparalelepiped		2-Bidirectional		Ferrara	13	Fe28	Chert	50	39	17	33.1	1.28205	2.94118	Flake	Polyhedron	angular	no	fine-grained	1	Fe_Ex28	Two	Short + Long	3 - Exhausted	Perpendicular	flake, bladelet	Delpiano	Hammer2	Anvil1_lab	Hard	394
1	Fe_Ex28	Integer	Integer	20	33	0.606061	10	Production	Flake	51-75	Semi-total	Triangular	Concave	Plunging			Indet		Ferrara	13	Fe28	Chert	50	39	17	33.1	1.28205	2.94118	Flake	Polyhedron	angular	no	fine-grained	1	Fe_Ex28	Two	Short + Long	3 - Exhausted	Perpendicular	flake, bladelet	Delpiano	Hammer2	Anvil1_lab	Hard	394
1	Fe_Ex28	Fragmented	Proximal	13	10	1.3	2	Production	Bladelet	0		Triangular	Concave	Broken			1-Unidirectional		Ferrara	13	Fe28	Chert	50	39	17	33.1	1.28205	2.94118	Flake	Polyhedron	angular	no	fine-grained	1	Fe_Ex28	Two	Short + Long	3 - Exhausted	Perpendicular	flake, bladelet	Delpiano	Hammer2	Anvil1_lab	Hard	394
1	Fe_Ex28	Fragmented	Mesial	15	7	2.14286	2	Production	Flake	0		Rectangular triangle	Rectilinear	Broken			Indet		Ferrara	13	Fe28	Chert	50	39	17	33.1	1.28205	2.94118	Flake	Polyhedron	angular	no	fine-grained	1	Fe_Ex28	Two	Short + Long	3 - Exhausted	Perpendicular	flake, bladelet	Delpiano	Hammer2	Anvil1_lab	Hard	394
2	Fe_Ex28	Integer	Integer	43	15	2.86667	13	Production	Spall	0		Triangular	Concave	Plunging			2-Bidirectional		Ferrara	13	Fe28	Chert	50	39	17	33.1	1.28205	2.94118	Flake	Polyhedron	angular	no	fine-grained	1	Fe_Ex28	Two	Short + Long	3 - Exhausted	Perpendicular	flake, bladelet	Delpiano	Hammer2	Anvil1_lab	Hard	394
2	Fe_Ex28	Fragmented	Meso-Proximal	33	24	1.375	9	Production	Flake	0		Triangular	Rectilinear	Broken			1-Unidirectional		Ferrara	13	Fe28	Chert	50	39	17	33.1	1.28205	2.94118	Flake	Polyhedron	angular	no	fine-grained	1	Fe_Ex28	Two	Short + Long	3 - Exhausted	Perpendicular	flake, bladelet	Delpiano	Hammer2	Anvil1_lab	Hard	394
2	Fe_Ex28	Fragmented	Distal	12	8	1.5	5	Production	Flake	0		Rectangular triangle	Rectilinear	Feather			1-Unidirectional		Ferrara	13	Fe28	Chert	50	39	17	33.1	1.28205	2.94118	Flake	Polyhedron	angular	no	fine-grained	1	Fe_Ex28	Two	Short + Long	3 - Exhausted	Perpendicular	flake, bladelet	Delpiano	Hammer2	Anvil1_lab	Hard	394
2	Fe_Ex28	Integer	Integer	26	12	2.16667	6	Production	Spall	0		Rectangular triangle	Twisted	Plunging			1-Unidirectional		Ferrara	13	Fe28	Chert	50	39	17	33.1	1.28205	2.94118	Flake	Polyhedron	angular	no	fine-grained	1	Fe_Ex28	Two	Short + Long	3 - Exhausted	Perpendicular	flake, bladelet	Delpiano	Hammer2	Anvil1_lab	Hard	394
2	Fe_Ex28	Integer	Integer	17	9	1.88889	2	Production	Flake	0		Rectangular triangle	Concave	Feather			5-Perpendicular		Ferrara	13	Fe28	Chert	50	39	17	33.1	1.28205	2.94118	Flake	Polyhedron	angular	no	fine-grained	1	Fe_Ex28	Two	Short + Long	3 - Exhausted	Perpendicular	flake, bladelet	Delpiano	Hammer2	Anvil1_lab	Hard	394
2	Fe_Ex28	Fragmented	Proximal	13	6	2.16667	1	Production	Bladelet	0		Triangular	Twisted	Broken			5-Perpendicular		Ferrara	13	Fe28	Chert	50	39	17	33.1	1.28205	2.94118	Flake	Polyhedron	angular	no	fine-grained	1	Fe_Ex28	Two	Short + Long	3 - Exhausted	Perpendicular	flake, bladelet	Delpiano	Hammer2	Anvil1_lab	Hard	394
2	Fe_Ex28	Fragmented	Meso-Distal	18	5	3.6	1	Production	Bladelet	0		Triangular	Concave	Feather			1-Unidirectional		Ferrara	13	Fe28	Chert	50	39	17	33.1	1.28205	2.94118	Flake	Polyhedron	angular	no	fine-grained	1	Fe_Ex28	Two	Short + Long	3 - Exhausted	Perpendicular	flake, bladelet	Delpiano	Hammer2	Anvil1_lab	Hard	394
2	Fe_Ex28	Fragmented	Distal	17	9	1.88889	1	Production	Flake	0		Triangular	Rectilinear	Feather			Indet		Ferrara	13	Fe28	Chert	50	39	17	33.1	1.28205	2.94118	Flake	Polyhedron	angular	no	fine-grained	1	Fe_Ex28	Two	Short + Long	3 - Exhausted	Perpendicular	flake, bladelet	Delpiano	Hammer2	Anvil1_lab	Hard	394
2	Fe_Ex28	Fragmented	Distal	13	8	1.625	3	Production	Flake	0		Triangular	Concave	Feather			Indet		Ferrara	13	Fe28	Chert	50	39	17	33.1	1.28205	2.94118	Flake	Polyhedron	angular	no	fine-grained	1	Fe_Ex28	Two	Short + Long	3 - Exhausted	Perpendicular	flake, bladelet	Delpiano	Hammer2	Anvil1_lab	Hard	394
0	Fe_Ex29	Integer	Integer	24	23	1.04348	7	Final	Core	0		Rectangular Trapeze			flatparalelepiped	2	2-Bidirectional		Ferrara	12	Fe29	Chert	47	29	12	14.5	1.62069	3.91667	Flake	Polyhedron	angular	no	fine-grained	1	Fe_Ex29	One	Long	3 - Exhausted	Perpendicular, oblique	flake, bladelet	Delpiano	Hammer2	Anvil1_lab	Hard	394
1	Fe_Ex29	Fragmented	Meso-Proximal	23	9	2.55556	3	Production	Bladelet	0		Triangular	Wavy	Broken			1-Unidirectional		Ferrara	12	Fe29	Chert	47	29	12	14.5	1.62069	3.91667	Flake	Polyhedron	angular	no	fine-grained	1	Fe_Ex29	One	Long	3 - Exhausted	Perpendicular, oblique	flake, bladelet	Delpiano	Hammer2	Anvil1_lab	Hard	394
1	Fe_Ex29	Fragmented	Distal	13	3	4.33333	1	Production	Bladelet	0		Triangular	Concave	Feather			1-Unidirectional		Ferrara	12	Fe29	Chert	47	29	12	14.5	1.62069	3.91667	Flake	Polyhedron	angular	no	fine-grained	1	Fe_Ex29	One	Long	3 - Exhausted	Perpendicular, oblique	flake, bladelet	Delpiano	Hammer2	Anvil1_lab	Hard	394
1	Fe_Ex29	Integer	Integer	14	14	1	2	Production	Flake	1-25	Proximal	Linear	Concave	Feather			Indet		Ferrara	12	Fe29	Chert	47	29	12	14.5	1.62069	3.91667	Flake	Polyhedron	angular	no	fine-grained	1	Fe_Ex29	One	Long	3 - Exhausted	Perpendicular, oblique	flake, bladelet	Delpiano	Hammer2	Anvil1_lab	Hard	394
1	Fe_Ex29	Integer	Integer	11	17	0.647059	2	Production	Flake	0		Linear	Rectilinear	Feather			Indet		Ferrara	12	Fe29	Chert	47	29	12	14.5	1.62069	3.91667	Flake	Polyhedron	angular	no	fine-grained	1	Fe_Ex29	One	Long	3 - Exhausted	Perpendicular, oblique	flake, bladelet	Delpiano	Hammer2	Anvil1_lab	Hard	394
1	Fe_Ex29	Integer	Integer	12	7	1.71429	1	Production	Flake	0		Triangular	Rectilinear	Hinged			Indet		Ferrara	12	Fe29	Chert	47	29	12	14.5	1.62069	3.91667	Flake	Polyhedron	angular	no	fine-grained	1	Fe_Ex29	One	Long	3 - Exhausted	Perpendicular, oblique	flake, bladelet	Delpiano	Hammer2	Anvil1_lab	Hard	394
2	Fe_Ex29	Integer	Integer	8	15	0.533333	4	Maintenance	Flake	0		Rectangular triangle	Concave	Feather			Indet		Ferrara	12	Fe29	Chert	47	29	12	14.5	1.62069	3.91667	Flake	Polyhedron	angular	no	fine-grained	1	Fe_Ex29	One	Long	3 - Exhausted	Perpendicular, oblique	flake, bladelet	Delpiano	Hammer2	Anvil1_lab	Hard	394
2	Fe_Ex29	Integer	Integer	10	10	1	1	Maintenance	Flake	0		Linear	Concave	Feather			Indet		Ferrara	12	Fe29	Chert	47	29	12	14.5	1.62069	3.91667	Flake	Polyhedron	angular	no	fine-grained	1	Fe_Ex29	One	Long	3 - Exhausted	Perpendicular, oblique	flake, bladelet	Delpiano	Hammer2	Anvil1_lab	Hard	394
3	Fe_Ex29	Integer	Integer	27	16	1.6875	4	Production	Flake	0		Rectangular Trapeze	Wavy	Feather			2-Bidirectional		Ferrara	12	Fe29	Chert	47	29	12	14.5	1.62069	3.91667	Flake	Polyhedron	angular	no	fine-grained	1	Fe_Ex29	One	Long	3 - Exhausted	Perpendicular, oblique	flake, bladelet	Delpiano	Hammer2	Anvil1_lab	Hard	394
3	Fe_Ex29	Integer	Integer	26	20	1.3	4	Production	Flake	0		Triangular	Concave	Plunging			2-Bidirectional		Ferrara	12	Fe29	Chert	47	29	12	14.5	1.62069	3.91667	Flake	Polyhedron	angular	no	fine-grained	1	Fe_Ex29	One	Long	3 - Exhausted	Perpendicular, oblique	flake, bladelet	Delpiano	Hammer2	Anvil1_lab	Hard	394
3	Fe_Ex29	Integer	Integer	8	15	0.533333	2	Production	Flake	0		Linear	Convex	Hinged			Indet		Ferrara	12	Fe29	Chert	47	29	12	14.5	1.62069	3.91667	Flake	Polyhedron	angular	no	fine-grained	1	Fe_Ex29	One	Long	3 - Exhausted	Perpendicular, oblique	flake, bladelet	Delpiano	Hammer2	Anvil1_lab	Hard	394
3	Fe_Ex29	Integer	Integer	11	14	0.785714	2	Production	Flake	0		Linear	Wavy	Feather			Indet		Ferrara	12	Fe29	Chert	47	29	12	14.5	1.62069	3.91667	Flake	Polyhedron	angular	no	fine-grained	1	Fe_Ex29	One	Long	3 - Exhausted	Perpendicular, oblique	flake, bladelet	Delpiano	Hammer2	Anvil1_lab	Hard	394
1	Fe_Ex30	Integer	Integer	39	4	9.75	6	Production	Flake	1-25	Proximal	Irregular		Feather			1-Unidirectional		Ferrara	13	Fe30a	Chert	51	40	14	36.7	1.275	3.64286	Flake	Polyhedron	angular	no	fine-grained	2	Fe_Ex30a, Fe_Ex30b	One	Long	3 - Exhausted	Perpendicular	flake, bladelet	Delpiano	Hammer2	Anvil1_lab	Hard	394
1	Fe_Ex30	Integer	Integer	21	30	0.7	3	Production	Flake	0		Linear		Hinged			Indet		Ferrara	13	Fe30a	Chert	51	40	14	36.7	1.275	3.64286	Flake	Polyhedron	angular	no	fine-grained	2	Fe_Ex30a, Fe_Ex30b	One	Long	3 - Exhausted	Perpendicular	flake, bladelet	Delpiano	Hammer2	Anvil1_lab	Hard	394
1	Fe_Ex30	Integer	Integer	16	8	2	1	Production	Bladelet	0		Linear		Feather			1-Unidirectional		Ferrara	13	Fe30a	Chert	51	40	14	36.7	1.275	3.64286	Flake	Polyhedron	angular	no	fine-grained	2	Fe_Ex30a, Fe_Ex30b	One	Long	3 - Exhausted	Perpendicular	flake, bladelet	Delpiano	Hammer2	Anvil1_lab	Hard	394
1	Fe_Ex30	Integer	Integer	11	14	0.785714	1	Production	Flake	1-25	Proximal	Linear	Convex	Hinged			Indet		Ferrara	13	Fe30a	Chert	51	40	14	36.7	1.275	3.64286	Flake	Polyhedron	angular	no	fine-grained	2	Fe_Ex30a, Fe_Ex30b	One	Long	3 - Exhausted	Perpendicular	flake, bladelet	Delpiano	Hammer2	Anvil1_lab	Hard	394
2	Fe_Ex30a	Integer	Integer	26	13	2	11	Final	Core	1-25	Mesial	Trapeze			flatparalelepiped	4	2-Bidirectional		Ferrara	13	Fe30a	Chert	51	40	14	36.7	1.275	3.64286	Flake	Polyhedron	angular	no	fine-grained	2	Fe_Ex30a, Fe_Ex30b	One	Long	3 - Exhausted	Perpendicular	flake, bladelet	Delpiano	Hammer2	Anvil1_lab	Hard	394
2	Fe_Ex30a	Integer	Integer	38	14	2.71429	9	Production	Spall	1-25	Distal	Triangular	Convex	Plunging			2-Bidirectional		Ferrara	13	Fe30a	Chert	51	40	14	36.7	1.275	3.64286	Flake	Polyhedron	angular	no	fine-grained	2	Fe_Ex30a, Fe_Ex30b	One	Long	3 - Exhausted	Perpendicular	flake, bladelet	Delpiano	Hammer2	Anvil1_lab	Hard	394
2	Fe_Ex30a	Integer	Integer	35	10	3.5	5	Production	Bladelet	0		Triangular	Wavy	Feather			2-Bidirectional		Ferrara	13	Fe30a	Chert	51	40	14	36.7	1.275	3.64286	Flake	Polyhedron	angular	no	fine-grained	2	Fe_Ex30a, Fe_Ex30b	One	Long	3 - Exhausted	Perpendicular	flake, bladelet	Delpiano	Hammer2	Anvil1_lab	Hard	394
2	Fe_Ex30a	Integer	Integer	19	10	1.9	3	Production	Bladelet	1-25	Lateral	Triangular	Concave	Feather			2-Bidirectional		Ferrara	13	Fe30a	Chert	51	40	14	36.7	1.275	3.64286	Flake	Polyhedron	angular	no	fine-grained	2	Fe_Ex30a, Fe_Ex30b	One	Long	3 - Exhausted	Perpendicular	flake, bladelet	Delpiano	Hammer2	Anvil1_lab	Hard	394
2	Fe_Ex30a	Integer	Integer	18	8	2.25	1	Production	Bladelet	0		Linear	Concave	Feather			Indet		Ferrara	13	Fe30a	Chert	51	40	14	36.7	1.275	3.64286	Flake	Polyhedron	angular	no	fine-grained	2	Fe_Ex30a, Fe_Ex30b	One	Long	3 - Exhausted	Perpendicular	flake, bladelet	Delpiano	Hammer2	Anvil1_lab	Hard	394
2	Fe_Ex30a	Fragmented	Meso-Distal	22	8	2.75	3	Production	Bladelet	0		Triangular	Twisted	Hinged			Indet		Ferrara	13	Fe30a	Chert	51	40	14	36.7	1.275	3.64286	Flake	Polyhedron	angular	no	fine-grained	2	Fe_Ex30a, Fe_Ex30b	One	Long	3 - Exhausted	Perpendicular	flake, bladelet	Delpiano	Hammer2	Anvil1_lab	Hard	394
2	Fe_Ex30a	Integer	Integer	15	6	2.5	1	Production	Bladelet	0		Triangular	Concave	Feather			1-Unidirectional		Ferrara	13	Fe30a	Chert	51	40	14	36.7	1.275	3.64286	Flake	Polyhedron	angular	no	fine-grained	2	Fe_Ex30a, Fe_Ex30b	One	Long	3 - Exhausted	Perpendicular	flake, bladelet	Delpiano	Hammer2	Anvil1_lab	Hard	394
2	Fe_Ex30a	Fragmented	Meso-Distal	16	6	2.66667	2	Production	Bladelet	0		Triangular	Twisted	Feather			Indet		Ferrara	13	Fe30a	Chert	51	40	14	36.7	1.275	3.64286	Flake	Polyhedron	angular	no	fine-grained	2	Fe_Ex30a, Fe_Ex30b	One	Long	3 - Exhausted	Perpendicular	flake, bladelet	Delpiano	Hammer2	Anvil1_lab	Hard	394
2	Fe_Ex30a	Integer	Integer	17	12	1.41667	4	Production	Flake	0		Triangular	Convex	Hinged			5-Perpendicular		Ferrara	13	Fe30a	Chert	51	40	14	36.7	1.275	3.64286	Flake	Polyhedron	angular	no	fine-grained	2	Fe_Ex30a, Fe_Ex30b	One	Long	3 - Exhausted	Perpendicular	flake, bladelet	Delpiano	Hammer2	Anvil1_lab	Hard	394
3	Fe_Ex30b	Integer	Integer	28	18	1.55556	7	Final	Core	0		Rectangular triangle			flatparalelepiped	3	2-Bidirectional		Ferrara	15	Fe30b	Chert	51	40	14	36.7	1.275	3.64286	Flake	Polyhedron	angular	no	fine-grained	2	Fe_Ex30a, Fe_Ex30b	One	Long	3 - Exhausted	Perpendicular	flake, bladelet	Delpiano	Hammer2	Anvil1_lab	Hard	394
3	Fe_Ex30b	Integer	Integer	39	10	3.9	6	Production	Spall	0		Triangular	Twisted	Plunging			2-Bidirectional		Ferrara	15	Fe30b	Chert	51	40	14	36.7	1.275	3.64286	Flake	Polyhedron	angular	no	fine-grained	2	Fe_Ex30a, Fe_Ex30b	One	Long	3 - Exhausted	Perpendicular	flake, bladelet	Delpiano	Hammer2	Anvil1_lab	Hard	394
3	Fe_Ex30b	Fragmented	Meso-Distal	21	9	2.33333	4	Production	Spall	0		Rectangular Trapeze	Twisted	Plunging			2-Bidirectional		Ferrara	15	Fe30b	Chert	51	40	14	36.7	1.275	3.64286	Flake	Polyhedron	angular	no	fine-grained	2	Fe_Ex30a, Fe_Ex30b	One	Long	3 - Exhausted	Perpendicular	flake, bladelet	Delpiano	Hammer2	Anvil1_lab	Hard	394
3	Fe_Ex30b	Integer	Integer	31	4	7.75	3	Production	Spall	0		Rectangular triangle	Twisted	Feather			1-Unidirectional		Ferrara	15	Fe30b	Chert	51	40	14	36.7	1.275	3.64286	Flake	Polyhedron	angular	no	fine-grained	2	Fe_Ex30a, Fe_Ex30b	One	Long	3 - Exhausted	Perpendicular	flake, bladelet	Delpiano	Hammer2	Anvil1_lab	Hard	394
3	Fe_Ex30b	Integer	Integer	22	8	2.75	3	Production	Bladelet	0		Triangular	Twisted	Hinged			1-Unidirectional		Ferrara	15	Fe30b	Chert	51	40	14	36.7	1.275	3.64286	Flake	Polyhedron	angular	no	fine-grained	2	Fe_Ex30a, Fe_Ex30b	One	Long	3 - Exhausted	Perpendicular	flake, bladelet	Delpiano	Hammer2	Anvil1_lab	Hard	394
3	Fe_Ex30b	Fragmented	Meso-Proximal	20	8	2.5	6	Production	Spall	0		Rectangular Trapeze	Concave	Broken			1-Unidirectional		Ferrara	15	Fe30b	Chert	51	40	14	36.7	1.275	3.64286	Flake	Polyhedron	angular	no	fine-grained	2	Fe_Ex30a, Fe_Ex30b	One	Long	3 - Exhausted	Perpendicular	flake, bladelet	Delpiano	Hammer2	Anvil1_lab	Hard	394
3	Fe_Ex30b	Integer	Integer	18	6	3	2	Production	Bladelet	0		Triangular	Rectilinear	Feather			1-Unidirectional		Ferrara	15	Fe30b	Chert	51	40	14	36.7	1.275	3.64286	Flake	Polyhedron	angular	no	fine-grained	2	Fe_Ex30a, Fe_Ex30b	One	Long	3 - Exhausted	Perpendicular	flake, bladelet	Delpiano	Hammer2	Anvil1_lab	Hard	394
3	Fe_Ex30b	Fragmented	Meso-Distal	17	4	4.25	1	Production	Bladelet	0		Linear	Concave	Feather			Indet		Ferrara	15	Fe30b	Chert	51	40	14	36.7	1.275	3.64286	Flake	Polyhedron	angular	no	fine-grained	2	Fe_Ex30a, Fe_Ex30b	One	Long	3 - Exhausted	Perpendicular	flake, bladelet	Delpiano	Hammer2	Anvil1_lab	Hard	394
3	Fe_Ex30b	Integer	Integer	13	2	6.5	1	Production	Bladelet	0		Linear	Wavy	Feather			Indet		Ferrara	15	Fe30b	Chert	51	40	14	36.7	1.275	3.64286	Flake	Polyhedron	angular	no	fine-grained	2	Fe_Ex30a, Fe_Ex30b	One	Long	3 - Exhausted	Perpendicular	flake, bladelet	Delpiano	Hammer2	Anvil1_lab	Hard	394
3	Fe_Ex30b	Integer	Integer	13	4	3.25	1	Production	Bladelet	0		Triangular	Rectilinear	Feather			Indet		Ferrara	15	Fe30b	Chert	51	40	14	36.7	1.275	3.64286	Flake	Polyhedron	angular	no	fine-grained	2	Fe_Ex30a, Fe_Ex30b	One	Long	3 - Exhausted	Perpendicular	flake, bladelet	Delpiano	Hammer2	Anvil1_lab	Hard	394
3	Fe_Ex30b	Fragmented	Meso-Distal	20	9	2.22222	1	Production	Bladelet	0		Linear	Rectilinear	Feather			Indet		Ferrara	15	Fe30b	Chert	51	40	14	36.7	1.275	3.64286	Flake	Polyhedron	angular	no	fine-grained	2	Fe_Ex30a, Fe_Ex30b	One	Long	3 - Exhausted	Perpendicular	flake, bladelet	Delpiano	Hammer2	Anvil1_lab	Hard	394
3	Fe_Ex30b	Integer	Integer	14	4	3.5	2	Production	Bladelet	0		Triangular	Wavy	Feather			Indet		Ferrara	15	Fe30b	Chert	51	40	14	36.7	1.275	3.64286	Flake	Polyhedron	angular	no	fine-grained	2	Fe_Ex30a, Fe_Ex30b	One	Long	3 - Exhausted	Perpendicular	flake, bladelet	Delpiano	Hammer2	Anvil1_lab	Hard	394
3	Fe_Ex30b	Integer	Integer	21	10	2.1	4	Production	Flake	0		Trapeze	Convex	Hinged			2-Bidirectional		Ferrara	15	Fe30b	Chert	51	40	14	36.7	1.275	3.64286	Flake	Polyhedron	angular	no	fine-grained	2	Fe_Ex30a, Fe_Ex30b	One	Long	3 - Exhausted	Perpendicular	flake, bladelet	Delpiano	Hammer2	Anvil1_lab	Hard	394
3	Fe_Ex30b	Fragmented	Distal	15	9	1.66667	2	Production	Flake	0		Rectangular Trapeze	Rectilinear	Hinged			1-Unidirectional		Ferrara	15	Fe30b	Chert	51	40	14	36.7	1.275	3.64286	Flake	Polyhedron	angular	no	fine-grained	2	Fe_Ex30a, Fe_Ex30b	One	Long	3 - Exhausted	Perpendicular	flake, bladelet	Delpiano	Hammer2	Anvil1_lab	Hard	394
3	Fe_Ex30b	Integer	Integer	15	10	1.5	1	Production	Flake	1-25	Proximal	Linear	Rectilinear	Feather			Indet		Ferrara	15	Fe30b	Chert	51	40	14	36.7	1.275	3.64286	Flake	Polyhedron	angular	no	fine-grained	2	Fe_Ex30a, Fe_Ex30b	One	Long	3 - Exhausted	Perpendicular	flake, bladelet	Delpiano	Hammer2	Anvil1_lab	Hard	394
0	Fe_Ex31	Integer	Integer	23	23	1	7	Final	Core	0		Trapeze			flatparalelepiped	2	2-Bidirectional		Ferrara	16	Fe31	Chert	55	38	12		1.44737	4.58333	Flake	Polyhedron	angular	no	fine-grained	1	Fe_Ex31	One	Long	3 - Exhausted	Perpendicular	flake, bladelet	Delpiano	Hammer2	Anvil1_lab	Hard	394
1	Fe_Ex31	Integer	Integer	23	29	0.793103	6	Production	Flake	1-25	Proximal	Rectangular Trapeze	Convex	Feather			1-Unidirectional		Ferrara	16	Fe31	Chert	55	38	12		1.44737	4.58333	Flake	Polyhedron	angular	no	fine-grained	1	Fe_Ex31	One	Long	3 - Exhausted	Perpendicular	flake, bladelet	Delpiano	Hammer2	Anvil1_lab	Hard	394
2	Fe_Ex31	Fragmented	Meso-Proximal	17	6	2.83333	3	Production	Spall	0		Triangular	Twisted	Broken			1-Unidirectional		Ferrara	16	Fe31	Chert	55	38	12		1.44737	4.58333	Flake	Polyhedron	angular	no	fine-grained	1	Fe_Ex31	One	Long	3 - Exhausted	Perpendicular	flake, bladelet	Delpiano	Hammer2	Anvil1_lab	Hard	394
3	Fe_Ex31	Fragmented	Distal	15	3	5	2	Production	Bladelet	0		Triangular	Concave	Feather			Indet		Ferrara	16	Fe31	Chert	55	38	12		1.44737	4.58333	Flake	Polyhedron	angular	no	fine-grained	1	Fe_Ex31	One	Long	3 - Exhausted	Perpendicular	flake, bladelet	Delpiano	Hammer2	Anvil1_lab	Hard	394
4	Fe_Ex31	Fragmented	Distal	13	3	4.33333	1	Production	Bladelet	0		Linear	Rectilinear	Feather			Indet		Ferrara	16	Fe31	Chert	55	38	12		1.44737	4.58333	Flake	Polyhedron	angular	no	fine-grained	1	Fe_Ex31	One	Long	3 - Exhausted	Perpendicular	flake, bladelet	Delpiano	Hammer2	Anvil1_lab	Hard	394
5	Fe_Ex31	Integer	Integer	25	10	2.5	5	Production	Spall	0		Triangular	Wavy	Plunging			2-Bidirectional		Ferrara	16	Fe31	Chert	55	38	12		1.44737	4.58333	Flake	Polyhedron	angular	no	fine-grained	1	Fe_Ex31	One	Long	3 - Exhausted	Perpendicular	flake, bladelet	Delpiano	Hammer2	Anvil1_lab	Hard	394
6	Fe_Ex31	Integer	Integer	27	10	2.7	8	Production	Spall	0		Rectangular Trapeze	Convex	Plunging			2-Bidirectional		Ferrara	16	Fe31	Chert	55	38	12		1.44737	4.58333	Flake	Polyhedron	angular	no	fine-grained	1	Fe_Ex31	One	Long	3 - Exhausted	Perpendicular	flake, bladelet	Delpiano	Hammer2	Anvil1_lab	Hard	394
7	Fe_Ex31	Integer	Integer	20	20	1	5	Production	Flake	0		Linear	Wavy	Feather			2-Bidirectional		Ferrara	16	Fe31	Chert	55	38	12		1.44737	4.58333	Flake	Polyhedron	angular	no	fine-grained	1	Fe_Ex31	One	Long	3 - Exhausted	Perpendicular	flake, bladelet	Delpiano	Hammer2	Anvil1_lab	Hard	394
8	Fe_Ex31	Fragmented	Mesial	13	14	0.928571	4	Production	Flake	0		Triangular	Rectilinear	Broken			1-Unidirectional		Ferrara	16	Fe31	Chert	55	38	12		1.44737	4.58333	Flake	Polyhedron	angular	no	fine-grained	1	Fe_Ex31	One	Long	3 - Exhausted	Perpendicular	flake, bladelet	Delpiano	Hammer2	Anvil1_lab	Hard	394
9	Fe_Ex31	Fragmented	Proximal	12	13	0.923077	3	Production	Flake	0		Triangular	Rectilinear	Broken			1-Unidirectional		Ferrara	16	Fe31	Chert	55	38	12		1.44737	4.58333	Flake	Polyhedron	angular	no	fine-grained	1	Fe_Ex31	One	Long	3 - Exhausted	Perpendicular	flake, bladelet	Delpiano	Hammer2	Anvil1_lab	Hard	394
10	Fe_Ex31	Integer	Integer	7	16	0.4375	3	Production	Flake	0		Linear	Convex	Hinged			1-Unidirectional		Ferrara	16	Fe31	Chert	55	38	12		1.44737	4.58333	Flake	Polyhedron	angular	no	fine-grained	1	Fe_Ex31	One	Long	3 - Exhausted	Perpendicular	flake, bladelet	Delpiano	Hammer2	Anvil1_lab	Hard	394
11	Fe_Ex31	Integer	Integer	8	20	0.4	2	Production	Flake	0		Linear	Convex	Hinged			Indet		Ferrara	16	Fe31	Chert	55	38	12		1.44737	4.58333	Flake	Polyhedron	angular	no	fine-grained	1	Fe_Ex31	One	Long	3 - Exhausted	Perpendicular	flake, bladelet	Delpiano	Hammer2	Anvil1_lab	Hard	394
12	Fe_Ex31	Integer	Integer	11	9	1.22222	1	Production	Flake	0		Linear	Rectilinear	Feather			Indet		Ferrara	16	Fe31	Chert	55	38	12		1.44737	4.58333	Flake	Polyhedron	angular	no	fine-grained	1	Fe_Ex31	One	Long	3 - Exhausted	Perpendicular	flake, bladelet	Delpiano	Hammer2	Anvil1_lab	Hard	394
13	Fe_Ex31	Integer	Integer	12	9	1.33333	1	Production	Flake	0		Linear	Rectilinear	Feather			Indet		Ferrara	16	Fe31	Chert	55	38	12		1.44737	4.58333	Flake	Polyhedron	angular	no	fine-grained	1	Fe_Ex31	One	Long	3 - Exhausted	Perpendicular	flake, bladelet	Delpiano	Hammer2	Anvil1_lab	Hard	394
14	Fe_Ex31	Integer	Integer	12	7	1.71429	1	Production	Flake	0		Linear	Wavy	Feather			1-Unidirectional		Ferrara	16	Fe31	Chert	55	38	12		1.44737	4.58333	Flake	Polyhedron	angular	no	fine-grained	1	Fe_Ex31	One	Long	3 - Exhausted	Perpendicular	flake, bladelet	Delpiano	Hammer2	Anvil1_lab	Hard	394
15	Fe_Ex31	Integer	Integer	13	7	1.85714	1	Production	Flake	0		Linear	Convex	Feather			Indet		Ferrara	16	Fe31	Chert	55	38	12		1.44737	4.58333	Flake	Polyhedron	angular	no	fine-grained	1	Fe_Ex31	One	Long	3 - Exhausted	Perpendicular	flake, bladelet	Delpiano	Hammer2	Anvil1_lab	Hard	394
1	Fe_Ex32	Integer	Integer	28	12	2.33333	3	Production	Spall	0		Rectangular triangle	Concave	Plunging			5-Perpendicular		Ferrara	16	Fe32	Chert	43	47	15		0.914894	2.86667	Flake	Polyhedron	angular	no	fine-grained	1	Fe_Ex32	Two	Short + Long	3 - Exhausted	Perpendicular, oblique	flake, bladelet	Delpiano	Hammer2	Anvil1_lab	Hard	394
1	Fe_Ex32	Integer	Integer	20	14	1.42857	4	Production	Flake	0		Rectangular triangle	Rectilinear	Feather			1-Unidirectional		Ferrara	16	Fe32	Chert	43	47	15		0.914894	2.86667	Flake	Polyhedron	angular	no	fine-grained	1	Fe_Ex32	Two	Short + Long	3 - Exhausted	Perpendicular, oblique	flake, bladelet	Delpiano	Hammer2	Anvil1_lab	Hard	394
1	Fe_Ex32	Integer	Integer	15	13	1.15385	1	Production	Flake	0		Linear	Rectilinear	Feather			Indet		Ferrara	16	Fe32	Chert	43	47	15		0.914894	2.86667	Flake	Polyhedron	angular	no	fine-grained	1	Fe_Ex32	Two	Short + Long	3 - Exhausted	Perpendicular, oblique	flake, bladelet	Delpiano	Hammer2	Anvil1_lab	Hard	394
1	Fe_Ex32	Integer	Integer	13	11	1.18182	3	Production	Flake	26-50	Lateral	Triangular	Convex	Hinged			Indet		Ferrara	16	Fe32	Chert	43	47	15		0.914894	2.86667	Flake	Polyhedron	angular	no	fine-grained	1	Fe_Ex32	Two	Short + Long	3 - Exhausted	Perpendicular, oblique	flake, bladelet	Delpiano	Hammer2	Anvil1_lab	Hard	394
1	Fe_Ex32	Integer	Integer	11	5	2.2	1	Production	Flake	0		Linear	Concave	Feather			Indet		Ferrara	16	Fe32	Chert	43	47	15		0.914894	2.86667	Flake	Polyhedron	angular	no	fine-grained	1	Fe_Ex32	Two	Short + Long	3 - Exhausted	Perpendicular, oblique	flake, bladelet	Delpiano	Hammer2	Anvil1_lab	Hard	394
1	Fe_Ex32	Integer	Integer	13	7	1.85714	1	Production	Flake	0		Linear	Rectilinear	Feather			Indet		Ferrara	16	Fe32	Chert	43	47	15		0.914894	2.86667	Flake	Polyhedron	angular	no	fine-grained	1	Fe_Ex32	Two	Short + Long	3 - Exhausted	Perpendicular, oblique	flake, bladelet	Delpiano	Hammer2	Anvil1_lab	Hard	394
2	Fe_Ex32	Integer	Integer	23	4	5.75	4	Production	Spall	0		Triangular	Wavy	Feather			1-Unidirectional		Ferrara	16	Fe32	Chert	43	47	15		0.914894	2.86667	Flake	Polyhedron	angular	no	fine-grained	1	Fe_Ex32	Two	Short + Long	3 - Exhausted	Perpendicular, oblique	flake, bladelet	Delpiano	Hammer2	Anvil1_lab	Hard	394
2	Fe_Ex32	Integer	Integer	16	15	1.06667	3	Production	Flake	0		Linear	Concave	Feather			1-Unidirectional		Ferrara	16	Fe32	Chert	43	47	15		0.914894	2.86667	Flake	Polyhedron	angular	no	fine-grained	1	Fe_Ex32	Two	Short + Long	3 - Exhausted	Perpendicular, oblique	flake, bladelet	Delpiano	Hammer2	Anvil1_lab	Hard	394
2	Fe_Ex32	Integer	Integer	12	11	1.09091	2	Production	Flake	0		Linear	Wavy	Feather			1-Unidirectional		Ferrara	16	Fe32	Chert	43	47	15		0.914894	2.86667	Flake	Polyhedron	angular	no	fine-grained	1	Fe_Ex32	Two	Short + Long	3 - Exhausted	Perpendicular, oblique	flake, bladelet	Delpiano	Hammer2	Anvil1_lab	Hard	394
2	Fe_Ex32	Integer	Integer	15	10	1.5	4	Production	Flake	0		Triangular	Concave	Feather			1-Unidirectional		Ferrara	16	Fe32	Chert	43	47	15		0.914894	2.86667	Flake	Polyhedron	angular	no	fine-grained	1	Fe_Ex32	Two	Short + Long	3 - Exhausted	Perpendicular, oblique	flake, bladelet	Delpiano	Hammer2	Anvil1_lab	Hard	394
2	Fe_Ex32	Integer	Integer	17	10	1.7	5	Production	Flake	0		Triangular	Rectilinear	Feather			1-Unidirectional		Ferrara	16	Fe32	Chert	43	47	15		0.914894	2.86667	Flake	Polyhedron	angular	no	fine-grained	1	Fe_Ex32	Two	Short + Long	3 - Exhausted	Perpendicular, oblique	flake, bladelet	Delpiano	Hammer2	Anvil1_lab	Hard	394
2	Fe_Ex32	Integer	Integer	15	8	1.875	5	Production	Flake	0		Triangular	Rectilinear	Feather			1-Unidirectional		Ferrara	16	Fe32	Chert	43	47	15		0.914894	2.86667	Flake	Polyhedron	angular	no	fine-grained	1	Fe_Ex32	Two	Short + Long	3 - Exhausted	Perpendicular, oblique	flake, bladelet	Delpiano	Hammer2	Anvil1_lab	Hard	394
2	Fe_Ex32	Integer	Integer	13	5	2.6	1	Production	Bladelet	0		Triangular	Rectilinear	Feather			Indet		Ferrara	16	Fe32	Chert	43	47	15		0.914894	2.86667	Flake	Polyhedron	angular	no	fine-grained	1	Fe_Ex32	Two	Short + Long	3 - Exhausted	Perpendicular, oblique	flake, bladelet	Delpiano	Hammer2	Anvil1_lab	Hard	394
2	Fe_Ex32	Integer	Integer	11	9	1.22222	1	Production	Flake	0		Linear	Rectilinear	Feather			Indet		Ferrara	16	Fe32	Chert	43	47	15		0.914894	2.86667	Flake	Polyhedron	angular	no	fine-grained	1	Fe_Ex32	Two	Short + Long	3 - Exhausted	Perpendicular, oblique	flake, bladelet	Delpiano	Hammer2	Anvil1_lab	Hard	394
2	Fe_Ex32	Integer	Integer	29	24	1.20833	6	Production	Backed flake	1-25	Lateral back	Triangular	Rectilinear	Plunging			1-Unidirectional		Ferrara	16	Fe32	Chert	43	47	15		0.914894	2.86667	Flake	Polyhedron	angular	no	fine-grained	1	Fe_Ex32	Two	Short + Long	3 - Exhausted	Perpendicular, oblique	flake, bladelet	Delpiano	Hammer2	Anvil1_lab	Hard	394
2	Fe_Ex32	Integer	Integer	32	23	1.3913	8	Final	Core	26-50	Lateral back	Triangular			flatparalelepiped	2	2-Bidirectional		Ferrara	16	Fe32	Chert	43	47	15		0.914894	2.86667	Flake	Polyhedron	angular	no	fine-grained	1	Fe_Ex32	Two	Short + Long	3 - Exhausted	Perpendicular, oblique	flake, bladelet	Delpiano	Hammer2	Anvil1_lab	Hard	394
34	P1	Integer	Integer	12	10	1.2	2	Production	Flake	0		Linear	Rectilinear	Feather	flat	0	1-Unidirectional		Pisa	42	17	Radiolarite	77	27	18	71	2.8	4.2	Pebble	Polyhedron	angular	inner plan	fine/medium-grained	2	P_1	One	Long	3 - Exhausted	Perpendicular	flake, bladelet	Lombardo	3	3	Hard	528
24	P1	Fragmented	Meso-Distal	11	5	2.2	2	Production	Bladelet	0		Triangular	Rectilinear	Feather	flat	0	1-Unidirectional		Pisa	42	17	Radiolarite	77	27	18	71	2.8	4.2	Pebble	Polyhedron	angular	inner plan	fine/medium-grained	2	P_1	One	Long	3 - Exhausted	Perpendicular	flake, bladelet	Lombardo	3	3	Hard	528
25	P1	Integer	Integer	16	3	5.33333	2	Production	Bladelet	0		Triangular	Twisted	Plunging	flat	0	1-Unidirectional		Pisa	42	17	Radiolarite	77	27	18	71	2.8	4.2	Pebble	Polyhedron	angular	inner plan	fine/medium-grained	2	P_1	One	Long	3 - Exhausted	Perpendicular	flake, bladelet	Lombardo	3	3	Hard	528
26	P1	Integer	Integer	12	4	3	1	Production	Bladelet	0		Triangular	Rectilinear	Feather	flat	0	1-Unidirectional		Pisa	42	17	Radiolarite	77	27	18	71	2.8	4.2	Pebble	Polyhedron	angular	inner plan	fine/medium-grained	2	P_1	One	Long	3 - Exhausted	Perpendicular	flake, bladelet	Lombardo	3	3	Hard	528
27	P1	Fragmented	Proximal	6	13	0.461538	3	Production	Flake	0		Linear	Rectilinear	Broken	flat	0	2-Bidirectional		Pisa	42	17	Radiolarite	77	27	18	71	2.8	4.2	Pebble	Polyhedron	angular	inner plan	fine/medium-grained	2	P_1	One	Long	3 - Exhausted	Perpendicular	flake, bladelet	Lombardo	3	3	Hard	528
28	P1	Integer	Integer	18	12	1.5	2	Production	Flake	0		Linear	Rectilinear	Feather	flat	0	1-Unidirectional		Pisa	42	17	Radiolarite	77	27	18	71	2.8	4.2	Pebble	Polyhedron	angular	inner plan	fine/medium-grained	2	P_1	One	Long	3 - Exhausted	Perpendicular	flake, bladelet	Lombardo	3	3	Hard	528
29	P1	Integer	Integer	11	6	1.83333	2	Production	Flake	0		Irregular	Wavy	Feather	flat	0	1-Unidirectional		Pisa	42	17	Radiolarite	77	27	18	71	2.8	4.2	Pebble	Polyhedron	angular	inner plan	fine/medium-grained	2	P_1	One	Long	3 - Exhausted	Perpendicular	flake, bladelet	Lombardo	3	3	Hard	528
30	P1	Integer	Integer	13	9	1.44444	4	Production	Flake	0		Triangular	Convex	Broken	flat	0	1-Unidirectional		Pisa	42	17	Radiolarite	77	27	18	71	2.8	4.2	Pebble	Polyhedron	angular	inner plan	fine/medium-grained	2	P_1	One	Long	3 - Exhausted	Perpendicular	flake, bladelet	Lombardo	3	3	Hard	528
31	P1	Integer	Integer	11	10	1.1	1	Initialization	Flake	Total	Total	Linear	Rectilinear	Hinged	flat	0	Indet		Pisa	42	17	Radiolarite	77	27	18	71	2.8	4.2	Pebble	Polyhedron	angular	inner plan	fine/medium-grained	2	P_1	One	Long	3 - Exhausted	Perpendicular	flake, bladelet	Lombardo	3	3	Hard	528
23	P1	Fragmented	Meso-Distal	15	7	2.14286	2	Initialization	Bladelet	51-75	Lateral	Triangular	Rectilinear	Broken	flat	0	1-Unidirectional		Pisa	42	17	Radiolarite	77	27	18	71	2.8	4.2	Pebble	Polyhedron	angular	inner plan	fine/medium-grained	2	P_1	One	Long	3 - Exhausted	Perpendicular	flake, bladelet	Lombardo	3	3	Hard	528
33	P1	Integer	Integer	12	15	0.8	2	Production	Flake	0		Irregular	Wavy	Hinged	poligonal	0	1-Unidirectional		Pisa	42	17	Radiolarite	77	27	18	71	2.8	4.2	Pebble	Polyhedron	angular	inner plan	fine/medium-grained	2	P_1	One	Long	3 - Exhausted	Perpendicular	flake, bladelet	Lombardo	3	3	Hard	528
41	P1	Fragmented	Mesial	12	6	2	1	Production	Flake	0		Linear	Rectilinear	Broken	flat	0	1-Unidirectional		Pisa	42	17	Radiolarite	77	27	18	71	2.8	4.2	Pebble	Polyhedron	angular	inner plan	fine/medium-grained	2	P_1	One	Long	3 - Exhausted	Perpendicular	flake, bladelet	Lombardo	3	3	Hard	528
35	P1	Integer	Integer	14	16	0.875	3	Initialization	Flake	0		Rectangular Trapeze	Wavy	Feather	flatparalelepiped	0	1-Unidirectional		Pisa	42	17	Radiolarite	77	27	18	71	2.8	4.2	Pebble	Polyhedron	angular	inner plan	fine/medium-grained	2	P_1	One	Long	3 - Exhausted	Perpendicular	flake, bladelet	Lombardo	3	3	Hard	528
36	P1	Integer	Integer	15	10	1.5	1	Production	Flake	0		Linear	Rectilinear	Feather	flat	0	1-Unidirectional		Pisa	42	17	Radiolarite	77	27	18	71	2.8	4.2	Pebble	Polyhedron	angular	inner plan	fine/medium-grained	2	P_1	One	Long	3 - Exhausted	Perpendicular	flake, bladelet	Lombardo	3	3	Hard	528
37	P1	Fragmented	Meso-Distal	9	13	0.692308	1	Production	Flake	0		Linear	Rectilinear	Hinged	flat	0	1-Unidirectional		Pisa	42	17	Radiolarite	77	27	18	71	2.8	4.2	Pebble	Polyhedron	angular	inner plan	fine/medium-grained	2	P_1	One	Long	3 - Exhausted	Perpendicular	flake, bladelet	Lombardo	3	3	Hard	528
38	P1	Integer	Integer	13	8	1.625	3	Production	Flake	0		Trapeze	Rectilinear	Broken	flat	0	1-Unidirectional		Pisa	42	17	Radiolarite	77	27	18	71	2.8	4.2	Pebble	Polyhedron	angular	inner plan	fine/medium-grained	2	P_1	One	Long	3 - Exhausted	Perpendicular	flake, bladelet	Lombardo	3	3	Hard	528
39	P1	Integer	Integer	11	8	1.375	2	Production	Flake	0		Linear	Rectilinear	Feather	flat	0	1-Unidirectional		Pisa	42	17	Radiolarite	77	27	18	71	2.8	4.2	Pebble	Polyhedron	angular	inner plan	fine/medium-grained	2	P_1	One	Long	3 - Exhausted	Perpendicular	flake, bladelet	Lombardo	3	3	Hard	528
40	P1	Integer	Integer	11	10	1.1	1	Production	Flake	0		Linear	Rectilinear	Hinged	flat	0	1-Unidirectional		Pisa	42	17	Radiolarite	77	27	18	71	2.8	4.2	Pebble	Polyhedron	angular	inner plan	fine/medium-grained	2	P_1	One	Long	3 - Exhausted	Perpendicular	flake, bladelet	Lombardo	3	3	Hard	528
42	P1	Integer	Integer	13	4	3.25	2	Production	Bladelet	0		Triangular	Rectilinear	Feather	triangular prism	0	1-Unidirectional		Pisa	42	17	Radiolarite	77	27	18	71	2.8	4.2	Pebble	Polyhedron	angular	inner plan	fine/medium-grained	2	P_1	One	Long	3 - Exhausted	Perpendicular	flake, bladelet	Lombardo	3	3	Hard	528
22	P1	Integer	Integer	13	5	2.6	2	Production	Bladelet	0		Triangular	Rectilinear	Broken	flat	0	1-Unidirectional		Pisa	42	17	Radiolarite	77	27	18	71	2.8	4.2	Pebble	Polyhedron	angular	inner plan	fine/medium-grained	2	P_1	One	Long	3 - Exhausted	Perpendicular	flake, bladelet	Lombardo	3	3	Hard	528
1	P1	Integer	Integer	32	15	2.13333	13	Final	Core	0		Trapeze			Truncated pyramid/frustum	1	2-Bidirectional		Pisa	42	17	Radiolarite	77	27	18	71	2.8	4.2	Pebble	Polyhedron	angular	inner plan	fine/medium-grained	2	P_1	One	Long	3 - Exhausted	Perpendicular	flake, bladelet	Lombardo	3	3	Hard	528
32	P1	Integer	Integer	13	14	0.928571	1	Production	Flake	0		Linear	Rectilinear	Feather	flat	0	1-Unidirectional		Pisa	42	17	Radiolarite	77	27	18	71	2.8	4.2	Pebble	Polyhedron	angular	inner plan	fine/medium-grained	2	P_1	One	Long	3 - Exhausted	Perpendicular	flake, bladelet	Lombardo	3	3	Hard	528
8	P1	Integer	Integer	27	16	1.6875	10	Initialization	Flake	Total	Total	Irregular	Convex	Hinged	triangular prism	0	Indet		Pisa	42	17	Radiolarite	77	27	18	71	2.8	4.2	Pebble	Polyhedron	angular	inner plan	fine/medium-grained	2	P_1	One	Long	3 - Exhausted	Perpendicular	flake, bladelet	Lombardo	3	3	Hard	528
17	P1	Fragmented	Meso-Proximal	21	9	2.33333	4	Production	Bladelet	0		Triangular	Rectilinear	Broken	triangular prism	0	2-Bidirectional		Pisa	42	17	Radiolarite	77	27	18	71	2.8	4.2	Pebble	Polyhedron	angular	inner plan	fine/medium-grained	2	P_1	One	Long	3 - Exhausted	Perpendicular	flake, bladelet	Lombardo	3	3	Hard	528
16	P1	Fragmented	Composite	16	10	1.6	5	Production	Chunk	0		Irregular	Convex	Broken	triangular prism	0	4-Multidirectional		Pisa	42	17	Radiolarite	77	27	18	71	2.8	4.2	Pebble	Polyhedron	angular	inner plan	fine/medium-grained	2	P_1	One	Long	3 - Exhausted	Perpendicular	flake, bladelet	Lombardo	3	3	Hard	528
15	P1	Integer	Integer	18	22	0.818182	5	Production	Flake	0		Irregular	Wavy	Hinged	Truncated pyramid/frustum	0	1-Unidirectional		Pisa	42	17	Radiolarite	77	27	18	71	2.8	4.2	Pebble	Polyhedron	angular	inner plan	fine/medium-grained	2	P_1	One	Long	3 - Exhausted	Perpendicular	flake, bladelet	Lombardo	3	3	Hard	528
14	P1	Integer	Integer	34	8	4.25	4	Initialization	Bladelet	51-75	Semi-total	Triangular	Rectilinear	Hinged	triangular prism	0	1-Unidirectional		Pisa	42	17	Radiolarite	77	27	18	71	2.8	4.2	Pebble	Polyhedron	angular	inner plan	fine/medium-grained	2	P_1	One	Long	3 - Exhausted	Perpendicular	flake, bladelet	Lombardo	3	3	Hard	528
13	P1	Fragmented	Meso-Distal	34	18	1.88889	16	Production	Blade	26-50	Semi-total	Linear	Rectilinear	Feather	triangular prism	0	2-Bidirectional		Pisa	42	17	Radiolarite	77	27	18	71	2.8	4.2	Pebble	Polyhedron	angular	inner plan	fine/medium-grained	2	P_1	One	Long	3 - Exhausted	Perpendicular	flake, bladelet	Lombardo	3	3	Hard	528
2	P1	Integer	Integer	29	15	1.93333	8	Final	Core	0		Trapeze			flatparalelepiped	1	2-Bidirectional		Pisa	42	17	Radiolarite	77	27	18	71	2.8	4.2	Pebble	Polyhedron	angular	inner plan	fine/medium-grained	2	P_1	One	Long	3 - Exhausted	Perpendicular	flake, bladelet	Lombardo	3	3	Hard	528
18	P1	Integer	Integer	21	6	3.5	2	Initialization	Bladelet	Total	Total	Linear	Rectilinear	Feather	flat	0	Indet		Pisa	42	17	Radiolarite	77	27	18	71	2.8	4.2	Pebble	Polyhedron	angular	inner plan	fine/medium-grained	2	P_1	One	Long	3 - Exhausted	Perpendicular	flake, bladelet	Lombardo	3	3	Hard	528
9	P1	Integer	Integer	27	15	1.8	7	Initialization	Flake	51-75	Semi-total	Irregular	Rectilinear	Broken	Truncated pyramid/frustum	0	2-Bidirectional		Pisa	42	17	Radiolarite	77	27	18	71	2.8	4.2	Pebble	Polyhedron	angular	inner plan	fine/medium-grained	2	P_1	One	Long	3 - Exhausted	Perpendicular	flake, bladelet	Lombardo	3	3	Hard	528
12	P1	Integer	Integer	36	15	2.4	5	Production	Blade	1-25	Lateral back	Irregular	Rectilinear	Feather	flat	0	1-Unidirectional		Pisa	42	17	Radiolarite	77	27	18	71	2.8	4.2	Pebble	Polyhedron	angular	inner plan	fine/medium-grained	2	P_1	One	Long	3 - Exhausted	Perpendicular	flake, bladelet	Lombardo	3	3	Hard	528
7	P1	Integer	Integer	21	17	1.23529	7	Production	Flake	1-25	Lateral	Irregular	Convex	Hinged	triangular prism	0	1-Unidirectional		Pisa	42	17	Radiolarite	77	27	18	71	2.8	4.2	Pebble	Polyhedron	angular	inner plan	fine/medium-grained	2	P_1	One	Long	3 - Exhausted	Perpendicular	flake, bladelet	Lombardo	3	3	Hard	528
6	P1	Integer	Integer	29	23	1.26087	5	Production	Flake	26-50	Lateral	Trapeze	Rectilinear	Hinged	flat	0	2-Bidirectional		Pisa	42	17	Radiolarite	77	27	18	71	2.8	4.2	Pebble	Polyhedron	angular	inner plan	fine/medium-grained	2	P_1	One	Long	3 - Exhausted	Perpendicular	flake, bladelet	Lombardo	3	3	Hard	528
5	P1	Fragmented	Meso-Distal	24	10	2.4	3	Production	Bladelet	0		Triangular	Rectilinear	Hinged	flat		Indet		Pisa	42	17	Radiolarite	77	27	18	71	2.8	4.2	Pebble	Polyhedron	angular	inner plan	fine/medium-grained	2	P_1	One	Long	3 - Exhausted	Perpendicular	flake, bladelet	Lombardo	3	3	Hard	528
4	P1	Integer	Integer	71	17	4.17647	5	Initialization	Blade	76-99	Semi-total	Irregular	Wavy	Plunging	flat		1-Unidirectional		Pisa	42	17	Radiolarite	77	27	18	71	2.8	4.2	Pebble	Polyhedron	angular	inner plan	fine/medium-grained	2	P_1	One	Long	3 - Exhausted	Perpendicular	flake, bladelet	Lombardo	3	3	Hard	528
3	P1	Integer	Integer	76	18	4.22222	4	Initialization	Blade	Total	Total	Irregular	Rectilinear	Plunging	flat		Indet		Pisa	42	17	Radiolarite	77	27	18	71	2.8	4.2	Pebble	Polyhedron	angular	inner plan	fine/medium-grained	2	P_1	One	Long	3 - Exhausted	Perpendicular	flake, bladelet	Lombardo	3	3	Hard	528
21	P1	Fragmented	Meso-Distal	22	4	5.5	2	Production	Bladelet	0		Triangular	Rectilinear	Feather	flat	0	1-Unidirectional		Pisa	42	17	Radiolarite	77	27	18	71	2.8	4.2	Pebble	Polyhedron	angular	inner plan	fine/medium-grained	2	P_1	One	Long	3 - Exhausted	Perpendicular	flake, bladelet	Lombardo	3	3	Hard	528
11	P1	Fragmented	Proximal	14	26	0.538462	6	Production	Flake	26-50	Proximal	Triangular	Rectilinear	Broken	flat	0	1-Unidirectional		Pisa	42	17	Radiolarite	77	27	18	71	2.8	4.2	Pebble	Polyhedron	angular	inner plan	fine/medium-grained	2	P_1	One	Long	3 - Exhausted	Perpendicular	flake, bladelet	Lombardo	3	3	Hard	528
20	P1	Fragmented	Distal	13	6	2.16667	3	Production	Bladelet	1-25	Lateral	Trapeze	Rectilinear	Feather	flatparalelepiped	0	1-Unidirectional		Pisa	42	17	Radiolarite	77	27	18	71	2.8	4.2	Pebble	Polyhedron	angular	inner plan	fine/medium-grained	2	P_1	One	Long	3 - Exhausted	Perpendicular	flake, bladelet	Lombardo	3	3	Hard	528
10	P1	Integer	Integer	30	14	2.14286	9	Initialization	Backed flake	51-75	Lateral back	Irregular	Twisted	Plunging	flat	0	1-Unidirectional		Pisa	42	17	Radiolarite	77	27	18	71	2.8	4.2	Pebble	Polyhedron	angular	inner plan	fine/medium-grained	2	P_1	One	Long	3 - Exhausted	Perpendicular	flake, bladelet	Lombardo	3	3	Hard	528
19	P1	Fragmented	Distal	11	9	1.22222	2	Initialization	Flake	Total	Total	Linear	Rectilinear	Feather	flat	0	Indet		Pisa	42	17	Radiolarite	77	27	18	71	2.8	4.2	Pebble	Polyhedron	angular	inner plan	fine/medium-grained	2	P_1	One	Long	3 - Exhausted	Perpendicular	flake, bladelet	Lombardo	3	3	Hard	528
213	P10	Integer	Integer	10	14	0.714286	3	Initialization	Flake	Total	Total	Linear	Rectilinear	Feather	flat	0	Indet		Pisa	15	5	Radiolarite	49	33	20	39	1.4	1.2	Pebble	Polyhedron	angular	inner plan	fine/medium-grained	1	P_10	One	Long	3 - Exhausted	Perpendicular	flake, bladelet	Conforti	1	1	Hard	403
206	P10	Integer	Integer	24	27	0.888889	3	Initialization	Flake	26-50	Transversal	Linear	Wavy	Feather	flat	0	1-Unidirectional		Pisa	15	5	Radiolarite	49	33	20	39	1.4	1.2	Pebble	Polyhedron	angular	inner plan	fine/medium-grained	1	P_10	One	Long	3 - Exhausted	Perpendicular	flake, bladelet	Conforti	1	1	Hard	403
203	P10	Integer	Integer	30	28	1.07143	15	Final	Core	51-75	Mesial	Triangular			triangular prism	2	2-Bidirectional		Pisa	15	5	Radiolarite	49	33	20	39	1.4	1.2	Pebble	Polyhedron	angular	inner plan	fine/medium-grained	1	P_10	One	Long	3 - Exhausted	Perpendicular	flake, bladelet	Conforti	1	1	Hard	403
208	P10	Fragmented	Meso-Distal	17	24	0.708333	2	Initialization	Flake	Total	Total	Linear	Rectilinear	Feather	flat	0	Indet		Pisa	15	5	Radiolarite	49	33	20	39	1.4	1.2	Pebble	Polyhedron	angular	inner plan	fine/medium-grained	1	P_10	One	Long	3 - Exhausted	Perpendicular	flake, bladelet	Conforti	1	1	Hard	403
207	P10	Fragmented	Meso-Proximal	20	18	1.11111	5	Initialization	Flake	76-99	Semi-total	Linear	Rectilinear	Broken	flat	0	1-Unidirectional		Pisa	15	5	Radiolarite	49	33	20	39	1.4	1.2	Pebble	Polyhedron	angular	inner plan	fine/medium-grained	1	P_10	One	Long	3 - Exhausted	Perpendicular	flake, bladelet	Conforti	1	1	Hard	403
210	P10	Fragmented	Lateral	18	12	1.5	3	Initialization	Flake	76-99	Transversal	Linear	Rectilinear	Feather	flat	0	1-Unidirectional		Pisa	15	5	Radiolarite	49	33	20	39	1.4	1.2	Pebble	Polyhedron	angular	inner plan	fine/medium-grained	1	P_10	One	Long	3 - Exhausted	Perpendicular	flake, bladelet	Conforti	1	1	Hard	403
212	P10	Integer	Integer	8	17	0.470588	1	Production	Flake	0		Linear	Rectilinear	Hinged	flat	0	1-Unidirectional		Pisa	15	5	Radiolarite	49	33	20	39	1.4	1.2	Pebble	Polyhedron	angular	inner plan	fine/medium-grained	1	P_10	One	Long	3 - Exhausted	Perpendicular	flake, bladelet	Conforti	1	1	Hard	403
209	P10	Fragmented	Meso-Proximal	15	20	0.75	3	Initialization	Flake	76-99	Semi-total	Linear	Rectilinear	Broken	flat	0	Indet		Pisa	15	5	Radiolarite	49	33	20	39	1.4	1.2	Pebble	Polyhedron	angular	inner plan	fine/medium-grained	1	P_10	One	Long	3 - Exhausted	Perpendicular	flake, bladelet	Conforti	1	1	Hard	403
214	P10	Integer	Integer	9	14	0.642857	2	Production	Flake	0		Linear	Rectilinear	Hinged	flat	0	1-Unidirectional		Pisa	15	5	Radiolarite	49	33	20	39	1.4	1.2	Pebble	Polyhedron	angular	inner plan	fine/medium-grained	1	P_10	One	Long	3 - Exhausted	Perpendicular	flake, bladelet	Conforti	1	1	Hard	403
215	P10	Integer	Integer	13	6	2.16667	3	Initialization	Flake	26-50	Transversal	Triangular	Convex	Feather	flat	0	1-Unidirectional		Pisa	15	5	Radiolarite	49	33	20	39	1.4	1.2	Pebble	Polyhedron	angular	inner plan	fine/medium-grained	1	P_10	One	Long	3 - Exhausted	Perpendicular	flake, bladelet	Conforti	1	1	Hard	403
216	P10	Integer	Integer	15	9	1.66667	2	Initialization	Flake	76-99	Transversal	Linear	Rectilinear	Feather	flat	0	1-Unidirectional		Pisa	15	5	Radiolarite	49	33	20	39	1.4	1.2	Pebble	Polyhedron	angular	inner plan	fine/medium-grained	1	P_10	One	Long	3 - Exhausted	Perpendicular	flake, bladelet	Conforti	1	1	Hard	403
217	P10	Fragmented	Meso-Proximal	9	13	0.692308	1	Production	Flake	0		Linear	Rectilinear	Broken	flat	0	1-Unidirectional		Pisa	15	5	Radiolarite	49	33	20	39	1.4	1.2	Pebble	Polyhedron	angular	inner plan	fine/medium-grained	1	P_10	One	Long	3 - Exhausted	Perpendicular	flake, bladelet	Conforti	1	1	Hard	403
205	P10	Integer	Integer	22	17	1.29412	5	Initialization	Flake	Total	Total	Linear	Wavy	Feather	flat	0	Indet		Pisa	15	5	Radiolarite	49	33	20	39	1.4	1.2	Pebble	Polyhedron	angular	inner plan	fine/medium-grained	1	P_10	One	Long	3 - Exhausted	Perpendicular	flake, bladelet	Conforti	1	1	Hard	403
204	P10	Integer	Integer	42	19	2.21053	12	Initialization	Blade	51-75	Lateral back	Triangular	Twisted	Plunging	triangular prism	0	2-Bidirectional		Pisa	15	5	Radiolarite	49	33	20	39	1.4	1.2	Pebble	Polyhedron	angular	inner plan	fine/medium-grained	1	P_10	One	Long	3 - Exhausted	Perpendicular	flake, bladelet	Conforti	1	1	Hard	403
211	P10	Integer	Integer	8	16	0.5	2	Initialization	Flake	51-75	Lateral	Linear	Wavy	Hinged	flat	0	1-Unidirectional		Pisa	15	5	Radiolarite	49	33	20	39	1.4	1.2	Pebble	Polyhedron	angular	inner plan	fine/medium-grained	1	P_10	One	Long	3 - Exhausted	Perpendicular	flake, bladelet	Conforti	1	1	Hard	403
228	P11	Fragmented	Meso-Proximal	13	13	1	5	Initialization	Flake	26-50	Lateral	Linear	Rectilinear	Broken	flat	0	2-Bidirectional		Pisa	22	37	Radiolarite	44	29	14	28	1.5	3.1	Pebble	Polyhedron	sub-angular	inner plan	medium-grained	0	P_11	One	Long	3 - Exhausted	Perpendicular	flake, bladelet	Lombardo	11	4	Hard	320
225	P11	Integer	Integer	21	24	0.875	4	Final	Backed flake	1-25	Lateral back	Linear	Rectilinear	Plunging	flat	0	2-Bidirectional		Pisa	22	37	Radiolarite	44	29	14	28	1.5	3.1	Pebble	Polyhedron	sub-angular	inner plan	medium-grained	0	P_11	One	Long	3 - Exhausted	Perpendicular	flake, bladelet	Lombardo	11	4	Hard	320
224	P11	Integer	Integer	22	20	1.1	4	Final	Flake	51-75	Proximal	Linear	Rectilinear	Plunging	flat	0	2-Bidirectional		Pisa	22	37	Radiolarite	44	29	14	28	1.5	3.1	Pebble	Polyhedron	sub-angular	inner plan	medium-grained	0	P_11	One	Long	3 - Exhausted	Perpendicular	flake, bladelet	Lombardo	11	4	Hard	320
226	P11	Fragmented	Meso-Proximal	17	8	2.125	5	Initialization	Bladelet	51-75	Lateral	Triangular	Twisted	Broken	triangular prism	0	2-Bidirectional		Pisa	22	37	Radiolarite	44	29	14	28	1.5	3.1	Pebble	Polyhedron	sub-angular	inner plan	medium-grained	0	P_11	One	Long	3 - Exhausted	Perpendicular	flake, bladelet	Lombardo	11	4	Hard	320
227	P11	Fragmented	Meso-Distal	14	6	2.33333	2	Initialization	Bladelet	51-75	Lateral	Triangular	Rectilinear	Feather	triangular prism	0	2-Bidirectional		Pisa	22	37	Radiolarite	44	29	14	28	1.5	3.1	Pebble	Polyhedron	sub-angular	inner plan	medium-grained	0	P_11	One	Long	3 - Exhausted	Perpendicular	flake, bladelet	Lombardo	11	4	Hard	320
229	P11	Integer	Integer	31	12	2.58333	6	Final	Bladelet	Total	Total	Irregular	Wavy	Plunging	flat	0	2-Bidirectional		Pisa	22	37	Radiolarite	44	29	14	28	1.5	3.1	Pebble	Polyhedron	sub-angular	inner plan	medium-grained	0	P_11	One	Long	3 - Exhausted	Perpendicular	flake, bladelet	Lombardo	11	4	Hard	320
230	P11	Fragmented	Meso-Proximal	23	10	2.3	5	Final	Bladelet	1-25	Lateral	Trapeze	Rectilinear	Broken	flatparalelepiped	0	2-Bidirectional		Pisa	22	37	Radiolarite	44	29	14	28	1.5	3.1	Pebble	Polyhedron	sub-angular	inner plan	medium-grained	0	P_11	One	Long	3 - Exhausted	Perpendicular	flake, bladelet	Lombardo	11	4	Hard	320
231	P11	Integer	Integer	34	9	3.77778	6	Final	Bladelet	51-75	Lateral	Trapeze	Rectilinear	Plunging	Truncated pyramid/frustum	0	2-Bidirectional		Pisa	22	37	Radiolarite	44	29	14	28	1.5	3.1	Pebble	Polyhedron	sub-angular	inner plan	medium-grained	0	P_11	One	Long	3 - Exhausted	Perpendicular	flake, bladelet	Lombardo	11	4	Hard	320
232	P11	Integer	Integer	12	6	2	3	Production	Flake	0		Irregular	Wavy	Broken	flat	0	2-Bidirectional		Pisa	22	37	Radiolarite	44	29	14	28	1.5	3.1	Pebble	Polyhedron	sub-angular	inner plan	medium-grained	0	P_11	One	Long	3 - Exhausted	Perpendicular	flake, bladelet	Lombardo	11	4	Hard	320
234	p11	Integer	Integer	15	14	1.07143	2	Production	Flake	0		Linear	Rectilinear	Feather	flat	0	1-Unidirectional		Pisa	22	37	Radiolarite	44	29	14	28	1.5	3.1	Pebble	Polyhedron	sub-angular	inner plan	medium-grained	0	P_11	One	Long	3 - Exhausted	Perpendicular	flake, bladelet	Lombardo	11	4	Hard	320
223	P11	Fragmented	Mesial	17	2	8.5	2	Initialization	Bladelet	51-75	Lateral back	Triangular	Rectilinear	Broken	flat	0	1-Unidirectional		Pisa	22	37	Radiolarite	44	29	14	28	1.5	3.1	Pebble	Polyhedron	sub-angular	inner plan	medium-grained	0	P_11	One	Long	3 - Exhausted	Perpendicular	flake, bladelet	Lombardo	11	4	Hard	320
235	P11	Fragmented	Meso-Distal	20	11	1.81818	2	Production	Backed flake	26-50	Lateral back	Linear	Twisted	Plunging	flat	0	2-Bidirectional		Pisa	22	37	Radiolarite	44	29	14	28	1.5	3.1	Pebble	Polyhedron	sub-angular	inner plan	medium-grained	0	P_11	One	Long	3 - Exhausted	Perpendicular	flake, bladelet	Lombardo	11	4	Hard	320
233	P11	Integer	Integer	19	13	1.46154	2	Initialization	Flake	76-99	Semi-total	Linear	Rectilinear	Hinged	flat	0	2-Bidirectional		Pisa	22	37	Radiolarite	44	29	14	28	1.5	3.1	Pebble	Polyhedron	sub-angular	inner plan	medium-grained	0	P_11	One	Long	3 - Exhausted	Perpendicular	flake, bladelet	Lombardo	11	4	Hard	320
222	P11	Integer	Integer	16	5	3.2	2	Initialization	Bladelet	76-99	Semi-total	Triangular	Rectilinear	Feather	flat	0	Indet	Anvil	Pisa	22	37	Radiolarite	44	29	14	28	1.5	3.1	Pebble	Polyhedron	sub-angular	inner plan	medium-grained	0	P_11	One	Long	3 - Exhausted	Perpendicular	flake, bladelet	Lombardo	11	4	Hard	320
239	P11	Integer	Integer	7	12	0.583333	2	Initialization	Flake	51-75	Proximal	Triangular	Rectilinear	Feather	flat	0	3-Orthogonal		Pisa	22	37	Radiolarite	44	29	14	28	1.5	3.1	Pebble	Polyhedron	sub-angular	inner plan	medium-grained	0	P_11	One	Long	3 - Exhausted	Perpendicular	flake, bladelet	Lombardo	11	4	Hard	320
237	P11	Integer	Integer	12	13	0.923077	3	Production	Flake	1-25	Lateral back	Triangular	Rectilinear	Plunging	flat	0	3-Orthogonal		Pisa	22	37	Radiolarite	44	29	14	28	1.5	3.1	Pebble	Polyhedron	sub-angular	inner plan	medium-grained	0	P_11	One	Long	3 - Exhausted	Perpendicular	flake, bladelet	Lombardo	11	4	Hard	320
236	P11	Integer	Integer	13	10	1.3	2	Production	Flake	0		Linear	Rectilinear	Feather	flat	0	2-Bidirectional		Pisa	22	37	Radiolarite	44	29	14	28	1.5	3.1	Pebble	Polyhedron	sub-angular	inner plan	medium-grained	0	P_11	One	Long	3 - Exhausted	Perpendicular	flake, bladelet	Lombardo	11	4	Hard	320
221	P11	Integer	Integer	24	16	1.5	3	Initialization	Flake	76-99	Semi-total	Linear	Rectilinear	Feather	flat	0	2-Bidirectional		Pisa	22	37	Radiolarite	44	29	14	28	1.5	3.1	Pebble	Polyhedron	sub-angular	inner plan	medium-grained	0	P_11	One	Long	3 - Exhausted	Perpendicular	flake, bladelet	Lombardo	11	4	Hard	320
220	P11	Integer	Integer	24	12	2	4	Initialization	Flake	76-99	Semi-total	Linear	Rectilinear	Hinged	flat	0	1-Unidirectional		Pisa	22	37	Radiolarite	44	29	14	28	1.5	3.1	Pebble	Polyhedron	sub-angular	inner plan	medium-grained	0	P_11	One	Long	3 - Exhausted	Perpendicular	flake, bladelet	Lombardo	11	4	Hard	320
219	P11	Integer	Integer	23	22	1.04545	6	Production	Flake	1-25	Lateral	Triangular	Rectilinear	Feather	flat	0	2-Bidirectional		Pisa	22	37	Radiolarite	44	29	14	28	1.5	3.1	Pebble	Polyhedron	sub-angular	inner plan	medium-grained	0	P_11	One	Long	3 - Exhausted	Perpendicular	flake, bladelet	Lombardo	11	4	Hard	320
218	P11	Integer	Integer	30	17	1.76471	6	Initialization	Flake	26-50	Lateral	Trapeze	Rectilinear	Plunging	flat	0	2-Bidirectional		Pisa	22	37	Radiolarite	44	29	14	28	1.5	3.1	Pebble	Polyhedron	sub-angular	inner plan	medium-grained	0	P_11	One	Long	3 - Exhausted	Perpendicular	flake, bladelet	Lombardo	11	4	Hard	320
238	P11	Integer	Integer	11	6	1.83333	1	Production	Flake	26-50	Transversal	Linear	Rectilinear	Feather	flat	0	1-Unidirectional		Pisa	22	37	Radiolarite	44	29	14	28	1.5	3.1	Pebble	Polyhedron	sub-angular	inner plan	medium-grained	0	P_11	One	Long	3 - Exhausted	Perpendicular	flake, bladelet	Lombardo	11	4	Hard	320
245	P12	Integer	Integer	26	26	1	2	Production	Backed flake	1-25	Lateral back	Linear	Rectilinear	Feather	flat	0	2-Bidirectional		Pisa	23	69 (26)	Radiolarite	43	35	36	38	1.2	1.1	Chunk	Polyhedron	angular	inner plan	fine/medium-grained	1	P_12	Two	Long + Short	2 - Medium	Perpendicular	flake, bladelet	Lombardo	21	4	Soft	367
241	P12	Integer	Integer	37	30	1.23333	8	Final	Flake	76-99	Semi-total	Trapeze	Rectilinear	Plunging	flat	0	2-Bidirectional		Pisa	23	69 (26)	Radiolarite	43	35	36	38	1.2	1.1	Chunk	Polyhedron	angular	inner plan	fine/medium-grained	1	P_12	Two	Long + Short	2 - Medium	Perpendicular	flake, bladelet	Lombardo	21	4	Soft	367
244	P12	Integer	Integer	18	4	4.5	2	Production	Bladelet	0		Triangular	Twisted	Broken	flat	0	2-Bidirectional		Pisa	23	69 (26)	Radiolarite	43	35	36	38	1.2	1.1	Chunk	Polyhedron	angular	inner plan	fine/medium-grained	1	P_12	Two	Long + Short	2 - Medium	Perpendicular	flake, bladelet	Lombardo	21	4	Soft	367
240	P12	Integer	Integer	26	12	2.16667	6	Final	Bladelet	26-50	Lateral back	Trapeze	Rectilinear	Plunging	flat	0	4-Multidirectional		Pisa	23	69 (26)	Radiolarite	43	35	36	38	1.2	1.1	Chunk	Polyhedron	angular	inner plan	fine/medium-grained	1	P_12	Two	Long + Short	2 - Medium	Perpendicular	flake, bladelet	Lombardo	21	4	Soft	367
262	P12	Integer	Integer	12	3	4	1	Production	Bladelet	0		Triangular	Rectilinear	Feather	flat	0	3-Orthogonal		Pisa	23	69 (26)	Radiolarite	43	35	36	38	1.2	1.1	Chunk	Polyhedron	angular	inner plan	fine/medium-grained	1	P_12	Two	Long + Short	2 - Medium	Perpendicular	flake, bladelet	Lombardo	21	4	Soft	367
261	P12	Fragmented	Lateral	12	2	6	2	Initialization	Bladelet	26-50	Lateral	Triangular	Twisted	Feather	triangular prism	0	4-Multidirectional		Pisa	23	69 (26)	Radiolarite	43	35	36	38	1.2	1.1	Chunk	Polyhedron	angular	inner plan	fine/medium-grained	1	P_12	Two	Long + Short	2 - Medium	Perpendicular	flake, bladelet	Lombardo	21	4	Soft	367
242	P12	Integer	Integer	25	20	1.25	8	Final	Core	26-50	Lateral back	Trapeze	Rectilinear		flatparalelepiped	3	2-Bidirectional		Pisa	23	69 (26)	Radiolarite	43	35	36	38	1.2	1.1	Chunk	Polyhedron	angular	inner plan	fine/medium-grained	1	P_12	Two	Long + Short	2 - Medium	Perpendicular	flake, bladelet	Lombardo	21	4	Soft	367
252	P12	Fragmented	Meso-Distal	19	12	1.58333	3	Initialization	Flake	Total	Total	Half circles	Rectilinear	Feather	flat	0	Indet		Pisa	23	69 (26)	Radiolarite	43	35	36	38	1.2	1.1	Chunk	Polyhedron	angular	inner plan	fine/medium-grained	1	P_12	Two	Long + Short	2 - Medium	Perpendicular	flake, bladelet	Lombardo	21	4	Soft	367
259	P12	Fragmented	Meso-Proximal	12	9	1.33333	3	Initialization	Flake	76-99	Semi-total	Linear	Rectilinear	Broken	flat	0	1-Unidirectional		Pisa	23	69 (26)	Radiolarite	43	35	36	38	1.2	1.1	Chunk	Polyhedron	angular	inner plan	fine/medium-grained	1	P_12	Two	Long + Short	2 - Medium	Perpendicular	flake, bladelet	Lombardo	21	4	Soft	367
258	P12	Fragmented	Proximal	8	10	0.8	2	Production	Flake	0		Trapeze	Rectilinear	Broken	flat	0	1-Unidirectional		Pisa	23	69 (26)	Radiolarite	43	35	36	38	1.2	1.1	Chunk	Polyhedron	angular	inner plan	fine/medium-grained	1	P_12	Two	Long + Short	2 - Medium	Perpendicular	flake, bladelet	Lombardo	21	4	Soft	367
257	P12	Integer	Integer	11	5	2.2	2	Initialization	Bladelet	Total	Total	Linear	Twisted	Broken	flat	0	Indet		Pisa	23	69 (26)	Radiolarite	43	35	36	38	1.2	1.1	Chunk	Polyhedron	angular	inner plan	fine/medium-grained	1	P_12	Two	Long + Short	2 - Medium	Perpendicular	flake, bladelet	Lombardo	21	4	Soft	367
256	P12	Fragmented	Meso-Distal	11	7	1.57143	1	Production	Flake	0		Linear	Rectilinear	Feather	flat	0	1-Unidirectional		Pisa	23	69 (26)	Radiolarite	43	35	36	38	1.2	1.1	Chunk	Polyhedron	angular	inner plan	fine/medium-grained	1	P_12	Two	Long + Short	2 - Medium	Perpendicular	flake, bladelet	Lombardo	21	4	Soft	367
255	P12	Integer	Integer	11	5	2.2	3	Production	Bladelet	0		Trapeze	Rectilinear	Broken	flat	0	1-Unidirectional		Pisa	23	69 (26)	Radiolarite	43	35	36	38	1.2	1.1	Chunk	Polyhedron	angular	inner plan	fine/medium-grained	1	P_12	Two	Long + Short	2 - Medium	Perpendicular	flake, bladelet	Lombardo	21	4	Soft	367
254	P12	Fragmented	Mesial	13	12	1.08333	3	Production	Flake	0		Trapeze	Rectilinear	Broken	Truncated pyramid/frustum	0	1-Unidirectional		Pisa	23	69 (26)	Radiolarite	43	35	36	38	1.2	1.1	Chunk	Polyhedron	angular	inner plan	fine/medium-grained	1	P_12	Two	Long + Short	2 - Medium	Perpendicular	flake, bladelet	Lombardo	21	4	Soft	367
243	P12	Integer	Integer	24	6	4	4	Production	Bladelet	51-75	Lateral back	Trapeze	Rectilinear	Broken	flat	0	2-Bidirectional		Pisa	23	69 (26)	Radiolarite	43	35	36	38	1.2	1.1	Chunk	Polyhedron	angular	inner plan	fine/medium-grained	1	P_12	Two	Long + Short	2 - Medium	Perpendicular	flake, bladelet	Lombardo	21	4	Soft	367
253	P12	Integer	Integer	17	12	1.41667	2	Production	Flake	0		Linear	Rectilinear	Broken	flat	0	1-Unidirectional		Pisa	23	69 (26)	Radiolarite	43	35	36	38	1.2	1.1	Chunk	Polyhedron	angular	inner plan	fine/medium-grained	1	P_12	Two	Long + Short	2 - Medium	Perpendicular	flake, bladelet	Lombardo	21	4	Soft	367
260	P12	Fragmented	Mesial	16	9	1.77778	2	Production	Backed flake	1-25	Lateral back	Triangular	Rectilinear	Broken	flat	0	1-Unidirectional		Pisa	23	69 (26)	Radiolarite	43	35	36	38	1.2	1.1	Chunk	Polyhedron	angular	inner plan	fine/medium-grained	1	P_12	Two	Long + Short	2 - Medium	Perpendicular	flake, bladelet	Lombardo	21	4	Soft	367
251	P12	Integer	Integer	17	17	1	2	Production	Backed flake	1-25	Lateral back	Linear	Rectilinear	Feather	flat	0	1-Unidirectional		Pisa	23	69 (26)	Radiolarite	43	35	36	38	1.2	1.1	Chunk	Polyhedron	angular	inner plan	fine/medium-grained	1	P_12	Two	Long + Short	2 - Medium	Perpendicular	flake, bladelet	Lombardo	21	4	Soft	367
250	P12	Integer	Integer	14	19	0.736842	4	Production	Flake	1-25	Proximal	Linear	Wavy	Broken	flat	0	1-Unidirectional		Pisa	23	69 (26)	Radiolarite	43	35	36	38	1.2	1.1	Chunk	Polyhedron	angular	inner plan	fine/medium-grained	1	P_12	Two	Long + Short	2 - Medium	Perpendicular	flake, bladelet	Lombardo	21	4	Soft	367
249	P12	Integer	Integer	17	21	0.809524	1	Production	Flake	0		Linear	Rectilinear	Hinged	flat	0	1-Unidirectional		Pisa	23	69 (26)	Radiolarite	43	35	36	38	1.2	1.1	Chunk	Polyhedron	angular	inner plan	fine/medium-grained	1	P_12	Two	Long + Short	2 - Medium	Perpendicular	flake, bladelet	Lombardo	21	4	Soft	367
248	P12	Integer	Integer	21	23	0.913043	2	Production	Backed flake	1-25	Lateral back	Linear	Rectilinear	Hinged	flat	0	1-Unidirectional		Pisa	23	69 (26)	Radiolarite	43	35	36	38	1.2	1.1	Chunk	Polyhedron	angular	inner plan	fine/medium-grained	1	P_12	Two	Long + Short	2 - Medium	Perpendicular	flake, bladelet	Lombardo	21	4	Soft	367
247	P12	Fragmented	Meso-Distal	14	20	0.7	5	Production	Backed flake	1-25	Lateral back	Irregular	Concave	Plunging	poligonal	0	2-Bidirectional		Pisa	23	69 (26)	Radiolarite	43	35	36	38	1.2	1.1	Chunk	Polyhedron	angular	inner plan	fine/medium-grained	1	P_12	Two	Long + Short	2 - Medium	Perpendicular	flake, bladelet	Lombardo	21	4	Soft	367
246	P12	Fragmented	Meso-Proximal	15	21	0.714286	3	Production	Backed flake	26-50	Lateral back	Triangular	Convex	Broken	flat	0	1-Unidirectional		Pisa	23	69 (26)	Radiolarite	43	35	36	38	1.2	1.1	Chunk	Polyhedron	angular	inner plan	fine/medium-grained	1	P_12	Two	Long + Short	2 - Medium	Perpendicular	flake, bladelet	Lombardo	21	4	Soft	367
271	P13	Fragmented	Composite	14	12	1.16667	5	Production	Chunk	0		Irregular	Rectilinear		Truncated pyramid/frustum	0	Indet		Pisa	40	73	Radiolarite	52	42	25	74	1.2	2.1	Pebble	Polyhedron	sub-angular	inner plan	medium-grained	1	P_13	Two	Long + Short	3 - Exhausted	Perpendicular	flake, bladelet	Lombardo	22	5	Hard	797
274	P13	Integer	Integer	14	8	1.75	4	Production	Flake	0		Triangular	Rectilinear	Broken	flat	0	1-Unidirectional		Pisa	40	73	Radiolarite	52	42	25	74	1.2	2.1	Pebble	Polyhedron	sub-angular	inner plan	medium-grained	1	P_13	Two	Long + Short	3 - Exhausted	Perpendicular	flake, bladelet	Lombardo	22	5	Hard	797
272	P13	Integer	Integer	10	8	1.25	2	Production	Flake	0		Linear	Rectilinear	Feather	flat	0	1-Unidirectional		Pisa	40	73	Radiolarite	52	42	25	74	1.2	2.1	Pebble	Polyhedron	sub-angular	inner plan	medium-grained	1	P_13	Two	Long + Short	3 - Exhausted	Perpendicular	flake, bladelet	Lombardo	22	5	Hard	797
270	P13	Integer	Integer	10	15	0.666667	4	Production	Flake	0		Linear	Wavy	Hinged	flat	0	1-Unidirectional		Pisa	40	73	Radiolarite	52	42	25	74	1.2	2.1	Pebble	Polyhedron	sub-angular	inner plan	medium-grained	1	P_13	Two	Long + Short	3 - Exhausted	Perpendicular	flake, bladelet	Lombardo	22	5	Hard	797
297	P13	Integer	Integer	22	11	2	3	Production	Flake	0		Linear	Twisted	Broken	flat	0	1-Unidirectional		Pisa	40	73	Radiolarite	52	42	25	74	1.2	2.1	Pebble	Polyhedron	sub-angular	inner plan	medium-grained	1	P_13	Two	Long + Short	3 - Exhausted	Perpendicular	flake, bladelet	Lombardo	22	5	Hard	797
273	P13	Integer	Integer	10	14	0.714286	2	Production	Flake	0		Linear	Rectilinear	Feather	flat	0	1-Unidirectional		Pisa	40	73	Radiolarite	52	42	25	74	1.2	2.1	Pebble	Polyhedron	sub-angular	inner plan	medium-grained	1	P_13	Two	Long + Short	3 - Exhausted	Perpendicular	flake, bladelet	Lombardo	22	5	Hard	797
287	P13	Integer	Integer	22	16	1.375	14	Final	Core	51-75	Lateral	Trapeze			Truncated pyramid/frustum	3	3-Orthogonal		Pisa	40	73	Radiolarite	52	42	25	74	1.2	2.1	Pebble	Polyhedron	sub-angular	inner plan	medium-grained	1	P_13	Two	Long + Short	3 - Exhausted	Perpendicular	flake, bladelet	Lombardo	22	5	Hard	797
301	P13	Fragmented	Mesial	4	13	0.307692	1	Production	Flake	0		Linear	Rectilinear	Broken	flat	0	1-Unidirectional		Pisa	40	73	Radiolarite	52	42	25	74	1.2	2.1	Pebble	Polyhedron	sub-angular	inner plan	medium-grained	1	P_13	Two	Long + Short	3 - Exhausted	Perpendicular	flake, bladelet	Lombardo	22	5	Hard	797
299	P13	Fragmented	Composite	32	13	2.46154	8	Production	Chunk	26-50	Lateral	Triangular	Rectilinear		triangular prism	0	Indet		Pisa	40	73	Radiolarite	52	42	25	74	1.2	2.1	Pebble	Polyhedron	sub-angular	inner plan	medium-grained	1	P_13	Two	Long + Short	3 - Exhausted	Perpendicular	flake, bladelet	Lombardo	22	5	Hard	797
298	P13	Integer	Integer	11	3	3.66667	3	Production	Bladelet	0		Triangular	Rectilinear	Feather	flat	0	2-Bidirectional		Pisa	40	73	Radiolarite	52	42	25	74	1.2	2.1	Pebble	Polyhedron	sub-angular	inner plan	medium-grained	1	P_13	Two	Long + Short	3 - Exhausted	Perpendicular	flake, bladelet	Lombardo	22	5	Hard	797
300	P13	Integer	Integer	17	4	4.25	3	Production	Bladelet	0		Triangular	Rectilinear	Feather	triangular prism	0	1-Unidirectional		Pisa	40	73	Radiolarite	52	42	25	74	1.2	2.1	Pebble	Polyhedron	sub-angular	inner plan	medium-grained	1	P_13	Two	Long + Short	3 - Exhausted	Perpendicular	flake, bladelet	Lombardo	22	5	Hard	797
296	P13	Integer	Integer	14	21	0.666667	8	Initialization	Flake	76-99	Semi-total	Trapeze	Rectilinear	Plunging	flat	0	2-Bidirectional		Pisa	40	73	Radiolarite	52	42	25	74	1.2	2.1	Pebble	Polyhedron	sub-angular	inner plan	medium-grained	1	P_13	Two	Long + Short	3 - Exhausted	Perpendicular	flake, bladelet	Lombardo	22	5	Hard	797
269	P13	Fragmented	Proximal	11	13	0.846154	5	Production	Flake	0		Irregular	Wavy	Broken	triangular prism	0	2-Bidirectional		Pisa	40	73	Radiolarite	52	42	25	74	1.2	2.1	Pebble	Polyhedron	sub-angular	inner plan	medium-grained	1	P_13	Two	Long + Short	3 - Exhausted	Perpendicular	flake, bladelet	Lombardo	22	5	Hard	797
294	P13	Integer	Integer	20	13	1.53846	2	Initialization	Flake	Total	Total	Linear	Rectilinear	Broken	flat	0	Indet		Pisa	40	73	Radiolarite	52	42	25	74	1.2	2.1	Pebble	Polyhedron	sub-angular	inner plan	medium-grained	1	P_13	Two	Long + Short	3 - Exhausted	Perpendicular	flake, bladelet	Lombardo	22	5	Hard	797
293	P13	Integer	Integer	22	10	2.2	9	Production	Bladelet	26-50	Transversal	Triangular	Twisted	Plunging	triangular prism	0	3-Orthogonal		Pisa	40	73	Radiolarite	52	42	25	74	1.2	2.1	Pebble	Polyhedron	sub-angular	inner plan	medium-grained	1	P_13	Two	Long + Short	3 - Exhausted	Perpendicular	flake, bladelet	Lombardo	22	5	Hard	797
292	P13	Integer	Integer	26	19	1.36842	8	Production	Flake	0		Triangular	Rectilinear	Broken	triangular prism	0	2-Bidirectional		Pisa	40	73	Radiolarite	52	42	25	74	1.2	2.1	Pebble	Polyhedron	sub-angular	inner plan	medium-grained	1	P_13	Two	Long + Short	3 - Exhausted	Perpendicular	flake, bladelet	Lombardo	22	5	Hard	797
291	P13	Integer	Integer	27	14	1.92857	9	Initialization	Flake	51-75	Transversal	Trapeze	Convex	Plunging	Truncated pyramid/frustum	0	2-Bidirectional		Pisa	40	73	Radiolarite	52	42	25	74	1.2	2.1	Pebble	Polyhedron	sub-angular	inner plan	medium-grained	1	P_13	Two	Long + Short	3 - Exhausted	Perpendicular	flake, bladelet	Lombardo	22	5	Hard	797
290	P13	Integer	Integer	21	18	1.16667	7	Production	Flake	26-50	Lateral	Irregular	Wavy	Broken	Truncated pyramid/frustum	0	2-Bidirectional		Pisa	40	73	Radiolarite	52	42	25	74	1.2	2.1	Pebble	Polyhedron	sub-angular	inner plan	medium-grained	1	P_13	Two	Long + Short	3 - Exhausted	Perpendicular	flake, bladelet	Lombardo	22	5	Hard	797
295	P13	Fragmented	Composite	19	12	1.58333	5	Production	Chunk	26-50	Lateral	Trapeze	Rectilinear		Truncated pyramid/frustum	0	4-Multidirectional		Pisa	40	73	Radiolarite	52	42	25	74	1.2	2.1	Pebble	Polyhedron	sub-angular	inner plan	medium-grained	1	P_13	Two	Long + Short	3 - Exhausted	Perpendicular	flake, bladelet	Lombardo	22	5	Hard	797
288	P13	Integer	Integer	42	21	2	5	Initialization	Flake	Total	Total	Half circles	Rectilinear	Broken	flat	0	Indet		Pisa	40	73	Radiolarite	52	42	25	74	1.2	2.1	Pebble	Polyhedron	sub-angular	inner plan	medium-grained	1	P_13	Two	Long + Short	3 - Exhausted	Perpendicular	flake, bladelet	Lombardo	22	5	Hard	797
275	P13	Integer	Integer	14	8	1.75	4	Production	Flake	0		Trapeze	Rectilinear	Hinged	Truncated pyramid/frustum	0	1-Unidirectional		Pisa	40	73	Radiolarite	52	42	25	74	1.2	2.1	Pebble	Polyhedron	sub-angular	inner plan	medium-grained	1	P_13	Two	Long + Short	3 - Exhausted	Perpendicular	flake, bladelet	Lombardo	22	5	Hard	797
286	P13	Integer	Integer	30	20	1.5	8	Production	Flake	76-99	Semi-total	Trapeze	Rectilinear	Plunging	flatparalelepiped	0	4-Multidirectional		Pisa	40	73	Radiolarite	52	42	25	74	1.2	2.1	Pebble	Polyhedron	sub-angular	inner plan	medium-grained	1	P_13	Two	Long + Short	3 - Exhausted	Perpendicular	flake, bladelet	Lombardo	22	5	Hard	797
285	P13	Integer	Integer	33	25	1.32	7	Production	Flake	76-99	Semi-total	Trapeze	Rectilinear	Plunging	flatparalelepiped	0	4-Multidirectional		Pisa	40	73	Radiolarite	52	42	25	74	1.2	2.1	Pebble	Polyhedron	sub-angular	inner plan	medium-grained	1	P_13	Two	Long + Short	3 - Exhausted	Perpendicular	flake, bladelet	Lombardo	22	5	Hard	797
284	P13	Integer	Integer	7	14	0.5	1	Production	Flake	0		Linear	Rectilinear	Feather	flat	0	1-Unidirectional		Pisa	40	73	Radiolarite	52	42	25	74	1.2	2.1	Pebble	Polyhedron	sub-angular	inner plan	medium-grained	1	P_13	Two	Long + Short	3 - Exhausted	Perpendicular	flake, bladelet	Lombardo	22	5	Hard	797
283	P13	Integer	Integer	13	7	1.85714	2	Production	Flake	0		Linear	Rectilinear	Hinged	flat	0	1-Unidirectional		Pisa	40	73	Radiolarite	52	42	25	74	1.2	2.1	Pebble	Polyhedron	sub-angular	inner plan	medium-grained	1	P_13	Two	Long + Short	3 - Exhausted	Perpendicular	flake, bladelet	Lombardo	22	5	Hard	797
282	P13	Fragmented	Lateral	13	6	2.16667	2	Production	Flake	0		Triangular	Rectilinear	Feather	flat	0	2-Bidirectional		Pisa	40	73	Radiolarite	52	42	25	74	1.2	2.1	Pebble	Polyhedron	sub-angular	inner plan	medium-grained	1	P_13	Two	Long + Short	3 - Exhausted	Perpendicular	flake, bladelet	Lombardo	22	5	Hard	797
281	P13	Fragmented	Meso-Proximal	10	5	2	2	Production	Flake	0		Linear	Rectilinear	Broken	flat	0	1-Unidirectional		Pisa	40	73	Radiolarite	52	42	25	74	1.2	2.1	Pebble	Polyhedron	sub-angular	inner plan	medium-grained	1	P_13	Two	Long + Short	3 - Exhausted	Perpendicular	flake, bladelet	Lombardo	22	5	Hard	797
280	P13	Integer	Integer	13	5	2.6	2	Production	Bladelet	0		Linear	Rectilinear	Feather	flat	0	1-Unidirectional		Pisa	40	73	Radiolarite	52	42	25	74	1.2	2.1	Pebble	Polyhedron	sub-angular	inner plan	medium-grained	1	P_13	Two	Long + Short	3 - Exhausted	Perpendicular	flake, bladelet	Lombardo	22	5	Hard	797
279	P13	Integer	Integer	13	8	1.625	4	Initialization	Flake	26-50	Transversal	Trapeze	Rectilinear	Plunging	Truncated pyramid/frustum	0	2-Bidirectional		Pisa	40	73	Radiolarite	52	42	25	74	1.2	2.1	Pebble	Polyhedron	sub-angular	inner plan	medium-grained	1	P_13	Two	Long + Short	3 - Exhausted	Perpendicular	flake, bladelet	Lombardo	22	5	Hard	797
278	P13	Integer	Integer	10	12	0.833333	2	Production	Flake	0		Linear	Rectilinear	Feather	flat	0	1-Unidirectional		Pisa	40	73	Radiolarite	52	42	25	74	1.2	2.1	Pebble	Polyhedron	sub-angular	inner plan	medium-grained	1	P_13	Two	Long + Short	3 - Exhausted	Perpendicular	flake, bladelet	Lombardo	22	5	Hard	797
277	P13	Integer	Integer	9	11	0.818182	1	Production	Flake	0		Linear	Rectilinear	Feather	flat	0	1-Unidirectional		Pisa	40	73	Radiolarite	52	42	25	74	1.2	2.1	Pebble	Polyhedron	sub-angular	inner plan	medium-grained	1	P_13	Two	Long + Short	3 - Exhausted	Perpendicular	flake, bladelet	Lombardo	22	5	Hard	797
276	P13	Integer	Integer	12	6	2	3	Production	Flake	0		Trapeze	Rectilinear	Broken	flat	0	2-Bidirectional		Pisa	40	73	Radiolarite	52	42	25	74	1.2	2.1	Pebble	Polyhedron	sub-angular	inner plan	medium-grained	1	P_13	Two	Long + Short	3 - Exhausted	Perpendicular	flake, bladelet	Lombardo	22	5	Hard	797
289	P13	Integer	Integer	20	18	1.11111	12	Production	Flake	26-50	Lateral	Irregular	Wavy	Hinged	triangular prism	0	1-Unidirectional		Pisa	40	73	Radiolarite	52	42	25	74	1.2	2.1	Pebble	Polyhedron	sub-angular	inner plan	medium-grained	1	P_13	Two	Long + Short	3 - Exhausted	Perpendicular	flake, bladelet	Lombardo	22	5	Hard	797
267	P13	Integer	Integer	19	13	1.46154	5	Production	Backed flake	26-50	Lateral back	Linear	Wavy	Feather	flat	0	1-Unidirectional		Pisa	40	73	Radiolarite	52	42	25	74	1.2	2.1	Pebble	Polyhedron	sub-angular	inner plan	medium-grained	1	P_13	Two	Long + Short	3 - Exhausted	Perpendicular	flake, bladelet	Lombardo	22	5	Hard	797
266	P13	Integer	Integer	17	11	1.54545	6	Production	Flake	0	Lateral	Trapeze	Convex	Broken	flat	0	1-Unidirectional		Pisa	40	73	Radiolarite	52	42	25	74	1.2	2.1	Pebble	Polyhedron	sub-angular	inner plan	medium-grained	1	P_13	Two	Long + Short	3 - Exhausted	Perpendicular	flake, bladelet	Lombardo	22	5	Hard	797
265	P13	Fragmented	Proximal	14	8	1.75	4	Initialization	Flake	Total	Total	Half circles	Rectilinear	Broken	flat	0	Indet		Pisa	40	73	Radiolarite	52	42	25	74	1.2	2.1	Pebble	Polyhedron	sub-angular	inner plan	medium-grained	1	P_13	Two	Long + Short	3 - Exhausted	Perpendicular	flake, bladelet	Lombardo	22	5	Hard	797
264	P13	Fragmented	Meso-Proximal	13	15	0.866667	2	Initialization	Flake	Total	Total	Linear	Rectilinear	Broken	flat	0	Indet		Pisa	40	73	Radiolarite	52	42	25	74	1.2	2.1	Pebble	Polyhedron	sub-angular	inner plan	medium-grained	1	P_13	Two	Long + Short	3 - Exhausted	Perpendicular	flake, bladelet	Lombardo	22	5	Hard	797
263	P13	Fragmented	Meso-Proximal	12	9	1.33333	4	Production	Backed flake	1-25	Lateral back	Trapeze	Rectilinear	Broken	flat	0	1-Unidirectional		Pisa	40	73	Radiolarite	52	42	25	74	1.2	2.1	Pebble	Polyhedron	sub-angular	inner plan	medium-grained	1	P_13	Two	Long + Short	3 - Exhausted	Perpendicular	flake, bladelet	Lombardo	22	5	Hard	797
268	P13	Fragmented	Composite	16	18	0.888889	4	Production	Chunk	0		Linear	Wavy	Broken	flat	0	4-Multidirectional		Pisa	40	73	Radiolarite	52	42	25	74	1.2	2.1	Pebble	Polyhedron	sub-angular	inner plan	medium-grained	1	P_13	Two	Long + Short	3 - Exhausted	Perpendicular	flake, bladelet	Lombardo	22	5	Hard	797
302	P13	Fragmented	Composite	11	4	2.75	1	Production	Flake	0		Linear	Rectilinear	Plunging	flat	0	1-Unidirectional		Pisa	40	73	Radiolarite	52	42	25	74	1.2	2.1	Pebble	Polyhedron	sub-angular	inner plan	medium-grained	1	P_13	Two	Long + Short	3 - Exhausted	Perpendicular	flake, bladelet	Lombardo	22	5	Hard	797
314	P14	Fragmented	Meso-Proximal	12	6	2	3	Final	Flake	1-25	Lateral	Linear	Rectilinear	Plunging	flat	0	1-Unidirectional		Pisa	14	12	Radiolarite	47	23	17	29	1.8	2.7	Pebble	Polyhedron	angular	inner plan	fine/medium-grained	1	P_14	One	Long	3 - Exhausted	Perpendicular	flake, bladelet	Conforti	2	2	Hard	311
303	P14	Integer	Integer	30	22	1.36364	12	Final	Core	26-50	Lateral back	Trapeze			triangular prism	1	2-Bidirectional		Pisa	14	12	Radiolarite	47	23	17	29	1.8	2.7	Pebble	Polyhedron	angular	inner plan	fine/medium-grained	1	P_14	One	Long	3 - Exhausted	Perpendicular	flake, bladelet	Conforti	2	2	Hard	311
304	P14	Integer	Integer	47	19	2.47368	9	Initialization	Blade	76-99	Semi-total	Trapeze	Wavy	Plunging	flatparalelepiped	0	2-Bidirectional		Pisa	14	12	Radiolarite	47	23	17	29	1.8	2.7	Pebble	Polyhedron	angular	inner plan	fine/medium-grained	1	P_14	One	Long	3 - Exhausted	Perpendicular	flake, bladelet	Conforti	2	2	Hard	311
305	P14	Fragmented	Meso-Distal	12	4	3	1	Initialization	Bladelet	76-99	Semi-total	Linear	Rectilinear	Feather	flat	0	1-Unidirectional		Pisa	14	12	Radiolarite	47	23	17	29	1.8	2.7	Pebble	Polyhedron	angular	inner plan	fine/medium-grained	1	P_14	One	Long	3 - Exhausted	Perpendicular	flake, bladelet	Conforti	2	2	Hard	311
306	P14	Fragmented	Meso-Distal	15	7	2.14286	2	Initialization	Bladelet	Total	Total	Linear	Rectilinear	Feather	flat	0	Indet		Pisa	14	12	Radiolarite	47	23	17	29	1.8	2.7	Pebble	Polyhedron	angular	inner plan	fine/medium-grained	1	P_14	One	Long	3 - Exhausted	Perpendicular	flake, bladelet	Conforti	2	2	Hard	311
307	P14	Integer	Integer	11	3	3.66667	1	Initialization	Bladelet	76-99	Semi-total	Linear	Rectilinear	Feather	flat	0	1-Unidirectional		Pisa	14	12	Radiolarite	47	23	17	29	1.8	2.7	Pebble	Polyhedron	angular	inner plan	fine/medium-grained	1	P_14	One	Long	3 - Exhausted	Perpendicular	flake, bladelet	Conforti	2	2	Hard	311
309	P14	Fragmented	Meso-Distal	17	12	1.41667	5	Initialization	Flake	76-99	Semi-total	Half circles	Rectilinear	Plunging	triangular prism	0	2-Bidirectional		Pisa	14	12	Radiolarite	47	23	17	29	1.8	2.7	Pebble	Polyhedron	angular	inner plan	fine/medium-grained	1	P_14	One	Long	3 - Exhausted	Perpendicular	flake, bladelet	Conforti	2	2	Hard	311
311	P14	Integer	Integer	8	16	0.5	1	Production	Flake	0		Linear	Rectilinear	Hinged	flat	0	Indet		Pisa	14	12	Radiolarite	47	23	17	29	1.8	2.7	Pebble	Polyhedron	angular	inner plan	fine/medium-grained	1	P_14	One	Long	3 - Exhausted	Perpendicular	flake, bladelet	Conforti	2	2	Hard	311
313	P14	Integer	Integer	11	6	1.83333	2	Initialization	Flake	0		Linear	Rectilinear	Hinged	flat	0	1-Unidirectional		Pisa	14	12	Radiolarite	47	23	17	29	1.8	2.7	Pebble	Polyhedron	angular	inner plan	fine/medium-grained	1	P_14	One	Long	3 - Exhausted	Perpendicular	flake, bladelet	Conforti	2	2	Hard	311
308	P14	Fragmented	Distal	9	10	0.9	2	Initialization	Flake	76-99	Semi-total	Linear	Rectilinear	Feather	flat	0	1-Unidirectional		Pisa	14	12	Radiolarite	47	23	17	29	1.8	2.7	Pebble	Polyhedron	angular	inner plan	fine/medium-grained	1	P_14	One	Long	3 - Exhausted	Perpendicular	flake, bladelet	Conforti	2	2	Hard	311
315	P14	Integer	Integer	10	15	0.666667	3	Production	Flake	0	Lateral	Linear	Rectilinear	Hinged	flat	0	2-Bidirectional		Pisa	14	12	Radiolarite	47	23	17	29	1.8	2.7	Pebble	Polyhedron	angular	inner plan	fine/medium-grained	1	P_14	One	Long	3 - Exhausted	Perpendicular	flake, bladelet	Conforti	2	2	Hard	311
316	P14	Integer	Integer	29	18	1.61111	4	Production	Backed flake	26-50	Lateral back	Linear	Rectilinear	Feather	flat	0	2-Bidirectional		Pisa	14	12	Radiolarite	47	23	17	29	1.8	2.7	Pebble	Polyhedron	angular	inner plan	fine/medium-grained	1	P_14	One	Long	3 - Exhausted	Perpendicular	flake, bladelet	Conforti	2	2	Hard	311
312	P14	Integer	Integer	14	12	1.16667	1	Initialization	Flake	76-99	Semi-total	Linear	Rectilinear	Broken	flat	0	1-Unidirectional		Pisa	14	12	Radiolarite	47	23	17	29	1.8	2.7	Pebble	Polyhedron	angular	inner plan	fine/medium-grained	1	P_14	One	Long	3 - Exhausted	Perpendicular	flake, bladelet	Conforti	2	2	Hard	311
310	P14	Integer	Integer	18	13	1.38462	5	Production	Flake	0		Trapeze	Rectilinear	Broken	Truncated pyramid/frustum	0	1-Unidirectional		Pisa	14	12	Radiolarite	47	23	17	29	1.8	2.7	Pebble	Polyhedron	angular	inner plan	fine/medium-grained	1	P_14	One	Long	3 - Exhausted	Perpendicular	flake, bladelet	Conforti	2	2	Hard	311
318	P15	Integer	Integer	21	8	2.625	3	Initialization	Bladelet	26-50	Lateral	Trapeze	Rectilinear	Feather	flat	0	2-Bidirectional		Pisa	12	34	Radiolarite	27	23	21	12	1.1	1.2	Pebble	Flat-convex	angular	inner plan	fine/medium-grained	1	P_15	One	Long	3 - Exhausted	Perpendicular	flake, bladelet	Conforti	11	4	Hard	320
328	P15	Integer	Integer	18	10	1.8	1	Production	Flake	0		Linear	Rectilinear	Feather	flat	0	4-Multidirectional		Pisa	12	34	Radiolarite	27	23	21	12	1.1	1.2	Pebble	Flat-convex	angular	inner plan	fine/medium-grained	1	P_15	One	Long	3 - Exhausted	Perpendicular	flake, bladelet	Conforti	11	4	Hard	320
327	P15	Integer	Integer	24	18	1.33333	6	Production	Backed flake	51-75	Lateral back	Trapeze	Wavy	Plunging	Truncated pyramid/frustum	0	2-Bidirectional		Pisa	12	34	Radiolarite	27	23	21	12	1.1	1.2	Pebble	Flat-convex	angular	inner plan	fine/medium-grained	1	P_15	One	Long	3 - Exhausted	Perpendicular	flake, bladelet	Conforti	11	4	Hard	320
326	P15	Integer	Integer	23	16	1.4375	7	Initialization	Flake	Total	Total	Half circles	Rectilinear	Plunging	Truncated pyramid/frustum	0	2-Bidirectional		Pisa	12	34	Radiolarite	27	23	21	12	1.1	1.2	Pebble	Flat-convex	angular	inner plan	fine/medium-grained	1	P_15	One	Long	3 - Exhausted	Perpendicular	flake, bladelet	Conforti	11	4	Hard	320
325	P15	Integer	Integer	10	3	3.33333	1	Production	Bladelet	0		Triangular	Rectilinear	Feather	flat	0	1-Unidirectional		Pisa	12	34	Radiolarite	27	23	21	12	1.1	1.2	Pebble	Flat-convex	angular	inner plan	fine/medium-grained	1	P_15	One	Long	3 - Exhausted	Perpendicular	flake, bladelet	Conforti	11	4	Hard	320
324	P15	Integer	Integer	10	4	2.5	1	Production	Bladelet	0		Triangular	Rectilinear	Feather	flat	0	1-Unidirectional		Pisa	12	34	Radiolarite	27	23	21	12	1.1	1.2	Pebble	Flat-convex	angular	inner plan	fine/medium-grained	1	P_15	One	Long	3 - Exhausted	Perpendicular	flake, bladelet	Conforti	11	4	Hard	320
323	P15	Integer	Integer	16	4	4	3	Production	Bladelet	26-50	Lateral back	Trapeze	Twisted	Plunging	flat	0	2-Bidirectional		Pisa	12	34	Radiolarite	27	23	21	12	1.1	1.2	Pebble	Flat-convex	angular	inner plan	fine/medium-grained	1	P_15	One	Long	3 - Exhausted	Perpendicular	flake, bladelet	Conforti	11	4	Hard	320
322	P15	Integer	Integer	17	6	2.83333	2	Production	Bladelet	26-50	Lateral	Trapeze	Twisted	Feather	flat	0	2-Bidirectional		Pisa	12	34	Radiolarite	27	23	21	12	1.1	1.2	Pebble	Flat-convex	angular	inner plan	fine/medium-grained	1	P_15	One	Long	3 - Exhausted	Perpendicular	flake, bladelet	Conforti	11	4	Hard	320
321	P15	Integer	Integer	11	6	1.83333	1	Production	Backed flake	1-25	Lateral back	Linear	Rectilinear	Feather	flat	0	1-Unidirectional		Pisa	12	34	Radiolarite	27	23	21	12	1.1	1.2	Pebble	Flat-convex	angular	inner plan	fine/medium-grained	1	P_15	One	Long	3 - Exhausted	Perpendicular	flake, bladelet	Conforti	11	4	Hard	320
319	P15	Integer	Integer	13	9	1.44444	4	Initialization	Flake	51-75	Lateral	Trapeze	Rectilinear	Plunging	flat	0	2-Bidirectional		Pisa	12	34	Radiolarite	27	23	21	12	1.1	1.2	Pebble	Flat-convex	angular	inner plan	fine/medium-grained	1	P_15	One	Long	3 - Exhausted	Perpendicular	flake, bladelet	Conforti	11	4	Hard	320
317	P15	Integer	Integer	17	11	1.54545	6	Final	Core	51-75	Proximal	Trapeze			flatparalelepiped	2	2-Bidirectional		Pisa	12	34	Radiolarite	27	23	21	12	1.1	1.2	Pebble	Flat-convex	angular	inner plan	fine/medium-grained	1	P_15	One	Long	3 - Exhausted	Perpendicular	flake, bladelet	Conforti	11	4	Hard	320
320	P15	Integer	Integer	13	9	1.44444	3	Production	Backed flake	26-50	Lateral back	Triangular	Rectilinear	Broken	flat	0	2-Bidirectional		Pisa	12	34	Radiolarite	27	23	21	12	1.1	1.2	Pebble	Flat-convex	angular	inner plan	fine/medium-grained	1	P_15	One	Long	3 - Exhausted	Perpendicular	flake, bladelet	Conforti	11	4	Hard	320
360	P16	Integer	Integer	14	8	1.75	6	Production	Backed flake	51-75	Lateral back	Triangular	Rectilinear	Plunging	flat	0	1-Unidirectional		Pisa	68	40	Radiolarite	56	49	24	97	1.1	2.3	Pebble	Polyhedron	angular	inner plan	medium-grained	0	P_16	One	Long	3 - Exhausted	Perpendicular	flake, bladelet	Conforti	10-11-12Br	4
380	P16	Fragmented	Composite	18	12	1.5	10	Production	Chunk	76-99	Semi-total	Irregular			poligonal	0	4-Multidirectional		Pisa	68	40	Radiolarite	56	49	24	97	1.1	2.3	Pebble	Polyhedron	angular	inner plan	medium-grained	0	P_16	One	Long	3 - Exhausted	Perpendicular	flake, bladelet	Conforti	10-11-12Br	4
381	P16	Fragmented	Proximal	17	8	2.125	8	Production	Bladelet	26-50	Proximal	Triangular	Rectilinear	Broken	flat	0	2-Bidirectional	Anvil	Pisa	68	40	Radiolarite	56	49	24	97	1.1	2.3	Pebble	Polyhedron	angular	inner plan	medium-grained	0	P_16	One	Long	3 - Exhausted	Perpendicular	flake, bladelet	Conforti	10-11-12Br	4
368	P16	Fragmented	Proximal	9	11	0.818182	1	Production	Flake	0		Linear	Rectilinear	Broken	flat	0	1-Unidirectional		Pisa	68	40	Radiolarite	56	49	24	97	1.1	2.3	Pebble	Polyhedron	angular	inner plan	medium-grained	0	P_16	One	Long	3 - Exhausted	Perpendicular	flake, bladelet	Conforti	10-11-12Br	4
396	P16	Fragmented	Composite	26	11	2.36364	8	Production	Chunk	51-75	Lateral	Triangular			flat	0	4-Multidirectional		Pisa	68	40	Radiolarite	56	49	24	97	1.1	2.3	Pebble	Polyhedron	angular	inner plan	medium-grained	0	P_16	One	Long	3 - Exhausted	Perpendicular	flake, bladelet	Conforti	10-11-12Br	4
366	P16	Integer	Integer	20	13	1.53846	4	Production	Flake	0		Triangular	Rectilinear	Plunging	flat	0	1-Unidirectional		Pisa	68	40	Radiolarite	56	49	24	97	1.1	2.3	Pebble	Polyhedron	angular	inner plan	medium-grained	0	P_16	One	Long	3 - Exhausted	Perpendicular	flake, bladelet	Conforti	10-11-12Br	4
365	P16	Fragmented	Proximal	6	10	0.6	3	Production	Flake	0		Trapeze	Rectilinear	Broken	flat	0	1-Unidirectional		Pisa	68	40	Radiolarite	56	49	24	97	1.1	2.3	Pebble	Polyhedron	angular	inner plan	medium-grained	0	P_16	One	Long	3 - Exhausted	Perpendicular	flake, bladelet	Conforti	10-11-12Br	4
364	P16	Integer	Integer	10	10	1	3	Production	Flake	0		Trapeze	Wavy	Feather	flat	0	1-Unidirectional		Pisa	68	40	Radiolarite	56	49	24	97	1.1	2.3	Pebble	Polyhedron	angular	inner plan	medium-grained	0	P_16	One	Long	3 - Exhausted	Perpendicular	flake, bladelet	Conforti	10-11-12Br	4
363	P16	Fragmented	Proximal	11	9	1.22222	2	Production	Flake	0		Linear	Rectilinear	Broken	flat	0	1-Unidirectional		Pisa	68	40	Radiolarite	56	49	24	97	1.1	2.3	Pebble	Polyhedron	angular	inner plan	medium-grained	0	P_16	One	Long	3 - Exhausted	Perpendicular	flake, bladelet	Conforti	10-11-12Br	4
378	P16	Fragmented	Composite	19	10	1.9	7	Initialization	Chunk	51-75	Semi-total	Triangular			flat	0	4-Multidirectional		Pisa	68	40	Radiolarite	56	49	24	97	1.1	2.3	Pebble	Polyhedron	angular	inner plan	medium-grained	0	P_16	One	Long	3 - Exhausted	Perpendicular	flake, bladelet	Conforti	10-11-12Br	4
361	P16	Fragmented	Proximal	8	14	0.571429	2	Production	Flake	0		Linear	Rectilinear	Plunging	flat	0	4-Multidirectional		Pisa	68	40	Radiolarite	56	49	24	97	1.1	2.3	Pebble	Polyhedron	angular	inner plan	medium-grained	0	P_16	One	Long	3 - Exhausted	Perpendicular	flake, bladelet	Conforti	10-11-12Br	4
377	p16	Integer	Integer	12	4	3	1	Production	Bladelet	0		Triangular	Twisted	Feather	flat	0	1-Unidirectional		Pisa	68	40	Radiolarite	56	49	24	97	1.1	2.3	Pebble	Polyhedron	angular	inner plan	medium-grained	0	P_16	One	Long	3 - Exhausted	Perpendicular	flake, bladelet	Conforti	10-11-12Br	4
359	P16	Integer	Integer	11	10	1.1	3	Production	Flake	0		Linear	Wavy	Feather	flat	0	1-Unidirectional		Pisa	68	40	Radiolarite	56	49	24	97	1.1	2.3	Pebble	Polyhedron	angular	inner plan	medium-grained	0	P_16	One	Long	3 - Exhausted	Perpendicular	flake, bladelet	Conforti	10-11-12Br	4
358	P16	Integer	Integer	14	11	1.27273	4	Production	Flake	0		Triangular	Wavy	Plunging	flat	0	1-Unidirectional		Pisa	68	40	Radiolarite	56	49	24	97	1.1	2.3	Pebble	Polyhedron	angular	inner plan	medium-grained	0	P_16	One	Long	3 - Exhausted	Perpendicular	flake, bladelet	Conforti	10-11-12Br	4
357	P16	Integer	Integer	12	9	1.33333	2	Production	Flake	0		Linear	Rectilinear	Feather	flat	0	1-Unidirectional		Pisa	68	40	Radiolarite	56	49	24	97	1.1	2.3	Pebble	Polyhedron	angular	inner plan	medium-grained	0	P_16	One	Long	3 - Exhausted	Perpendicular	flake, bladelet	Conforti	10-11-12Br	4
356	P16	Integer	Integer	10	16	0.625	3	Initialization	Flake	76-99	Semi-total	Linear	Rectilinear	Broken	flat	0	Indet		Pisa	68	40	Radiolarite	56	49	24	97	1.1	2.3	Pebble	Polyhedron	angular	inner plan	medium-grained	0	P_16	One	Long	3 - Exhausted	Perpendicular	flake, bladelet	Conforti	10-11-12Br	4
355	P16	Fragmented	Distal	16	6	2.66667	2	Production	Bladelet	0		Linear	Wavy	Feather	flat	0	3-Orthogonal		Pisa	68	40	Radiolarite	56	49	24	97	1.1	2.3	Pebble	Polyhedron	angular	inner plan	medium-grained	0	P_16	One	Long	3 - Exhausted	Perpendicular	flake, bladelet	Conforti	10-11-12Br	4
354	P16	Integer	Integer	11	12	0.916667	3	Production	Flake	0		Linear	Wavy	Feather	flat	0	1-Unidirectional		Pisa	68	40	Radiolarite	56	49	24	97	1.1	2.3	Pebble	Polyhedron	angular	inner plan	medium-grained	0	P_16	One	Long	3 - Exhausted	Perpendicular	flake, bladelet	Conforti	10-11-12Br	4
353	P16	Integer	Integer	12	11	1.09091	2	Production	Flake	0		Linear	Rectilinear	Feather	flat	0	1-Unidirectional		Pisa	68	40	Radiolarite	56	49	24	97	1.1	2.3	Pebble	Polyhedron	angular	inner plan	medium-grained	0	P_16	One	Long	3 - Exhausted	Perpendicular	flake, bladelet	Conforti	10-11-12Br	4
352	P16	Fragmented	Meso-Distal	12	9	1.33333	5	Production	Flake	0		Triangular	Convex	Hinged	flat	0	3-Orthogonal		Pisa	68	40	Radiolarite	56	49	24	97	1.1	2.3	Pebble	Polyhedron	angular	inner plan	medium-grained	0	P_16	One	Long	3 - Exhausted	Perpendicular	flake, bladelet	Conforti	10-11-12Br	4
351	P16	Fragmented	Meso-Proximal	15	9	1.66667	2	Production	Flake	0		Linear	Rectilinear	Broken	flat	0	1-Unidirectional		Pisa	68	40	Radiolarite	56	49	24	97	1.1	2.3	Pebble	Polyhedron	angular	inner plan	medium-grained	0	P_16	One	Long	3 - Exhausted	Perpendicular	flake, bladelet	Conforti	10-11-12Br	4
350	P16	Fragmented	Mesial	13	12	1.08333	3	Initialization	Flake	Total	Total	Half circles	Rectilinear	Broken	flat	0	Indet		Pisa	68	40	Radiolarite	56	49	24	97	1.1	2.3	Pebble	Polyhedron	angular	inner plan	medium-grained	0	P_16	One	Long	3 - Exhausted	Perpendicular	flake, bladelet	Conforti	10-11-12Br	4
362	P16	Integer	Integer	22	12	1.83333	3	Production	Flake	0		Trapeze	Rectilinear	Broken	flat	0	2-Bidirectional		Pisa	68	40	Radiolarite	56	49	24	97	1.1	2.3	Pebble	Polyhedron	angular	inner plan	medium-grained	0	P_16	One	Long	3 - Exhausted	Perpendicular	flake, bladelet	Conforti	10-11-12Br	4
392	P16	Fragmented	Composite	20	20	1	9	Production	Chunk	26-50	Lateral	Irregular			flatparalelepiped	0	4-Multidirectional		Pisa	68	40	Radiolarite	56	49	24	97	1.1	2.3	Pebble	Polyhedron	angular	inner plan	medium-grained	0	P_16	One	Long	3 - Exhausted	Perpendicular	flake, bladelet	Conforti	10-11-12Br	4
383	P16	Fragmented	Meso-Proximal	15	6	2.5	3	Initialization	Bladelet	51-75	Lateral	Triangular	Rectilinear	Broken	flat	0	2-Bidirectional		Pisa	68	40	Radiolarite	56	49	24	97	1.1	2.3	Pebble	Polyhedron	angular	inner plan	medium-grained	0	P_16	One	Long	3 - Exhausted	Perpendicular	flake, bladelet	Conforti	10-11-12Br	4
384	P16	Fragmented	Meso-Proximal	17	7	2.42857	2	Initialization	Bladelet	76-99	Semi-total	Half circles	Rectilinear	Broken	flat	0	1-Unidirectional		Pisa	68	40	Radiolarite	56	49	24	97	1.1	2.3	Pebble	Polyhedron	angular	inner plan	medium-grained	0	P_16	One	Long	3 - Exhausted	Perpendicular	flake, bladelet	Conforti	10-11-12Br	4
385	P16	Fragmented	Meso-Proximal	11	5	2.2	3	Production	Bladelet	0		Triangular	Wavy	Broken	flat	0	2-Bidirectional		Pisa	68	40	Radiolarite	56	49	24	97	1.1	2.3	Pebble	Polyhedron	angular	inner plan	medium-grained	0	P_16	One	Long	3 - Exhausted	Perpendicular	flake, bladelet	Conforti	10-11-12Br	4
386	P16	Fragmented	Meso-Distal	12	5	2.4	2	Production	Bladelet	0		Triangular	Rectilinear	Feather	flat	0	1-Unidirectional		Pisa	68	40	Radiolarite	56	49	24	97	1.1	2.3	Pebble	Polyhedron	angular	inner plan	medium-grained	0	P_16	One	Long	3 - Exhausted	Perpendicular	flake, bladelet	Conforti	10-11-12Br	4
387	P16	Integer	Integer	12	4	3	2	Production	Bladelet	0		Triangular	Rectilinear	Feather	flat	0	1-Unidirectional		Pisa	68	40	Radiolarite	56	49	24	97	1.1	2.3	Pebble	Polyhedron	angular	inner plan	medium-grained	0	P_16	One	Long	3 - Exhausted	Perpendicular	flake, bladelet	Conforti	10-11-12Br	4
388	P16	Fragmented	Meso-Distal	19	6	3.16667	4	Production	Bladelet	1-25	Lateral	Triangular	Concave	Feather	flat	0	4-Multidirectional		Pisa	68	40	Radiolarite	56	49	24	97	1.1	2.3	Pebble	Polyhedron	angular	inner plan	medium-grained	0	P_16	One	Long	3 - Exhausted	Perpendicular	flake, bladelet	Conforti	10-11-12Br	4
367	P16	Fragmented	Meso-Distal	20	16	1.25	7	Production	Flake	0		Triangular	Rectilinear	Plunging	flat	0	1-Unidirectional		Pisa	68	40	Radiolarite	56	49	24	97	1.1	2.3	Pebble	Polyhedron	angular	inner plan	medium-grained	0	P_16	One	Long	3 - Exhausted	Perpendicular	flake, bladelet	Conforti	10-11-12Br	4
389	P16	Fragmented	Composite	26	6	4.33333	6	Production	Chunk	0		Triangular			flat	0	4-Multidirectional		Pisa	68	40	Radiolarite	56	49	24	97	1.1	2.3	Pebble	Polyhedron	angular	inner plan	medium-grained	0	P_16	One	Long	3 - Exhausted	Perpendicular	flake, bladelet	Conforti	10-11-12Br	4
349	P16	Integer	Integer	14	7	2	2	Initialization	Flake	76-99	Semi-total	Linear	Wavy	Feather	flat	0	1-Unidirectional		Pisa	68	40	Radiolarite	56	49	24	97	1.1	2.3	Pebble	Polyhedron	angular	inner plan	medium-grained	0	P_16	One	Long	3 - Exhausted	Perpendicular	flake, bladelet	Conforti	10-11-12Br	4
379	P16	Fragmented	Composite	15	13	1.15385	6	Production	Chunk	0		Irregular			flat	0	4-Multidirectional		Pisa	68	40	Radiolarite	56	49	24	97	1.1	2.3	Pebble	Polyhedron	angular	inner plan	medium-grained	0	P_16	One	Long	3 - Exhausted	Perpendicular	flake, bladelet	Conforti	10-11-12Br	4
391	P16	Fragmented	Composite	26	15	1.73333	6	Production	Chunk	0		Irregular			flat	0	4-Multidirectional		Pisa	68	40	Radiolarite	56	49	24	97	1.1	2.3	Pebble	Polyhedron	angular	inner plan	medium-grained	0	P_16	One	Long	3 - Exhausted	Perpendicular	flake, bladelet	Conforti	10-11-12Br	4
370	P16	Integer	Integer	10	12	0.833333	1	Production	Flake	0		Linear	Rectilinear	Broken	flat	0	1-Unidirectional		Pisa	68	40	Radiolarite	56	49	24	97	1.1	2.3	Pebble	Polyhedron	angular	inner plan	medium-grained	0	P_16	One	Long	3 - Exhausted	Perpendicular	flake, bladelet	Conforti	10-11-12Br	4
393	P16	Fragmented	Composite	25	16	1.5625	10	Production	Chunk	1-25	Lateral	Trapeze			flatparalelepiped	0	4-Multidirectional		Pisa	68	40	Radiolarite	56	49	24	97	1.1	2.3	Pebble	Polyhedron	angular	inner plan	medium-grained	0	P_16	One	Long	3 - Exhausted	Perpendicular	flake, bladelet	Conforti	10-11-12Br	4
394	P16	Fragmented	Composite	20	10	2	8	Production	Chunk	0		Irregular			flat	0	4-Multidirectional		Pisa	68	40	Radiolarite	56	49	24	97	1.1	2.3	Pebble	Polyhedron	angular	inner plan	medium-grained	0	P_16	One	Long	3 - Exhausted	Perpendicular	flake, bladelet	Conforti	10-11-12Br	4
395	P16	Fragmented	Composite	19	7	2.71429	4	Initialization	Chunk	76-99	Semi-total	Irregular			flat	0	4-Multidirectional		Pisa	68	40	Radiolarite	56	49	24	97	1.1	2.3	Pebble	Polyhedron	angular	inner plan	medium-grained	0	P_16	One	Long	3 - Exhausted	Perpendicular	flake, bladelet	Conforti	10-11-12Br	4
371	P16	Fragmented	Meso-Distal	11	5	2.2	3	Production	Bladelet	26-50	Lateral	Irregular	Rectilinear	Feather	flat	0	1-Unidirectional		Pisa	68	40	Radiolarite	56	49	24	97	1.1	2.3	Pebble	Polyhedron	angular	inner plan	medium-grained	0	P_16	One	Long	3 - Exhausted	Perpendicular	flake, bladelet	Conforti	10-11-12Br	4
382	P16	Integer	Integer	15	7	2.14286	2	Production	Bladelet	0		Linear	Twisted	Feather	flat	0	1-Unidirectional		Pisa	68	40	Radiolarite	56	49	24	97	1.1	2.3	Pebble	Polyhedron	angular	inner plan	medium-grained	0	P_16	One	Long	3 - Exhausted	Perpendicular	flake, bladelet	Conforti	10-11-12Br	4
372	P16	Integer	Integer	23	10	2.3	3	Production	Bladelet	1-25	Proximal	Trapeze	Rectilinear	Feather	flat	0	1-Unidirectional		Pisa	68	40	Radiolarite	56	49	24	97	1.1	2.3	Pebble	Polyhedron	angular	inner plan	medium-grained	0	P_16	One	Long	3 - Exhausted	Perpendicular	flake, bladelet	Conforti	10-11-12Br	4
373	P16	Integer	Integer	21	9	2.33333	5	Production	Bladelet	0		Triangular	Rectilinear	Feather	flat	0	1-Unidirectional		Pisa	68	40	Radiolarite	56	49	24	97	1.1	2.3	Pebble	Polyhedron	angular	inner plan	medium-grained	0	P_16	One	Long	3 - Exhausted	Perpendicular	flake, bladelet	Conforti	10-11-12Br	4
374	P16	Fragmented	Mesial	22	5	4.4	3	Production	Bladelet	0		Triangular	Rectilinear	Broken	flat	0	1-Unidirectional		Pisa	68	40	Radiolarite	56	49	24	97	1.1	2.3	Pebble	Polyhedron	angular	inner plan	medium-grained	0	P_16	One	Long	3 - Exhausted	Perpendicular	flake, bladelet	Conforti	10-11-12Br	4
375	P16	Integer	Integer	26	12	2.16667	3	Initialization	Bladelet	76-99	Semi-total	Triangular	Wavy	Feather	flat	0	1-Unidirectional		Pisa	68	40	Radiolarite	56	49	24	97	1.1	2.3	Pebble	Polyhedron	angular	inner plan	medium-grained	0	P_16	One	Long	3 - Exhausted	Perpendicular	flake, bladelet	Conforti	10-11-12Br	4
376	P16	Integer	Integer	24	7	3.42857	3	Initialization	Bladelet	76-99	Semi-total	Trapeze	Wavy	Plunging	flat	0	1-Unidirectional		Pisa	68	40	Radiolarite	56	49	24	97	1.1	2.3	Pebble	Polyhedron	angular	inner plan	medium-grained	0	P_16	One	Long	3 - Exhausted	Perpendicular	flake, bladelet	Conforti	10-11-12Br	4
390	P16	Integer	Integer	31	13	2.38462	9	Production	Blade	0		Trapeze	Wavy	Plunging	flat	0	2-Bidirectional		Pisa	68	40	Radiolarite	56	49	24	97	1.1	2.3	Pebble	Polyhedron	angular	inner plan	medium-grained	0	P_16	One	Long	3 - Exhausted	Perpendicular	flake, bladelet	Conforti	10-11-12Br	4
331	P16	Integer	Integer	22	12	1.83333	5	Final	Flake	0		Triangular	Twisted	Plunging	flat	0	2-Bidirectional		Pisa	68	40	Radiolarite	56	49	24	97	1.1	2.3	Pebble	Polyhedron	angular	inner plan	medium-grained	0	P_16	One	Long	3 - Exhausted	Perpendicular	flake, bladelet	Conforti	10-11-12Br	4
369	p16	Integer	Integer	14	13	1.07692	2	Initialization	Flake	Total	Total	Linear	Rectilinear	Feather	flat	0	Indet		Pisa	68	40	Radiolarite	56	49	24	97	1.1	2.3	Pebble	Polyhedron	angular	inner plan	medium-grained	0	P_16	One	Long	3 - Exhausted	Perpendicular	flake, bladelet	Conforti	10-11-12Br	4
348	P16	Fragmented	Meso-Proximal	13	16	0.8125	3	Initialization	Flake	26-50	Transversal	Linear	Rectilinear	Broken	flat	0	1-Unidirectional		Pisa	68	40	Radiolarite	56	49	24	97	1.1	2.3	Pebble	Polyhedron	angular	inner plan	medium-grained	0	P_16	One	Long	3 - Exhausted	Perpendicular	flake, bladelet	Conforti	10-11-12Br	4
330	P16	Integer	Integer	21	17	1.23529	9	Final	Flake	76-99	Lateral	Trapeze	Rectilinear	Plunging	triangular prism	0	2-Bidirectional		Pisa	68	40	Radiolarite	56	49	24	97	1.1	2.3	Pebble	Polyhedron	angular	inner plan	medium-grained	0	P_16	One	Long	3 - Exhausted	Perpendicular	flake, bladelet	Conforti	10-11-12Br	4
332	P16	Integer	Integer	22	13	1.69231	7	Final	Flake	26-50	Proximal	Irregular	Rectilinear	Plunging	flat	0	2-Bidirectional		Pisa	68	40	Radiolarite	56	49	24	97	1.1	2.3	Pebble	Polyhedron	angular	inner plan	medium-grained	0	P_16	One	Long	3 - Exhausted	Perpendicular	flake, bladelet	Conforti	10-11-12Br	4
333	P16	Integer	Integer	24	14	1.71429	9	Final	Flake	76-99	Lateral back	Half circles	Rectilinear	Plunging	flatparalelepiped	0	2-Bidirectional		Pisa	68	40	Radiolarite	56	49	24	97	1.1	2.3	Pebble	Polyhedron	angular	inner plan	medium-grained	0	P_16	One	Long	3 - Exhausted	Perpendicular	flake, bladelet	Conforti	10-11-12Br	4
334	P16	Integer	Integer	22	15	1.46667	8	Final	Flake	76-99	Lateral	Half circles	Rectilinear	Plunging	flat	0	2-Bidirectional		Pisa	68	40	Radiolarite	56	49	24	97	1.1	2.3	Pebble	Polyhedron	angular	inner plan	medium-grained	0	P_16	One	Long	3 - Exhausted	Perpendicular	flake, bladelet	Conforti	10-11-12Br	4
335	P16	Integer	Integer	25	11	2.27273	13	Final	Flake	51-75	Lateral back	Trapeze	Rectilinear	Plunging	flatparalelepiped	0	2-Bidirectional		Pisa	68	40	Radiolarite	56	49	24	97	1.1	2.3	Pebble	Polyhedron	angular	inner plan	medium-grained	0	P_16	One	Long	3 - Exhausted	Perpendicular	flake, bladelet	Conforti	10-11-12Br	4
336	P16	Integer	Integer	25	17	1.47059	8	Final	Flake	0		Half circles	Rectilinear	Plunging	flatparalelepiped	0	2-Bidirectional		Pisa	68	40	Radiolarite	56	49	24	97	1.1	2.3	Pebble	Polyhedron	angular	inner plan	medium-grained	0	P_16	One	Long	3 - Exhausted	Perpendicular	flake, bladelet	Conforti	10-11-12Br	4
337	P16	Integer	Integer	24	13	1.84615	8	Final	Flake	0		Trapeze	Wavy	Plunging	flat	0	2-Bidirectional		Pisa	68	40	Radiolarite	56	49	24	97	1.1	2.3	Pebble	Polyhedron	angular	inner plan	medium-grained	0	P_16	One	Long	3 - Exhausted	Perpendicular	flake, bladelet	Conforti	10-11-12Br	4
345	P16	Integer	Integer	12	9	1.33333	3	Production	Flake	0		Triangular	Rectilinear	Feather	flat	0	2-Bidirectional		Pisa	68	40	Radiolarite	56	49	24	97	1.1	2.3	Pebble	Polyhedron	angular	inner plan	medium-grained	0	P_16	One	Long	3 - Exhausted	Perpendicular	flake, bladelet	Conforti	10-11-12Br	4
339	P16	Integer	Integer	24	10	2.4	6	Final	Bladelet	1-25	Lateral back	Trapeze	Rectilinear	Feather	flat	0	2-Bidirectional		Pisa	68	40	Radiolarite	56	49	24	97	1.1	2.3	Pebble	Polyhedron	angular	inner plan	medium-grained	0	P_16	One	Long	3 - Exhausted	Perpendicular	flake, bladelet	Conforti	10-11-12Br	4
340	P16	Integer	Integer	27	19	1.42105	5	Initialization	Flake	76-99	Semi-total	Half circles	Rectilinear	Broken	flat	0	1-Unidirectional		Pisa	68	40	Radiolarite	56	49	24	97	1.1	2.3	Pebble	Polyhedron	angular	inner plan	medium-grained	0	P_16	One	Long	3 - Exhausted	Perpendicular	flake, bladelet	Conforti	10-11-12Br	4
341	P16	Fragmented	Meso-Proximal	16	18	0.888889	3	Production	Flake	0		Linear	Wavy	Broken	flat	0	4-Multidirectional		Pisa	68	40	Radiolarite	56	49	24	97	1.1	2.3	Pebble	Polyhedron	angular	inner plan	medium-grained	0	P_16	One	Long	3 - Exhausted	Perpendicular	flake, bladelet	Conforti	10-11-12Br	4
342	P16	Fragmented	Meso-Proximal	15	19	0.789474	5	Initialization	Flake	76-99	Semi-total	Half circles	Wavy	Broken	flat	0	1-Unidirectional		Pisa	68	40	Radiolarite	56	49	24	97	1.1	2.3	Pebble	Polyhedron	angular	inner plan	medium-grained	0	P_16	One	Long	3 - Exhausted	Perpendicular	flake, bladelet	Conforti	10-11-12Br	4
343	P16	Fragmented	Meso-Proximal	21	18	1.16667	7	Production	Flake	26-50	Lateral	Irregular	Twisted	Plunging	flat	0	2-Bidirectional		Pisa	68	40	Radiolarite	56	49	24	97	1.1	2.3	Pebble	Polyhedron	angular	inner plan	medium-grained	0	P_16	One	Long	3 - Exhausted	Perpendicular	flake, bladelet	Conforti	10-11-12Br	4
344	P16	Fragmented	Meso-Proximal	12	15	0.8	6	Initialization	Flake	76-99	Semi-total	Half circles	Rectilinear	Broken	flat	0	1-Unidirectional		Pisa	68	40	Radiolarite	56	49	24	97	1.1	2.3	Pebble	Polyhedron	angular	inner plan	medium-grained	0	P_16	One	Long	3 - Exhausted	Perpendicular	flake, bladelet	Conforti	10-11-12Br	4
346	P16	Integer	Integer	18	11	1.63636	6	Production	Flake	51-75	Lateral	Half circles	Rectilinear	Plunging	flat	0	2-Bidirectional		Pisa	68	40	Radiolarite	56	49	24	97	1.1	2.3	Pebble	Polyhedron	angular	inner plan	medium-grained	0	P_16	One	Long	3 - Exhausted	Perpendicular	flake, bladelet	Conforti	10-11-12Br	4
347	P16	Fragmented	Meso-Distal	18	10	1.8	6	Initialization	Flake	76-99	Lateral	Triangular	Twisted	Plunging	flat	0	3-Orthogonal		Pisa	68	40	Radiolarite	56	49	24	97	1.1	2.3	Pebble	Polyhedron	angular	inner plan	medium-grained	0	P_16	One	Long	3 - Exhausted	Perpendicular	flake, bladelet	Conforti	10-11-12Br	4
329	P16	Fragmented	Composite	22	18	1.22222	9	Final	Chunk	0		Irregular	Rectilinear		poligonal	0	4-Multidirectional		Pisa	68	40	Radiolarite	56	49	24	97	1.1	2.3	Pebble	Polyhedron	angular	inner plan	medium-grained	0	P_16	One	Long	3 - Exhausted	Perpendicular	flake, bladelet	Conforti	10-11-12Br	4
338	P16	Integer	Integer	24	14	1.71429	8	Final	Flake	1-25	Lateral	Triangular	Rectilinear	Plunging	flat	0	2-Bidirectional		Pisa	68	40	Radiolarite	56	49	24	97	1.1	2.3	Pebble	Polyhedron	angular	inner plan	medium-grained	0	P_16	One	Long	3 - Exhausted	Perpendicular	flake, bladelet	Conforti	10-11-12Br	4
413	P17	Integer	Integer	13	10	1.3	4	Production	Backed flake	26-50	Lateral back	Triangular	Convex	Feather	flat	0	2-Bidirectional		Pisa	66	72 (27)	Radiolarite	50	41	39	70	1.2	1.2	Core	Polyhedron	angular	inner plan	fine/medium-grained	2	P_17	One	Long	3 - Exhausted	Perpendicular	flake, bladelet	Lombardo	19	4	Soft	385
414	P17	Integer	Integer	11	17	0.647059	2	Production	Flake	0		Linear	Rectilinear	Feather	flat	0	2-Bidirectional		Pisa	66	72 (27)	Radiolarite	50	41	39	70	1.2	1.2	Core	Polyhedron	angular	inner plan	fine/medium-grained	2	P_17	One	Long	3 - Exhausted	Perpendicular	flake, bladelet	Lombardo	19	4	Soft	385
415	P17	Integer	Integer	11	17	0.647059	4	Production	Flake	0		Irregular	Rectilinear	Feather	flat	0	2-Bidirectional		Pisa	66	72 (27)	Radiolarite	50	41	39	70	1.2	1.2	Core	Polyhedron	angular	inner plan	fine/medium-grained	2	P_17	One	Long	3 - Exhausted	Perpendicular	flake, bladelet	Lombardo	19	4	Soft	385
412	P17	Integer	Integer	19	19	1	5	Production	Flake	1-25	Lateral	Trapeze	Rectilinear	Hinged	flat	0	1-Unidirectional		Pisa	66	72 (27)	Radiolarite	50	41	39	70	1.2	1.2	Core	Polyhedron	angular	inner plan	fine/medium-grained	2	P_17	One	Long	3 - Exhausted	Perpendicular	flake, bladelet	Lombardo	19	4	Soft	385
417	P17	Fragmented	Meso-Distal	17	9	1.88889	5	Production	Flake	0		Triangular	Rectilinear	Plunging	flat	0	3-Orthogonal		Pisa	66	72 (27)	Radiolarite	50	41	39	70	1.2	1.2	Core	Polyhedron	angular	inner plan	fine/medium-grained	2	P_17	One	Long	3 - Exhausted	Perpendicular	flake, bladelet	Lombardo	19	4	Soft	385
445	P17	Integer	Integer	29	15	1.93333	4	Production	Flake	1-25	Lateral	Trapeze	Rectilinear	Plunging	flat	0	1-Unidirectional		Pisa	66	72 (27)	Radiolarite	50	41	39	70	1.2	1.2	Core	Polyhedron	angular	inner plan	fine/medium-grained	2	P_17	One	Long	3 - Exhausted	Perpendicular	flake, bladelet	Lombardo	19	4	Soft	385
416	P17	Fragmented	Meso-Distal	16	16	1	8	Initialization	Flake	51-75	Lateral	Half circles	Wavy	Feather	flat	0	2-Bidirectional		Pisa	66	72 (27)	Radiolarite	50	41	39	70	1.2	1.2	Core	Polyhedron	angular	inner plan	fine/medium-grained	2	P_17	One	Long	3 - Exhausted	Perpendicular	flake, bladelet	Lombardo	19	4	Soft	385
411	P17	Integer	Integer	13	11	1.18182	3	Production	Backed flake	1-25	Lateral back	Trapeze	Wavy	Hinged	flat	0	3-Orthogonal		Pisa	66	72 (27)	Radiolarite	50	41	39	70	1.2	1.2	Core	Polyhedron	angular	inner plan	fine/medium-grained	2	P_17	One	Long	3 - Exhausted	Perpendicular	flake, bladelet	Lombardo	19	4	Soft	385
410	P17	Fragmented	Distal	6	13	0.461538	1	Production	Flake	0		Linear	Rectilinear	Feather	flat	0	1-Unidirectional		Pisa	66	72 (27)	Radiolarite	50	41	39	70	1.2	1.2	Core	Polyhedron	angular	inner plan	fine/medium-grained	2	P_17	One	Long	3 - Exhausted	Perpendicular	flake, bladelet	Lombardo	19	4	Soft	385
406	P17	Integer	Integer	12	10	1.2	2	Production	Flake	26-50	Lateral	Linear	Rectilinear	Feather	flat	0	1-Unidirectional		Pisa	66	72 (27)	Radiolarite	50	41	39	70	1.2	1.2	Core	Polyhedron	angular	inner plan	fine/medium-grained	2	P_17	One	Long	3 - Exhausted	Perpendicular	flake, bladelet	Lombardo	19	4	Soft	385
405	P17	Integer	Integer	10	15	0.666667	3	Production	Flake	0		Linear	Rectilinear	Feather	flat	0	1-Unidirectional		Pisa	66	72 (27)	Radiolarite	50	41	39	70	1.2	1.2	Core	Polyhedron	angular	inner plan	fine/medium-grained	2	P_17	One	Long	3 - Exhausted	Perpendicular	flake, bladelet	Lombardo	19	4	Soft	385
404	P17	Integer	Integer	6	12	0.5	2	Production	Backed flake	1-25	Lateral back	Trapeze	Wavy	Feather	flat	0	1-Unidirectional		Pisa	66	72 (27)	Radiolarite	50	41	39	70	1.2	1.2	Core	Polyhedron	angular	inner plan	fine/medium-grained	2	P_17	One	Long	3 - Exhausted	Perpendicular	flake, bladelet	Lombardo	19	4	Soft	385
446	P17	Integer	Integer	29	19	1.52632	3	Initialization	Flake	76-99	Semi-total	Linear	Rectilinear	Broken	flat	0	2-Bidirectional		Pisa	66	72 (27)	Radiolarite	50	41	39	70	1.2	1.2	Core	Polyhedron	angular	inner plan	fine/medium-grained	2	P_17	One	Long	3 - Exhausted	Perpendicular	flake, bladelet	Lombardo	19	4	Soft	385
457	P17	Integer	Integer	31	16	1.9375	6	Production	Flake	0		Irregular	Rectilinear	Feather	flat	0	4-Multidirectional		Pisa	66	72 (27)	Radiolarite	50	41	39	70	1.2	1.2	Core	Polyhedron	angular	inner plan	fine/medium-grained	2	P_17	One	Long	3 - Exhausted	Perpendicular	flake, bladelet	Lombardo	19	4	Soft	385
408	P17	Fragmented	Distal	11	7	1.57143	4	Production	Flake	26-50	Lateral	Triangular	Rectilinear	Hinged	flat	0	3-Orthogonal		Pisa	66	72 (27)	Radiolarite	50	41	39	70	1.2	1.2	Core	Polyhedron	angular	inner plan	fine/medium-grained	2	P_17	One	Long	3 - Exhausted	Perpendicular	flake, bladelet	Lombardo	19	4	Soft	385
403	P17	Integer	Integer	18	17	1.05882	3	Production	Backed flake	1-25	Lateral back	Trapeze	Twisted	Feather	flat	0	1-Unidirectional		Pisa	66	72 (27)	Radiolarite	50	41	39	70	1.2	1.2	Core	Polyhedron	angular	inner plan	fine/medium-grained	2	P_17	One	Long	3 - Exhausted	Perpendicular	flake, bladelet	Lombardo	19	4	Soft	385
418	p17	Integer	Integer	16	15	1.06667	3	Initialization	Flake	Total	Total	Linear	Wavy	Hinged	flat	0	Indet		Pisa	66	72 (27)	Radiolarite	50	41	39	70	1.2	1.2	Core	Polyhedron	angular	inner plan	fine/medium-grained	2	P_17	One	Long	3 - Exhausted	Perpendicular	flake, bladelet	Lombardo	19	4	Soft	385
462	P17	Fragmented	Meso-Distal	47	8	5.875	4	Production	Bladelet	51-75	Lateral	Triangular	Twisted	Plunging	flat	0	1-Unidirectional		Pisa	66	72 (27)	Radiolarite	50	41	39	70	1.2	1.2	Core	Polyhedron	angular	inner plan	fine/medium-grained	2	P_17	One	Long	3 - Exhausted	Perpendicular	flake, bladelet	Lombardo	19	4	Soft	385
461	P17	Integer	Integer	21	5	4.2	4	Production	Bladelet	0		Triangular	Rectilinear	Feather	flat	0	1-Unidirectional		Pisa	66	72 (27)	Radiolarite	50	41	39	70	1.2	1.2	Core	Polyhedron	angular	inner plan	fine/medium-grained	2	P_17	One	Long	3 - Exhausted	Perpendicular	flake, bladelet	Lombardo	19	4	Soft	385
460	P17	Integer	Integer	21	4	5.25	2	Initialization	Bladelet	76-99	Semi-total	Trapeze	Rectilinear	Broken	flat	0	1-Unidirectional		Pisa	66	72 (27)	Radiolarite	50	41	39	70	1.2	1.2	Core	Polyhedron	angular	inner plan	fine/medium-grained	2	P_17	One	Long	3 - Exhausted	Perpendicular	flake, bladelet	Lombardo	19	4	Soft	385
459	P17	Integer	Integer	20	6	3.33333	4	Production	Bladelet	0		Irregular	Rectilinear	Broken	flat	0	3-Orthogonal		Pisa	66	72 (27)	Radiolarite	50	41	39	70	1.2	1.2	Core	Polyhedron	angular	inner plan	fine/medium-grained	2	P_17	One	Long	3 - Exhausted	Perpendicular	flake, bladelet	Lombardo	19	4	Soft	385
458	P17	Integer	Integer	8	23	0.347826	3	Production	Flake	0		Linear	Wavy	Feather	flat	0	1-Unidirectional		Pisa	66	72 (27)	Radiolarite	50	41	39	70	1.2	1.2	Core	Polyhedron	angular	inner plan	fine/medium-grained	2	P_17	One	Long	3 - Exhausted	Perpendicular	flake, bladelet	Lombardo	19	4	Soft	385
455	P17	Integer	Integer	22	12	1.83333	3	Production	Flake	1-25	Proximal	Triangular	Rectilinear	Feather	flat	0	1-Unidirectional		Pisa	66	72 (27)	Radiolarite	50	41	39	70	1.2	1.2	Core	Polyhedron	angular	inner plan	fine/medium-grained	2	P_17	One	Long	3 - Exhausted	Perpendicular	flake, bladelet	Lombardo	19	4	Soft	385
456	P17	Integer	Integer	20	15	1.33333	6	Initialization	Flake	76-99	Semi-total	Irregular	Wavy	Feather	flat	0	1-Unidirectional		Pisa	66	72 (27)	Radiolarite	50	41	39	70	1.2	1.2	Core	Polyhedron	angular	inner plan	fine/medium-grained	2	P_17	One	Long	3 - Exhausted	Perpendicular	flake, bladelet	Lombardo	19	4	Soft	385
447	P17	Integer	Integer	17	22	0.772727	4	Production	Flake	1-25	Proximal	Trapeze	Rectilinear	Hinged	flat	0	1-Unidirectional		Pisa	66	72 (27)	Radiolarite	50	41	39	70	1.2	1.2	Core	Polyhedron	angular	inner plan	fine/medium-grained	2	P_17	One	Long	3 - Exhausted	Perpendicular	flake, bladelet	Lombardo	19	4	Soft	385
454	P17	Fragmented	Distal	17	18	0.944444	4	Production	Flake	0		Triangular	Rectilinear	Hinged	flat	0	2-Bidirectional		Pisa	66	72 (27)	Radiolarite	50	41	39	70	1.2	1.2	Core	Polyhedron	angular	inner plan	fine/medium-grained	2	P_17	One	Long	3 - Exhausted	Perpendicular	flake, bladelet	Lombardo	19	4	Soft	385
453	P17	Fragmented	Meso-Proximal	24	16	1.5	3	Production	Flake	0		Trapeze	Rectilinear	Plunging	flat	0	2-Bidirectional		Pisa	66	72 (27)	Radiolarite	50	41	39	70	1.2	1.2	Core	Polyhedron	angular	inner plan	fine/medium-grained	2	P_17	One	Long	3 - Exhausted	Perpendicular	flake, bladelet	Lombardo	19	4	Soft	385
452	P17	Integer	Integer	31	21	1.47619	3	Production	Flake	0		Trapeze	Wavy	Plunging	flat	0	2-Bidirectional		Pisa	66	72 (27)	Radiolarite	50	41	39	70	1.2	1.2	Core	Polyhedron	angular	inner plan	fine/medium-grained	2	P_17	One	Long	3 - Exhausted	Perpendicular	flake, bladelet	Lombardo	19	4	Soft	385
451	P17	Integer	Integer	21	20	1.05	3	Production	Flake	0		Linear	Rectilinear	Feather	flat	0	1-Unidirectional		Pisa	66	72 (27)	Radiolarite	50	41	39	70	1.2	1.2	Core	Polyhedron	angular	inner plan	fine/medium-grained	2	P_17	One	Long	3 - Exhausted	Perpendicular	flake, bladelet	Lombardo	19	4	Soft	385
450	P17	Integer	Integer	25	12	2.08333	7	Production	Bladelet	0		Trapeze	Rectilinear	Plunging	flat	0	4-Multidirectional		Pisa	66	72 (27)	Radiolarite	50	41	39	70	1.2	1.2	Core	Polyhedron	angular	inner plan	fine/medium-grained	2	P_17	One	Long	3 - Exhausted	Perpendicular	flake, bladelet	Lombardo	19	4	Soft	385
449	P17	Integer	Integer	21	17	1.23529	5	Production	Flake	26-50	Proximal	Trapeze	Twisted	Hinged	flat	0	1-Unidirectional		Pisa	66	72 (27)	Radiolarite	50	41	39	70	1.2	1.2	Core	Polyhedron	angular	inner plan	fine/medium-grained	2	P_17	One	Long	3 - Exhausted	Perpendicular	flake, bladelet	Lombardo	19	4	Soft	385
448	P17	Integer	Integer	23	17	1.35294	4	Production	Flake	0		Trapeze	Rectilinear	Broken	flat	0	2-Bidirectional		Pisa	66	72 (27)	Radiolarite	50	41	39	70	1.2	1.2	Core	Polyhedron	angular	inner plan	fine/medium-grained	2	P_17	One	Long	3 - Exhausted	Perpendicular	flake, bladelet	Lombardo	19	4	Soft	385
407	P17	Integer	Integer	15	8	1.875	4	Production	Flake	0		Triangular	Rectilinear	Feather	flat	0	2-Bidirectional		Pisa	66	72 (27)	Radiolarite	50	41	39	70	1.2	1.2	Core	Polyhedron	angular	inner plan	fine/medium-grained	2	P_17	One	Long	3 - Exhausted	Perpendicular	flake, bladelet	Lombardo	19	4	Soft	385
424	P17	Fragmented	Meso-Distal	15	9	1.66667	4	Production	Flake	0		Triangular	Twisted	Plunging	flat	0	1-Unidirectional		Pisa	66	72 (27)	Radiolarite	50	41	39	70	1.2	1.2	Core	Polyhedron	angular	inner plan	fine/medium-grained	2	P_17	One	Long	3 - Exhausted	Perpendicular	flake, bladelet	Lombardo	19	4	Soft	385
432	P17	Integer	Integer	13	9	1.44444	1	Production	Backed flake	1-25	Lateral back	Linear	Rectilinear	Feather	flat	0	1-Unidirectional		Pisa	66	72 (27)	Radiolarite	50	41	39	70	1.2	1.2	Core	Polyhedron	angular	inner plan	fine/medium-grained	2	P_17	One	Long	3 - Exhausted	Perpendicular	flake, bladelet	Lombardo	19	4	Soft	385
431	P17	Fragmented	Meso-Distal	13	10	1.3	1	Production	Flake	0		Linear	Rectilinear	Feather	flat	0	2-Bidirectional		Pisa	66	72 (27)	Radiolarite	50	41	39	70	1.2	1.2	Core	Polyhedron	angular	inner plan	fine/medium-grained	2	P_17	One	Long	3 - Exhausted	Perpendicular	flake, bladelet	Lombardo	19	4	Soft	385
430	P17	Fragmented	Proximal	12	11	1.09091	1	Production	Flake	0		Linear	Rectilinear	Broken	flat	0	1-Unidirectional		Pisa	66	72 (27)	Radiolarite	50	41	39	70	1.2	1.2	Core	Polyhedron	angular	inner plan	fine/medium-grained	2	P_17	One	Long	3 - Exhausted	Perpendicular	flake, bladelet	Lombardo	19	4	Soft	385
429	P17	Integer	Integer	12	8	1.5	3	Production	Flake	76-99	Proximal	Linear	Rectilinear	Broken	flat	0	2-Bidirectional		Pisa	66	72 (27)	Radiolarite	50	41	39	70	1.2	1.2	Core	Polyhedron	angular	inner plan	fine/medium-grained	2	P_17	One	Long	3 - Exhausted	Perpendicular	flake, bladelet	Lombardo	19	4	Soft	385
428	P17	Fragmented	Composite	13	7	1.85714	5	Production	Chunk	0		Trapeze			poligonal	0	4-Multidirectional		Pisa	66	72 (27)	Radiolarite	50	41	39	70	1.2	1.2	Core	Polyhedron	angular	inner plan	fine/medium-grained	2	P_17	One	Long	3 - Exhausted	Perpendicular	flake, bladelet	Lombardo	19	4	Soft	385
427	P17	Integer	Integer	14	6	2.33333	2	Production	Bladelet	26-50		Linear	Twisted	Feather	flat	0	1-Unidirectional		Pisa	66	72 (27)	Radiolarite	50	41	39	70	1.2	1.2	Core	Polyhedron	angular	inner plan	fine/medium-grained	2	P_17	One	Long	3 - Exhausted	Perpendicular	flake, bladelet	Lombardo	19	4	Soft	385
433	P17	Integer	Integer	13	6	2.16667	2	Production	Bladelet	0		Triangular	Rectilinear	Feather	flat	0	1-Unidirectional		Pisa	66	72 (27)	Radiolarite	50	41	39	70	1.2	1.2	Core	Polyhedron	angular	inner plan	fine/medium-grained	2	P_17	One	Long	3 - Exhausted	Perpendicular	flake, bladelet	Lombardo	19	4	Soft	385
425	P17	Fragmented	Meso-Proximal	14	15	0.933333	2	Production	Flake	0		Linear	Rectilinear	Broken	flat	0	2-Bidirectional		Pisa	66	72 (27)	Radiolarite	50	41	39	70	1.2	1.2	Core	Polyhedron	angular	inner plan	fine/medium-grained	2	P_17	One	Long	3 - Exhausted	Perpendicular	flake, bladelet	Lombardo	19	4	Soft	385
420	P17	Fragmented	Distal	10	8	1.25	2	Initialization	Flake	76-99	Semi-total	Half circles	Rectilinear	Feather	flat	0	1-Unidirectional		Pisa	66	72 (27)	Radiolarite	50	41	39	70	1.2	1.2	Core	Polyhedron	angular	inner plan	fine/medium-grained	2	P_17	One	Long	3 - Exhausted	Perpendicular	flake, bladelet	Lombardo	19	4	Soft	385
423	P17	Integer	Integer	12	9	1.33333	1	Initialization	Flake	76-99	Semi-total	Linear	Rectilinear	Feather	flat	0	1-Unidirectional		Pisa	66	72 (27)	Radiolarite	50	41	39	70	1.2	1.2	Core	Polyhedron	angular	inner plan	fine/medium-grained	2	P_17	One	Long	3 - Exhausted	Perpendicular	flake, bladelet	Lombardo	19	4	Soft	385
422	P17	Integer	Integer	13	8	1.625	1	Initialization	Flake	Total	Transversal	Linear	Rectilinear	Feather	flat	0	Indet		Pisa	66	72 (27)	Radiolarite	50	41	39	70	1.2	1.2	Core	Polyhedron	angular	inner plan	fine/medium-grained	2	P_17	One	Long	3 - Exhausted	Perpendicular	flake, bladelet	Lombardo	19	4	Soft	385
421	P17	Integer	Integer	12	8	1.5	2	Production	Flake	0		Linear	Wavy	Hinged	flat	0	1-Unidirectional		Pisa	66	72 (27)	Radiolarite	50	41	39	70	1.2	1.2	Core	Polyhedron	angular	inner plan	fine/medium-grained	2	P_17	One	Long	3 - Exhausted	Perpendicular	flake, bladelet	Lombardo	19	4	Soft	385
402	P17	Fragmented	Meso-Proximal	12	6	2	1	Production	Backed flake	1-25	Lateral back	Linear	Rectilinear	Broken	flat	0	1-Unidirectional		Pisa	66	72 (27)	Radiolarite	50	41	39	70	1.2	1.2	Core	Polyhedron	angular	inner plan	fine/medium-grained	2	P_17	One	Long	3 - Exhausted	Perpendicular	flake, bladelet	Lombardo	19	4	Soft	385
419	P17	Integer	Integer	13	9	1.44444	4	Production	Flake	0		Triangular	Wavy	Hinged	triangular prism	0	1-Unidirectional		Pisa	66	72 (27)	Radiolarite	50	41	39	70	1.2	1.2	Core	Polyhedron	angular	inner plan	fine/medium-grained	2	P_17	One	Long	3 - Exhausted	Perpendicular	flake, bladelet	Lombardo	19	4	Soft	385
409	P17	Integer	Integer	13	13	1	2	Production	Flake	0		Linear	Rectilinear	Hinged	flat	0	1-Unidirectional		Pisa	66	72 (27)	Radiolarite	50	41	39	70	1.2	1.2	Core	Polyhedron	angular	inner plan	fine/medium-grained	2	P_17	One	Long	3 - Exhausted	Perpendicular	flake, bladelet	Lombardo	19	4	Soft	385
426	P17	Integer	Integer	12	8	1.5	3	Production	Flake	0		Linear	Wavy	Feather	flat	0	2-Bidirectional		Pisa	66	72 (27)	Radiolarite	50	41	39	70	1.2	1.2	Core	Polyhedron	angular	inner plan	fine/medium-grained	2	P_17	One	Long	3 - Exhausted	Perpendicular	flake, bladelet	Lombardo	19	4	Soft	385
443	P17	Integer	Integer	28	16	1.75	4	Production	Flake	26-50	Lateral	Trapeze	Twisted	Plunging	flat	0	2-Bidirectional		Pisa	66	72 (27)	Radiolarite	50	41	39	70	1.2	1.2	Core	Polyhedron	angular	inner plan	fine/medium-grained	2	P_17	One	Long	3 - Exhausted	Perpendicular	flake, bladelet	Lombardo	19	4	Soft	385
434	P17	Integer	Integer	13	5	2.6	2	Production	Bladelet	0		Triangular	Rectilinear	Broken	flat	0	2-Bidirectional		Pisa	66	72 (27)	Radiolarite	50	41	39	70	1.2	1.2	Core	Polyhedron	angular	inner plan	fine/medium-grained	2	P_17	One	Long	3 - Exhausted	Perpendicular	flake, bladelet	Lombardo	19	4	Soft	385
401	P17	Integer	Integer	11	10	1.1	3	Production	Backed flake	1-25	Lateral back	Triangular	Rectilinear	Feather	flat	0	1-Unidirectional		Pisa	66	72 (27)	Radiolarite	50	41	39	70	1.2	1.2	Core	Polyhedron	angular	inner plan	fine/medium-grained	2	P_17	One	Long	3 - Exhausted	Perpendicular	flake, bladelet	Lombardo	19	4	Soft	385
400	P17	Fragmented	Meso-Distal	17	9	1.88889	7	Production	Backed flake	26-50	Lateral back	Triangular	Twisted	Plunging	flat	0	2-Bidirectional		Pisa	66	72 (27)	Radiolarite	50	41	39	70	1.2	1.2	Core	Polyhedron	angular	inner plan	fine/medium-grained	2	P_17	One	Long	3 - Exhausted	Perpendicular	flake, bladelet	Lombardo	19	4	Soft	385
399	P17	Integer	Integer	13	8	1.625	3	Production	Flake	0		Trapeze	Rectilinear	Hinged	flat	0	2-Bidirectional		Pisa	66	72 (27)	Radiolarite	50	41	39	70	1.2	1.2	Core	Polyhedron	angular	inner plan	fine/medium-grained	2	P_17	One	Long	3 - Exhausted	Perpendicular	flake, bladelet	Lombardo	19	4	Soft	385
398	P17	Integer	Integer	26	15	1.73333	10	Final	Flake	26-50	Lateral	Trapeze	Rectilinear	Plunging	flatparalelepiped	0	2-Bidirectional		Pisa	66	72 (27)	Radiolarite	50	41	39	70	1.2	1.2	Core	Polyhedron	angular	inner plan	fine/medium-grained	2	P_17	One	Long	3 - Exhausted	Perpendicular	flake, bladelet	Lombardo	19	4	Soft	385
444	P17	Integer	Integer	26	14	1.85714	3	Production	Flake	0		Triangular	Wavy	Feather	flat	0	1-Unidirectional		Pisa	66	72 (27)	Radiolarite	50	41	39	70	1.2	1.2	Core	Polyhedron	angular	inner plan	fine/medium-grained	2	P_17	One	Long	3 - Exhausted	Perpendicular	flake, bladelet	Lombardo	19	4	Soft	385
442	P17	Fragmented	Composite	24	14	1.71429	6	Production	Chunk	1-25	Lateral	Irregular			poligonal	0	4-Multidirectional		Pisa	66	72 (27)	Radiolarite	50	41	39	70	1.2	1.2	Core	Polyhedron	angular	inner plan	fine/medium-grained	2	P_17	One	Long	3 - Exhausted	Perpendicular	flake, bladelet	Lombardo	19	4	Soft	385
441	P17	Integer	Integer	30	23	1.30435	4	Production	Flake	1-25	Transversal	Trapeze	Wavy	Plunging	flat	0	4-Multidirectional		Pisa	66	72 (27)	Radiolarite	50	41	39	70	1.2	1.2	Core	Polyhedron	angular	inner plan	fine/medium-grained	2	P_17	One	Long	3 - Exhausted	Perpendicular	flake, bladelet	Lombardo	19	4	Soft	385
440	P17	Integer	Integer	22	16	1.375	6	Production	Flake	0		Irregular	Twisted	Plunging	flat	0	2-Bidirectional		Pisa	66	72 (27)	Radiolarite	50	41	39	70	1.2	1.2	Core	Polyhedron	angular	inner plan	fine/medium-grained	2	P_17	One	Long	3 - Exhausted	Perpendicular	flake, bladelet	Lombardo	19	4	Soft	385
439	P17	Fragmented	Meso-Distal	13	5	2.6	2	Production	Bladelet	0		Linear	Twisted	Feather	flat	0	1-Unidirectional		Pisa	66	72 (27)	Radiolarite	50	41	39	70	1.2	1.2	Core	Polyhedron	angular	inner plan	fine/medium-grained	2	P_17	One	Long	3 - Exhausted	Perpendicular	flake, bladelet	Lombardo	19	4	Soft	385
438	P17	Integer	Integer	5	14	0.357143	2	Production	Flake	76-99	Transversal	Linear	Rectilinear	Feather	flat	0	1-Unidirectional		Pisa	66	72 (27)	Radiolarite	50	41	39	70	1.2	1.2	Core	Polyhedron	angular	inner plan	fine/medium-grained	2	P_17	One	Long	3 - Exhausted	Perpendicular	flake, bladelet	Lombardo	19	4	Soft	385
437	P17	Fragmented	Mesial	14	3	4.66667	1	Production	Bladelet	0		Triangular	Rectilinear	Broken	flat	0	1-Unidirectional		Pisa	66	72 (27)	Radiolarite	50	41	39	70	1.2	1.2	Core	Polyhedron	angular	inner plan	fine/medium-grained	2	P_17	One	Long	3 - Exhausted	Perpendicular	flake, bladelet	Lombardo	19	4	Soft	385
436	P17	Integer	Integer	19	6	3.16667	2	Production	Bladelet	0		Triangular	Rectilinear	Feather	flat	0	1-Unidirectional		Pisa	66	72 (27)	Radiolarite	50	41	39	70	1.2	1.2	Core	Polyhedron	angular	inner plan	fine/medium-grained	2	P_17	One	Long	3 - Exhausted	Perpendicular	flake, bladelet	Lombardo	19	4	Soft	385
435	P17	Integer	Integer	17	7	2.42857	4	Production	Bladelet	51-75	Lateral back	Triangular	Twisted	Plunging	flat	0	1-Unidirectional		Pisa	66	72 (27)	Radiolarite	50	41	39	70	1.2	1.2	Core	Polyhedron	angular	inner plan	fine/medium-grained	2	P_17	One	Long	3 - Exhausted	Perpendicular	flake, bladelet	Lombardo	19	4	Soft	385
397	P17	Integer	Integer	24	26	0.923077	6	Final	Core	0		Trapeze			flatparalelepiped	3	4-Multidirectional		Pisa	66	72 (27)	Radiolarite	50	41	39	70	1.2	1.2	Core	Polyhedron	angular	inner plan	fine/medium-grained	2	P_17	One	Long	3 - Exhausted	Perpendicular	flake, bladelet	Lombardo	19	4	Soft	385
3008	P18	Integer	Integer	34	16	2.125	5	Production	Blade	0		Trapeze	Wavy	Feather	flat	0	1-Unidirectional		Pisa	11	3	Radiolarite	41	24	24	36	1.7	1.7	Pebble	Flat-convex	angular	inner plan	fine/medium-grained	1	P_18	One	Long	2 - Medium	Perpendicular	bladelet	Conforti	1	1	Hard	403
3006	P18	Integer	Integer	36	10	3.6	5	Initialization	Bladelet	51-75	Semi-total	Triangular	Twisted	Feather	flat	0	1-Unidirectional		Pisa	11	3	Radiolarite	41	24	24	36	1.7	1.7	Pebble	Flat-convex	angular	inner plan	fine/medium-grained	1	P_18	One	Long	2 - Medium	Perpendicular	bladelet	Conforti	1	1	Hard	403
3010	P18	Integer	Integer	34	23	1.47826	11	Production	Core	51-75	Semi-total				flatparalelepiped	1	1-Unidirectional		Pisa	11	3	Radiolarite	41	24	24	36	1.7	1.7	Pebble	Flat-convex	angular	inner plan	fine/medium-grained	1	P_18	One	Long	2 - Medium	Perpendicular	bladelet	Conforti	1	1	Hard	403
3176	P18	Integer	Integer	6	10	0.6	2	Production	Flake	0		Triangular	Rectilinear	Hinged	flat	0	2-Bidirectional		Pisa	11	3	Radiolarite	41	24	24	36	1.7	1.7	Pebble	Flat-convex	angular	inner plan	fine/medium-grained	1	P_18	One	Long	2 - Medium	Perpendicular	bladelet	Conforti	1	1	Hard	403
3007	P18	Integer	Integer	27	10	2.7	4	Production	Bladelet	26-50	Lateral	Triangular	Rectilinear	Feather	flat	0	1-Unidirectional		Pisa	11	3	Radiolarite	41	24	24	36	1.7	1.7	Pebble	Flat-convex	angular	inner plan	fine/medium-grained	1	P_18	One	Long	2 - Medium	Perpendicular	bladelet	Conforti	1	1	Hard	403
3004	P18	Fragmented	Meso-Proximal	27	14	1.92857	3	Production	Blade	26-50	Lateral	Irregular	Twisted	Broken	flat	0	1-Unidirectional		Pisa	11	3	Radiolarite	41	24	24	36	1.7	1.7	Pebble	Flat-convex	angular	inner plan	fine/medium-grained	1	P_18	One	Long	2 - Medium	Perpendicular	bladelet	Conforti	1	1	Hard	403
3003	P18	Fragmented	Meso-Distal	27	13	2.07692	5	Initialization	Blade	Total	Total	Irregular	Concave	Plunging	flat	0	Indet		Pisa	11	3	Radiolarite	41	24	24	36	1.7	1.7	Pebble	Flat-convex	angular	inner plan	fine/medium-grained	1	P_18	One	Long	2 - Medium	Perpendicular	bladelet	Conforti	1	1	Hard	403
3002	P18	Fragmented	Proximal	17	16	1.0625	6	Initialization	Blade	51-75	Semi-total	Irregular	Wavy	Broken	flat	0	1-Unidirectional		Pisa	11	3	Radiolarite	41	24	24	36	1.7	1.7	Pebble	Flat-convex	angular	inner plan	fine/medium-grained	1	P_18	One	Long	2 - Medium	Perpendicular	bladelet	Conforti	1	1	Hard	403
3009	P18	Integer	Integer	38	15	2.53333	5	Production	Blade	51-75	Semi-total	Irregular	Wavy	Plunging	flat	0	1-Unidirectional		Pisa	11	3	Radiolarite	41	24	24	36	1.7	1.7	Pebble	Flat-convex	angular	inner plan	fine/medium-grained	1	P_18	One	Long	2 - Medium	Perpendicular	bladelet	Conforti	1	1	Hard	403
3001	P18	Fragmented	Meso-Distal	10	7	1.42857	2	Production	Flake	0		Irregular	Twisted	Feather	flat	0	1-Unidirectional		Pisa	11	3	Radiolarite	41	24	24	36	1.7	1.7	Pebble	Flat-convex	angular	inner plan	fine/medium-grained	1	P_18	One	Long	2 - Medium	Perpendicular	bladelet	Conforti	1	1	Hard	403
3005	P18	Fragmented	Mesial	4	13	0.307692	2	Production	Blade	0		Triangular	Rectilinear	Broken	flat	0	1-Unidirectional		Pisa	11	3	Radiolarite	41	24	24	36	1.7	1.7	Pebble	Flat-convex	angular	inner plan	fine/medium-grained	1	P_18	One	Long	2 - Medium	Perpendicular	bladelet	Conforti	1	1	Hard	403
3029	P19	Fragmented	Lateral	14	3	4.66667	1	Production	Flake	0		Irregular	Rectilinear	Broken	poligonal	0	Indet		Pisa	23	4	Radiolarite	44	23	26	46	1.9	1.6	Pebble	Polyhedron	angular	inner plan	medium-grained	1	P_19	One	Long	3 - Exhausted	Perpendicular	flake, bladelet	Conforti	1	1	Hard	403
3024	P19	Fragmented	Lateral	10	3	3.33333	1	Production	Flake	0		Irregular	Twisted	Hinged	flat	0	2-Bidirectional		Pisa	23	4	Radiolarite	44	23	26	46	1.9	1.6	Pebble	Polyhedron	angular	inner plan	medium-grained	1	P_19	One	Long	3 - Exhausted	Perpendicular	flake, bladelet	Conforti	1	1	Hard	403
3025	P19	Fragmented	Lateral	11	5	2.2	1	Initialization	Flake	Total	Total	Irregular	Rectilinear	Feather	flat	0	2-Bidirectional		Pisa	23	4	Radiolarite	44	23	26	46	1.9	1.6	Pebble	Polyhedron	angular	inner plan	medium-grained	1	P_19	One	Long	3 - Exhausted	Perpendicular	flake, bladelet	Conforti	1	1	Hard	403
3026	P19	Integer	Integer	10	7	1.42857	1	Production	Flake	0		Linear	Rectilinear	Hinged	flat	0	1-Unidirectional		Pisa	23	4	Radiolarite	44	23	26	46	1.9	1.6	Pebble	Polyhedron	angular	inner plan	medium-grained	1	P_19	One	Long	3 - Exhausted	Perpendicular	flake, bladelet	Conforti	1	1	Hard	403
3023	P19	Fragmented	Lateral	12	10	1.2	2	Production	Flake	0		Irregular	Rectilinear	Hinged	flat	0	2-Bidirectional		Pisa	23	4	Radiolarite	44	23	26	46	1.9	1.6	Pebble	Polyhedron	angular	inner plan	medium-grained	1	P_19	One	Long	3 - Exhausted	Perpendicular	flake, bladelet	Conforti	1	1	Hard	403
3028	P19	Fragmented	Lateral	11	4	2.75	2	Initialization	Flake	Total	Total	Irregular	Twisted	Broken	poligonal	0	Indet		Pisa	23	4	Radiolarite	44	23	26	46	1.9	1.6	Pebble	Polyhedron	angular	inner plan	medium-grained	1	P_19	One	Long	3 - Exhausted	Perpendicular	flake, bladelet	Conforti	1	1	Hard	403
3018	P19	Fragmented	Lateral	19	11	1.72727	4	Production	Flake	0		Trapeze	Rectilinear	Feather	flat	0	1-Unidirectional		Pisa	23	4	Radiolarite	44	23	26	46	1.9	1.6	Pebble	Polyhedron	angular	inner plan	medium-grained	1	P_19	One	Long	3 - Exhausted	Perpendicular	flake, bladelet	Conforti	1	1	Hard	403
3030	P19	Fragmented	Lateral	12	5	2.4	2	Production	Chunk	0		Irregular	Rectilinear	Broken	flat	0	2-Bidirectional		Pisa	23	4	Radiolarite	44	23	26	46	1.9	1.6	Pebble	Polyhedron	angular	inner plan	medium-grained	1	P_19	One	Long	3 - Exhausted	Perpendicular	flake, bladelet	Conforti	1	1	Hard	403
3031	P19	Integer	Integer	10	2	5	1	Production	Bladelet	0		Triangular	Rectilinear	Hinged	flat	0	1-Unidirectional		Pisa	23	4	Radiolarite	44	23	26	46	1.9	1.6	Pebble	Polyhedron	angular	inner plan	medium-grained	1	P_19	One	Long	3 - Exhausted	Perpendicular	flake, bladelet	Conforti	1	1	Hard	403
3027	P19	Fragmented	Mesial	10	8	1.25	2	Production	Bladelet	0		Triangular	Rectilinear	Broken	flat	0	1-Unidirectional		Pisa	23	4	Radiolarite	44	23	26	46	1.9	1.6	Pebble	Polyhedron	angular	inner plan	medium-grained	1	P_19	One	Long	3 - Exhausted	Perpendicular	flake, bladelet	Conforti	1	1	Hard	403
3022	P19	Integer	Integer	14	9	1.55556	2	Production	Backed flake	1-25	Lateral back	Irregular	Rectilinear	Hinged	flat	0	1-Unidirectional		Pisa	23	4	Radiolarite	44	23	26	46	1.9	1.6	Pebble	Polyhedron	angular	inner plan	medium-grained	1	P_19	One	Long	3 - Exhausted	Perpendicular	flake, bladelet	Conforti	1	1	Hard	403
3021	P19	Integer	Integer	11	11	1	4	Production	Flake	26-50	Proximal	Irregular	Rectilinear	Feather	flat	0	1-Unidirectional		Pisa	23	4	Radiolarite	44	23	26	46	1.9	1.6	Pebble	Polyhedron	angular	inner plan	medium-grained	1	P_19	One	Long	3 - Exhausted	Perpendicular	flake, bladelet	Conforti	1	1	Hard	403
3019	P19	Fragmented	Lateral	18	10	1.8	4	Production	Flake	0		Irregular	Rectilinear	Hinged	flat	0	1-Unidirectional		Pisa	23	4	Radiolarite	44	23	26	46	1.9	1.6	Pebble	Polyhedron	angular	inner plan	medium-grained	1	P_19	One	Long	3 - Exhausted	Perpendicular	flake, bladelet	Conforti	1	1	Hard	403
3017	P19	Fragmented	Lateral	13	7	1.85714	2	Production	Bladelet	0		Irregular	Wavy	Hinged	flat	0	1-Unidirectional		Pisa	23	4	Radiolarite	44	23	26	46	1.9	1.6	Pebble	Polyhedron	angular	inner plan	medium-grained	1	P_19	One	Long	3 - Exhausted	Perpendicular	flake, bladelet	Conforti	1	1	Hard	403
3016	P19	Fragmented	Meso-Distal	13	18	0.722222	2	Initialization	Flake	76-99	Semi-total	Linear	Rectilinear	Hinged	flat	0	1-Unidirectional		Pisa	23	4	Radiolarite	44	23	26	46	1.9	1.6	Pebble	Polyhedron	angular	inner plan	medium-grained	1	P_19	One	Long	3 - Exhausted	Perpendicular	flake, bladelet	Conforti	1	1	Hard	403
3015	P19	Fragmented	Meso-Proximal	14	14	1	3	Initialization	Flake	76-99	Semi-total	Linear	Rectilinear	Broken	flat	0	1-Unidirectional		Pisa	23	4	Radiolarite	44	23	26	46	1.9	1.6	Pebble	Polyhedron	angular	inner plan	medium-grained	1	P_19	One	Long	3 - Exhausted	Perpendicular	flake, bladelet	Conforti	1	1	Hard	403
3014	P19	Fragmented	Meso-Proximal	23	11	2.09091	4	Production	Bladelet	26-50	Proximal	Irregular	Rectilinear	Broken	flat	0	2-Bidirectional		Pisa	23	4	Radiolarite	44	23	26	46	1.9	1.6	Pebble	Polyhedron	angular	inner plan	medium-grained	1	P_19	One	Long	3 - Exhausted	Perpendicular	flake, bladelet	Conforti	1	1	Hard	403
3012	P19	Integer	Integer	39	22	1.77273	13	Initialization	Flake	76-99	Semi-total	Trapeze	Wavy	Plunging	flatparalelepiped		2-Bidirectional		Pisa	23	4	Radiolarite	44	23	26	46	1.9	1.6	Pebble	Polyhedron	angular	inner plan	medium-grained	1	P_19	One	Long	3 - Exhausted	Perpendicular	flake, bladelet	Conforti	1	1	Hard	403
3032	P19	Integer	Integer	28	19	1.47368	15	Production	Core	26-50	Semi-total				flatparalelepiped	3	2-Bidirectional		Pisa	23	4	Radiolarite	44	23	26	46	1.9	1.6	Pebble	Polyhedron	angular	inner plan	medium-grained	1	P_19	One	Long	3 - Exhausted	Perpendicular	flake, bladelet	Conforti	1	1	Hard	403
3013	P19	Integer	Integer	23	19	1.21053	3	Production	Flake	0		Triangular	Rectilinear	Hinged	flat	0	Indet		Pisa	23	4	Radiolarite	44	23	26	46	1.9	1.6	Pebble	Polyhedron	angular	inner plan	medium-grained	1	P_19	One	Long	3 - Exhausted	Perpendicular	flake, bladelet	Conforti	1	1	Hard	403
3020	P19	Integer	Integer	15	10	1.5	6	Production	Flake	0		Irregular	Convex	Feather	poligonal	0	1-Unidirectional		Pisa	23	4	Radiolarite	44	23	26	46	1.9	1.6	Pebble	Polyhedron	angular	inner plan	medium-grained	1	P_19	One	Long	3 - Exhausted	Perpendicular	flake, bladelet	Conforti	1	1	Hard	403
3011	P19	Integer	Integer	30	14	2.14286	3	Initialization	Blade	76-99	Semi-total	Irregular	Rectilinear	Feather	flat	0	Indet		Pisa	23	4	Radiolarite	44	23	26	46	1.9	1.6	Pebble	Polyhedron	angular	inner plan	medium-grained	1	P_19	One	Long	3 - Exhausted	Perpendicular	flake, bladelet	Conforti	1	1	Hard	403
3177	P19	Integer	Integer	10	9	1.11111	4	Production	Flake	26-50	Lateral	Triangular	Rectilinear	Hinged	flat	0	1-Unidirectional		Pisa	23	4	Radiolarite	44	23	26	46	1.9	1.6	Pebble	Polyhedron	angular	inner plan	medium-grained	1	P_19	One	Long	3 - Exhausted	Perpendicular	flake, bladelet	Conforti	1	1	Hard	403
43	P2	Integer	Integer	23	11	2.09091	7	Final	Flake	0		Trapeze	Rectilinear	Plunging	flatparalelepiped	0	2-Bidirectional		Pisa	15	74	Radiolarite	32	23	12	17	1.3	2.6	Pebble	Polyhedron	angular	inner plan	fine/medium-grained	0	P_2	One	Long	3 - Exhausted	Perpendicular	flake, bladelet	Lombardo	22	5	Hard	797
57	P2	Fragmented	Meso-Distal	13	4	3.25	1	Production	Bladelet	0		Trapeze	Rectilinear	Feather	flat	0	2-Bidirectional		Pisa	15	74	Radiolarite	32	23	12	17	1.3	2.6	Pebble	Polyhedron	angular	inner plan	fine/medium-grained	0	P_2	One	Long	3 - Exhausted	Perpendicular	flake, bladelet	Lombardo	22	5	Hard	797
56	P2	Integer	Integer	15	5	3	3	Initialization	Bladelet	26-50	Proximal	Triangular	Rectilinear	Feather	flat	0	1-Unidirectional		Pisa	15	74	Radiolarite	32	23	12	17	1.3	2.6	Pebble	Polyhedron	angular	inner plan	fine/medium-grained	0	P_2	One	Long	3 - Exhausted	Perpendicular	flake, bladelet	Lombardo	22	5	Hard	797
54	P2	Integer	Integer	25	9	2.77778	7	Initialization	Bladelet	Total	Total	Triangular	Twisted	Hinged	triangular prism	0	2-Bidirectional		Pisa	15	74	Radiolarite	32	23	12	17	1.3	2.6	Pebble	Polyhedron	angular	inner plan	fine/medium-grained	0	P_2	One	Long	3 - Exhausted	Perpendicular	flake, bladelet	Lombardo	22	5	Hard	797
53	P2	Fragmented	Composite	13	9	1.44444	5	Production	Chunk	Total	Total	Trapeze	Wavy	Plunging	poligonal	0	Indet		Pisa	15	74	Radiolarite	32	23	12	17	1.3	2.6	Pebble	Polyhedron	angular	inner plan	fine/medium-grained	0	P_2	One	Long	3 - Exhausted	Perpendicular	flake, bladelet	Lombardo	22	5	Hard	797
52	P2	Fragmented	Composite	12	5	2.4	2	Production	Chunk	0		Linear	Rectilinear	Broken	flat	0	Indet		Pisa	15	74	Radiolarite	32	23	12	17	1.3	2.6	Pebble	Polyhedron	angular	inner plan	fine/medium-grained	0	P_2	One	Long	3 - Exhausted	Perpendicular	flake, bladelet	Lombardo	22	5	Hard	797
46	P2	Fragmented	Composite	14	9	1.55556	8	Production	Chunk	76-99	Semi-total	Triangular	Rectilinear	Broken	triangular prism	0	Indet		Pisa	15	74	Radiolarite	32	23	12	17	1.3	2.6	Pebble	Polyhedron	angular	inner plan	fine/medium-grained	0	P_2	One	Long	3 - Exhausted	Perpendicular	flake, bladelet	Lombardo	22	5	Hard	797
50	P2	Fragmented	Composite	12	5	2.4	4	Production	Chunk	0		Irregular	Rectilinear	Broken	Truncated pyramid/frustum	0	4-Multidirectional		Pisa	15	74	Radiolarite	32	23	12	17	1.3	2.6	Pebble	Polyhedron	angular	inner plan	fine/medium-grained	0	P_2	One	Long	3 - Exhausted	Perpendicular	flake, bladelet	Lombardo	22	5	Hard	797
49	P2	Fragmented	Composite	14	8	1.75	5	Initialization	Chunk	26-50	Lateral	Irregular	Rectilinear	Broken	triangular prism	0	1-Unidirectional		Pisa	15	74	Radiolarite	32	23	12	17	1.3	2.6	Pebble	Polyhedron	angular	inner plan	fine/medium-grained	0	P_2	One	Long	3 - Exhausted	Perpendicular	flake, bladelet	Lombardo	22	5	Hard	797
48	P2	Fragmented	Composite	14	7	2	6	Initialization	Chunk	1-25	Lateral back	Trapeze	Rectilinear	Broken	Truncated pyramid/frustum	0	Indet		Pisa	15	74	Radiolarite	32	23	12	17	1.3	2.6	Pebble	Polyhedron	angular	inner plan	fine/medium-grained	0	P_2	One	Long	3 - Exhausted	Perpendicular	flake, bladelet	Lombardo	22	5	Hard	797
44	P2	Integer	Integer	21	11	1.90909	7	Final	Flake	0		Trapeze	Rectilinear	Plunging	Truncated pyramid/frustum	0	2-Bidirectional		Pisa	15	74	Radiolarite	32	23	12	17	1.3	2.6	Pebble	Polyhedron	angular	inner plan	fine/medium-grained	0	P_2	One	Long	3 - Exhausted	Perpendicular	flake, bladelet	Lombardo	22	5	Hard	797
47	P2	Integer	Integer	10	8	1.25	3	Production	Flake	0		Linear	Rectilinear	Feather	flat	0	1-Unidirectional		Pisa	15	74	Radiolarite	32	23	12	17	1.3	2.6	Pebble	Polyhedron	angular	inner plan	fine/medium-grained	0	P_2	One	Long	3 - Exhausted	Perpendicular	flake, bladelet	Lombardo	22	5	Hard	797
51	P2	Integer	Integer	12	6	2	3	Production	Flake	0		Rectangular Trapeze	Twisted	Feather	Truncated pyramid/frustum	0	1-Unidirectional		Pisa	15	74	Radiolarite	32	23	12	17	1.3	2.6	Pebble	Polyhedron	angular	inner plan	fine/medium-grained	0	P_2	One	Long	3 - Exhausted	Perpendicular	flake, bladelet	Lombardo	22	5	Hard	797
45	P2	Fragmented	Composite	18	12	1.5	10	Production	Chunk	76-99	Semi-total	Irregular		Broken	poligonal	0	4-Multidirectional		Pisa	15	74	Radiolarite	32	23	12	17	1.3	2.6	Pebble	Polyhedron	angular	inner plan	fine/medium-grained	0	P_2	One	Long	3 - Exhausted	Perpendicular	flake, bladelet	Lombardo	22	5	Hard	797
55	P2	Integer	Integer	25	10	2.5	3	Production	Bladelet	0		Trapeze	Rectilinear	Feather	flat	0	2-Bidirectional		Pisa	15	74	Radiolarite	32	23	12	17	1.3	2.6	Pebble	Polyhedron	angular	inner plan	fine/medium-grained	0	P_2	One	Long	3 - Exhausted	Perpendicular	flake, bladelet	Lombardo	22	5	Hard	797
3052	P20	Fragmented	Meso-Proximal	16	12	1.33333	2	Production	Flake	0		Irregular	Rectilinear	Broken	flat	0	1-Unidirectional		Pisa	33	9	Radiolarite	50	50	31	70	1	1.6	Pebble	Flat-convex	angular	inner plan	fine/medium-grained	0	P_20	One	Long + Short	3 - Exhausted	Perpendicular	flake, bladelet	Conforti	1	1	Hard	403
3051	P20	Fragmented	Lateral	14	14	1	5	Initialization	Flake	Total	Total	Irregular	Rectilinear	Hinged	flat	0	Indet		Pisa	33	9	Radiolarite	50	50	31	70	1	1.6	Pebble	Flat-convex	angular	inner plan	fine/medium-grained	0	P_20	One	Long + Short	3 - Exhausted	Perpendicular	flake, bladelet	Conforti	1	1	Hard	403
3050	P20	Fragmented	Meso-Distal	12	4	3	1	Production	Bladelet	1-25	Mesial	Triangular	Rectilinear	Hinged	flat	0	5-Perpendicular		Pisa	33	9	Radiolarite	50	50	31	70	1	1.6	Pebble	Flat-convex	angular	inner plan	fine/medium-grained	0	P_20	One	Long + Short	3 - Exhausted	Perpendicular	flake, bladelet	Conforti	1	1	Hard	403
3049	P20	Fragmented	Meso-Distal	14	5	2.8	2	Production	Bladelet	0		Triangular	Rectilinear	Hinged	flat	0	1-Unidirectional		Pisa	33	9	Radiolarite	50	50	31	70	1	1.6	Pebble	Flat-convex	angular	inner plan	fine/medium-grained	0	P_20	One	Long + Short	3 - Exhausted	Perpendicular	flake, bladelet	Conforti	1	1	Hard	403
3047	P20	Fragmented	Proximal	9	13	0.692308	1	Production	Flake	1-25	Lateral	Trapeze	Rectilinear	Broken	flat	0	1-Unidirectional		Pisa	33	9	Radiolarite	50	50	31	70	1	1.6	Pebble	Flat-convex	angular	inner plan	fine/medium-grained	0	P_20	One	Long + Short	3 - Exhausted	Perpendicular	flake, bladelet	Conforti	1	1	Hard	403
3053	P20	Fragmented	Meso-Distal	15	11	1.36364	4	Initialization	Flake	51-75	Lateral	Triangular	Concave	Plunging	flat	0	2-Bidirectional		Pisa	33	9	Radiolarite	50	50	31	70	1	1.6	Pebble	Flat-convex	angular	inner plan	fine/medium-grained	0	P_20	One	Long + Short	3 - Exhausted	Perpendicular	flake, bladelet	Conforti	1	1	Hard	403
3061	P20	Integer	Integer	7	11	0.636364	1	Production	Flake	1-25	Lateral	Linear	Rectilinear	Hinged	flat	0	1-Unidirectional		Pisa	33	9	Radiolarite	50	50	31	70	1	1.6	Pebble	Flat-convex	angular	inner plan	fine/medium-grained	0	P_20	One	Long + Short	3 - Exhausted	Perpendicular	flake, bladelet	Conforti	1	1	Hard	403
3048	P20	Fragmented	Mesial	16	17	0.941176	1	Production	Flake	1-25	Lateral	Trapeze	Twisted	Broken	flat	0	1-Unidirectional		Pisa	33	9	Radiolarite	50	50	31	70	1	1.6	Pebble	Flat-convex	angular	inner plan	fine/medium-grained	0	P_20	One	Long + Short	3 - Exhausted	Perpendicular	flake, bladelet	Conforti	1	1	Hard	403
3054	P20	Integer	Integer	13	10	1.3	2	Production	Flake	0		Triangular	Rectilinear	Hinged	flat	0	1-Unidirectional		Pisa	33	9	Radiolarite	50	50	31	70	1	1.6	Pebble	Flat-convex	angular	inner plan	fine/medium-grained	0	P_20	One	Long + Short	3 - Exhausted	Perpendicular	flake, bladelet	Conforti	1	1	Hard	403
3055	P20	Fragmented	Mesial	9	11	0.818182	3	Production	Flake	0		Triangular	Rectilinear	Broken	flat	0	2-Bidirectional		Pisa	33	9	Radiolarite	50	50	31	70	1	1.6	Pebble	Flat-convex	angular	inner plan	fine/medium-grained	0	P_20	One	Long + Short	3 - Exhausted	Perpendicular	flake, bladelet	Conforti	1	1	Hard	403
3056	P20	Integer	Integer	14	9	1.55556	1	Production	Flake	0		Linear	Rectilinear	Feather	flat	0	5-Perpendicular		Pisa	33	9	Radiolarite	50	50	31	70	1	1.6	Pebble	Flat-convex	angular	inner plan	fine/medium-grained	0	P_20	One	Long + Short	3 - Exhausted	Perpendicular	flake, bladelet	Conforti	1	1	Hard	403
3057	P20	Fragmented	Meso-Proximal	9	10	0.9	0	Production	Flake	0		Linear	Rectilinear	Broken	flat	0	1-Unidirectional		Pisa	33	9	Radiolarite	50	50	31	70	1	1.6	Pebble	Flat-convex	angular	inner plan	fine/medium-grained	0	P_20	One	Long + Short	3 - Exhausted	Perpendicular	flake, bladelet	Conforti	1	1	Hard	403
3058	P20	Integer	Integer	12	9	1.33333	1	Production	Flake	0		Trapeze	Rectilinear	Feather	flat	0	1-Unidirectional		Pisa	33	9	Radiolarite	50	50	31	70	1	1.6	Pebble	Flat-convex	angular	inner plan	fine/medium-grained	0	P_20	One	Long + Short	3 - Exhausted	Perpendicular	flake, bladelet	Conforti	1	1	Hard	403
3045	P20	Fragmented	Meso-Proximal	33	31	1.06452	3	Initialization	Flake	76-99	Semi-total	Irregular	Rectilinear	Broken	flat	0	1-Unidirectional		Pisa	33	9	Radiolarite	50	50	31	70	1	1.6	Pebble	Flat-convex	angular	inner plan	fine/medium-grained	0	P_20	One	Long + Short	3 - Exhausted	Perpendicular	flake, bladelet	Conforti	1	1	Hard	403
3060	P20	Fragmented	Proximal	8	10	0.8	2	Production	Flake	1-25	Lateral	Linear	Convex	Broken	flat	0	1-Unidirectional		Pisa	33	9	Radiolarite	50	50	31	70	1	1.6	Pebble	Flat-convex	angular	inner plan	fine/medium-grained	0	P_20	One	Long + Short	3 - Exhausted	Perpendicular	flake, bladelet	Conforti	1	1	Hard	403
3044	P20	Integer	Integer	20	14	1.42857	2	Initialization	Flake	76-99	Semi-total	Irregular	Rectilinear	Feather	flat	0	1-Unidirectional		Pisa	33	9	Radiolarite	50	50	31	70	1	1.6	Pebble	Flat-convex	angular	inner plan	fine/medium-grained	0	P_20	One	Long + Short	3 - Exhausted	Perpendicular	flake, bladelet	Conforti	1	1	Hard	403
3059	P20	Fragmented	Mesial	8	10	0.8	0	Production	Flake	0		Linear	Rectilinear	Broken	flat	0	Indet		Pisa	33	9	Radiolarite	50	50	31	70	1	1.6	Pebble	Flat-convex	angular	inner plan	fine/medium-grained	0	P_20	One	Long + Short	3 - Exhausted	Perpendicular	flake, bladelet	Conforti	1	1	Hard	403
3033	P20	Integer	Integer	34	26	1.30769	8	Production	Flake	0		Irregular	Concave	Feather	flat	0	5-Perpendicular		Pisa	33	9	Radiolarite	50	50	31	70	1	1.6	Pebble	Flat-convex	angular	inner plan	fine/medium-grained	0	P_20	One	Long + Short	3 - Exhausted	Perpendicular	flake, bladelet	Conforti	1	1	Hard	403
3046	P20	Fragmented	Meso-Distal	13	17	0.764706	1	Initialization	Flake	Total	Total	Irregular	Concave	Plunging	flat	0	Indet		Pisa	33	9	Radiolarite	50	50	31	70	1	1.6	Pebble	Flat-convex	angular	inner plan	fine/medium-grained	0	P_20	One	Long + Short	3 - Exhausted	Perpendicular	flake, bladelet	Conforti	1	1	Hard	403
3062	P20	Fragmented	Meso-Distal	4	12	0.333333	0	Production	Flake	0		Linear	Rectilinear	Feather	flat	0	1-Unidirectional		Pisa	33	9	Radiolarite	50	50	31	70	1	1.6	Pebble	Flat-convex	angular	inner plan	fine/medium-grained	0	P_20	One	Long + Short	3 - Exhausted	Perpendicular	flake, bladelet	Conforti	1	1	Hard	403
3180	P20	Fragmented	Lateral	10	8	1.25	1	Production	Flake	0		Linear	Wavy	Hinged	flat	0	1-Unidirectional		Pisa	33	9	Radiolarite	50	50	31	70	1	1.6	Pebble	Flat-convex	angular	inner plan	fine/medium-grained	0	P_20	One	Long + Short	3 - Exhausted	Perpendicular	flake, bladelet	Conforti	1	1	Hard	403
3178	P20	Integer	Integer	11	7	1.57143	1	Production	Flake	0		Linear	Rectilinear	Feather	flat	0	5-Perpendicular		Pisa	33	9	Radiolarite	50	50	31	70	1	1.6	Pebble	Flat-convex	angular	inner plan	fine/medium-grained	0	P_20	One	Long + Short	3 - Exhausted	Perpendicular	flake, bladelet	Conforti	1	1	Hard	403
3034	P20	Integer	Integer	24	27	0.888889	9	Production	Flake	1-25	Proximal	Irregular	Rectilinear	Plunging	flat	0	5-Perpendicular		Pisa	33	9	Radiolarite	50	50	31	70	1	1.6	Pebble	Flat-convex	angular	inner plan	fine/medium-grained	0	P_20	One	Long + Short	3 - Exhausted	Perpendicular	flake, bladelet	Conforti	1	1	Hard	403
3035	P20	Integer	Integer	39	17	2.29412	7	Production	Blade	1-25	Proximal	Triangular	Twisted	Plunging	flat	0	2-Bidirectional		Pisa	33	9	Radiolarite	50	50	31	70	1	1.6	Pebble	Flat-convex	angular	inner plan	fine/medium-grained	0	P_20	One	Long + Short	3 - Exhausted	Perpendicular	flake, bladelet	Conforti	1	1	Hard	403
3036	P20	Integer	Integer	30	11	2.72727	3	Production	Bladelet	0		Irregular	Concave	Feather	flat	0	1-Unidirectional		Pisa	33	9	Radiolarite	50	50	31	70	1	1.6	Pebble	Flat-convex	angular	inner plan	fine/medium-grained	0	P_20	One	Long + Short	3 - Exhausted	Perpendicular	flake, bladelet	Conforti	1	1	Hard	403
3038	P20	Fragmented	Mesial	13	11	1.18182	3	Production	Bladelet	26-50	Lateral	Triangular	Rectilinear	Broken	flat	0	1-Unidirectional		Pisa	33	9	Radiolarite	50	50	31	70	1	1.6	Pebble	Flat-convex	angular	inner plan	fine/medium-grained	0	P_20	One	Long + Short	3 - Exhausted	Perpendicular	flake, bladelet	Conforti	1	1	Hard	403
3039	P20	Fragmented	Meso-Distal	11	12	0.916667	3	Production	Bladelet	26-50	Lateral	Triangular	Concave	Feather	flat	0	1-Unidirectional		Pisa	33	9	Radiolarite	50	50	31	70	1	1.6	Pebble	Flat-convex	angular	inner plan	fine/medium-grained	0	P_20	One	Long + Short	3 - Exhausted	Perpendicular	flake, bladelet	Conforti	1	1	Hard	403
3040	P20	Integer	Integer	39	25	1.56	16	Initialization	Flake	76-99	Semi-total	Irregular	Wavy	Plunging	flatparalelepiped	0	1-Unidirectional		Pisa	33	9	Radiolarite	50	50	31	70	1	1.6	Pebble	Flat-convex	angular	inner plan	fine/medium-grained	0	P_20	One	Long + Short	3 - Exhausted	Perpendicular	flake, bladelet	Conforti	1	1	Hard	403
3041	P20	Fragmented	Meso-Proximal	34	17	2	4	Production	Blade	26-50	Mesial	Irregular	Wavy	Broken	flat	0	3-Orthogonal		Pisa	33	9	Radiolarite	50	50	31	70	1	1.6	Pebble	Flat-convex	angular	inner plan	fine/medium-grained	0	P_20	One	Long + Short	3 - Exhausted	Perpendicular	flake, bladelet	Conforti	1	1	Hard	403
3042	P20	Integer	Integer	21	24	0.875	9	Initialization	Flake	Total	Total	Irregular	Rectilinear	Feather	flat	0	Indet		Pisa	33	9	Radiolarite	50	50	31	70	1	1.6	Pebble	Flat-convex	angular	inner plan	fine/medium-grained	0	P_20	One	Long + Short	3 - Exhausted	Perpendicular	flake, bladelet	Conforti	1	1	Hard	403
3037	P20	Integer	Integer	26	11	2.36364	2	Production	Bladelet	0		Triangular	Twisted	Feather	flat	0	2-Bidirectional		Pisa	33	9	Radiolarite	50	50	31	70	1	1.6	Pebble	Flat-convex	angular	inner plan	fine/medium-grained	0	P_20	One	Long + Short	3 - Exhausted	Perpendicular	flake, bladelet	Conforti	1	1	Hard	403
3179	P20	Integer	Integer	8	11	0.727273	0	Production	Flake	0		Linear	Rectilinear	Feather	flat	0	5-Perpendicular		Pisa	33	9	Radiolarite	50	50	31	70	1	1.6	Pebble	Flat-convex	angular	inner plan	fine/medium-grained	0	P_20	One	Long + Short	3 - Exhausted	Perpendicular	flake, bladelet	Conforti	1	1	Hard	403
3043	P20	Integer	Integer	19	15	1.26667	4	Initialization	Flake	51-75	Semi-total	Trapeze	Rectilinear	Feather	flat	0	5-Perpendicular		Pisa	33	9	Radiolarite	50	50	31	70	1	1.6	Pebble	Flat-convex	angular	inner plan	fine/medium-grained	0	P_20	One	Long + Short	3 - Exhausted	Perpendicular	flake, bladelet	Conforti	1	1	Hard	403
3079	P21	Fragmented	Meso-Proximal	14	9	1.55556	4	Initialization	Bladelet	76-99	Semi-total	Irregular	Rectilinear	Broken	flat	0	2-Bidirectional		Pisa	29	14	Radiolarite	62	37	22	84	1.6	2.8	Pebble	Polyhedron	angular	inner plan	fine/medium-grained	1	P_21	One	Long	2 - Medium	Perpendicular	flake, bladelet	Conforti	2	2	Hard	311
3073	P21	Integer	Integer	18	18	1	3	Production	Flake	1-25	Lateral	Linear	Wavy	Hinged	flat	0	1-Unidirectional		Pisa	29	14	Radiolarite	62	37	22	84	1.6	2.8	Pebble	Polyhedron	angular	inner plan	fine/medium-grained	1	P_21	One	Long	2 - Medium	Perpendicular	flake, bladelet	Conforti	2	2	Hard	311
3074	P21	Fragmented	Meso-Distal	18	18	1	5	Initialization	Flake	Total	Total	Irregular	Rectilinear	Feather	flat	0	Indet		Pisa	29	14	Radiolarite	62	37	22	84	1.6	2.8	Pebble	Polyhedron	angular	inner plan	fine/medium-grained	1	P_21	One	Long	2 - Medium	Perpendicular	flake, bladelet	Conforti	2	2	Hard	311
3075	P21	Fragmented	Meso-Distal	18	11	1.63636	5	Initialization	Bladelet	76-99	Semi-total	Irregular	Rectilinear	Hinged	flat	0	5-Perpendicular		Pisa	29	14	Radiolarite	62	37	22	84	1.6	2.8	Pebble	Polyhedron	angular	inner plan	fine/medium-grained	1	P_21	One	Long	2 - Medium	Perpendicular	flake, bladelet	Conforti	2	2	Hard	311
3076	P21	Integer	Integer	18	14	1.28571	6	Production	Flake	26-50	Transversal	Trapeze	Rectilinear	Hinged	flatparalelepiped	0	1-Unidirectional		Pisa	29	14	Radiolarite	62	37	22	84	1.6	2.8	Pebble	Polyhedron	angular	inner plan	fine/medium-grained	1	P_21	One	Long	2 - Medium	Perpendicular	flake, bladelet	Conforti	2	2	Hard	311
3077	P21	Integer	Integer	21	10	2.1	5	Initialization	Bladelet	51-75	Lateral back	Irregular	Rectilinear	Broken	flatparalelepiped	0	2-Bidirectional		Pisa	29	14	Radiolarite	62	37	22	84	1.6	2.8	Pebble	Polyhedron	angular	inner plan	fine/medium-grained	1	P_21	One	Long	2 - Medium	Perpendicular	flake, bladelet	Conforti	2	2	Hard	311
3080	P21	Integer	Integer	14	12	1.16667	2	Production	Flake	26-50	Lateral	Linear	Rectilinear	Hinged	flat	0	2-Bidirectional		Pisa	29	14	Radiolarite	62	37	22	84	1.6	2.8	Pebble	Polyhedron	angular	inner plan	fine/medium-grained	1	P_21	One	Long	2 - Medium	Perpendicular	flake, bladelet	Conforti	2	2	Hard	311
3072	P21	Integer	Integer	15	18	0.833333	4	Initialization	Flake	Total	Total	Linear	Convex	Hinged	flat	0	Indet		Pisa	29	14	Radiolarite	62	37	22	84	1.6	2.8	Pebble	Polyhedron	angular	inner plan	fine/medium-grained	1	P_21	One	Long	2 - Medium	Perpendicular	flake, bladelet	Conforti	2	2	Hard	311
3182	P21	Integer	Integer	4	10	0.4	2	Production	Flake	26-50	Lateral	Irregular	Twisted	Hinged	flat	0	5-Perpendicular		Pisa	29	14	Radiolarite	62	37	22	84	1.6	2.8	Pebble	Polyhedron	angular	inner plan	fine/medium-grained	1	P_21	One	Long	2 - Medium	Perpendicular	flake, bladelet	Conforti	2	2	Hard	311
3078	P21	Integer	Integer	13	16	0.8125	6	Production	Flake	0		Irregular	Convex	Hinged	flat	0	1-Unidirectional		Pisa	29	14	Radiolarite	62	37	22	84	1.6	2.8	Pebble	Polyhedron	angular	inner plan	fine/medium-grained	1	P_21	One	Long	2 - Medium	Perpendicular	flake, bladelet	Conforti	2	2	Hard	311
3071	P21	Integer	Integer	25	21	1.19048	8	Initialization	Flake	51-75	Semi-total	Irregular	Convex	Broken	flat	0	1-Unidirectional		Pisa	29	14	Radiolarite	62	37	22	84	1.6	2.8	Pebble	Polyhedron	angular	inner plan	fine/medium-grained	1	P_21	One	Long	2 - Medium	Perpendicular	flake, bladelet	Conforti	2	2	Hard	311
3070	P21	Integer	Integer	18	15	1.2	4	Initialization	Flake	51-75	Semi-total	Linear	Convex	Hinged	flat	0	1-Unidirectional		Pisa	29	14	Radiolarite	62	37	22	84	1.6	2.8	Pebble	Polyhedron	angular	inner plan	fine/medium-grained	1	P_21	One	Long	2 - Medium	Perpendicular	flake, bladelet	Conforti	2	2	Hard	311
3069	P21	Integer	Integer	22	14	1.57143	2	Initialization	Flake	Total	Total	Linear	Wavy	Hinged	flat	0	Indet		Pisa	29	14	Radiolarite	62	37	22	84	1.6	2.8	Pebble	Polyhedron	angular	inner plan	fine/medium-grained	1	P_21	One	Long	2 - Medium	Perpendicular	flake, bladelet	Conforti	2	2	Hard	311
3068	P21	Fragmented	Meso-Proximal	13	22	0.590909	3	Initialization	Flake	1-25	Lateral	Linear	Rectilinear	Broken	flat	0	1-Unidirectional		Pisa	29	14	Radiolarite	62	37	22	84	1.6	2.8	Pebble	Polyhedron	angular	inner plan	fine/medium-grained	1	P_21	One	Long	2 - Medium	Perpendicular	flake, bladelet	Conforti	2	2	Hard	311
3067	P21	Fragmented	Meso-Distal	21	25	0.84	4	Initialization	Flake	51-75	Semi-total	Linear	Rectilinear	Feather	flat	0	1-Unidirectional		Pisa	29	14	Radiolarite	62	37	22	84	1.6	2.8	Pebble	Polyhedron	angular	inner plan	fine/medium-grained	1	P_21	One	Long	2 - Medium	Perpendicular	flake, bladelet	Conforti	2	2	Hard	311
3066	P21	Fragmented	Meso-Distal	9	4	2.25	2	Production	Bladelet	51-75	Lateral	Triangular	Twisted	Feather	flat	0	1-Unidirectional		Pisa	29	14	Radiolarite	62	37	22	84	1.6	2.8	Pebble	Polyhedron	angular	inner plan	fine/medium-grained	1	P_21	One	Long	2 - Medium	Perpendicular	flake, bladelet	Conforti	2	2	Hard	311
3064	P21	Integer	Integer	28	10	2.8	11	Initialization	Bladelet	51-75	Semi-total	Trapeze	Concave	Plunging	Truncated pyramid/frustum	0	Indet		Pisa	29	14	Radiolarite	62	37	22	84	1.6	2.8	Pebble	Polyhedron	angular	inner plan	fine/medium-grained	1	P_21	One	Long	2 - Medium	Perpendicular	flake, bladelet	Conforti	2	2	Hard	311
3181	P21	Fragmented	Lateral	10	6	1.66667	2	Production	Flake	0		Linear	Wavy	Hinged	flat	0	Indet		Pisa	29	14	Radiolarite	62	37	22	84	1.6	2.8	Pebble	Polyhedron	angular	inner plan	fine/medium-grained	1	P_21	One	Long	2 - Medium	Perpendicular	flake, bladelet	Conforti	2	2	Hard	311
3081	P21	Integer	Integer	18	14	1.28571	5	Production	Backed flake	26-50	Lateral back	Triangular	Wavy	Hinged	flat	0	1-Unidirectional		Pisa	29	14	Radiolarite	62	37	22	84	1.6	2.8	Pebble	Polyhedron	angular	inner plan	fine/medium-grained	1	P_21	One	Long	2 - Medium	Perpendicular	flake, bladelet	Conforti	2	2	Hard	311
3065	P21	Fragmented	Meso-Proximal	19	7	2.71429	3	Production	Bladelet	26-50	Lateral	Triangular	Twisted	Broken	flat	0	2-Bidirectional		Pisa	29	14	Radiolarite	62	37	22	84	1.6	2.8	Pebble	Polyhedron	angular	inner plan	fine/medium-grained	1	P_21	One	Long	2 - Medium	Perpendicular	flake, bladelet	Conforti	2	2	Hard	311
3083	P21	Integer	Integer	14	8	1.75	1	Production	Backed flake	1-25	Lateral back	Linear	Rectilinear	Feather	flat	0	1-Unidirectional		Pisa	29	14	Radiolarite	62	37	22	84	1.6	2.8	Pebble	Polyhedron	angular	inner plan	fine/medium-grained	1	P_21	One	Long	2 - Medium	Perpendicular	flake, bladelet	Conforti	2	2	Hard	311
3084	P21	Integer	Integer	7	14	0.5	2	Production	Flake	0		Linear	Convex	Hinged	flat	0	1-Unidirectional		Pisa	29	14	Radiolarite	62	37	22	84	1.6	2.8	Pebble	Polyhedron	angular	inner plan	fine/medium-grained	1	P_21	One	Long	2 - Medium	Perpendicular	flake, bladelet	Conforti	2	2	Hard	311
3085	P21	Integer	Integer	5	12	0.416667	2	Production	Flake	0		Linear	Wavy	Hinged	flat	0	1-Unidirectional		Pisa	29	14	Radiolarite	62	37	22	84	1.6	2.8	Pebble	Polyhedron	angular	inner plan	fine/medium-grained	1	P_21	One	Long	2 - Medium	Perpendicular	flake, bladelet	Conforti	2	2	Hard	311
3086	P21	Integer	Integer	8	13	0.615385	1	Initialization	Flake	76-99	Semi-total	Linear	Rectilinear	Feather	flat	0	Indet		Pisa	29	14	Radiolarite	62	37	22	84	1.6	2.8	Pebble	Polyhedron	angular	inner plan	fine/medium-grained	1	P_21	One	Long	2 - Medium	Perpendicular	flake, bladelet	Conforti	2	2	Hard	311
3087	P21	Integer	Integer	13	2	6.5	1	Production	Bladelet	51-75	Lateral	Triangular	Rectilinear	Feather	flat	0	1-Unidirectional		Pisa	29	14	Radiolarite	62	37	22	84	1.6	2.8	Pebble	Polyhedron	angular	inner plan	fine/medium-grained	1	P_21	One	Long	2 - Medium	Perpendicular	flake, bladelet	Conforti	2	2	Hard	311
3088	P21	Integer	Integer	11	3	3.66667	0	Production	Bladelet	0		Linear	Rectilinear	Feather	flat	0	1-Unidirectional		Pisa	29	14	Radiolarite	62	37	22	84	1.6	2.8	Pebble	Polyhedron	angular	inner plan	fine/medium-grained	1	P_21	One	Long	2 - Medium	Perpendicular	flake, bladelet	Conforti	2	2	Hard	311
3089	P21	Integer	Integer	9	10	0.9	1	Production	Flake	0		Linear	Convex	Feather	flat	0	1-Unidirectional		Pisa	29	14	Radiolarite	62	37	22	84	1.6	2.8	Pebble	Polyhedron	angular	inner plan	fine/medium-grained	1	P_21	One	Long	2 - Medium	Perpendicular	flake, bladelet	Conforti	2	2	Hard	311
3082	P21	Integer	Integer	11	11	1	3	Production	Flake	0		Linear	Rectilinear	Feather	flat	0	1-Unidirectional		Pisa	29	14	Radiolarite	62	37	22	84	1.6	2.8	Pebble	Polyhedron	angular	inner plan	fine/medium-grained	1	P_21	One	Long	2 - Medium	Perpendicular	flake, bladelet	Conforti	2	2	Hard	311
3063	P21	Integer	Integer	47	35	1.34286	20	Production	Core	26-50	Lateral back				flatparalelepiped	2	2-Bidirectional		Pisa	29	14	Radiolarite	62	37	22	84	1.6	2.8	Pebble	Polyhedron	angular	inner plan	fine/medium-grained	1	P_21	One	Long	2 - Medium	Perpendicular	flake, bladelet	Conforti	2	2	Hard	311
3095	P22	Fragmented	Meso-Distal	11	4	2.75	0	Initialization	Bladelet	Total	Total	Linear	Twisted	Feather	flat	0	Indet		Pisa	12	15	Radiolarite	52	34	24	55	1.5	2.1	Pebble	Flat-convex	angular	inner plan	fine/medium-grained	1	P_22	One	Long	3 - Exhausted	Perpendicular	flake, bladelet	Lombardo	2	2	Hard	311
3183	P22	Integer	Integer	7	10	0.7	2	Production	Flake	1-25	Proximal	Irregular	Rectilinear	Hinged	flat	0	1-Unidirectional		Pisa	12	15	Radiolarite	52	34	24	55	1.5	2.1	Pebble	Flat-convex	angular	inner plan	fine/medium-grained	1	P_22	One	Long	3 - Exhausted	Perpendicular	flake, bladelet	Lombardo	2	2	Hard	311
3100	P22	Fragmented	Meso-Distal	5	10	0.5	0	Initialization	Flake	51-75	Semi-total	Linear	Rectilinear	Feather	flat	0	1-Unidirectional		Pisa	12	15	Radiolarite	52	34	24	55	1.5	2.1	Pebble	Flat-convex	angular	inner plan	fine/medium-grained	1	P_22	One	Long	3 - Exhausted	Perpendicular	flake, bladelet	Lombardo	2	2	Hard	311
3099	P22	Fragmented	Lateral	10	6	1.66667	1	Initialization	Flake	76-99	Semi-total	Irregular	Rectilinear	Hinged	flat	0	Indet		Pisa	12	15	Radiolarite	52	34	24	55	1.5	2.1	Pebble	Flat-convex	angular	inner plan	fine/medium-grained	1	P_22	One	Long	3 - Exhausted	Perpendicular	flake, bladelet	Lombardo	2	2	Hard	311
3098	P22	Fragmented	Proximal	7	11	0.636364	3	Production	Flake	26-50	Proximal	Irregular	Convex	Broken	flat	0	1-Unidirectional		Pisa	12	15	Radiolarite	52	34	24	55	1.5	2.1	Pebble	Flat-convex	angular	inner plan	fine/medium-grained	1	P_22	One	Long	3 - Exhausted	Perpendicular	flake, bladelet	Lombardo	2	2	Hard	311
3096	P22	Fragmented	Meso-Distal	11	9	1.22222	4	Initialization	Flake	Total	Total	Irregular	Concave	Plunging	flat	0	Indet		Pisa	12	15	Radiolarite	52	34	24	55	1.5	2.1	Pebble	Flat-convex	angular	inner plan	fine/medium-grained	1	P_22	One	Long	3 - Exhausted	Perpendicular	flake, bladelet	Lombardo	2	2	Hard	311
3094	P22	Fragmented	Mesial	14	6	2.33333	4	Initialization	Flake	51-75	Semi-total	Irregular	Concave	Broken	flatparalelepiped	0	2-Bidirectional		Pisa	12	15	Radiolarite	52	34	24	55	1.5	2.1	Pebble	Flat-convex	angular	inner plan	fine/medium-grained	1	P_22	One	Long	3 - Exhausted	Perpendicular	flake, bladelet	Lombardo	2	2	Hard	311
3093	P22	Fragmented	Lateral	9	11	0.818182	1	Initialization	Flake	Total	Total	Linear	Rectilinear	Feather	flat	0	Indet		Pisa	12	15	Radiolarite	52	34	24	55	1.5	2.1	Pebble	Flat-convex	angular	inner plan	fine/medium-grained	1	P_22	One	Long	3 - Exhausted	Perpendicular	flake, bladelet	Lombardo	2	2	Hard	311
3092	P22	Integer	Integer	17	10	1.7	2	Initialization	Flake	Total	Total	Linear	Concave	Feather	flat	0	Indet		Pisa	12	15	Radiolarite	52	34	24	55	1.5	2.1	Pebble	Flat-convex	angular	inner plan	fine/medium-grained	1	P_22	One	Long	3 - Exhausted	Perpendicular	flake, bladelet	Lombardo	2	2	Hard	311
3091	P22	Integer	Integer	47	20	2.35	9	Initialization	Blade	76-99	Semi-total	Triangular	Rectilinear	Plunging	flat	0	1-Unidirectional		Pisa	12	15	Radiolarite	52	34	24	55	1.5	2.1	Pebble	Flat-convex	angular	inner plan	fine/medium-grained	1	P_22	One	Long	3 - Exhausted	Perpendicular	flake, bladelet	Lombardo	2	2	Hard	311
3090	P22	Integer	Integer	44	23	1.91304	29	Production	Core	51-75	Lateral back				triangular prism	2	2-Bidirectional		Pisa	12	15	Radiolarite	52	34	24	55	1.5	2.1	Pebble	Flat-convex	angular	inner plan	fine/medium-grained	1	P_22	One	Long	3 - Exhausted	Perpendicular	flake, bladelet	Lombardo	2	2	Hard	311
3097	P22	Integer	Integer	9	12	0.75	0	Production	Flake	0		Linear	Rectilinear	Feather	flat	0	1-Unidirectional		Pisa	12	15	Radiolarite	52	34	24	55	1.5	2.1	Pebble	Flat-convex	angular	inner plan	fine/medium-grained	1	P_22	One	Long	3 - Exhausted	Perpendicular	flake, bladelet	Lombardo	2	2	Hard	311
3109	P23	Integer	Integer	10	7	1.42857	3	Production	Flake	26-50	Lateral	Triangular	Concave	Feather	flat	0	3-Orthogonal		Pisa	15	16	Radiolarite	53	45	19	67	1.1	3.1	Pebble	Polyhedron	angular	inner plan	medium-grained	1	P_23	One	Long	3 - Exhausted	Perpendicular	flake, bladelet	Lombardo	2	2	Hard	311
3103	P23	Integer	Integer	30	27	1.11111	8	Initialization	Flake	Total	Total	Irregular	Wavy	Hinged	flat	0	Indet		Pisa	15	16	Radiolarite	53	45	19	67	1.1	3.1	Pebble	Polyhedron	angular	inner plan	medium-grained	1	P_23	One	Long	3 - Exhausted	Perpendicular	flake, bladelet	Lombardo	2	2	Hard	311
3185	P23	Fragmented	Proximal	5	10	0.5	2	Production	Backed flake	26-50	Lateral back	Irregular	Rectilinear	Broken	flat	0	5-Perpendicular		Pisa	15	16	Radiolarite	53	45	19	67	1.1	3.1	Pebble	Polyhedron	angular	inner plan	medium-grained	1	P_23	One	Long	3 - Exhausted	Perpendicular	flake, bladelet	Lombardo	2	2	Hard	311
3184	P23	Fragmented	Composite	10	5	2	4	Production	Chunk	1-25		Irregular				0	3-Orthogonal		Pisa	15	16	Radiolarite	53	45	19	67	1.1	3.1	Pebble	Polyhedron	angular	inner plan	medium-grained	1	P_23	One	Long	3 - Exhausted	Perpendicular	flake, bladelet	Lombardo	2	2	Hard	311
3113	P23	Fragmented	Composite	21	10	2.1	13	Production	Chunk	26-50		Irregular				0	Indet		Pisa	15	16	Radiolarite	53	45	19	67	1.1	3.1	Pebble	Polyhedron	angular	inner plan	medium-grained	1	P_23	One	Long	3 - Exhausted	Perpendicular	flake, bladelet	Lombardo	2	2	Hard	311
3112	P23	Fragmented	Composite	19	15	1.26667	11	Production	Chunk	26-50		Irregular				0	2-Bidirectional		Pisa	15	16	Radiolarite	53	45	19	67	1.1	3.1	Pebble	Polyhedron	angular	inner plan	medium-grained	1	P_23	One	Long	3 - Exhausted	Perpendicular	flake, bladelet	Lombardo	2	2	Hard	311
3111	P23	Fragmented	Composite	23	20	1.15	12	Production	Chunk	51-75	Semi-total	Irregular				0	Indet		Pisa	15	16	Radiolarite	53	45	19	67	1.1	3.1	Pebble	Polyhedron	angular	inner plan	medium-grained	1	P_23	One	Long	3 - Exhausted	Perpendicular	flake, bladelet	Lombardo	2	2	Hard	311
3110	P23	Fragmented	Lateral	10	4	2.5	2	Production	Flake	1-25	Proximal	Linear	Rectilinear	Hinged	flat	0	2-Bidirectional		Pisa	15	16	Radiolarite	53	45	19	67	1.1	3.1	Pebble	Polyhedron	angular	inner plan	medium-grained	1	P_23	One	Long	3 - Exhausted	Perpendicular	flake, bladelet	Lombardo	2	2	Hard	311
3101	P23	Integer	Integer	39	22	1.77273	11	Production	Core	1-25	Distal				flatparalelepiped	2	2-Bidirectional		Pisa	15	16	Radiolarite	53	45	19	67	1.1	3.1	Pebble	Polyhedron	angular	inner plan	medium-grained	1	P_23	One	Long	3 - Exhausted	Perpendicular	flake, bladelet	Lombardo	2	2	Hard	311
3107	P23	Fragmented	Mesial	20	12	1.66667	3	Initialization	Bladelet	Total	Total	Linear	Twisted	Broken	flat	0	Indet		Pisa	15	16	Radiolarite	53	45	19	67	1.1	3.1	Pebble	Polyhedron	angular	inner plan	medium-grained	1	P_23	One	Long	3 - Exhausted	Perpendicular	flake, bladelet	Lombardo	2	2	Hard	311
3106	P23	Fragmented	Mesial	18	12	1.5	3	Initialization	Flake	Total	Total	Linear	Rectilinear	Broken	flat	0	Indet		Pisa	15	16	Radiolarite	53	45	19	67	1.1	3.1	Pebble	Polyhedron	angular	inner plan	medium-grained	1	P_23	One	Long	3 - Exhausted	Perpendicular	flake, bladelet	Lombardo	2	2	Hard	311
3104	P23	Fragmented	Meso-Proximal	28	24	1.16667	7	Production	Flake	26-50	Transversal	Irregular	Rectilinear	Broken	flat	0	2-Bidirectional		Pisa	15	16	Radiolarite	53	45	19	67	1.1	3.1	Pebble	Polyhedron	angular	inner plan	medium-grained	1	P_23	One	Long	3 - Exhausted	Perpendicular	flake, bladelet	Lombardo	2	2	Hard	311
3102	P23	Integer	Integer	45	19	2.36842	13	Initialization	Blade	76-99	Semi-total	Irregular	Wavy	Broken	flat	0	1-Unidirectional		Pisa	15	16	Radiolarite	53	45	19	67	1.1	3.1	Pebble	Polyhedron	angular	inner plan	medium-grained	1	P_23	One	Long	3 - Exhausted	Perpendicular	flake, bladelet	Lombardo	2	2	Hard	311
3108	P23	Fragmented	Distal	16	26	0.615385	8	Production	Flake	26-50	Distal	Irregular	Rectilinear	Plunging	flat	0	1-Unidirectional		Pisa	15	16	Radiolarite	53	45	19	67	1.1	3.1	Pebble	Polyhedron	angular	inner plan	medium-grained	1	P_23	One	Long	3 - Exhausted	Perpendicular	flake, bladelet	Lombardo	2	2	Hard	311
3105	P23	Fragmented	Proximal	14	15	0.933333	4	Initialization	Flake	Total	Total	Linear	Wavy	Broken	flat	0	Indet		Pisa	15	16	Radiolarite	53	45	19	67	1.1	3.1	Pebble	Polyhedron	angular	inner plan	medium-grained	1	P_23	One	Long	3 - Exhausted	Perpendicular	flake, bladelet	Lombardo	2	2	Hard	311
3135	P24	Fragmented	Lateral	15	4	3.75	1	Initialization	Flake	Total	Total	Linear	Twisted	Feather	flat	0	Indet		Pisa	29	19	Radiolarite	60	42	22	55	1.4	2.7	Pebble	Polyhedron	angular	inner plan	medium-grained	2	P_24	One	Long	3 - Exhausted	Perpendicular	flake, bladelet	Lombardo	3	3	Hard	528
3140	P24	Integer	Integer	29	28	1.03571	13	Production	Core	26-50	Transversal				flatparalelepiped	2	2-Bidirectional		Pisa	29	19	Radiolarite	60	42	22	55	1.4	2.7	Pebble	Polyhedron	angular	inner plan	medium-grained	2	P_24	One	Long	3 - Exhausted	Perpendicular	flake, bladelet	Lombardo	3	3	Hard	528
3139	P24	Integer	Integer	35	31	1.12903	13	Production	Core	26-50	Lateral				flatparalelepiped	2	2-Bidirectional		Pisa	29	19	Radiolarite	60	42	22	55	1.4	2.7	Pebble	Polyhedron	angular	inner plan	medium-grained	2	P_24	One	Long	3 - Exhausted	Perpendicular	flake, bladelet	Lombardo	3	3	Hard	528
3138	P24	Fragmented	Composite	11	3	3.66667	2	Production	Chunk	0		Irregular				0	Indet		Pisa	29	19	Radiolarite	60	42	22	55	1.4	2.7	Pebble	Polyhedron	angular	inner plan	medium-grained	2	P_24	One	Long	3 - Exhausted	Perpendicular	flake, bladelet	Lombardo	3	3	Hard	528
3137	P24	Fragmented	Lateral	10	3	3.33333	2	Production	Flake	0		Irregular	Twisted	Hinged	flat	0	1-Unidirectional		Pisa	29	19	Radiolarite	60	42	22	55	1.4	2.7	Pebble	Polyhedron	angular	inner plan	medium-grained	2	P_24	One	Long	3 - Exhausted	Perpendicular	flake, bladelet	Lombardo	3	3	Hard	528
3187	P24	Fragmented	Composite	10	8	1.25	1	Production	Flake	0		Linear	Rectilinear	Feather	flat	0	1-Unidirectional		Pisa	29	19	Radiolarite	60	42	22	55	1.4	2.7	Pebble	Polyhedron	angular	inner plan	medium-grained	2	P_24	One	Long	3 - Exhausted	Perpendicular	flake, bladelet	Lombardo	3	3	Hard	528
3130	P24	Fragmented	Mesial	14	4	3.5	2	Production	Bladelet	0		Irregular	Rectilinear	Broken	flat	0	Indet		Pisa	29	19	Radiolarite	60	42	22	55	1.4	2.7	Pebble	Polyhedron	angular	inner plan	medium-grained	2	P_24	One	Long	3 - Exhausted	Perpendicular	flake, bladelet	Lombardo	3	3	Hard	528
3134	P24	Integer	Integer	6	12	0.5	2	Production	Flake	0		Triangular	Rectilinear	Feather	flat	0	1-Unidirectional		Pisa	29	19	Radiolarite	60	42	22	55	1.4	2.7	Pebble	Polyhedron	angular	inner plan	medium-grained	2	P_24	One	Long	3 - Exhausted	Perpendicular	flake, bladelet	Lombardo	3	3	Hard	528
3131	P24	Fragmented	Mesial	13	6	2.16667	2	Production	Flake	0		Irregular	Rectilinear	Broken	flat	0	2-Bidirectional		Pisa	29	19	Radiolarite	60	42	22	55	1.4	2.7	Pebble	Polyhedron	angular	inner plan	medium-grained	2	P_24	One	Long	3 - Exhausted	Perpendicular	flake, bladelet	Lombardo	3	3	Hard	528
3132	P24	Integer	Integer	12	7	1.71429	1	Production	Flake	0		Linear	Rectilinear	Hinged	flat	0	1-Unidirectional		Pisa	29	19	Radiolarite	60	42	22	55	1.4	2.7	Pebble	Polyhedron	angular	inner plan	medium-grained	2	P_24	One	Long	3 - Exhausted	Perpendicular	flake, bladelet	Lombardo	3	3	Hard	528
3133	P24	Fragmented	Lateral	12	5	2.4	3	Initialization	Flake	51-75	Distal	Irregular	Twisted	Feather	flat	0	1-Unidirectional		Pisa	29	19	Radiolarite	60	42	22	55	1.4	2.7	Pebble	Polyhedron	angular	inner plan	medium-grained	2	P_24	One	Long	3 - Exhausted	Perpendicular	flake, bladelet	Lombardo	3	3	Hard	528
3119	P24	Fragmented	Lateral	15	10	1.5	4	Production	Flake	26-50	Lateral	Irregular	Twisted	Hinged	flat	0	1-Unidirectional		Pisa	29	19	Radiolarite	60	42	22	55	1.4	2.7	Pebble	Polyhedron	angular	inner plan	medium-grained	2	P_24	One	Long	3 - Exhausted	Perpendicular	flake, bladelet	Lombardo	3	3	Hard	528
3186	P24	Fragmented	Distal	5	10	0.5	1	Initialization	Flake	Total	Total	Irregular	Rectilinear	Hinged	flat	0	Indet		Pisa	29	19	Radiolarite	60	42	22	55	1.4	2.7	Pebble	Polyhedron	angular	inner plan	medium-grained	2	P_24	One	Long	3 - Exhausted	Perpendicular	flake, bladelet	Lombardo	3	3	Hard	528
3125	P24	Fragmented	Meso-Distal	13	12	1.08333	1	Initialization	Flake	Total	Total	Linear	Rectilinear	Feather	flat	0	Indet		Pisa	29	19	Radiolarite	60	42	22	55	1.4	2.7	Pebble	Polyhedron	angular	inner plan	medium-grained	2	P_24	One	Long	3 - Exhausted	Perpendicular	flake, bladelet	Lombardo	3	3	Hard	528
3114	P24	Integer	Integer	40	24	1.66667	7	Initialization	Flake	51-75	Semi-total	Irregular	Wavy	Feather	flat	0	2-Bidirectional		Pisa	29	19	Radiolarite	60	42	22	55	1.4	2.7	Pebble	Polyhedron	angular	inner plan	medium-grained	2	P_24	One	Long	3 - Exhausted	Perpendicular	flake, bladelet	Lombardo	3	3	Hard	528
3115	P24	Integer	Integer	40	14	2.85714	4	Initialization	Blade	76-99	Semi-total	Irregular	Twisted	Feather	flat	0	1-Unidirectional		Pisa	29	19	Radiolarite	60	42	22	55	1.4	2.7	Pebble	Polyhedron	angular	inner plan	medium-grained	2	P_24	One	Long	3 - Exhausted	Perpendicular	flake, bladelet	Lombardo	3	3	Hard	528
3116	P24	Fragmented	Meso-Distal	28	22	1.27273	3	Initialization	Flake	76-99	Semi-total	Irregular	Rectilinear	Hinged	flat	0	1-Unidirectional		Pisa	29	19	Radiolarite	60	42	22	55	1.4	2.7	Pebble	Polyhedron	angular	inner plan	medium-grained	2	P_24	One	Long	3 - Exhausted	Perpendicular	flake, bladelet	Lombardo	3	3	Hard	528
3117	P24	Fragmented	Lateral	14	9	1.55556	6	Production	Flake	0		Irregular	Wavy	Hinged	flat	0	1-Unidirectional		Pisa	29	19	Radiolarite	60	42	22	55	1.4	2.7	Pebble	Polyhedron	angular	inner plan	medium-grained	2	P_24	One	Long	3 - Exhausted	Perpendicular	flake, bladelet	Lombardo	3	3	Hard	528
3118	P24	Integer	Integer	10	14	0.714286	4	Production	Flake	0		Linear	Rectilinear	Hinged	flat	0	1-Unidirectional		Pisa	29	19	Radiolarite	60	42	22	55	1.4	2.7	Pebble	Polyhedron	angular	inner plan	medium-grained	2	P_24	One	Long	3 - Exhausted	Perpendicular	flake, bladelet	Lombardo	3	3	Hard	528
3120	P24	Fragmented	Meso-Distal	14	12	1.16667	3	Production	Flake	26-50	Transversal	Irregular	Wavy	Hinged	flat	0	1-Unidirectional		Pisa	29	19	Radiolarite	60	42	22	55	1.4	2.7	Pebble	Polyhedron	angular	inner plan	medium-grained	2	P_24	One	Long	3 - Exhausted	Perpendicular	flake, bladelet	Lombardo	3	3	Hard	528
3136	P24	Integer	Integer	21	14	1.5	11	Initialization	Flake	Total	Total	Irregular	Rectilinear	Hinged	poligonal	0	Indet		Pisa	29	19	Radiolarite	60	42	22	55	1.4	2.7	Pebble	Polyhedron	angular	inner plan	medium-grained	2	P_24	One	Long	3 - Exhausted	Perpendicular	flake, bladelet	Lombardo	3	3	Hard	528
3122	P24	Fragmented	Meso-Distal	13	10	1.3	4	Production	Flake	0		Triangular	Rectilinear	Hinged	flat	0	1-Unidirectional		Pisa	29	19	Radiolarite	60	42	22	55	1.4	2.7	Pebble	Polyhedron	angular	inner plan	medium-grained	2	P_24	One	Long	3 - Exhausted	Perpendicular	flake, bladelet	Lombardo	3	3	Hard	528
3121	P24	Integer	Integer	15	10	1.5	3	Initialization	Flake	Total	Total	Irregular	Rectilinear	Hinged	flat	0	Indet		Pisa	29	19	Radiolarite	60	42	22	55	1.4	2.7	Pebble	Polyhedron	angular	inner plan	medium-grained	2	P_24	One	Long	3 - Exhausted	Perpendicular	flake, bladelet	Lombardo	3	3	Hard	528
3124	P24	Fragmented	Meso-Distal	14	8	1.75	1	Initialization	Flake	Total	Total	Linear	Rectilinear	Feather	flat	0	Indet		Pisa	29	19	Radiolarite	60	42	22	55	1.4	2.7	Pebble	Polyhedron	angular	inner plan	medium-grained	2	P_24	One	Long	3 - Exhausted	Perpendicular	flake, bladelet	Lombardo	3	3	Hard	528
3129	P24	Integer	Integer	8	10	0.8	2	Initialization	Flake	Total	Total	Irregular	Rectilinear	Feather	flat	0	Indet		Pisa	29	19	Radiolarite	60	42	22	55	1.4	2.7	Pebble	Polyhedron	angular	inner plan	medium-grained	2	P_24	One	Long	3 - Exhausted	Perpendicular	flake, bladelet	Lombardo	3	3	Hard	528
3127	P24	Integer	Integer	11	10	1.1	1	Production	Flake	26-50	Semi-total	Linear	Rectilinear	Feather	flat	0	1-Unidirectional		Pisa	29	19	Radiolarite	60	42	22	55	1.4	2.7	Pebble	Polyhedron	angular	inner plan	medium-grained	2	P_24	One	Long	3 - Exhausted	Perpendicular	flake, bladelet	Lombardo	3	3	Hard	528
3128	P24	Fragmented	Mesial	6	11	0.545455	0	Initialization	Flake	Total	Total	Linear	Rectilinear	Broken	flat	0	Indet		Pisa	29	19	Radiolarite	60	42	22	55	1.4	2.7	Pebble	Polyhedron	angular	inner plan	medium-grained	2	P_24	One	Long	3 - Exhausted	Perpendicular	flake, bladelet	Lombardo	3	3	Hard	528
3126	P24	Fragmented	Lateral	15	8	1.875	2	Production	Flake	51-75	Semi-total	Linear	Twisted	Feather	flat	0	3-Orthogonal		Pisa	29	19	Radiolarite	60	42	22	55	1.4	2.7	Pebble	Polyhedron	angular	inner plan	medium-grained	2	P_24	One	Long	3 - Exhausted	Perpendicular	flake, bladelet	Lombardo	3	3	Hard	528
3123	P24	Fragmented	Meso-Distal	16	7	2.28571	2	Initialization	Bladelet	Total	Total	Irregular	Rectilinear	Feather	flat	0	Indet		Pisa	29	19	Radiolarite	60	42	22	55	1.4	2.7	Pebble	Polyhedron	angular	inner plan	medium-grained	2	P_24	One	Long	3 - Exhausted	Perpendicular	flake, bladelet	Lombardo	3	3	Hard	528
3151	P25	Fragmented	Mesial	9	13	0.692308	2	Initialization	Flake	Total	Total	Irregular	Rectilinear	Broken	flat	0	Indet		Pisa	24	20	Radiolarite	46	39	23	58	1.1	2	Pebble	Polyhedron	sub-angular	inner plan	medium-grained	2	P_25	One	Long	3 - Exhausted	Perpendicular	flake, bladelet	Conforti	3	3	Hard	528
3150	P25	Fragmented	Meso-Proximal	14	11	1.27273	3	Production	Backed flake	26-50	Lateral back	Trapeze	Rectilinear	Broken	flat	0	2-Bidirectional		Pisa	24	20	Radiolarite	46	39	23	58	1.1	2	Pebble	Polyhedron	sub-angular	inner plan	medium-grained	2	P_25	One	Long	3 - Exhausted	Perpendicular	flake, bladelet	Conforti	3	3	Hard	528
3149	P25	Integer	Integer	20	10	2	4	Production	Bladelet	26-50	Lateral back	Trapeze	Rectilinear	Feather	flat	0	2-Bidirectional		Pisa	24	20	Radiolarite	46	39	23	58	1.1	2	Pebble	Polyhedron	sub-angular	inner plan	medium-grained	2	P_25	One	Long	3 - Exhausted	Perpendicular	flake, bladelet	Conforti	3	3	Hard	528
3148	P25	Integer	Integer	22	11	2	5	Production	Bladelet	1-25	Lateral	Irregular	Twisted	Hinged	flat	0	1-Unidirectional		Pisa	24	20	Radiolarite	46	39	23	58	1.1	2	Pebble	Polyhedron	sub-angular	inner plan	medium-grained	2	P_25	One	Long	3 - Exhausted	Perpendicular	flake, bladelet	Conforti	3	3	Hard	528
3147	P25	Fragmented	Lateral	23	16	1.4375	7	Production	Flake	0		Triangular	Rectilinear	Feather	flat	0	2-Bidirectional		Pisa	24	20	Radiolarite	46	39	23	58	1.1	2	Pebble	Polyhedron	sub-angular	inner plan	medium-grained	2	P_25	One	Long	3 - Exhausted	Perpendicular	flake, bladelet	Conforti	3	3	Hard	528
3146	P25	Fragmented	Meso-Distal	30	16	1.875	4	Initialization	Flake	51-75	Semi-total	Irregular	Twisted	Broken	flat	0	1-Unidirectional		Pisa	24	20	Radiolarite	46	39	23	58	1.1	2	Pebble	Polyhedron	sub-angular	inner plan	medium-grained	2	P_25	One	Long	3 - Exhausted	Perpendicular	flake, bladelet	Conforti	3	3	Hard	528
3145	P25	Integer	Integer	17	21	0.809524	8	Initialization	Flake	Total	Total	Irregular	Rectilinear	Plunging	flat	0	Indet		Pisa	24	20	Radiolarite	46	39	23	58	1.1	2	Pebble	Polyhedron	sub-angular	inner plan	medium-grained	2	P_25	One	Long	3 - Exhausted	Perpendicular	flake, bladelet	Conforti	3	3	Hard	528
3144	P25	Integer	Integer	32	22	1.45455	5	Production	Backed flake	1-25	Lateral back	Linear	Rectilinear	Hinged	flat	0	1-Unidirectional		Pisa	24	20	Radiolarite	46	39	23	58	1.1	2	Pebble	Polyhedron	sub-angular	inner plan	medium-grained	2	P_25	One	Long	3 - Exhausted	Perpendicular	flake, bladelet	Conforti	3	3	Hard	528
3188	P25	Integer	Integer	10	3	3.33333	1	Production	Bladelet	0		Triangular	Rectilinear	Feather	flat	0	2-Bidirectional		Pisa	24	20	Radiolarite	46	39	23	58	1.1	2	Pebble	Polyhedron	sub-angular	inner plan	medium-grained	2	P_25	One	Long	3 - Exhausted	Perpendicular	flake, bladelet	Conforti	3	3	Hard	528
3189	P25	Fragmented	Meso-Proximal	10	9	1.11111	2	Production	Flake	0		Irregular	Rectilinear	Broken	flat	0	2-Bidirectional		Pisa	24	20	Radiolarite	46	39	23	58	1.1	2	Pebble	Polyhedron	sub-angular	inner plan	medium-grained	2	P_25	One	Long	3 - Exhausted	Perpendicular	flake, bladelet	Conforti	3	3	Hard	528
3143	P25	Integer	Integer	45	26	1.73077	9	Initialization	Flake	Total	Total	Irregular	Rectilinear	Plunging	flat	0	Indet		Pisa	24	20	Radiolarite	46	39	23	58	1.1	2	Pebble	Polyhedron	sub-angular	inner plan	medium-grained	2	P_25	One	Long	3 - Exhausted	Perpendicular	flake, bladelet	Conforti	3	3	Hard	528
3142	P25	Integer	Integer	38	12	3.16667	10	Production	Core	1-25	Lateral back				Truncated pyramid/frustum	2	2-Bidirectional		Pisa	24	20	Radiolarite	46	39	23	58	1.1	2	Pebble	Polyhedron	sub-angular	inner plan	medium-grained	2	P_25	One	Long	3 - Exhausted	Perpendicular	flake, bladelet	Conforti	3	3	Hard	528
3141	P25	Integer	Integer	28	17	1.64706	12	Production	Core	26-50	Lateral				Truncated pyramid/frustum	3	2-Bidirectional		Pisa	24	20	Radiolarite	46	39	23	58	1.1	2	Pebble	Polyhedron	sub-angular	inner plan	medium-grained	2	P_25	One	Long	3 - Exhausted	Perpendicular	flake, bladelet	Conforti	3	3	Hard	528
3152	P25	Integer	Integer	9	10	0.9	3	Production	Flake	26-50	Lateral	Triangular	Rectilinear	Feather	flat	0	1-Unidirectional		Pisa	24	20	Radiolarite	46	39	23	58	1.1	2	Pebble	Polyhedron	sub-angular	inner plan	medium-grained	2	P_25	One	Long	3 - Exhausted	Perpendicular	flake, bladelet	Conforti	3	3	Hard	528
3156	P25	Fragmented	Meso-Proximal	21	5	4.2	5	Production	Bladelet	26-50	Lateral back	Triangular	Twisted	Broken	flat	0	Indet		Pisa	24	20	Radiolarite	46	39	23	58	1.1	2	Pebble	Polyhedron	sub-angular	inner plan	medium-grained	2	P_25	One	Long	3 - Exhausted	Perpendicular	flake, bladelet	Conforti	3	3	Hard	528
3162	P25	Integer	Integer	12	2	6	1	Production	Bladelet	0		Trapeze	Rectilinear	Feather	flat	0	1-Unidirectional		Pisa	24	20	Radiolarite	46	39	23	58	1.1	2	Pebble	Polyhedron	sub-angular	inner plan	medium-grained	2	P_25	One	Long	3 - Exhausted	Perpendicular	flake, bladelet	Conforti	3	3	Hard	528
3153	P25	Fragmented	Composite	16	3	5.33333	2	Production	Chunk	26-50		Irregular				0	1-Unidirectional		Pisa	24	20	Radiolarite	46	39	23	58	1.1	2	Pebble	Polyhedron	sub-angular	inner plan	medium-grained	2	P_25	One	Long	3 - Exhausted	Perpendicular	flake, bladelet	Conforti	3	3	Hard	528
3154	P25	Fragmented	Meso-Distal	32	8	4	6	Production	Bladelet	0		Irregular	Twisted	Feather	flat	0	2-Bidirectional		Pisa	24	20	Radiolarite	46	39	23	58	1.1	2	Pebble	Polyhedron	sub-angular	inner plan	medium-grained	2	P_25	One	Long	3 - Exhausted	Perpendicular	flake, bladelet	Conforti	3	3	Hard	528
3155	P25	Fragmented	Meso-Distal	25	8	3.125	4	Production	Bladelet	51-75	Lateral	Triangular	Twisted	Feather	flat	0	1-Unidirectional		Pisa	24	20	Radiolarite	46	39	23	58	1.1	2	Pebble	Polyhedron	sub-angular	inner plan	medium-grained	2	P_25	One	Long	3 - Exhausted	Perpendicular	flake, bladelet	Conforti	3	3	Hard	528
3157	P25	Integer	Integer	19	9	2.11111	2	Production	Bladelet	0		Irregular	Rectilinear	Feather	flat	0	2-Bidirectional		Pisa	24	20	Radiolarite	46	39	23	58	1.1	2	Pebble	Polyhedron	sub-angular	inner plan	medium-grained	2	P_25	One	Long	3 - Exhausted	Perpendicular	flake, bladelet	Conforti	3	3	Hard	528
3159	P25	Fragmented	Meso-Distal	11	6	1.83333	2	Production	Bladelet	26-50	Lateral	Triangular	Rectilinear	Feather	flat	0	2-Bidirectional		Pisa	24	20	Radiolarite	46	39	23	58	1.1	2	Pebble	Polyhedron	sub-angular	inner plan	medium-grained	2	P_25	One	Long	3 - Exhausted	Perpendicular	flake, bladelet	Conforti	3	3	Hard	528
3158	P25	Integer	Integer	15	4	3.75	2	Production	Bladelet	1-25	Lateral	Triangular	Twisted	Feather	flat	0	1-Unidirectional		Pisa	24	20	Radiolarite	46	39	23	58	1.1	2	Pebble	Polyhedron	sub-angular	inner plan	medium-grained	2	P_25	One	Long	3 - Exhausted	Perpendicular	flake, bladelet	Conforti	3	3	Hard	528
3161	P25	Integer	Integer	10	2	5	2	Production	Bladelet	26-50	Lateral back	Triangular	Twisted	Broken	flat	0	1-Unidirectional		Pisa	24	20	Radiolarite	46	39	23	58	1.1	2	Pebble	Polyhedron	sub-angular	inner plan	medium-grained	2	P_25	One	Long	3 - Exhausted	Perpendicular	flake, bladelet	Conforti	3	3	Hard	528
3160	P25	Integer	Integer	13	6	2.16667	2	Production	Bladelet	0		Triangular	Rectilinear	Broken	flat	0	1-Unidirectional		Pisa	24	20	Radiolarite	46	39	23	58	1.1	2	Pebble	Polyhedron	sub-angular	inner plan	medium-grained	2	P_25	One	Long	3 - Exhausted	Perpendicular	flake, bladelet	Conforti	3	3	Hard	528
3171	P26	Integer	Integer	10	4	2.5	0	Initialization	Bladelet	Total	Total	Linear	Rectilinear	Hinged	flat	0	Indet		Pisa	13	21	Radiolarite	50	37	23	61	1.3	2.1	Pebble	Polyhedron	angular	inner plan	medium-grained	1	P_26	One	Long	1 - Low	Perpendicular	flake, bladelet	Conforti	3	3	Hard	528
3174	P26	Integer	Integer	5	11	0.454545	1	Production	Flake	1-25	Lateral	Linear	Convex	Hinged	flat	0	1-Unidirectional		Pisa	13	21	Radiolarite	50	37	23	61	1.3	2.1	Pebble	Polyhedron	angular	inner plan	medium-grained	1	P_26	One	Long	1 - Low	Perpendicular	flake, bladelet	Conforti	3	3	Hard	528
3172	P26	Integer	Integer	10	7	1.42857	0	Production	Flake	1-25	Lateral	Linear	Rectilinear	Hinged	flat	0	1-Unidirectional		Pisa	13	21	Radiolarite	50	37	23	61	1.3	2.1	Pebble	Polyhedron	angular	inner plan	medium-grained	1	P_26	One	Long	1 - Low	Perpendicular	flake, bladelet	Conforti	3	3	Hard	528
3167	P26	Integer	Integer	37	16	2.3125	5	Initialization	Blade	76-99	Semi-total	Triangular	Wavy	Feather	flat	0	1-Unidirectional		Pisa	13	21	Radiolarite	50	37	23	61	1.3	2.1	Pebble	Polyhedron	angular	inner plan	medium-grained	1	P_26	One	Long	1 - Low	Perpendicular	flake, bladelet	Conforti	3	3	Hard	528
3170	P26	Fragmented	Meso-Proximal	14	7	2	2	Initialization	Bladelet	Total	Total	Irregular	Twisted	Broken	flat	0	Indet		Pisa	13	21	Radiolarite	50	37	23	61	1.3	2.1	Pebble	Polyhedron	angular	inner plan	medium-grained	1	P_26	One	Long	1 - Low	Perpendicular	flake, bladelet	Conforti	3	3	Hard	528
3169	P26	Integer	Integer	14	16	0.875	1	Initialization	Flake	Total	Total	Linear	Rectilinear	Feather	flat	0	Indet		Pisa	13	21	Radiolarite	50	37	23	61	1.3	2.1	Pebble	Polyhedron	angular	inner plan	medium-grained	1	P_26	One	Long	1 - Low	Perpendicular	flake, bladelet	Conforti	3	3	Hard	528
3168	P26	Integer	Integer	17	15	1.13333	4	Production	Flake	1-25	Proximal	Irregular	Concave	Hinged	flat	0	1-Unidirectional		Pisa	13	21	Radiolarite	50	37	23	61	1.3	2.1	Pebble	Polyhedron	angular	inner plan	medium-grained	1	P_26	One	Long	1 - Low	Perpendicular	flake, bladelet	Conforti	3	3	Hard	528
3175	P26	Fragmented	Meso-Proximal	11	3	3.66667	3	Production	Bladelet	1-25	Transversal	Triangular	Twisted	Broken	triangular prism	0	1-Unidirectional		Pisa	13	21	Radiolarite	50	37	23	61	1.3	2.1	Pebble	Polyhedron	angular	inner plan	medium-grained	1	P_26	One	Long	1 - Low	Perpendicular	flake, bladelet	Conforti	3	3	Hard	528
3163	P26	Integer	Integer	38	35	1.08571	20	Production	Core	51-75	Semi-total				flatparalelepiped	2	2-Bidirectional		Pisa	13	21	Radiolarite	50	37	23	61	1.3	2.1	Pebble	Polyhedron	angular	inner plan	medium-grained	1	P_26	One	Long	1 - Low	Perpendicular	flake, bladelet	Conforti	3	3	Hard	528
3164	P26	Integer	Integer	37	27	1.37037	8	Initialization	Flake	51-75	Semi-total	Irregular	Rectilinear	Feather	flat	0	2-Bidirectional		Pisa	13	21	Radiolarite	50	37	23	61	1.3	2.1	Pebble	Polyhedron	angular	inner plan	medium-grained	1	P_26	One	Long	1 - Low	Perpendicular	flake, bladelet	Conforti	3	3	Hard	528
3165	P26	Fragmented	Meso-Proximal	22	21	1.04762	2	Initialization	Flake	Total	Total	Linear	Rectilinear	Broken	flat	0	Indet		Pisa	13	21	Radiolarite	50	37	23	61	1.3	2.1	Pebble	Polyhedron	angular	inner plan	medium-grained	1	P_26	One	Long	1 - Low	Perpendicular	flake, bladelet	Conforti	3	3	Hard	528
3166	P26	Fragmented	Distal	8	14	0.571429	0	Initialization	Flake	Total	Total	Linear	Rectilinear	Feather	flat	0	Indet		Pisa	13	21	Radiolarite	50	37	23	61	1.3	2.1	Pebble	Polyhedron	angular	inner plan	medium-grained	1	P_26	One	Long	1 - Low	Perpendicular	flake, bladelet	Conforti	3	3	Hard	528
3173	P26	Integer	Integer	6	10	0.6	0	Production	Flake	0		Linear	Rectilinear	Hinged	flat	0	1-Unidirectional		Pisa	13	21	Radiolarite	50	37	23	61	1.3	2.1	Pebble	Polyhedron	angular	inner plan	medium-grained	1	P_26	One	Long	1 - Low	Perpendicular	flake, bladelet	Conforti	3	3	Hard	528
3212	P27	Integer	Integer	7	12	0.583333	2	Production	Flake	1-25	Proximal	Irregular	Rectilinear	Hinged	flat	0	Indet		Pisa	28	22	Radiolarite	55	38	23	76	1.4	2.3	Pebble	irregular	angular	inner plan	fine/medium-grained	1	P_27	One	Long	2 - Medium	Perpendicular	flake, bladelet	Conforti	3	3	Hard	528
3192	P27	Integer	Integer	16	20	0.8	2	Production	Flake	0		Linear	Rectilinear	Hinged	flat	0	Indet		Pisa	28	22	Radiolarite	55	38	23	76	1.4	2.3	Pebble	irregular	angular	inner plan	fine/medium-grained	1	P_27	One	Long	2 - Medium	Perpendicular	flake, bladelet	Conforti	3	3	Hard	528
3217	P27	Fragmented	Lateral	10	3	3.33333	2	Production	Flake	0		Irregular	Twisted	Feather	flat	0	Indet		Pisa	28	22	Radiolarite	55	38	23	76	1.4	2.3	Pebble	irregular	angular	inner plan	fine/medium-grained	1	P_27	One	Long	2 - Medium	Perpendicular	flake, bladelet	Conforti	3	3	Hard	528
3216	P27	Integer	Integer	6	11	0.545455	1	Production	Flake	0		Linear	Rectilinear	Feather	flat	0	1-Unidirectional		Pisa	28	22	Radiolarite	55	38	23	76	1.4	2.3	Pebble	irregular	angular	inner plan	fine/medium-grained	1	P_27	One	Long	2 - Medium	Perpendicular	flake, bladelet	Conforti	3	3	Hard	528
3215	P27	Integer	Integer	15	8	1.875	4	Production	Backed flake	26-50	Lateral back	Triangular	Rectilinear	Feather	flat	0	5-Perpendicular		Pisa	28	22	Radiolarite	55	38	23	76	1.4	2.3	Pebble	irregular	angular	inner plan	fine/medium-grained	1	P_27	One	Long	2 - Medium	Perpendicular	flake, bladelet	Conforti	3	3	Hard	528
3214	P27	Integer	Integer	9	12	0.75	2	Production	Flake	0		Linear	Rectilinear	Hinged	flat	0	1-Unidirectional		Pisa	28	22	Radiolarite	55	38	23	76	1.4	2.3	Pebble	irregular	angular	inner plan	fine/medium-grained	1	P_27	One	Long	2 - Medium	Perpendicular	flake, bladelet	Conforti	3	3	Hard	528
3213	P27	Integer	Integer	8	11	0.727273	3	Production	Backed flake	26-50	Lateral back	Irregular	Convex	Feather	flat	0	1-Unidirectional		Pisa	28	22	Radiolarite	55	38	23	76	1.4	2.3	Pebble	irregular	angular	inner plan	fine/medium-grained	1	P_27	One	Long	2 - Medium	Perpendicular	flake, bladelet	Conforti	3	3	Hard	528
3197	P27	Fragmented	Meso-Distal	15	11	1.36364	3	Initialization	Bladelet	Total	Total	Irregular	Rectilinear	Plunging	flat	0	Indet		Pisa	28	22	Radiolarite	55	38	23	76	1.4	2.3	Pebble	irregular	angular	inner plan	fine/medium-grained	1	P_27	One	Long	2 - Medium	Perpendicular	flake, bladelet	Conforti	3	3	Hard	528
3205	P27	Fragmented	Meso-Distal	11	4	2.75	0	Production	Bladelet	1-25	Lateral	Triangular	Rectilinear	Hinged	flat	0	1-Unidirectional		Pisa	28	22	Radiolarite	55	38	23	76	1.4	2.3	Pebble	irregular	angular	inner plan	fine/medium-grained	1	P_27	One	Long	2 - Medium	Perpendicular	flake, bladelet	Conforti	3	3	Hard	528
3204	P27	Fragmented	Meso-Distal	12	8	1.5	2	Production	Bladelet	51-75	Lateral	Triangular	Rectilinear	Feather	flat	0	1-Unidirectional		Pisa	28	22	Radiolarite	55	38	23	76	1.4	2.3	Pebble	irregular	angular	inner plan	fine/medium-grained	1	P_27	One	Long	2 - Medium	Perpendicular	flake, bladelet	Conforti	3	3	Hard	528
3203	P27	Fragmented	Meso-Distal	16	8	2	2	Initialization	Bladelet	51-75	Semi-total	Irregular	Rectilinear	Hinged	flat	0	1-Unidirectional		Pisa	28	22	Radiolarite	55	38	23	76	1.4	2.3	Pebble	irregular	angular	inner plan	fine/medium-grained	1	P_27	One	Long	2 - Medium	Perpendicular	flake, bladelet	Conforti	3	3	Hard	528
3202	P27	Integer	Integer	14	15	0.933333	2	Production	Flake	1-25	Lateral	Linear	Rectilinear	Hinged	flat	0	1-Unidirectional		Pisa	28	22	Radiolarite	55	38	23	76	1.4	2.3	Pebble	irregular	angular	inner plan	fine/medium-grained	1	P_27	One	Long	2 - Medium	Perpendicular	flake, bladelet	Conforti	3	3	Hard	528
3201	P27	Integer	Integer	17	11	1.54545	4	Initialization	Flake	Total	Total	Irregular	Convex	Feather	flat	0	Indet		Pisa	28	22	Radiolarite	55	38	23	76	1.4	2.3	Pebble	irregular	angular	inner plan	fine/medium-grained	1	P_27	One	Long	2 - Medium	Perpendicular	flake, bladelet	Conforti	3	3	Hard	528
3200	P27	Integer	Integer	26	8	3.25	3	Production	Bladelet	0		Triangular	Twisted	Hinged	flat	0	2-Bidirectional		Pisa	28	22	Radiolarite	55	38	23	76	1.4	2.3	Pebble	irregular	angular	inner plan	fine/medium-grained	1	P_27	One	Long	2 - Medium	Perpendicular	flake, bladelet	Conforti	3	3	Hard	528
3198	P27	Integer	Integer	16	19	0.842105	4	Production	Flake	0		Linear	Wavy	Hinged	flat	0	1-Unidirectional		Pisa	28	22	Radiolarite	55	38	23	76	1.4	2.3	Pebble	irregular	angular	inner plan	fine/medium-grained	1	P_27	One	Long	2 - Medium	Perpendicular	flake, bladelet	Conforti	3	3	Hard	528
3196	P27	Fragmented	Meso-Proximal	21	9	2.33333	3	Initialization	Bladelet	76-99	Semi-total	Irregular	Twisted	Broken	flat	0	Indet		Pisa	28	22	Radiolarite	55	38	23	76	1.4	2.3	Pebble	irregular	angular	inner plan	fine/medium-grained	1	P_27	One	Long	2 - Medium	Perpendicular	flake, bladelet	Conforti	3	3	Hard	528
3195	P27	Fragmented	Mesial	13	13	1	4	Production	Blade	51-75	Lateral	Triangular	Rectilinear	Broken	flat	0	1-Unidirectional		Pisa	28	22	Radiolarite	55	38	23	76	1.4	2.3	Pebble	irregular	angular	inner plan	fine/medium-grained	1	P_27	One	Long	2 - Medium	Perpendicular	flake, bladelet	Conforti	3	3	Hard	528
3207	P27	Integer	Integer	11	4	2.75	1	Production	Bladelet	0		Irregular	Twisted	Feather	flat	0	1-Unidirectional		Pisa	28	22	Radiolarite	55	38	23	76	1.4	2.3	Pebble	irregular	angular	inner plan	fine/medium-grained	1	P_27	One	Long	2 - Medium	Perpendicular	flake, bladelet	Conforti	3	3	Hard	528
3210	P27	Integer	Integer	11	6	1.83333	1	Production	Flake	0		Linear	Rectilinear	Feather	flat	0	1-Unidirectional		Pisa	28	22	Radiolarite	55	38	23	76	1.4	2.3	Pebble	irregular	angular	inner plan	fine/medium-grained	1	P_27	One	Long	2 - Medium	Perpendicular	flake, bladelet	Conforti	3	3	Hard	528
3199	P27	Integer	Integer	28	12	2.33333	3	Initialization	Bladelet	76-99	Semi-total	Irregular	Rectilinear	Feather	flat	0	1-Unidirectional		Pisa	28	22	Radiolarite	55	38	23	76	1.4	2.3	Pebble	irregular	angular	inner plan	fine/medium-grained	1	P_27	One	Long	2 - Medium	Perpendicular	flake, bladelet	Conforti	3	3	Hard	528
3208	P27	Integer	Integer	15	5	3	4	Production	Bladelet	0		Irregular	Wavy	Hinged	flat	0	5-Perpendicular		Pisa	28	22	Radiolarite	55	38	23	76	1.4	2.3	Pebble	irregular	angular	inner plan	fine/medium-grained	1	P_27	One	Long	2 - Medium	Perpendicular	flake, bladelet	Conforti	3	3	Hard	528
3194	P27	Fragmented	Meso-Proximal	25	13	1.92308	6	Production	Blade	51-75	Lateral	Triangular	Rectilinear	Broken	flat	0	1-Unidirectional		Pisa	28	22	Radiolarite	55	38	23	76	1.4	2.3	Pebble	irregular	angular	inner plan	fine/medium-grained	1	P_27	One	Long	2 - Medium	Perpendicular	flake, bladelet	Conforti	3	3	Hard	528
3206	P27	Fragmented	Meso-Distal	12	4	3	1	Production	Bladelet	0		Linear	Rectilinear	Feather	flat	0	1-Unidirectional		Pisa	28	22	Radiolarite	55	38	23	76	1.4	2.3	Pebble	irregular	angular	inner plan	fine/medium-grained	1	P_27	One	Long	2 - Medium	Perpendicular	flake, bladelet	Conforti	3	3	Hard	528
3190	P27	Integer	Integer	48	37	1.2973	18	Production	Core	26-50	Lateral				poligonal	3	2-Bidirectional		Pisa	28	22	Radiolarite	55	38	23	76	1.4	2.3	Pebble	irregular	angular	inner plan	fine/medium-grained	1	P_27	One	Long	2 - Medium	Perpendicular	flake, bladelet	Conforti	3	3	Hard	528
3191	P27	Integer	Integer	51	24	2.125	6	Initialization	Blade	Total	Total	Irregular	Rectilinear	Broken	flat	0	Indet		Pisa	28	22	Radiolarite	55	38	23	76	1.4	2.3	Pebble	irregular	angular	inner plan	fine/medium-grained	1	P_27	One	Long	2 - Medium	Perpendicular	flake, bladelet	Conforti	3	3	Hard	528
3193	P27	Integer	Integer	33	23	1.43478	8	Production	Flake	26-50	Lateral	Irregular	Convex	Feather	flat	0	1-Unidirectional		Pisa	28	22	Radiolarite	55	38	23	76	1.4	2.3	Pebble	irregular	angular	inner plan	fine/medium-grained	1	P_27	One	Long	2 - Medium	Perpendicular	flake, bladelet	Conforti	3	3	Hard	528
3211	P27	Integer	Integer	8	10	0.8	2	Production	Flake	1-25	Lateral	Irregular	Wavy	Feather	flat	0	1-Unidirectional		Pisa	28	22	Radiolarite	55	38	23	76	1.4	2.3	Pebble	irregular	angular	inner plan	fine/medium-grained	1	P_27	One	Long	2 - Medium	Perpendicular	flake, bladelet	Conforti	3	3	Hard	528
3209	P27	Integer	Integer	14	7	2	2	Production	Bladelet	0		Irregular	Rectilinear	Broken	flat	0	1-Unidirectional		Pisa	28	22	Radiolarite	55	38	23	76	1.4	2.3	Pebble	irregular	angular	inner plan	fine/medium-grained	1	P_27	One	Long	2 - Medium	Perpendicular	flake, bladelet	Conforti	3	3	Hard	528
3241	P28	Integer	Integer	6	12	0.5	2	Production	Flake	26-50	Lateral	Irregular	Rectilinear	Hinged	flat	0	1-Unidirectional		Pisa	29	38	Radiolarite	40	28	23	28	1.4	1.7	Pebble	irregular	angular	inner plan	medium-grained	1	P_28	Two	Long + Short	3 - Exhausted	Perpendicular	flake, bladelet	Lombardo	11	4	Hard	320
3237	P28	Integer	Integer	23	5	4.6	2	Production	Bladelet	0		Triangular	Rectilinear	Feather	flat	0	1-Unidirectional		Pisa	29	38	Radiolarite	40	28	23	28	1.4	1.7	Pebble	irregular	angular	inner plan	medium-grained	1	P_28	Two	Long + Short	3 - Exhausted	Perpendicular	flake, bladelet	Lombardo	11	4	Hard	320
3246	P28	Fragmented	Meso-Distal	11	5	2.2	1	Production	Bladelet	0		Irregular	Twisted	Feather	flat	0	1-Unidirectional		Pisa	29	38	Radiolarite	40	28	23	28	1.4	1.7	Pebble	irregular	angular	inner plan	medium-grained	1	P_28	Two	Long + Short	3 - Exhausted	Perpendicular	flake, bladelet	Lombardo	11	4	Hard	320
3245	P28	Integer	Integer	7	13	0.538462	2	Production	Flake	0		Irregular	Convex	Hinged	flat	0	1-Unidirectional		Pisa	29	38	Radiolarite	40	28	23	28	1.4	1.7	Pebble	irregular	angular	inner plan	medium-grained	1	P_28	Two	Long + Short	3 - Exhausted	Perpendicular	flake, bladelet	Lombardo	11	4	Hard	320
3244	P28	Integer	Integer	11	8	1.375	1	Production	Flake	0		Trapeze	Rectilinear	Feather	flat	0	1-Unidirectional		Pisa	29	38	Radiolarite	40	28	23	28	1.4	1.7	Pebble	irregular	angular	inner plan	medium-grained	1	P_28	Two	Long + Short	3 - Exhausted	Perpendicular	flake, bladelet	Lombardo	11	4	Hard	320
3243	P28	Fragmented	Meso-Distal	4	11	0.363636	1	Production	Flake	0		Irregular	Rectilinear	Broken	flat	0	1-Unidirectional		Pisa	29	38	Radiolarite	40	28	23	28	1.4	1.7	Pebble	irregular	angular	inner plan	medium-grained	1	P_28	Two	Long + Short	3 - Exhausted	Perpendicular	flake, bladelet	Lombardo	11	4	Hard	320
3242	P28	Integer	Integer	6	11	0.545455	1	Production	Flake	0		Irregular	Rectilinear	Hinged	flat	0	1-Unidirectional		Pisa	29	38	Radiolarite	40	28	23	28	1.4	1.7	Pebble	irregular	angular	inner plan	medium-grained	1	P_28	Two	Long + Short	3 - Exhausted	Perpendicular	flake, bladelet	Lombardo	11	4	Hard	320
3229	P28	Integer	Integer	14	11	1.27273	5	Initialization	Flake	51-75	Semi-total	Triangular	Rectilinear	Hinged	flat	0	1-Unidirectional		Pisa	29	38	Radiolarite	40	28	23	28	1.4	1.7	Pebble	irregular	angular	inner plan	medium-grained	1	P_28	Two	Long + Short	3 - Exhausted	Perpendicular	flake, bladelet	Lombardo	11	4	Hard	320
3218	P28	Integer	Integer	18	12	1.5	6	Production	Flake	51-75	Semi-total	Irregular	Rectilinear	Plunging	flat	0	1-Unidirectional		Pisa	29	38	Radiolarite	40	28	23	28	1.4	1.7	Pebble	irregular	angular	inner plan	medium-grained	1	P_28	Two	Long + Short	3 - Exhausted	Perpendicular	flake, bladelet	Lombardo	11	4	Hard	320
3219	P28	Integer	Integer	24	14	1.71429	7	Production	Backed flake	26-50	Lateral back	Trapeze	Rectilinear	Broken	flat	0	2-Bidirectional		Pisa	29	38	Radiolarite	40	28	23	28	1.4	1.7	Pebble	irregular	angular	inner plan	medium-grained	1	P_28	Two	Long + Short	3 - Exhausted	Perpendicular	flake, bladelet	Lombardo	11	4	Hard	320
3220	P28	Fragmented	Meso-Distal	22	22	1	10	Production	Backed flake	1-25	Lateral back	Irregular	Wavy	Plunging	flatparalelepiped	0	2-Bidirectional		Pisa	29	38	Radiolarite	40	28	23	28	1.4	1.7	Pebble	irregular	angular	inner plan	medium-grained	1	P_28	Two	Long + Short	3 - Exhausted	Perpendicular	flake, bladelet	Lombardo	11	4	Hard	320
3221	P28	Integer	Integer	27	20	1.35	5	Production	Flake	1-25	Lateral	Irregular	Rectilinear	Feather	flat	0	2-Bidirectional		Pisa	29	38	Radiolarite	40	28	23	28	1.4	1.7	Pebble	irregular	angular	inner plan	medium-grained	1	P_28	Two	Long + Short	3 - Exhausted	Perpendicular	flake, bladelet	Lombardo	11	4	Hard	320
3222	P28	Fragmented	Meso-Proximal	31	21	1.47619	4	Initialization	Flake	76-99	Semi-total	Linear	Rectilinear	Broken	flat	0	1-Unidirectional		Pisa	29	38	Radiolarite	40	28	23	28	1.4	1.7	Pebble	irregular	angular	inner plan	medium-grained	1	P_28	Two	Long + Short	3 - Exhausted	Perpendicular	flake, bladelet	Lombardo	11	4	Hard	320
3223	P28	Fragmented	Distal	9	13	0.692308	3	Initialization	Flake	Total	Total	Linear	Twisted	Plunging	flat	0	Indet		Pisa	29	38	Radiolarite	40	28	23	28	1.4	1.7	Pebble	irregular	angular	inner plan	medium-grained	1	P_28	Two	Long + Short	3 - Exhausted	Perpendicular	flake, bladelet	Lombardo	11	4	Hard	320
3224	P28	Fragmented	Meso-Proximal	28	17	1.64706	3	Initialization	Flake	76-99	Semi-total	Linear	Twisted	Feather	flat	0	1-Unidirectional		Pisa	29	38	Radiolarite	40	28	23	28	1.4	1.7	Pebble	irregular	angular	inner plan	medium-grained	1	P_28	Two	Long + Short	3 - Exhausted	Perpendicular	flake, bladelet	Lombardo	11	4	Hard	320
3225	P28	Fragmented	Distal	11	10	1.1	1	Initialization	Flake	51-75	Semi-total	Linear	Rectilinear	Feather	flat	0	2-Bidirectional		Pisa	29	38	Radiolarite	40	28	23	28	1.4	1.7	Pebble	irregular	angular	inner plan	medium-grained	1	P_28	Two	Long + Short	3 - Exhausted	Perpendicular	flake, bladelet	Lombardo	11	4	Hard	320
3226	P28	Integer	Integer	16	12	1.33333	3	Production	Flake	1-25	Lateral	Irregular	Rectilinear	Hinged	flat	0	1-Unidirectional		Pisa	29	38	Radiolarite	40	28	23	28	1.4	1.7	Pebble	irregular	angular	inner plan	medium-grained	1	P_28	Two	Long + Short	3 - Exhausted	Perpendicular	flake, bladelet	Lombardo	11	4	Hard	320
3239	P28	Integer	Integer	13	1	13	1	Production	Bladelet	26-50	Lateral back	Triangular	Rectilinear	Broken	flat	0	Indet		Pisa	29	38	Radiolarite	40	28	23	28	1.4	1.7	Pebble	irregular	angular	inner plan	medium-grained	1	P_28	Two	Long + Short	3 - Exhausted	Perpendicular	flake, bladelet	Lombardo	11	4	Hard	320
3228	P28	Integer	Integer	9	11	0.818182	12	Production	Core	26-50	Proximal	Irregular			poligonal	2	3-Orthogonal		Pisa	29	38	Radiolarite	40	28	23	28	1.4	1.7	Pebble	irregular	angular	inner plan	medium-grained	1	P_28	Two	Long + Short	3 - Exhausted	Perpendicular	flake, bladelet	Lombardo	11	4	Hard	320
3240	P28	Fragmented	Meso-Distal	15	3	5	2	Production	Bladelet	0		Triangular	Twisted	Feather	flat	0	1-Unidirectional		Pisa	29	38	Radiolarite	40	28	23	28	1.4	1.7	Pebble	irregular	angular	inner plan	medium-grained	1	P_28	Two	Long + Short	3 - Exhausted	Perpendicular	flake, bladelet	Lombardo	11	4	Hard	320
3230	P28	Fragmented	Meso-Distal	10	17	0.588235	2	Production	Flake	1-25	Lateral	Linear	Rectilinear	Hinged	flat	0	1-Unidirectional		Pisa	29	38	Radiolarite	40	28	23	28	1.4	1.7	Pebble	irregular	angular	inner plan	medium-grained	1	P_28	Two	Long + Short	3 - Exhausted	Perpendicular	flake, bladelet	Lombardo	11	4	Hard	320
3231	P28	Integer	Integer	10	16	0.625	1	Production	Flake	0		Linear	Rectilinear	Feather	flat	0	1-Unidirectional		Pisa	29	38	Radiolarite	40	28	23	28	1.4	1.7	Pebble	irregular	angular	inner plan	medium-grained	1	P_28	Two	Long + Short	3 - Exhausted	Perpendicular	flake, bladelet	Lombardo	11	4	Hard	320
3232	P28	Integer	Integer	13	8	1.625	3	Production	Flake	0		Triangular	Rectilinear	Hinged	flat	0	1-Unidirectional		Pisa	29	38	Radiolarite	40	28	23	28	1.4	1.7	Pebble	irregular	angular	inner plan	medium-grained	1	P_28	Two	Long + Short	3 - Exhausted	Perpendicular	flake, bladelet	Lombardo	11	4	Hard	320
3233	P28	Fragmented	Meso-Distal	16	6	2.66667	2	Production	Bladelet	0		Triangular	Rectilinear	Feather	flat	0	1-Unidirectional		Pisa	29	38	Radiolarite	40	28	23	28	1.4	1.7	Pebble	irregular	angular	inner plan	medium-grained	1	P_28	Two	Long + Short	3 - Exhausted	Perpendicular	flake, bladelet	Lombardo	11	4	Hard	320
3234	P28	Fragmented	Meso-Proximal	13	4	3.25	2	Initialization	Bladelet	51-75	Semi-total	Irregular	Rectilinear	Broken	flat	0	1-Unidirectional		Pisa	29	38	Radiolarite	40	28	23	28	1.4	1.7	Pebble	irregular	angular	inner plan	medium-grained	1	P_28	Two	Long + Short	3 - Exhausted	Perpendicular	flake, bladelet	Lombardo	11	4	Hard	320
3235	P28	Fragmented	Mesial	17	4	4.25	2	Production	Bladelet	0		Irregular	Twisted	Broken	flat	0	1-Unidirectional		Pisa	29	38	Radiolarite	40	28	23	28	1.4	1.7	Pebble	irregular	angular	inner plan	medium-grained	1	P_28	Two	Long + Short	3 - Exhausted	Perpendicular	flake, bladelet	Lombardo	11	4	Hard	320
3236	P28	Fragmented	Meso-Distal	22	3	7.33333	2	Initialization	Bladelet	51-75	Semi-total	Triangular	Rectilinear	Plunging	flat	0	1-Unidirectional		Pisa	29	38	Radiolarite	40	28	23	28	1.4	1.7	Pebble	irregular	angular	inner plan	medium-grained	1	P_28	Two	Long + Short	3 - Exhausted	Perpendicular	flake, bladelet	Lombardo	11	4	Hard	320
3238	P28	Fragmented	Meso-Distal	5	11	0.454545	0	Production	Flake	1-25	Distal	Irregular	Rectilinear	Feather	flat	0	1-Unidirectional		Pisa	29	38	Radiolarite	40	28	23	28	1.4	1.7	Pebble	irregular	angular	inner plan	medium-grained	1	P_28	Two	Long + Short	3 - Exhausted	Perpendicular	flake, bladelet	Lombardo	11	4	Hard	320
3227	P28	Integer	Integer	12	15	0.8	3	Production	Backed flake	26-50	Lateral back	Irregular	Rectilinear	Hinged	flat	0	2-Bidirectional		Pisa	29	38	Radiolarite	40	28	23	28	1.4	1.7	Pebble	irregular	angular	inner plan	medium-grained	1	P_28	Two	Long + Short	3 - Exhausted	Perpendicular	flake, bladelet	Lombardo	11	4	Hard	320
3260	P29	Fragmented	Composite	11	8	1.375	5	Initialization	Flake	51-75	Semi-total	Irregular	Rectilinear	Broken	flat	0	Indet		Pisa	19	46	Quartz + Quartzite	38	23	18	15	1.6	2.1	Pebble	Polyhedron	angular	inner plan	fine/medium-grained	1	P_29	One	Long	3 - Exhausted	Perpendicular	flake, bladelet	Conforti	8	4	Soft	547
3265	P29	Fragmented	Distal	7	10	0.7	2	Initialization	Flake	51-75	Semi-total	Irregular	Twisted	Feather	flat	0	1-Unidirectional		Pisa	19	46	Quartz + Quartzite	38	23	18	15	1.6	2.1	Pebble	Polyhedron	angular	inner plan	fine/medium-grained	1	P_29	One	Long	3 - Exhausted	Perpendicular	flake, bladelet	Conforti	8	4	Soft	547
3261	P29	Fragmented	Meso-Proximal	11	7	1.57143	3	Production	Bladelet	0		Irregular	Rectilinear	Broken	flat	0	1-Unidirectional		Pisa	19	46	Quartz + Quartzite	38	23	18	15	1.6	2.1	Pebble	Polyhedron	angular	inner plan	fine/medium-grained	1	P_29	One	Long	3 - Exhausted	Perpendicular	flake, bladelet	Conforti	8	4	Soft	547
3264	P29	Fragmented	Meso-Proximal	10	7	1.42857	2	Production	Flake	0		Irregular	Rectilinear	Broken	flat	0	2-Bidirectional		Pisa	19	46	Quartz + Quartzite	38	23	18	15	1.6	2.1	Pebble	Polyhedron	angular	inner plan	fine/medium-grained	1	P_29	One	Long	3 - Exhausted	Perpendicular	flake, bladelet	Conforti	8	4	Soft	547
3258	P29	Integer	Integer	12	3	4	2	Production	Bladelet	0		Irregular	Twisted	Broken	flat	0	2-Bidirectional		Pisa	19	46	Quartz + Quartzite	38	23	18	15	1.6	2.1	Pebble	Polyhedron	angular	inner plan	fine/medium-grained	1	P_29	One	Long	3 - Exhausted	Perpendicular	flake, bladelet	Conforti	8	4	Soft	547
3259	P29	Fragmented	Composite	10	6	1.66667	3	Initialization	Flake	Total	Total	Irregular	Convex	Feather	flat	0	Indet		Pisa	19	46	Quartz + Quartzite	38	23	18	15	1.6	2.1	Pebble	Polyhedron	angular	inner plan	fine/medium-grained	1	P_29	One	Long	3 - Exhausted	Perpendicular	flake, bladelet	Conforti	8	4	Soft	547
3262	P29	Fragmented	Meso-Distal	10	6	1.66667	2	Production	Flake	1-25	Lateral	Triangular	Twisted	Feather	flat	0	2-Bidirectional		Pisa	19	46	Quartz + Quartzite	38	23	18	15	1.6	2.1	Pebble	Polyhedron	angular	inner plan	fine/medium-grained	1	P_29	One	Long	3 - Exhausted	Perpendicular	flake, bladelet	Conforti	8	4	Soft	547
3256	P29	Integer	Integer	11	6	1.83333	2	Initialization	Flake	76-99	Semi-total	Irregular	Rectilinear	Feather	flat	0	1-Unidirectional		Pisa	19	46	Quartz + Quartzite	38	23	18	15	1.6	2.1	Pebble	Polyhedron	angular	inner plan	fine/medium-grained	1	P_29	One	Long	3 - Exhausted	Perpendicular	flake, bladelet	Conforti	8	4	Soft	547
3255	P29	Integer	Integer	12	3	4	1	Production	Bladelet	26-50	Lateral	Triangular	Twisted	Feather	flat	0	1-Unidirectional		Pisa	19	46	Quartz + Quartzite	38	23	18	15	1.6	2.1	Pebble	Polyhedron	angular	inner plan	fine/medium-grained	1	P_29	One	Long	3 - Exhausted	Perpendicular	flake, bladelet	Conforti	8	4	Soft	547
3254	P29	Fragmented	Distal	10	4	2.5	2	Initialization	Bladelet	51-75	Semi-total	Trapeze	Twisted	Feather	flat	0	2-Bidirectional		Pisa	19	46	Quartz + Quartzite	38	23	18	15	1.6	2.1	Pebble	Polyhedron	angular	inner plan	fine/medium-grained	1	P_29	One	Long	3 - Exhausted	Perpendicular	flake, bladelet	Conforti	8	4	Soft	547
3252	P29	Fragmented	Lateral	18	9	2	3	Production	Flake	26-50	Lateral	Irregular	Rectilinear	Feather	flat	0	2-Bidirectional		Pisa	19	46	Quartz + Quartzite	38	23	18	15	1.6	2.1	Pebble	Polyhedron	angular	inner plan	fine/medium-grained	1	P_29	One	Long	3 - Exhausted	Perpendicular	flake, bladelet	Conforti	8	4	Soft	547
3251	P29	Integer	Integer	19	7	2.71429	4	Production	Bladelet	0		Trapeze	Rectilinear	Plunging	flat	0	2-Bidirectional		Pisa	19	46	Quartz + Quartzite	38	23	18	15	1.6	2.1	Pebble	Polyhedron	angular	inner plan	fine/medium-grained	1	P_29	One	Long	3 - Exhausted	Perpendicular	flake, bladelet	Conforti	8	4	Soft	547
3263	P29	Fragmented	Meso-Proximal	9	10	0.9	2	Initialization	Flake	Total	Total	Irregular	Twisted	Broken	flat	0	Indet		Pisa	19	46	Quartz + Quartzite	38	23	18	15	1.6	2.1	Pebble	Polyhedron	angular	inner plan	fine/medium-grained	1	P_29	One	Long	3 - Exhausted	Perpendicular	flake, bladelet	Conforti	8	4	Soft	547
3250	P29	Fragmented	Meso-Proximal	24	6	4	3	Production	Bladelet	26-50	Lateral back	Trapeze	Rectilinear	Broken	flat	0	1-Unidirectional		Pisa	19	46	Quartz + Quartzite	38	23	18	15	1.6	2.1	Pebble	Polyhedron	angular	inner plan	fine/medium-grained	1	P_29	One	Long	3 - Exhausted	Perpendicular	flake, bladelet	Conforti	8	4	Soft	547
3249	P29	Integer	Integer	31	5	6.2	3	Initialization	Bladelet	Total	Total	Irregular	Rectilinear	Feather	flat	0	Indet		Pisa	19	46	Quartz + Quartzite	38	23	18	15	1.6	2.1	Pebble	Polyhedron	angular	inner plan	fine/medium-grained	1	P_29	One	Long	3 - Exhausted	Perpendicular	flake, bladelet	Conforti	8	4	Soft	547
3253	P29	Fragmented	Proximal	12	7	1.71429	4	Production	Bladelet	1-25	Lateral back	Triangular	Rectilinear	Broken	flat	0	1-Unidirectional		Pisa	19	46	Quartz + Quartzite	38	23	18	15	1.6	2.1	Pebble	Polyhedron	angular	inner plan	fine/medium-grained	1	P_29	One	Long	3 - Exhausted	Perpendicular	flake, bladelet	Conforti	8	4	Soft	547
3247	P29	Integer	Integer	17	12	1.41667	7	Production	Core	26-50	Transversal				flatparalelepiped	1	2-Bidirectional		Pisa	19	46	Quartz + Quartzite	38	23	18	15	1.6	2.1	Pebble	Polyhedron	angular	inner plan	fine/medium-grained	1	P_29	One	Long	3 - Exhausted	Perpendicular	flake, bladelet	Conforti	8	4	Soft	547
3257	P29	Fragmented	Lateral	12	4	3	3	Production	Flake	0		Irregular	Rectilinear	Hinged	flat	0	2-Bidirectional		Pisa	19	46	Quartz + Quartzite	38	23	18	15	1.6	2.1	Pebble	Polyhedron	angular	inner plan	fine/medium-grained	1	P_29	One	Long	3 - Exhausted	Perpendicular	flake, bladelet	Conforti	8	4	Soft	547
3248	P29	Integer	Integer	28	13	2.15385	6	Initialization	Blade	76-99	Semi-total	Irregular	Rectilinear	Feather	flat	0	2-Bidirectional		Pisa	19	46	Quartz + Quartzite	38	23	18	15	1.6	2.1	Pebble	Polyhedron	angular	inner plan	fine/medium-grained	1	P_29	One	Long	3 - Exhausted	Perpendicular	flake, bladelet	Conforti	8	4	Soft	547
65	P3	Integer	Integer	34	8	4.25	5	Initialization	Bladelet	51-75	Lateral	Triangular	Rectilinear	Plunging	flat	0	2-Bidirectional		Pisa	24	66 (24)	Radiolarite	35	53	20	52	0.6	1.7	Core	Polyhedron	angular	inner plan	fine/medium-grained	2	P_3	One	Long	2 - Medium	Perpendicular	flake, bladelet	Lombardo	20-18-19	4
69	P3	Fragmented	Meso-Proximal	32	14	2.28571	3	Production	Blade	0		Triangular	Rectilinear	Broken	flat	0	2-Bidirectional		Pisa	24	66 (24)	Radiolarite	35	53	20	52	0.6	1.7	Core	Polyhedron	angular	inner plan	fine/medium-grained	2	P_3	One	Long	2 - Medium	Perpendicular	flake, bladelet	Lombardo	20-18-19	4
68	P3	Integer	Integer	27	9	3	4	Initialization	Bladelet	51-75	Lateral	Triangular	Rectilinear	Broken	flat	0	1-Unidirectional		Pisa	24	66 (24)	Radiolarite	35	53	20	52	0.6	1.7	Core	Polyhedron	angular	inner plan	fine/medium-grained	2	P_3	One	Long	2 - Medium	Perpendicular	flake, bladelet	Lombardo	20-18-19	4
66	P3	Integer	Integer	43	14	3.07143	6	Initialization	Blade	51-75	Lateral	Triangular	Rectilinear	Plunging	flat	0	1-Unidirectional		Pisa	24	66 (24)	Radiolarite	35	53	20	52	0.6	1.7	Core	Polyhedron	angular	inner plan	fine/medium-grained	2	P_3	One	Long	2 - Medium	Perpendicular	flake, bladelet	Lombardo	20-18-19	4
81	P3	Integer	Integer	12	5	2.4	2	Initialization	Flake	76-99	Semi-total	Linear	Rectilinear	Plunging	flat	0	1-Unidirectional		Pisa	24	66 (24)	Radiolarite	35	53	20	52	0.6	1.7	Core	Polyhedron	angular	inner plan	fine/medium-grained	2	P_3	One	Long	2 - Medium	Perpendicular	flake, bladelet	Lombardo	20-18-19	4
72	P3	Fragmented	Proximal	13	12	1.08333	7	Initialization	Flake	76-99	Semi-total	Irregular	Rectilinear	Broken	flat	0	1-Unidirectional		Pisa	24	66 (24)	Radiolarite	35	53	20	52	0.6	1.7	Core	Polyhedron	angular	inner plan	fine/medium-grained	2	P_3	One	Long	2 - Medium	Perpendicular	flake, bladelet	Lombardo	20-18-19	4
67	P3	Integer	Integer	44	18	2.44444	7	Production	Blade	0		Irregular	Rectilinear	Plunging	flat	0	2-Bidirectional		Pisa	24	66 (24)	Radiolarite	35	53	20	52	0.6	1.7	Core	Polyhedron	angular	inner plan	fine/medium-grained	2	P_3	One	Long	2 - Medium	Perpendicular	flake, bladelet	Lombardo	20-18-19	4
58	P3	Integer	Integer	25	16	1.5625	4	Final	Core	0		Linear	Rectilinear		flatparalelepiped	2	2-Bidirectional		Pisa	24	66 (24)	Radiolarite	35	53	20	52	0.6	1.7	Core	Polyhedron	angular	inner plan	fine/medium-grained	2	P_3	One	Long	2 - Medium	Perpendicular	flake, bladelet	Lombardo	20-18-19	4
80	P3	Integer	Integer	12	6	2	1	Production	Flake	0		Linear	Rectilinear	Feather	flat	0	1-Unidirectional		Pisa	24	66 (24)	Radiolarite	35	53	20	52	0.6	1.7	Core	Polyhedron	angular	inner plan	fine/medium-grained	2	P_3	One	Long	2 - Medium	Perpendicular	flake, bladelet	Lombardo	20-18-19	4
64	P3	Fragmented	Mesial	12	3	4	1	Initialization	Bladelet	26-50	Lateral	Triangular	Rectilinear	Broken	flat	0	1-Unidirectional		Pisa	24	66 (24)	Radiolarite	35	53	20	52	0.6	1.7	Core	Polyhedron	angular	inner plan	fine/medium-grained	2	P_3	One	Long	2 - Medium	Perpendicular	flake, bladelet	Lombardo	20-18-19	4
63	P3	Integer	Integer	15	5	3	2	Initialization	Bladelet	76-99	Semi-total	Triangular	Rectilinear	Hinged	flat	0	1-Unidirectional		Pisa	24	66 (24)	Radiolarite	35	53	20	52	0.6	1.7	Core	Polyhedron	angular	inner plan	fine/medium-grained	2	P_3	One	Long	2 - Medium	Perpendicular	flake, bladelet	Lombardo	20-18-19	4
62	P3	Integer	Integer	23	13	1.76923	3	Initialization	Backed flake	26-50	Lateral back	Triangular	Twisted	Feather	flat	0	1-Unidirectional		Pisa	24	66 (24)	Radiolarite	35	53	20	52	0.6	1.7	Core	Polyhedron	angular	inner plan	fine/medium-grained	2	P_3	One	Long	2 - Medium	Perpendicular	flake, bladelet	Lombardo	20-18-19	4
61	P3	Integer	Integer	35	18	1.94444	4	Production	Backed flake	1-25	Lateral back	Triangular	Rectilinear	Broken	flat	0	1-Unidirectional		Pisa	24	66 (24)	Radiolarite	35	53	20	52	0.6	1.7	Core	Polyhedron	angular	inner plan	fine/medium-grained	2	P_3	One	Long	2 - Medium	Perpendicular	flake, bladelet	Lombardo	20-18-19	4
70	P3	Integer	Integer	20	10	2	2	Initialization	Backed flake	1-25	Lateral back	Triangular	Rectilinear	Feather	flat	0	2-Bidirectional		Pisa	24	66 (24)	Radiolarite	35	53	20	52	0.6	1.7	Core	Polyhedron	angular	inner plan	fine/medium-grained	2	P_3	One	Long	2 - Medium	Perpendicular	flake, bladelet	Lombardo	20-18-19	4
59	P3	Integer	Integer	41	12	3.41667	9	Final	Core	0		Rectangular Trapeze	Rectilinear		flatparalelepiped	2	2-Bidirectional		Pisa	24	66 (24)	Radiolarite	35	53	20	52	0.6	1.7	Core	Polyhedron	angular	inner plan	fine/medium-grained	2	P_3	One	Long	2 - Medium	Perpendicular	flake, bladelet	Lombardo	20-18-19	4
71	P3	Fragmented	Proximal	9	6	1.5	3	Initialization	Backed flake	1-25	Lateral back	Linear	Rectilinear	Broken	flat	0	1-Unidirectional		Pisa	24	66 (24)	Radiolarite	35	53	20	52	0.6	1.7	Core	Polyhedron	angular	inner plan	fine/medium-grained	2	P_3	One	Long	2 - Medium	Perpendicular	flake, bladelet	Lombardo	20-18-19	4
79	P3	Fragmented	Mesial	11	5	2.2	1	Initialization	Flake	76-99	Semi-total	Linear	Rectilinear	Broken	flat	0	Indet		Pisa	24	66 (24)	Radiolarite	35	53	20	52	0.6	1.7	Core	Polyhedron	angular	inner plan	fine/medium-grained	2	P_3	One	Long	2 - Medium	Perpendicular	flake, bladelet	Lombardo	20-18-19	4
78	P3	Fragmented	Mesial	13	9	1.44444	2	Initialization	Flake	Total	Total	Linear	Rectilinear	Broken	flat	0	Indet		Pisa	24	66 (24)	Radiolarite	35	53	20	52	0.6	1.7	Core	Polyhedron	angular	inner plan	fine/medium-grained	2	P_3	One	Long	2 - Medium	Perpendicular	flake, bladelet	Lombardo	20-18-19	4
77	P3	Integer	Integer	14	7	2	3	Initialization	Backed flake	26-50	Lateral back	Triangular	Rectilinear	Feather	flat	0	1-Unidirectional		Pisa	24	66 (24)	Radiolarite	35	53	20	52	0.6	1.7	Core	Polyhedron	angular	inner plan	fine/medium-grained	2	P_3	One	Long	2 - Medium	Perpendicular	flake, bladelet	Lombardo	20-18-19	4
76	P3	Fragmented	Meso-Proximal	12	12	1	1	Production	Flake	0		Linear	Rectilinear	Broken	flat	0	4-Multidirectional		Pisa	24	66 (24)	Radiolarite	35	53	20	52	0.6	1.7	Core	Polyhedron	angular	inner plan	fine/medium-grained	2	P_3	One	Long	2 - Medium	Perpendicular	flake, bladelet	Lombardo	20-18-19	4
75	P3	Fragmented	Meso-Distal	19	10	1.9	1	Production	Flake	0		Linear	Rectilinear	Feather	flat	0	1-Unidirectional		Pisa	24	66 (24)	Radiolarite	35	53	20	52	0.6	1.7	Core	Polyhedron	angular	inner plan	fine/medium-grained	2	P_3	One	Long	2 - Medium	Perpendicular	flake, bladelet	Lombardo	20-18-19	4
74	P3	Integer	Integer	10	11	0.909091	2	Production	Backed flake	1-25	Lateral back	Linear	Rectilinear	Feather	flat	0	1-Unidirectional		Pisa	24	66 (24)	Radiolarite	35	53	20	52	0.6	1.7	Core	Polyhedron	angular	inner plan	fine/medium-grained	2	P_3	One	Long	2 - Medium	Perpendicular	flake, bladelet	Lombardo	20-18-19	4
73	P3	Integer	Integer	16	8	2	2	Initialization	Flake	26-50	Lateral	Triangular	Rectilinear	Feather	flat	0	1-Unidirectional		Pisa	24	66 (24)	Radiolarite	35	53	20	52	0.6	1.7	Core	Polyhedron	angular	inner plan	fine/medium-grained	2	P_3	One	Long	2 - Medium	Perpendicular	flake, bladelet	Lombardo	20-18-19	4
60	P3	Integer	Integer	42	16	2.625	14	Initialization	Flake	76-99	Semi-total	Trapeze	Rectilinear	Plunging	flat	0	2-Bidirectional		Pisa	24	66 (24)	Radiolarite	35	53	20	52	0.6	1.7	Core	Polyhedron	angular	inner plan	fine/medium-grained	2	P_3	One	Long	2 - Medium	Perpendicular	flake, bladelet	Lombardo	20-18-19	4
3310	P30	Fragmented	Lateral	11	4	2.75	2	Initialization	Flake	76-99	Semi-total	Irregular	Twisted	Feather	flat	0	2-Bidirectional		Pisa	48	47	Quartz + Quartzite	46	32	29	43	1.4	1.5	Pebble	Polyhedron	angular	inner plan	fine/medium-grained	2	P_30	One	Long	3 - Exhausted	Perpendicular	flake, bladelet	Conforti	14	4	Soft	493
3282	P30	Fragmented	Lateral	17	10	1.7	8	Initialization	Flake	51-75	Semi-total	Irregular	Convex	Plunging	flat	0	1-Unidirectional		Pisa	48	47	Quartz + Quartzite	46	32	29	43	1.4	1.5	Pebble	Polyhedron	angular	inner plan	fine/medium-grained	2	P_30	One	Long	3 - Exhausted	Perpendicular	flake, bladelet	Conforti	14	4	Soft	493
3313	P30	Integer	Integer	10	7	1.42857	2	Production	Flake	26-50	Lateral	Irregular	Rectilinear	Feather	flat	0	2-Bidirectional		Pisa	48	47	Quartz + Quartzite	46	32	29	43	1.4	1.5	Pebble	Polyhedron	angular	inner plan	fine/medium-grained	2	P_30	One	Long	3 - Exhausted	Perpendicular	flake, bladelet	Conforti	14	4	Soft	493
3312	P30	Fragmented	Mesial	7	11	0.636364	2	Production	Flake	0		Triangular	Rectilinear	Broken	flat	0	2-Bidirectional		Pisa	48	47	Quartz + Quartzite	46	32	29	43	1.4	1.5	Pebble	Polyhedron	angular	inner plan	fine/medium-grained	2	P_30	One	Long	3 - Exhausted	Perpendicular	flake, bladelet	Conforti	14	4	Soft	493
3311	P30	Integer	Integer	11	8	1.375	2	Production	Flake	0		Linear	Rectilinear	Feather	flat	0	2-Bidirectional		Pisa	48	47	Quartz + Quartzite	46	32	29	43	1.4	1.5	Pebble	Polyhedron	angular	inner plan	fine/medium-grained	2	P_30	One	Long	3 - Exhausted	Perpendicular	flake, bladelet	Conforti	14	4	Soft	493
3274	P30	Integer	Integer	14	8	1.75	4	Production	Flake	0		Trapeze	Rectilinear	Feather	flat	0	2-Bidirectional		Pisa	48	47	Quartz + Quartzite	46	32	29	43	1.4	1.5	Pebble	Polyhedron	angular	inner plan	fine/medium-grained	2	P_30	One	Long	3 - Exhausted	Perpendicular	flake, bladelet	Conforti	14	4	Soft	493
3284	P30	Integer	Integer	7	14	0.5	3	Production	Flake	1-25	Transversal	Irregular	Convex	Hinged	flat	0	1-Unidirectional		Pisa	48	47	Quartz + Quartzite	46	32	29	43	1.4	1.5	Pebble	Polyhedron	angular	inner plan	fine/medium-grained	2	P_30	One	Long	3 - Exhausted	Perpendicular	flake, bladelet	Conforti	14	4	Soft	493
3285	P30	Integer	Integer	12	12	1	4	Initialization	Flake	76-99	Semi-total	Irregular	Convex	Broken	flat	0	Indet		Pisa	48	47	Quartz + Quartzite	46	32	29	43	1.4	1.5	Pebble	Polyhedron	angular	inner plan	fine/medium-grained	2	P_30	One	Long	3 - Exhausted	Perpendicular	flake, bladelet	Conforti	14	4	Soft	493
3283	P30	Fragmented	Composite	14	11	1.27273	8	Production	Backed flake	26-50	Lateral back	Irregular	Concave	Feather	flat	0	2-Bidirectional		Pisa	48	47	Quartz + Quartzite	46	32	29	43	1.4	1.5	Pebble	Polyhedron	angular	inner plan	fine/medium-grained	2	P_30	One	Long	3 - Exhausted	Perpendicular	flake, bladelet	Conforti	14	4	Soft	493
3281	P30	Fragmented	Composite	18	14	1.28571	8	Production	Flake	1-25	Transversal	Irregular	Convex	Feather	flat	0	2-Bidirectional		Pisa	48	47	Quartz + Quartzite	46	32	29	43	1.4	1.5	Pebble	Polyhedron	angular	inner plan	fine/medium-grained	2	P_30	One	Long	3 - Exhausted	Perpendicular	flake, bladelet	Conforti	14	4	Soft	493
3280	P30	Fragmented	Lateral	13	13	1	6	Initialization	Flake	76-99	Semi-total	Irregular	Rectilinear	Feather	flat	0	1-Unidirectional		Pisa	48	47	Quartz + Quartzite	46	32	29	43	1.4	1.5	Pebble	Polyhedron	angular	inner plan	fine/medium-grained	2	P_30	One	Long	3 - Exhausted	Perpendicular	flake, bladelet	Conforti	14	4	Soft	493
3279	P30	Fragmented	Composite	19	9	2.11111	4	Production	Bladelet	1-25	Lateral back	Irregular	Rectilinear	Broken	flat	0	1-Unidirectional		Pisa	48	47	Quartz + Quartzite	46	32	29	43	1.4	1.5	Pebble	Polyhedron	angular	inner plan	fine/medium-grained	2	P_30	One	Long	3 - Exhausted	Perpendicular	flake, bladelet	Conforti	14	4	Soft	493
3278	P30	Fragmented	Meso-Proximal	22	9	2.44444	6	Production	Bladelet	26-50	Lateral	Triangular	Twisted	Broken	flat	0	1-Unidirectional		Pisa	48	47	Quartz + Quartzite	46	32	29	43	1.4	1.5	Pebble	Polyhedron	angular	inner plan	fine/medium-grained	2	P_30	One	Long	3 - Exhausted	Perpendicular	flake, bladelet	Conforti	14	4	Soft	493
3277	P30	Integer	Integer	31	11	2.81818	7	Initialization	Bladelet	51-75	Semi-total	Irregular	Rectilinear	Feather	flat	0	Indet		Pisa	48	47	Quartz + Quartzite	46	32	29	43	1.4	1.5	Pebble	Polyhedron	angular	inner plan	fine/medium-grained	2	P_30	One	Long	3 - Exhausted	Perpendicular	flake, bladelet	Conforti	14	4	Soft	493
3287	P30	Fragmented	Composite	14	11	1.27273	4	Production	Flake	1-25	Lateral	Linear	Rectilinear	Broken	flat	0	2-Bidirectional		Pisa	48	47	Quartz + Quartzite	46	32	29	43	1.4	1.5	Pebble	Polyhedron	angular	inner plan	fine/medium-grained	2	P_30	One	Long	3 - Exhausted	Perpendicular	flake, bladelet	Conforti	14	4	Soft	493
3275	P30	Integer	Integer	17	13	1.30769	2	Production	Flake	0		Linear	Rectilinear	Feather	flat	0	2-Bidirectional		Pisa	48	47	Quartz + Quartzite	46	32	29	43	1.4	1.5	Pebble	Polyhedron	angular	inner plan	fine/medium-grained	2	P_30	One	Long	3 - Exhausted	Perpendicular	flake, bladelet	Conforti	14	4	Soft	493
3288	P30	Integer	Integer	10	12	0.833333	5	Production	Flake	1-25	Proximal	Irregular	Rectilinear	Feather	flat	0	Indet		Pisa	48	47	Quartz + Quartzite	46	32	29	43	1.4	1.5	Pebble	Polyhedron	angular	inner plan	fine/medium-grained	2	P_30	One	Long	3 - Exhausted	Perpendicular	flake, bladelet	Conforti	14	4	Soft	493
3273	P30	Integer	Integer	21	14	1.5	3	Production	Flake	1-25	Lateral	Trapeze	Twisted	Feather	flat	0	1-Unidirectional		Pisa	48	47	Quartz + Quartzite	46	32	29	43	1.4	1.5	Pebble	Polyhedron	angular	inner plan	fine/medium-grained	2	P_30	One	Long	3 - Exhausted	Perpendicular	flake, bladelet	Conforti	14	4	Soft	493
3272	P30	Fragmented	Lateral	21	11	1.90909	6	Production	Flake	1-25	Proximal	Irregular	Rectilinear	Broken	flat	0	1-Unidirectional		Pisa	48	47	Quartz + Quartzite	46	32	29	43	1.4	1.5	Pebble	Polyhedron	angular	inner plan	fine/medium-grained	2	P_30	One	Long	3 - Exhausted	Perpendicular	flake, bladelet	Conforti	14	4	Soft	493
3271	P30	Integer	Integer	24	5	4.8	5	Production	Bladelet	0		Triangular	Rectilinear	Feather	flat	0	2-Bidirectional		Pisa	48	47	Quartz + Quartzite	46	32	29	43	1.4	1.5	Pebble	Polyhedron	angular	inner plan	fine/medium-grained	2	P_30	One	Long	3 - Exhausted	Perpendicular	flake, bladelet	Conforti	14	4	Soft	493
3270	P30	Fragmented	Meso-Proximal	23	8	2.875	3	Production	Bladelet	0		Trapeze	Rectilinear	Broken	flat	0	1-Unidirectional		Pisa	48	47	Quartz + Quartzite	46	32	29	43	1.4	1.5	Pebble	Polyhedron	angular	inner plan	fine/medium-grained	2	P_30	One	Long	3 - Exhausted	Perpendicular	flake, bladelet	Conforti	14	4	Soft	493
3269	P30	Fragmented	Composite	29	11	2.63636	7	Production	Bladelet	26-50	Transversal	Irregular	Twisted	Broken	flat	0	2-Bidirectional		Pisa	48	47	Quartz + Quartzite	46	32	29	43	1.4	1.5	Pebble	Polyhedron	angular	inner plan	fine/medium-grained	2	P_30	One	Long	3 - Exhausted	Perpendicular	flake, bladelet	Conforti	14	4	Soft	493
3268	P30	Integer	Integer	21	9	2.33333	6	Production	Bladelet	0		Triangular	Twisted	Plunging	flat	0	3-Orthogonal		Pisa	48	47	Quartz + Quartzite	46	32	29	43	1.4	1.5	Pebble	Polyhedron	angular	inner plan	fine/medium-grained	2	P_30	One	Long	3 - Exhausted	Perpendicular	flake, bladelet	Conforti	14	4	Soft	493
3267	P30	Integer	Integer	14	11	1.27273	5	Production	Core	1-25	Transversal				flatparalelepiped	2	2-Bidirectional		Pisa	48	47	Quartz + Quartzite	46	32	29	43	1.4	1.5	Pebble	Polyhedron	angular	inner plan	fine/medium-grained	2	P_30	One	Long	3 - Exhausted	Perpendicular	flake, bladelet	Conforti	14	4	Soft	493
3266	P30	Integer	Integer	21	15	1.4	6	Production	Core	26-50	Transversal				flatparalelepiped	1	2-Bidirectional		Pisa	48	47	Quartz + Quartzite	46	32	29	43	1.4	1.5	Pebble	Polyhedron	angular	inner plan	fine/medium-grained	2	P_30	One	Long	3 - Exhausted	Perpendicular	flake, bladelet	Conforti	14	4	Soft	493
3276	P30	Integer	Integer	19	16	1.1875	3	Initialization	Flake	76-99	Semi-total	Linear	Rectilinear	Broken	flat	0	1-Unidirectional		Pisa	48	47	Quartz + Quartzite	46	32	29	43	1.4	1.5	Pebble	Polyhedron	angular	inner plan	fine/medium-grained	2	P_30	One	Long	3 - Exhausted	Perpendicular	flake, bladelet	Conforti	14	4	Soft	493
3298	P30	Integer	Integer	11	3	3.66667	2	Production	Bladelet	1-25	Distal	Irregular	Rectilinear	Feather	flat	0	1-Unidirectional		Pisa	48	47	Quartz + Quartzite	46	32	29	43	1.4	1.5	Pebble	Polyhedron	angular	inner plan	fine/medium-grained	2	P_30	One	Long	3 - Exhausted	Perpendicular	flake, bladelet	Conforti	14	4	Soft	493
3308	P30	Integer	Integer	6	10	0.6	3	Production	Flake	0		Irregular	Rectilinear	Feather	flat	0	2-Bidirectional		Pisa	48	47	Quartz + Quartzite	46	32	29	43	1.4	1.5	Pebble	Polyhedron	angular	inner plan	fine/medium-grained	2	P_30	One	Long	3 - Exhausted	Perpendicular	flake, bladelet	Conforti	14	4	Soft	493
3307	P30	Integer	Integer	7	10	0.7	4	Production	Flake	26-50	Lateral	Irregular	Twisted	Feather	flat	0	2-Bidirectional		Pisa	48	47	Quartz + Quartzite	46	32	29	43	1.4	1.5	Pebble	Polyhedron	angular	inner plan	fine/medium-grained	2	P_30	One	Long	3 - Exhausted	Perpendicular	flake, bladelet	Conforti	14	4	Soft	493
3306	P30	Integer	Integer	10	8	1.25	3	Production	Flake	51-75	Proximal	Irregular	Twisted	Feather	flat	0	2-Bidirectional		Pisa	48	47	Quartz + Quartzite	46	32	29	43	1.4	1.5	Pebble	Polyhedron	angular	inner plan	fine/medium-grained	2	P_30	One	Long	3 - Exhausted	Perpendicular	flake, bladelet	Conforti	14	4	Soft	493
3305	P30	Fragmented	Composite	12	10	1.2	4	Production	Chunk	51-75	Transversal	Irregular				0	2-Bidirectional		Pisa	48	47	Quartz + Quartzite	46	32	29	43	1.4	1.5	Pebble	Polyhedron	angular	inner plan	fine/medium-grained	2	P_30	One	Long	3 - Exhausted	Perpendicular	flake, bladelet	Conforti	14	4	Soft	493
3304	P30	Fragmented	Lateral	11	7	1.57143	3	Initialization	Flake	76-99	Semi-total	Irregular	Rectilinear	Feather	flat	0	Indet		Pisa	48	47	Quartz + Quartzite	46	32	29	43	1.4	1.5	Pebble	Polyhedron	angular	inner plan	fine/medium-grained	2	P_30	One	Long	3 - Exhausted	Perpendicular	flake, bladelet	Conforti	14	4	Soft	493
3303	P30	Integer	Integer	11	6	1.83333	4	Production	Backed flake	26-50	Lateral back	Irregular	Convex	Broken	flat	0	2-Bidirectional		Pisa	48	47	Quartz + Quartzite	46	32	29	43	1.4	1.5	Pebble	Polyhedron	angular	inner plan	fine/medium-grained	2	P_30	One	Long	3 - Exhausted	Perpendicular	flake, bladelet	Conforti	14	4	Soft	493
3302	P30	Fragmented	Lateral	12	7	1.71429	3	Initialization	Flake	76-99	Semi-total	Irregular	Rectilinear	Broken	flat	0	Indet		Pisa	48	47	Quartz + Quartzite	46	32	29	43	1.4	1.5	Pebble	Polyhedron	angular	inner plan	fine/medium-grained	2	P_30	One	Long	3 - Exhausted	Perpendicular	flake, bladelet	Conforti	14	4	Soft	493
3301	P30	Integer	Integer	15	3	5	0	Production	Bladelet	1-25	Distal	Linear	Twisted	Broken	flat	0	1-Unidirectional		Pisa	48	47	Quartz + Quartzite	46	32	29	43	1.4	1.5	Pebble	Polyhedron	angular	inner plan	fine/medium-grained	2	P_30	One	Long	3 - Exhausted	Perpendicular	flake, bladelet	Conforti	14	4	Soft	493
3300	P30	Fragmented	Meso-Distal	13	4	3.25	2	Production	Bladelet	26-50	Distal	Irregular	Rectilinear	Feather	flat	0	1-Unidirectional		Pisa	48	47	Quartz + Quartzite	46	32	29	43	1.4	1.5	Pebble	Polyhedron	angular	inner plan	fine/medium-grained	2	P_30	One	Long	3 - Exhausted	Perpendicular	flake, bladelet	Conforti	14	4	Soft	493
3286	P30	Fragmented	Lateral	15	9	1.66667	6	Production	Flake	26-50	Transversal	Irregular	Convex	Broken	flat	0	2-Bidirectional		Pisa	48	47	Quartz + Quartzite	46	32	29	43	1.4	1.5	Pebble	Polyhedron	angular	inner plan	fine/medium-grained	2	P_30	One	Long	3 - Exhausted	Perpendicular	flake, bladelet	Conforti	14	4	Soft	493
3299	P30	Fragmented	Meso-Proximal	10	3	3.33333	2	Production	Bladelet	0		Irregular	Rectilinear	Feather	flat	0	2-Bidirectional		Pisa	48	47	Quartz + Quartzite	46	32	29	43	1.4	1.5	Pebble	Polyhedron	angular	inner plan	fine/medium-grained	2	P_30	One	Long	3 - Exhausted	Perpendicular	flake, bladelet	Conforti	14	4	Soft	493
3309	P30	Fragmented	Meso-Proximal	11	7	1.57143	2	Production	Flake	26-50	Lateral	Irregular	Twisted	Broken	flat	0	1-Unidirectional		Pisa	48	47	Quartz + Quartzite	46	32	29	43	1.4	1.5	Pebble	Polyhedron	angular	inner plan	fine/medium-grained	2	P_30	One	Long	3 - Exhausted	Perpendicular	flake, bladelet	Conforti	14	4	Soft	493
3297	P30	Fragmented	Composite	10	4	2.5	1	Production	Bladelet	0		Linear	Rectilinear	Broken	flat	0	1-Unidirectional		Pisa	48	47	Quartz + Quartzite	46	32	29	43	1.4	1.5	Pebble	Polyhedron	angular	inner plan	fine/medium-grained	2	P_30	One	Long	3 - Exhausted	Perpendicular	flake, bladelet	Conforti	14	4	Soft	493
3296	P30	Fragmented	Lateral	10	3	3.33333	1	Production	Flake	26-50	Transversal	Irregular	Rectilinear	Feather	flat	0	2-Bidirectional		Pisa	48	47	Quartz + Quartzite	46	32	29	43	1.4	1.5	Pebble	Polyhedron	angular	inner plan	fine/medium-grained	2	P_30	One	Long	3 - Exhausted	Perpendicular	flake, bladelet	Conforti	14	4	Soft	493
3295	P30	Fragmented	Composite	13	5	2.6	2	Initialization	Bladelet	51-75	Semi-total	Irregular	Rectilinear	Broken	flat	0	Indet		Pisa	48	47	Quartz + Quartzite	46	32	29	43	1.4	1.5	Pebble	Polyhedron	angular	inner plan	fine/medium-grained	2	P_30	One	Long	3 - Exhausted	Perpendicular	flake, bladelet	Conforti	14	4	Soft	493
3294	P30	Integer	Integer	12	5	2.4	3	Initialization	Bladelet	76-99	Semi-total	Irregular	Twisted	Feather	flat	0	Indet		Pisa	48	47	Quartz + Quartzite	46	32	29	43	1.4	1.5	Pebble	Polyhedron	angular	inner plan	fine/medium-grained	2	P_30	One	Long	3 - Exhausted	Perpendicular	flake, bladelet	Conforti	14	4	Soft	493
3293	P30	Integer	Integer	12	11	1.09091	2	Production	Flake	0		Linear	Rectilinear	Broken	flat	0	1-Unidirectional		Pisa	48	47	Quartz + Quartzite	46	32	29	43	1.4	1.5	Pebble	Polyhedron	angular	inner plan	fine/medium-grained	2	P_30	One	Long	3 - Exhausted	Perpendicular	flake, bladelet	Conforti	14	4	Soft	493
3292	P30	Integer	Integer	17	7	2.42857	3	Production	Bladelet	1-25	Proximal	Triangular	Twisted	Broken	flat	0	2-Bidirectional		Pisa	48	47	Quartz + Quartzite	46	32	29	43	1.4	1.5	Pebble	Polyhedron	angular	inner plan	fine/medium-grained	2	P_30	One	Long	3 - Exhausted	Perpendicular	flake, bladelet	Conforti	14	4	Soft	493
3291	P30	Fragmented	Lateral	15	6	2.5	4	Production	Bladelet	26-50	Lateral back	Trapeze	Rectilinear	Broken	flat	0	1-Unidirectional		Pisa	48	47	Quartz + Quartzite	46	32	29	43	1.4	1.5	Pebble	Polyhedron	angular	inner plan	fine/medium-grained	2	P_30	One	Long	3 - Exhausted	Perpendicular	flake, bladelet	Conforti	14	4	Soft	493
3290	P30	Integer	Integer	12	9	1.33333	6	Initialization	Flake	51-75	Semi-total	Irregular	Twisted	Hinged	flat	0	Indet		Pisa	48	47	Quartz + Quartzite	46	32	29	43	1.4	1.5	Pebble	Polyhedron	angular	inner plan	fine/medium-grained	2	P_30	One	Long	3 - Exhausted	Perpendicular	flake, bladelet	Conforti	14	4	Soft	493
3289	P30	Integer	Integer	14	4	3.5	4	Production	Bladelet	51-75	Semi-total	Trapeze	Rectilinear	Feather	flat	0	Indet		Pisa	48	47	Quartz + Quartzite	46	32	29	43	1.4	1.5	Pebble	Polyhedron	angular	inner plan	fine/medium-grained	2	P_30	One	Long	3 - Exhausted	Perpendicular	flake, bladelet	Conforti	14	4	Soft	493
3339	P31	Fragmented	Composite	16	9	1.77778	4	Production	Flake	1-25	Proximal	Irregular	Rectilinear	Plunging	flat	0	2-Bidirectional		Pisa	32	48	Quartz + Quartzite	39	27	27	30	1.4	1.4	Pebble	Polyhedron	angular	inner plan	fine/medium-grained	1	P_31	One	Long	3 - Exhausted	Perpendicular	flake, bladelet	Conforti	14	4	Soft	493
3328	P31	Integer	Integer	12	5	2.4	3	Production	Bladelet	26-50	Lateral	Triangular	Twisted	Feather	flat	0	5-Perpendicular		Pisa	32	48	Quartz + Quartzite	39	27	27	30	1.4	1.4	Pebble	Polyhedron	angular	inner plan	fine/medium-grained	1	P_31	One	Long	3 - Exhausted	Perpendicular	flake, bladelet	Conforti	14	4	Soft	493
3340	P31	Fragmented	Lateral	17	6	2.83333	5	Initialization	Flake	76-99	Semi-total	Irregular	Rectilinear	Feather	flat	0	Indet		Pisa	32	48	Quartz + Quartzite	39	27	27	30	1.4	1.4	Pebble	Polyhedron	angular	inner plan	fine/medium-grained	1	P_31	One	Long	3 - Exhausted	Perpendicular	flake, bladelet	Conforti	14	4	Soft	493
3341	P31	Integer	Integer	15	4	3.75	1	Production	Bladelet	26-50	Lateral	Triangular	Twisted	Feather	flat	0	1-Unidirectional		Pisa	32	48	Quartz + Quartzite	39	27	27	30	1.4	1.4	Pebble	Polyhedron	angular	inner plan	fine/medium-grained	1	P_31	One	Long	3 - Exhausted	Perpendicular	flake, bladelet	Conforti	14	4	Soft	493
3342	P31	Integer	Integer	17	4	4.25	2	Production	Bladelet	0		Irregular	Rectilinear	Feather	flat	0	2-Bidirectional		Pisa	32	48	Quartz + Quartzite	39	27	27	30	1.4	1.4	Pebble	Polyhedron	angular	inner plan	fine/medium-grained	1	P_31	One	Long	3 - Exhausted	Perpendicular	flake, bladelet	Conforti	14	4	Soft	493
3343	P31	Fragmented	Composite	13	8	1.625	5	Production	Flake	0		Irregular	Rectilinear	Feather	flat	0	1-Unidirectional		Pisa	32	48	Quartz + Quartzite	39	27	27	30	1.4	1.4	Pebble	Polyhedron	angular	inner plan	fine/medium-grained	1	P_31	One	Long	3 - Exhausted	Perpendicular	flake, bladelet	Conforti	14	4	Soft	493
3344	P31	Integer	Integer	16	4	4	2	Production	Bladelet	0		Triangular	Rectilinear	Feather	flat	0	2-Bidirectional		Pisa	32	48	Quartz + Quartzite	39	27	27	30	1.4	1.4	Pebble	Polyhedron	angular	inner plan	fine/medium-grained	1	P_31	One	Long	3 - Exhausted	Perpendicular	flake, bladelet	Conforti	14	4	Soft	493
3324	P31	Fragmented	Lateral	11	5	2.2	3	Initialization	Flake	76-99	Semi-total	Irregular	Rectilinear	Broken	flat	0	Indet		Pisa	32	48	Quartz + Quartzite	39	27	27	30	1.4	1.4	Pebble	Polyhedron	angular	inner plan	fine/medium-grained	1	P_31	One	Long	3 - Exhausted	Perpendicular	flake, bladelet	Conforti	14	4	Soft	493
3327	P31	Integer	Integer	12	3	4	1	Production	Bladelet	0		Linear	Rectilinear	Broken	flat	0	1-Unidirectional		Pisa	32	48	Quartz + Quartzite	39	27	27	30	1.4	1.4	Pebble	Polyhedron	angular	inner plan	fine/medium-grained	1	P_31	One	Long	3 - Exhausted	Perpendicular	flake, bladelet	Conforti	14	4	Soft	493
3326	P31	Fragmented	Composite	15	6	2.5	4	Production	Chunk	1-25	Lateral	Irregular				0	2-Bidirectional		Pisa	32	48	Quartz + Quartzite	39	27	27	30	1.4	1.4	Pebble	Polyhedron	angular	inner plan	fine/medium-grained	1	P_31	One	Long	3 - Exhausted	Perpendicular	flake, bladelet	Conforti	14	4	Soft	493
3329	P31	Integer	Integer	10	2	5	1	Production	Bladelet	0		Triangular	Rectilinear	Feather	flat	0	2-Bidirectional		Pisa	32	48	Quartz + Quartzite	39	27	27	30	1.4	1.4	Pebble	Polyhedron	angular	inner plan	fine/medium-grained	1	P_31	One	Long	3 - Exhausted	Perpendicular	flake, bladelet	Conforti	14	4	Soft	493
3330	P31	Integer	Integer	16	10	1.6	2	Production	Flake	0		Linear	Twisted	Feather	flat	0	2-Bidirectional		Pisa	32	48	Quartz + Quartzite	39	27	27	30	1.4	1.4	Pebble	Polyhedron	angular	inner plan	fine/medium-grained	1	P_31	One	Long	3 - Exhausted	Perpendicular	flake, bladelet	Conforti	14	4	Soft	493
3331	P31	Integer	Integer	11	7	1.57143	2	Production	Flake	0		Irregular	Rectilinear	Feather	flat	0	2-Bidirectional		Pisa	32	48	Quartz + Quartzite	39	27	27	30	1.4	1.4	Pebble	Polyhedron	angular	inner plan	fine/medium-grained	1	P_31	One	Long	3 - Exhausted	Perpendicular	flake, bladelet	Conforti	14	4	Soft	493
3325	P31	Integer	Integer	13	10	1.3	3	Production	Flake	1-25	Lateral	Irregular	Rectilinear	Feather	flat	0	2-Bidirectional		Pisa	32	48	Quartz + Quartzite	39	27	27	30	1.4	1.4	Pebble	Polyhedron	angular	inner plan	fine/medium-grained	1	P_31	One	Long	3 - Exhausted	Perpendicular	flake, bladelet	Conforti	14	4	Soft	493
3314	P31	Integer	Integer	17	8	2.125	11	Production	Core	0					Truncated pyramid/frustum	4	2-Bidirectional		Pisa	32	48	Quartz + Quartzite	39	27	27	30	1.4	1.4	Pebble	Polyhedron	angular	inner plan	fine/medium-grained	1	P_31	One	Long	3 - Exhausted	Perpendicular	flake, bladelet	Conforti	14	4	Soft	493
3323	P31	Integer	Integer	15	4	3.75	2	Production	Bladelet	26-50	Lateral	Triangular	Concave	Feather	flat	0	1-Unidirectional		Pisa	32	48	Quartz + Quartzite	39	27	27	30	1.4	1.4	Pebble	Polyhedron	angular	inner plan	fine/medium-grained	1	P_31	One	Long	3 - Exhausted	Perpendicular	flake, bladelet	Conforti	14	4	Soft	493
3345	P31	Integer	Integer	14	5	2.8	4	Production	Bladelet	26-50	Lateral back	Triangular	Rectilinear	Feather	flat	0	2-Bidirectional		Pisa	32	48	Quartz + Quartzite	39	27	27	30	1.4	1.4	Pebble	Polyhedron	angular	inner plan	fine/medium-grained	1	P_31	One	Long	3 - Exhausted	Perpendicular	flake, bladelet	Conforti	14	4	Soft	493
3322	P31	Fragmented	Composite	25	12	2.08333	6	Production	Flake	26-50	Lateral	Irregular	Rectilinear	Broken	flat	0	2-Bidirectional		Pisa	32	48	Quartz + Quartzite	39	27	27	30	1.4	1.4	Pebble	Polyhedron	angular	inner plan	fine/medium-grained	1	P_31	One	Long	3 - Exhausted	Perpendicular	flake, bladelet	Conforti	14	4	Soft	493
3315	P31	Integer	Integer	26	9	2.88889	6	Initialization	Bladelet	51-75	Semi-total	Irregular	Twisted	Broken	flat	0	1-Unidirectional		Pisa	32	48	Quartz + Quartzite	39	27	27	30	1.4	1.4	Pebble	Polyhedron	angular	inner plan	fine/medium-grained	1	P_31	One	Long	3 - Exhausted	Perpendicular	flake, bladelet	Conforti	14	4	Soft	493
3316	P31	Integer	Integer	16	15	1.06667	4	Initialization	Flake	51-75	Semi-total	Irregular	Rectilinear	Plunging	flat	0	1-Unidirectional		Pisa	32	48	Quartz + Quartzite	39	27	27	30	1.4	1.4	Pebble	Polyhedron	angular	inner plan	fine/medium-grained	1	P_31	One	Long	3 - Exhausted	Perpendicular	flake, bladelet	Conforti	14	4	Soft	493
3317	P31	Integer	Integer	9	19	0.473684	5	Production	Flake	26-50	Proximal	Irregular	Concave	Plunging	flat	0	2-Bidirectional		Pisa	32	48	Quartz + Quartzite	39	27	27	30	1.4	1.4	Pebble	Polyhedron	angular	inner plan	fine/medium-grained	1	P_31	One	Long	3 - Exhausted	Perpendicular	flake, bladelet	Conforti	14	4	Soft	493
3321	P31	Integer	Integer	21	10	2.1	6	Initialization	Bladelet	76-99	Semi-total	Irregular	Rectilinear	Feather	flat	0	3-Orthogonal		Pisa	32	48	Quartz + Quartzite	39	27	27	30	1.4	1.4	Pebble	Polyhedron	angular	inner plan	fine/medium-grained	1	P_31	One	Long	3 - Exhausted	Perpendicular	flake, bladelet	Conforti	14	4	Soft	493
3318	P31	Integer	Integer	14	17	0.823529	8	Initialization	Flake	51-75	Semi-total	Triangular	Rectilinear	Plunging	flat	0	3-Orthogonal		Pisa	32	48	Quartz + Quartzite	39	27	27	30	1.4	1.4	Pebble	Polyhedron	angular	inner plan	fine/medium-grained	1	P_31	One	Long	3 - Exhausted	Perpendicular	flake, bladelet	Conforti	14	4	Soft	493
3319	P31	Integer	Integer	20	11	1.81818	5	Initialization	Backed flake	51-75	Lateral back	Irregular	Twisted	Feather	flat	0	1-Unidirectional		Pisa	32	48	Quartz + Quartzite	39	27	27	30	1.4	1.4	Pebble	Polyhedron	angular	inner plan	fine/medium-grained	1	P_31	One	Long	3 - Exhausted	Perpendicular	flake, bladelet	Conforti	14	4	Soft	493
3332	P31	Fragmented	Composite	11	3	3.66667	3	Production	Chunk	26-50	Lateral	Triangular				0	Indet		Pisa	32	48	Quartz + Quartzite	39	27	27	30	1.4	1.4	Pebble	Polyhedron	angular	inner plan	fine/medium-grained	1	P_31	One	Long	3 - Exhausted	Perpendicular	flake, bladelet	Conforti	14	4	Soft	493
3337	P31	Integer	Integer	16	6	2.66667	4	Production	Bladelet	0		Triangular	Rectilinear	Feather	flat	0	1-Unidirectional		Pisa	32	48	Quartz + Quartzite	39	27	27	30	1.4	1.4	Pebble	Polyhedron	angular	inner plan	fine/medium-grained	1	P_31	One	Long	3 - Exhausted	Perpendicular	flake, bladelet	Conforti	14	4	Soft	493
3333	P31	Integer	Integer	11	6	1.83333	0	Production	Flake	0		Linear	Rectilinear	Feather	flat	0	1-Unidirectional		Pisa	32	48	Quartz + Quartzite	39	27	27	30	1.4	1.4	Pebble	Polyhedron	angular	inner plan	fine/medium-grained	1	P_31	One	Long	3 - Exhausted	Perpendicular	flake, bladelet	Conforti	14	4	Soft	493
3338	P31	Integer	Integer	17	8	2.125	4	Production	Bladelet	0		Triangular	Twisted	Hinged	flat	0	2-Bidirectional		Pisa	32	48	Quartz + Quartzite	39	27	27	30	1.4	1.4	Pebble	Polyhedron	angular	inner plan	fine/medium-grained	1	P_31	One	Long	3 - Exhausted	Perpendicular	flake, bladelet	Conforti	14	4	Soft	493
3334	P31	Integer	Integer	14	4	3.5	2	Production	Bladelet	0		Triangular	Rectilinear	Feather	flat	0	1-Unidirectional		Pisa	32	48	Quartz + Quartzite	39	27	27	30	1.4	1.4	Pebble	Polyhedron	angular	inner plan	fine/medium-grained	1	P_31	One	Long	3 - Exhausted	Perpendicular	flake, bladelet	Conforti	14	4	Soft	493
3335	P31	Fragmented	Mesial	13	10	1.3	6	Production	Flake	1-25	Lateral	Triangular	Rectilinear	Broken	flat	0	1-Unidirectional		Pisa	32	48	Quartz + Quartzite	39	27	27	30	1.4	1.4	Pebble	Polyhedron	angular	inner plan	fine/medium-grained	1	P_31	One	Long	3 - Exhausted	Perpendicular	flake, bladelet	Conforti	14	4	Soft	493
3336	P31	Fragmented	Meso-Proximal	10	5	2	2	Production	Bladelet	0		Triangular	Rectilinear	Broken	flat	0	1-Unidirectional		Pisa	32	48	Quartz + Quartzite	39	27	27	30	1.4	1.4	Pebble	Polyhedron	angular	inner plan	fine/medium-grained	1	P_31	One	Long	3 - Exhausted	Perpendicular	flake, bladelet	Conforti	14	4	Soft	493
3320	P31	Integer	Integer	18	10	1.8	4	Production	Flake	26-50	Lateral	Irregular	Rectilinear	Feather	flat	0	2-Bidirectional		Pisa	32	48	Quartz + Quartzite	39	27	27	30	1.4	1.4	Pebble	Polyhedron	angular	inner plan	fine/medium-grained	1	P_31	One	Long	3 - Exhausted	Perpendicular	flake, bladelet	Conforti	14	4	Soft	493
3354	P32	Integer	Integer	16	7	2.28571	3	Production	Bladelet	0		Irregular	Rectilinear	Feather	flat	0	2-Bidirectional		Pisa	26	59 (44)	Quartz + Quartzite	26	38	17	23	0.6	1.5	Flake	Flat-convex	angular	inner plan	fine/medium-grained	4	P_32	One	Long	3 - Exhausted	Perpendicular	flake, bladelet	Conforti	15	4	Hard	357
3351	P32	Fragmented	Composite			#DIV/0!		Production	Chunk	1-25	Lateral	Irregular				0	2-Bidirectional		Pisa	26	59 (44)	Quartz + Quartzite	26	38	17	23	0.6	1.5	Flake	Flat-convex	angular	inner plan	fine/medium-grained	4	P_32	One	Long	3 - Exhausted	Perpendicular	flake, bladelet	Conforti	15	4	Hard	357
3367	P32	Fragmented	Composite	10	3	3.33333	2	Production	Chunk	0		Irregular				0	2-Bidirectional		Pisa	26	59 (44)	Quartz + Quartzite	26	38	17	23	0.6	1.5	Flake	Flat-convex	angular	inner plan	fine/medium-grained	4	P_32	One	Long	3 - Exhausted	Perpendicular	flake, bladelet	Conforti	15	4	Hard	357
3355	P32	Integer	Integer	14	11	1.27273	4	Production	Flake	1-25	Transversal	Irregular	Convex	Feather	flat	0	2-Bidirectional		Pisa	26	59 (44)	Quartz + Quartzite	26	38	17	23	0.6	1.5	Flake	Flat-convex	angular	inner plan	fine/medium-grained	4	P_32	One	Long	3 - Exhausted	Perpendicular	flake, bladelet	Conforti	15	4	Hard	357
3356	P32	Integer	Integer	20	8	2.5	6	Production	Core	0					Truncated pyramid/frustum	3	2-Bidirectional		Pisa	26	59 (44)	Quartz + Quartzite	26	38	17	23	0.6	1.5	Flake	Flat-convex	angular	inner plan	fine/medium-grained	4	P_32	One	Long	3 - Exhausted	Perpendicular	flake, bladelet	Conforti	15	4	Hard	357
3357	P32	Integer	Integer	16	4	4	3	Production	Bladelet	26-50	Lateral	Irregular	Rectilinear	Feather	flat	0	2-Bidirectional		Pisa	26	59 (44)	Quartz + Quartzite	26	38	17	23	0.6	1.5	Flake	Flat-convex	angular	inner plan	fine/medium-grained	4	P_32	One	Long	3 - Exhausted	Perpendicular	flake, bladelet	Conforti	15	4	Hard	357
3358	P32	Integer	Integer	16	8	2	2	Production	Bladelet	0		Irregular	Rectilinear	Feather	flat	0	1-Unidirectional		Pisa	26	59 (44)	Quartz + Quartzite	26	38	17	23	0.6	1.5	Flake	Flat-convex	angular	inner plan	fine/medium-grained	4	P_32	One	Long	3 - Exhausted	Perpendicular	flake, bladelet	Conforti	15	4	Hard	357
3359	P32	Integer	Integer	11	2	5.5	2	Production	Bladelet	0		Triangular	Concave	Plunging	flat	0	1-Unidirectional		Pisa	26	59 (44)	Quartz + Quartzite	26	38	17	23	0.6	1.5	Flake	Flat-convex	angular	inner plan	fine/medium-grained	4	P_32	One	Long	3 - Exhausted	Perpendicular	flake, bladelet	Conforti	15	4	Hard	357
3360	P32	Integer	Integer	11	6	1.83333	3	Production	Flake	0		Linear	Rectilinear	Feather	flat	0	2-Bidirectional		Pisa	26	59 (44)	Quartz + Quartzite	26	38	17	23	0.6	1.5	Flake	Flat-convex	angular	inner plan	fine/medium-grained	4	P_32	One	Long	3 - Exhausted	Perpendicular	flake, bladelet	Conforti	15	4	Hard	357
3361	P32	Fragmented	Composite	11	7	1.57143	1	Production	Flake	0		Linear	Rectilinear	Broken	flat	0	1-Unidirectional		Pisa	26	59 (44)	Quartz + Quartzite	26	38	17	23	0.6	1.5	Flake	Flat-convex	angular	inner plan	fine/medium-grained	4	P_32	One	Long	3 - Exhausted	Perpendicular	flake, bladelet	Conforti	15	4	Hard	357
3362	P32	Integer	Integer	12	8	1.5	2	Production	Flake	26-50	Lateral	Irregular	Rectilinear	Feather	flat	0	1-Unidirectional		Pisa	26	59 (44)	Quartz + Quartzite	26	38	17	23	0.6	1.5	Flake	Flat-convex	angular	inner plan	fine/medium-grained	4	P_32	One	Long	3 - Exhausted	Perpendicular	flake, bladelet	Conforti	15	4	Hard	357
3363	P32	Integer	Integer	11	4	2.75	1	Production	Bladelet	0		Irregular	Twisted	Feather	flat	0	2-Bidirectional		Pisa	26	59 (44)	Quartz + Quartzite	26	38	17	23	0.6	1.5	Flake	Flat-convex	angular	inner plan	fine/medium-grained	4	P_32	One	Long	3 - Exhausted	Perpendicular	flake, bladelet	Conforti	15	4	Hard	357
3364	P32	Integer	Integer	14	5	2.8	2	Production	Bladelet	26-50	Lateral	Triangular	Rectilinear	Feather	flat	0	1-Unidirectional		Pisa	26	59 (44)	Quartz + Quartzite	26	38	17	23	0.6	1.5	Flake	Flat-convex	angular	inner plan	fine/medium-grained	4	P_32	One	Long	3 - Exhausted	Perpendicular	flake, bladelet	Conforti	15	4	Hard	357
3349	P32	Integer	Integer	22	15	1.46667	3	Initialization	Flake	51-75	Semi-total	Linear	Concave	Feather	flat	0	1-Unidirectional		Pisa	26	59 (44)	Quartz + Quartzite	26	38	17	23	0.6	1.5	Flake	Flat-convex	angular	inner plan	fine/medium-grained	4	P_32	One	Long	3 - Exhausted	Perpendicular	flake, bladelet	Conforti	15	4	Hard	357
3366	P32	Integer	Integer	12	3	4	1	Production	Bladelet	1-25	Lateral	Triangular	Rectilinear	Feather	flat	0	1-Unidirectional		Pisa	26	59 (44)	Quartz + Quartzite	26	38	17	23	0.6	1.5	Flake	Flat-convex	angular	inner plan	fine/medium-grained	4	P_32	One	Long	3 - Exhausted	Perpendicular	flake, bladelet	Conforti	15	4	Hard	357
3350	P32	Fragmented	Composite			#DIV/0!		Production	Chunk	0		Irregular				0	3-Orthogonal		Pisa	26	59 (44)	Quartz + Quartzite	26	38	17	23	0.6	1.5	Flake	Flat-convex	angular	inner plan	fine/medium-grained	4	P_32	One	Long	3 - Exhausted	Perpendicular	flake, bladelet	Conforti	15	4	Hard	357
3368	P32	Fragmented	Composite	10	2	5	0	Production	Chunk	0		Irregular				0	Indet		Pisa	26	59 (44)	Quartz + Quartzite	26	38	17	23	0.6	1.5	Flake	Flat-convex	angular	inner plan	fine/medium-grained	4	P_32	One	Long	3 - Exhausted	Perpendicular	flake, bladelet	Conforti	15	4	Hard	357
3369	P32	Integer	Integer	10	5	2	1	Production	Bladelet	0		Linear	Twisted	Feather	flat	0	2-Bidirectional		Pisa	26	59 (44)	Quartz + Quartzite	26	38	17	23	0.6	1.5	Flake	Flat-convex	angular	inner plan	fine/medium-grained	4	P_32	One	Long	3 - Exhausted	Perpendicular	flake, bladelet	Conforti	15	4	Hard	357
3370	P32	Integer	Integer	11	7	1.57143	2	Initialization	Flake	Total	Total	Linear	Convex	Feather	flat	0	Indet		Pisa	26	59 (44)	Quartz + Quartzite	26	38	17	23	0.6	1.5	Flake	Flat-convex	angular	inner plan	fine/medium-grained	4	P_32	One	Long	3 - Exhausted	Perpendicular	flake, bladelet	Conforti	15	4	Hard	357
3371	P32	Integer	Integer	12	6	2	1	Production	Bladelet	0		Linear	Rectilinear	Feather	flat	0	1-Unidirectional		Pisa	26	59 (44)	Quartz + Quartzite	26	38	17	23	0.6	1.5	Flake	Flat-convex	angular	inner plan	fine/medium-grained	4	P_32	One	Long	3 - Exhausted	Perpendicular	flake, bladelet	Conforti	15	4	Hard	357
3348	P32	Integer	Integer	15	13	1.15385	4	Production	Core	1-25	Lateral				flatparalelepiped	2	2-Bidirectional		Pisa	26	59 (44)	Quartz + Quartzite	26	38	17	23	0.6	1.5	Flake	Flat-convex	angular	inner plan	fine/medium-grained	4	P_32	One	Long	3 - Exhausted	Perpendicular	flake, bladelet	Conforti	15	4	Hard	357
3346	P32	Integer	Integer	19	21	0.904762	13	Production	Core	1-25	Transversal				flatparalelepiped	2	2-Bidirectional		Pisa	26	59 (44)	Quartz + Quartzite	26	38	17	23	0.6	1.5	Flake	Flat-convex	angular	inner plan	fine/medium-grained	4	P_32	One	Long	3 - Exhausted	Perpendicular	flake, bladelet	Conforti	15	4	Hard	357
3347	P32	Integer	Integer	17	6	2.83333	7	Production	Core	1-25	Proximal				triangular prism	4	2-Bidirectional		Pisa	26	59 (44)	Quartz + Quartzite	26	38	17	23	0.6	1.5	Flake	Flat-convex	angular	inner plan	fine/medium-grained	4	P_32	One	Long	3 - Exhausted	Perpendicular	flake, bladelet	Conforti	15	4	Hard	357
3353	P32	Integer	Integer	12	5	2.4	2	Production	Bladelet	0		Triangular	Rectilinear	Feather	flat	0	2-Bidirectional		Pisa	26	59 (44)	Quartz + Quartzite	26	38	17	23	0.6	1.5	Flake	Flat-convex	angular	inner plan	fine/medium-grained	4	P_32	One	Long	3 - Exhausted	Perpendicular	flake, bladelet	Conforti	15	4	Hard	357
3352	P32	Fragmented	Meso-Proximal	18	10	1.8	7	Production	Flake	1-25	Proximal	Irregular	Rectilinear	Broken	flat	0	2-Bidirectional		Pisa	26	59 (44)	Quartz + Quartzite	26	38	17	23	0.6	1.5	Flake	Flat-convex	angular	inner plan	fine/medium-grained	4	P_32	One	Long	3 - Exhausted	Perpendicular	flake, bladelet	Conforti	15	4	Hard	357
3365	P32	Integer	Integer	12	4	3	1	Production	Bladelet	0		Irregular	Rectilinear	Feather	flat	0	1-Unidirectional		Pisa	26	59 (44)	Quartz + Quartzite	26	38	17	23	0.6	1.5	Flake	Flat-convex	angular	inner plan	fine/medium-grained	4	P_32	One	Long	3 - Exhausted	Perpendicular	flake, bladelet	Conforti	15	4	Hard	357
3398	P33	Integer	Integer	7	10	0.7	3	Production	Flake	0		Irregular	Concave	Plunging	flat	0	1-Unidirectional		Pisa	32	62 (41)	Quartz + Quartzite	42	33	28	34	1.2	1.5	Core	Polyhedron	angular	inner plan	fine/medium-grained	0	P_33	One	Long	3 - Exhausted	Perpendicular	flake, bladelet	Conforti	17	5	Hard	333
3378	P33	Integer	Integer	20	4	5	4	Production	Bladelet	1-25	Proximal	Triangular	Rectilinear	Broken	flat	0	3-Orthogonal		Pisa	32	62 (41)	Quartz + Quartzite	42	33	28	34	1.2	1.5	Core	Polyhedron	angular	inner plan	fine/medium-grained	0	P_33	One	Long	3 - Exhausted	Perpendicular	flake, bladelet	Conforti	17	5	Hard	333
3400	P33	Fragmented	Composite	14	6	2.33333	3	Production	Bladelet	0		Irregular	Convex	Broken	flat	0	1-Unidirectional		Pisa	32	62 (41)	Quartz + Quartzite	42	33	28	34	1.2	1.5	Core	Polyhedron	angular	inner plan	fine/medium-grained	0	P_33	One	Long	3 - Exhausted	Perpendicular	flake, bladelet	Conforti	17	5	Hard	333
3384	P33	Fragmented	Meso-Proximal	12	9	1.33333	2	Production	Flake	1-25	Transversal	Linear	Rectilinear	Broken	flat	0	1-Unidirectional		Pisa	32	62 (41)	Quartz + Quartzite	42	33	28	34	1.2	1.5	Core	Polyhedron	angular	inner plan	fine/medium-grained	0	P_33	One	Long	3 - Exhausted	Perpendicular	flake, bladelet	Conforti	17	5	Hard	333
3383	P33	Fragmented	Composite	12	9	1.33333	7	Production	Chunk	26-50	Lateral	Triangular				0	1-Unidirectional		Pisa	32	62 (41)	Quartz + Quartzite	42	33	28	34	1.2	1.5	Core	Polyhedron	angular	inner plan	fine/medium-grained	0	P_33	One	Long	3 - Exhausted	Perpendicular	flake, bladelet	Conforti	17	5	Hard	333
3382	P33	Integer	Integer	14	6	2.33333	1	Production	Bladelet	0		Linear	Twisted	Hinged	flat	0	2-Bidirectional		Pisa	32	62 (41)	Quartz + Quartzite	42	33	28	34	1.2	1.5	Core	Polyhedron	angular	inner plan	fine/medium-grained	0	P_33	One	Long	3 - Exhausted	Perpendicular	flake, bladelet	Conforti	17	5	Hard	333
3381	P33	Integer	Integer	15	5	3	4	Production	Bladelet	0		Triangular	Rectilinear	Plunging	flat	0	1-Unidirectional		Pisa	32	62 (41)	Quartz + Quartzite	42	33	28	34	1.2	1.5	Core	Polyhedron	angular	inner plan	fine/medium-grained	0	P_33	One	Long	3 - Exhausted	Perpendicular	flake, bladelet	Conforti	17	5	Hard	333
3386	P33	Integer	Integer	17	5	3.4	2	Production	Bladelet	1-25	Lateral	Triangular	Rectilinear	Broken	flat	0	2-Bidirectional		Pisa	32	62 (41)	Quartz + Quartzite	42	33	28	34	1.2	1.5	Core	Polyhedron	angular	inner plan	fine/medium-grained	0	P_33	One	Long	3 - Exhausted	Perpendicular	flake, bladelet	Conforti	17	5	Hard	333
3379	P33	Integer	Integer	19	6	3.16667	6	Production	Bladelet	0		Irregular	Rectilinear	Feather	flat	0	2-Bidirectional		Pisa	32	62 (41)	Quartz + Quartzite	42	33	28	34	1.2	1.5	Core	Polyhedron	angular	inner plan	fine/medium-grained	0	P_33	One	Long	3 - Exhausted	Perpendicular	flake, bladelet	Conforti	17	5	Hard	333
3387	P33	Fragmented	Composite	12	10	1.2	5	Production	Chunk	26-50	Lateral	Irregular				0	Indet		Pisa	32	62 (41)	Quartz + Quartzite	42	33	28	34	1.2	1.5	Core	Polyhedron	angular	inner plan	fine/medium-grained	0	P_33	One	Long	3 - Exhausted	Perpendicular	flake, bladelet	Conforti	17	5	Hard	333
3377	P33	Fragmented	Meso-Proximal	18	9	2	4	Production	Bladelet	0		Triangular	Convex	Broken	flat	0	2-Bidirectional		Pisa	32	62 (41)	Quartz + Quartzite	42	33	28	34	1.2	1.5	Core	Polyhedron	angular	inner plan	fine/medium-grained	0	P_33	One	Long	3 - Exhausted	Perpendicular	flake, bladelet	Conforti	17	5	Hard	333
3376	P33	Fragmented	Lateral	12	5	2.4	3	Production	Flake	0		Irregular	Rectilinear	Feather	flat	0	1-Unidirectional		Pisa	32	62 (41)	Quartz + Quartzite	42	33	28	34	1.2	1.5	Core	Polyhedron	angular	inner plan	fine/medium-grained	0	P_33	One	Long	3 - Exhausted	Perpendicular	flake, bladelet	Conforti	17	5	Hard	333
3375	P33	Fragmented	Composite	15	10	1.5	4	Production	Flake	0		Irregular	Rectilinear	Feather	flat	0	5-Perpendicular		Pisa	32	62 (41)	Quartz + Quartzite	42	33	28	34	1.2	1.5	Core	Polyhedron	angular	inner plan	fine/medium-grained	0	P_33	One	Long	3 - Exhausted	Perpendicular	flake, bladelet	Conforti	17	5	Hard	333
3374	P33	Integer	Integer	32	28	1.14286	8	Production	Flake	26-50	Lateral	Irregular	Concave	Feather	flat	0	5-Perpendicular		Pisa	32	62 (41)	Quartz + Quartzite	42	33	28	34	1.2	1.5	Core	Polyhedron	angular	inner plan	fine/medium-grained	0	P_33	One	Long	3 - Exhausted	Perpendicular	flake, bladelet	Conforti	17	5	Hard	333
3373	P33	Integer	Integer	19	6	3.16667	4	Production	Bladelet	0		Irregular	Rectilinear	Feather	flat	0	2-Bidirectional		Pisa	32	62 (41)	Quartz + Quartzite	42	33	28	34	1.2	1.5	Core	Polyhedron	angular	inner plan	fine/medium-grained	0	P_33	One	Long	3 - Exhausted	Perpendicular	flake, bladelet	Conforti	17	5	Hard	333
3372	P33	Integer	Integer	16	11	1.45455	5	Production	Flake	0		Irregular	Rectilinear	Feather	flat	0	2-Bidirectional		Pisa	32	62 (41)	Quartz + Quartzite	42	33	28	34	1.2	1.5	Core	Polyhedron	angular	inner plan	fine/medium-grained	0	P_33	One	Long	3 - Exhausted	Perpendicular	flake, bladelet	Conforti	17	5	Hard	333
3380	P33	Integer	Integer	19	9	2.11111	3	Production	Bladelet	0		Irregular	Rectilinear	Feather	flat	0	1-Unidirectional		Pisa	32	62 (41)	Quartz + Quartzite	42	33	28	34	1.2	1.5	Core	Polyhedron	angular	inner plan	fine/medium-grained	0	P_33	One	Long	3 - Exhausted	Perpendicular	flake, bladelet	Conforti	17	5	Hard	333
3394	P33	Integer	Integer	10	5	2	0	Production	Bladelet	0		Linear	Rectilinear	Feather	flat	0	1-Unidirectional		Pisa	32	62 (41)	Quartz + Quartzite	42	33	28	34	1.2	1.5	Core	Polyhedron	angular	inner plan	fine/medium-grained	0	P_33	One	Long	3 - Exhausted	Perpendicular	flake, bladelet	Conforti	17	5	Hard	333
3402	P33	Fragmented	Lateral	11	5	2.2	2	Production	Flake	1-25	Proximal	Irregular	Concave	Feather	flat	0	1-Unidirectional		Pisa	32	62 (41)	Quartz + Quartzite	42	33	28	34	1.2	1.5	Core	Polyhedron	angular	inner plan	fine/medium-grained	0	P_33	One	Long	3 - Exhausted	Perpendicular	flake, bladelet	Conforti	17	5	Hard	333
3401	P33	Fragmented	Composite	9	6	1.5	4	Production	Chunk	0		Irregular				0	Indet		Pisa	32	62 (41)	Quartz + Quartzite	42	33	28	34	1.2	1.5	Core	Polyhedron	angular	inner plan	fine/medium-grained	0	P_33	One	Long	3 - Exhausted	Perpendicular	flake, bladelet	Conforti	17	5	Hard	333
3399	P33	Integer	Integer	11	4	2.75	1	Production	Bladelet	0		Irregular	Rectilinear	Feather	flat	0	3-Orthogonal		Pisa	32	62 (41)	Quartz + Quartzite	42	33	28	34	1.2	1.5	Core	Polyhedron	angular	inner plan	fine/medium-grained	0	P_33	One	Long	3 - Exhausted	Perpendicular	flake, bladelet	Conforti	17	5	Hard	333
3397	P33	Integer	Integer	14	6	2.33333	3	Production	Bladelet	0		Triangular	Twisted	Feather	flat	0	1-Unidirectional		Pisa	32	62 (41)	Quartz + Quartzite	42	33	28	34	1.2	1.5	Core	Polyhedron	angular	inner plan	fine/medium-grained	0	P_33	One	Long	3 - Exhausted	Perpendicular	flake, bladelet	Conforti	17	5	Hard	333
3385	P33	Fragmented	Composite	17	9	1.88889	6	Production	Chunk	1-25	Transversal	Irregular				0	3-Orthogonal		Pisa	32	62 (41)	Quartz + Quartzite	42	33	28	34	1.2	1.5	Core	Polyhedron	angular	inner plan	fine/medium-grained	0	P_33	One	Long	3 - Exhausted	Perpendicular	flake, bladelet	Conforti	17	5	Hard	333
3395	P33	Integer	Integer	11	7	1.57143	3	Production	Backed flake	1-25	Lateral back	Irregular	Rectilinear	Feather	flat	0	3-Orthogonal		Pisa	32	62 (41)	Quartz + Quartzite	42	33	28	34	1.2	1.5	Core	Polyhedron	angular	inner plan	fine/medium-grained	0	P_33	One	Long	3 - Exhausted	Perpendicular	flake, bladelet	Conforti	17	5	Hard	333
3403	P33	Fragmented	Composite	12	8	1.5	3	Production	Flake	1-25	Transversal	Irregular	Twisted	Broken	flat	0	2-Bidirectional		Pisa	32	62 (41)	Quartz + Quartzite	42	33	28	34	1.2	1.5	Core	Polyhedron	angular	inner plan	fine/medium-grained	0	P_33	One	Long	3 - Exhausted	Perpendicular	flake, bladelet	Conforti	17	5	Hard	333
3393	P33	Fragmented	Composite	10	5	2	2	Production	Bladelet	26-50	Lateral	Triangular	Twisted	Broken	flat	0	1-Unidirectional		Pisa	32	62 (41)	Quartz + Quartzite	42	33	28	34	1.2	1.5	Core	Polyhedron	angular	inner plan	fine/medium-grained	0	P_33	One	Long	3 - Exhausted	Perpendicular	flake, bladelet	Conforti	17	5	Hard	333
3392	P33	Fragmented	Mesial	11	4	2.75	2	Production	Bladelet	0		Irregular	Rectilinear	Broken	flat	0	2-Bidirectional		Pisa	32	62 (41)	Quartz + Quartzite	42	33	28	34	1.2	1.5	Core	Polyhedron	angular	inner plan	fine/medium-grained	0	P_33	One	Long	3 - Exhausted	Perpendicular	flake, bladelet	Conforti	17	5	Hard	333
3391	P33	Integer	Integer	10	5	2	3	Production	Bladelet	26-50	Lateral back	Triangular	Rectilinear	Feather	flat	0	2-Bidirectional		Pisa	32	62 (41)	Quartz + Quartzite	42	33	28	34	1.2	1.5	Core	Polyhedron	angular	inner plan	fine/medium-grained	0	P_33	One	Long	3 - Exhausted	Perpendicular	flake, bladelet	Conforti	17	5	Hard	333
3390	P33	Fragmented	Composite	12	8	1.5	6	Production	Chunk	26-50	Lateral	Triangular				0	1-Unidirectional		Pisa	32	62 (41)	Quartz + Quartzite	42	33	28	34	1.2	1.5	Core	Polyhedron	angular	inner plan	fine/medium-grained	0	P_33	One	Long	3 - Exhausted	Perpendicular	flake, bladelet	Conforti	17	5	Hard	333
3389	P33	Integer	Integer	19	9	2.11111	2	Production	Bladelet	1-25	Lateral	Linear	Twisted	Feather	flat	0	1-Unidirectional		Pisa	32	62 (41)	Quartz + Quartzite	42	33	28	34	1.2	1.5	Core	Polyhedron	angular	inner plan	fine/medium-grained	0	P_33	One	Long	3 - Exhausted	Perpendicular	flake, bladelet	Conforti	17	5	Hard	333
3388	P33	Fragmented	Composite	18	7	2.57143	6	Production	Chunk	1-25	Proximal	Irregular				0	3-Orthogonal		Pisa	32	62 (41)	Quartz + Quartzite	42	33	28	34	1.2	1.5	Core	Polyhedron	angular	inner plan	fine/medium-grained	0	P_33	One	Long	3 - Exhausted	Perpendicular	flake, bladelet	Conforti	17	5	Hard	333
3396	P33	Integer	Integer	12	5	2.4	1	Production	Bladelet	0		Triangular	Rectilinear	Feather	flat	0	2-Bidirectional		Pisa	32	62 (41)	Quartz + Quartzite	42	33	28	34	1.2	1.5	Core	Polyhedron	angular	inner plan	fine/medium-grained	0	P_33	One	Long	3 - Exhausted	Perpendicular	flake, bladelet	Conforti	17	5	Hard	333
3447	P34	Fragmented	Lateral	11	5	2.2	1	Production	Flake	0		Linear	Rectilinear	Feather	flat	0	1-Unidirectional		Pisa	44	53	Quartz + Quartzite	48	45	27	42	1	1.7	Pebble	Polyhedron	sub-angular	inner plan	fine/medium-grained	4	P_34	One	Long	3 - Exhausted	Perpendicular	flake, bladelet	Conforti	14	4	Soft	493
3434	P34	Integer	Integer	13	7	1.85714	2	Production	Flake	0		Linear	Twisted	Broken	flat	0	2-Bidirectional		Pisa	44	53	Quartz + Quartzite	48	45	27	42	1	1.7	Pebble	Polyhedron	sub-angular	inner plan	fine/medium-grained	4	P_34	One	Long	3 - Exhausted	Perpendicular	flake, bladelet	Conforti	14	4	Soft	493
3435	P34	Integer	Integer	13	14	0.928571	2	Initialization	Flake	51-75	Semi-total	Linear	Rectilinear	Hinged	flat	0	Indet		Pisa	44	53	Quartz + Quartzite	48	45	27	42	1	1.7	Pebble	Polyhedron	sub-angular	inner plan	fine/medium-grained	4	P_34	One	Long	3 - Exhausted	Perpendicular	flake, bladelet	Conforti	14	4	Soft	493
3436	P34	Integer	Integer	15	8	1.875	3	Initialization	Flake	76-99	Semi-total	Irregular	Convex	Feather	flat	0	Indet		Pisa	44	53	Quartz + Quartzite	48	45	27	42	1	1.7	Pebble	Polyhedron	sub-angular	inner plan	fine/medium-grained	4	P_34	One	Long	3 - Exhausted	Perpendicular	flake, bladelet	Conforti	14	4	Soft	493
3437	P34	Integer	Integer	13	10	1.3	3	Initialization	Flake	51-75	Semi-total	Irregular	Convex	Feather	flat	0	2-Bidirectional		Pisa	44	53	Quartz + Quartzite	48	45	27	42	1	1.7	Pebble	Polyhedron	sub-angular	inner plan	fine/medium-grained	4	P_34	One	Long	3 - Exhausted	Perpendicular	flake, bladelet	Conforti	14	4	Soft	493
3438	P34	Integer	Integer	15	8	1.875	3	Production	Flake	1-25	Lateral	Irregular	Rectilinear	Feather	flat	0	1-Unidirectional		Pisa	44	53	Quartz + Quartzite	48	45	27	42	1	1.7	Pebble	Polyhedron	sub-angular	inner plan	fine/medium-grained	4	P_34	One	Long	3 - Exhausted	Perpendicular	flake, bladelet	Conforti	14	4	Soft	493
3439	P34	Fragmented	Meso-Proximal	11	11	1	2	Initialization	Flake	76-99	Semi-total	Irregular	Rectilinear	Broken	flat	0	1-Unidirectional		Pisa	44	53	Quartz + Quartzite	48	45	27	42	1	1.7	Pebble	Polyhedron	sub-angular	inner plan	fine/medium-grained	4	P_34	One	Long	3 - Exhausted	Perpendicular	flake, bladelet	Conforti	14	4	Soft	493
3440	P34	Integer	Integer	14	7	2	2	Production	Bladelet	0		Linear	Twisted	Feather	flat	0	2-Bidirectional		Pisa	44	53	Quartz + Quartzite	48	45	27	42	1	1.7	Pebble	Polyhedron	sub-angular	inner plan	fine/medium-grained	4	P_34	One	Long	3 - Exhausted	Perpendicular	flake, bladelet	Conforti	14	4	Soft	493
3441	P34	Fragmented	Lateral	13	5	2.6	2	Production	Flake	0		Irregular	Rectilinear	Feather	flat	0	2-Bidirectional		Pisa	44	53	Quartz + Quartzite	48	45	27	42	1	1.7	Pebble	Polyhedron	sub-angular	inner plan	fine/medium-grained	4	P_34	One	Long	3 - Exhausted	Perpendicular	flake, bladelet	Conforti	14	4	Soft	493
3430	P34	Integer	Integer	16	20	0.8	2	Production	Flake	1-25	Distal	Linear	Rectilinear	Feather	flat	0	1-Unidirectional		Pisa	44	53	Quartz + Quartzite	48	45	27	42	1	1.7	Pebble	Polyhedron	sub-angular	inner plan	fine/medium-grained	4	P_34	One	Long	3 - Exhausted	Perpendicular	flake, bladelet	Conforti	14	4	Soft	493
3431	P34	Integer	Integer	20	9	2.22222	4	Initialization	Bladelet	51-75	Semi-total	Irregular	Twisted	Feather	flat	0	1-Unidirectional		Pisa	44	53	Quartz + Quartzite	48	45	27	42	1	1.7	Pebble	Polyhedron	sub-angular	inner plan	fine/medium-grained	4	P_34	One	Long	3 - Exhausted	Perpendicular	flake, bladelet	Conforti	14	4	Soft	493
3442	P34	Integer	Integer	9	11	0.818182	2	Initialization	Flake	Total	Total	Irregular	Rectilinear	Hinged	flat	0	Indet		Pisa	44	53	Quartz + Quartzite	48	45	27	42	1	1.7	Pebble	Polyhedron	sub-angular	inner plan	fine/medium-grained	4	P_34	One	Long	3 - Exhausted	Perpendicular	flake, bladelet	Conforti	14	4	Soft	493
3444	P34	Fragmented	Meso-Proximal	10	9	1.11111	1	Production	Flake	1-25	Lateral	Linear	Rectilinear	Broken	flat	0	1-Unidirectional		Pisa	44	53	Quartz + Quartzite	48	45	27	42	1	1.7	Pebble	Polyhedron	sub-angular	inner plan	fine/medium-grained	4	P_34	One	Long	3 - Exhausted	Perpendicular	flake, bladelet	Conforti	14	4	Soft	493
3420	P34	Integer	Integer	12	14	0.857143	5	Production	Backed flake	26-50	Lateral back	Irregular	Convex	Plunging	flat	0	1-Unidirectional		Pisa	44	53	Quartz + Quartzite	48	45	27	42	1	1.7	Pebble	Polyhedron	sub-angular	inner plan	fine/medium-grained	4	P_34	One	Long	3 - Exhausted	Perpendicular	flake, bladelet	Conforti	14	4	Soft	493
3446	P34	Fragmented	Lateral	11	5	2.2	1	Production	Flake	0		Irregular	Rectilinear	Feather	flat	0	2-Bidirectional		Pisa	44	53	Quartz + Quartzite	48	45	27	42	1	1.7	Pebble	Polyhedron	sub-angular	inner plan	fine/medium-grained	4	P_34	One	Long	3 - Exhausted	Perpendicular	flake, bladelet	Conforti	14	4	Soft	493
3443	P34	Integer	Integer	9	10	0.9	4	Production	Flake	0		Linear	Concave	Feather	flat	0	1-Unidirectional		Pisa	44	53	Quartz + Quartzite	48	45	27	42	1	1.7	Pebble	Polyhedron	sub-angular	inner plan	fine/medium-grained	4	P_34	One	Long	3 - Exhausted	Perpendicular	flake, bladelet	Conforti	14	4	Soft	493
3418	P34	Integer	Integer	14	7	2	6	Production	Bladelet	1-25	Distal	Irregular	Rectilinear	Feather	flat	0	2-Bidirectional		Pisa	44	53	Quartz + Quartzite	48	45	27	42	1	1.7	Pebble	Polyhedron	sub-angular	inner plan	fine/medium-grained	4	P_34	One	Long	3 - Exhausted	Perpendicular	flake, bladelet	Conforti	14	4	Soft	493
3404	P34	Integer	Integer	25	17	1.47059	5	Production	Core	26-50	Lateral back				flatparalelepiped	2	2-Bidirectional		Pisa	44	53	Quartz + Quartzite	48	45	27	42	1	1.7	Pebble	Polyhedron	sub-angular	inner plan	fine/medium-grained	4	P_34	One	Long	3 - Exhausted	Perpendicular	flake, bladelet	Conforti	14	4	Soft	493
3405	P34	Integer	Integer	13	11	1.18182	6	Production	Core	26-50	Transversal				flatparalelepiped	1	2-Bidirectional		Pisa	44	53	Quartz + Quartzite	48	45	27	42	1	1.7	Pebble	Polyhedron	sub-angular	inner plan	fine/medium-grained	4	P_34	One	Long	3 - Exhausted	Perpendicular	flake, bladelet	Conforti	14	4	Soft	493
3406	P34	Fragmented	Lateral	10	5	2	4	Initialization	Flake	Total	Total	Irregular	Rectilinear	Feather	flat	0	Indet		Pisa	44	53	Quartz + Quartzite	48	45	27	42	1	1.7	Pebble	Polyhedron	sub-angular	inner plan	fine/medium-grained	4	P_34	One	Long	3 - Exhausted	Perpendicular	flake, bladelet	Conforti	14	4	Soft	493
3407	P34	Integer	Integer	8	9	0.888889	2	Initialization	Flake	76-99	Semi-total	Linear	Rectilinear	Hinged	flat	0	1-Unidirectional		Pisa	44	53	Quartz + Quartzite	48	45	27	42	1	1.7	Pebble	Polyhedron	sub-angular	inner plan	fine/medium-grained	4	P_34	One	Long	3 - Exhausted	Perpendicular	flake, bladelet	Conforti	14	4	Soft	493
3408	P34	Integer	Integer	27	12	2.25	10	Production	Bladelet	1-25	Lateral	Irregular	Concave	Plunging	flat	0	2-Bidirectional		Pisa	44	53	Quartz + Quartzite	48	45	27	42	1	1.7	Pebble	Polyhedron	sub-angular	inner plan	fine/medium-grained	4	P_34	One	Long	3 - Exhausted	Perpendicular	flake, bladelet	Conforti	14	4	Soft	493
3409	P34	Fragmented	Composite	23	20	1.15	7	Production	Chunk	26-50	Lateral	Irregular				0	1-Unidirectional		Pisa	44	53	Quartz + Quartzite	48	45	27	42	1	1.7	Pebble	Polyhedron	sub-angular	inner plan	fine/medium-grained	4	P_34	One	Long	3 - Exhausted	Perpendicular	flake, bladelet	Conforti	14	4	Soft	493
3410	P34	Integer	Integer	13	5	2.6	2	Initialization	Bladelet	76-99	Semi-total	Irregular	Rectilinear	Feather	flat	0	Indet		Pisa	44	53	Quartz + Quartzite	48	45	27	42	1	1.7	Pebble	Polyhedron	sub-angular	inner plan	fine/medium-grained	4	P_34	One	Long	3 - Exhausted	Perpendicular	flake, bladelet	Conforti	14	4	Soft	493
3411	P34	Integer	Integer	12	5	2.4	1	Production	Bladelet	0		Irregular	Rectilinear	Hinged	flat	0	2-Bidirectional		Pisa	44	53	Quartz + Quartzite	48	45	27	42	1	1.7	Pebble	Polyhedron	sub-angular	inner plan	fine/medium-grained	4	P_34	One	Long	3 - Exhausted	Perpendicular	flake, bladelet	Conforti	14	4	Soft	493
3412	P34	Integer	Integer	13	7	1.85714	1	Initialization	Flake	76-99	Semi-total	Linear	Rectilinear	Broken	flat	0	Indet		Pisa	44	53	Quartz + Quartzite	48	45	27	42	1	1.7	Pebble	Polyhedron	sub-angular	inner plan	fine/medium-grained	4	P_34	One	Long	3 - Exhausted	Perpendicular	flake, bladelet	Conforti	14	4	Soft	493
3413	P34	Integer	Integer	25	14	1.78571	5	Production	Flake	51-75	Semi-total	Trapeze	Rectilinear	Hinged	flat	0	2-Bidirectional		Pisa	44	53	Quartz + Quartzite	48	45	27	42	1	1.7	Pebble	Polyhedron	sub-angular	inner plan	fine/medium-grained	4	P_34	One	Long	3 - Exhausted	Perpendicular	flake, bladelet	Conforti	14	4	Soft	493
3414	P34	Integer	Integer	24	16	1.5	4	Production	Flake	26-50	Lateral	Irregular	Concave	Feather	flat	0	3-Orthogonal		Pisa	44	53	Quartz + Quartzite	48	45	27	42	1	1.7	Pebble	Polyhedron	sub-angular	inner plan	fine/medium-grained	4	P_34	One	Long	3 - Exhausted	Perpendicular	flake, bladelet	Conforti	14	4	Soft	493
3415	P34	Integer	Integer	19	10	1.9	5	Production	Core	0					poligonal	2	2-Bidirectional		Pisa	44	53	Quartz + Quartzite	48	45	27	42	1	1.7	Pebble	Polyhedron	sub-angular	inner plan	fine/medium-grained	4	P_34	One	Long	3 - Exhausted	Perpendicular	flake, bladelet	Conforti	14	4	Soft	493
3422	P34	Fragmented	Composite	13	7	1.85714	6	Production	Chunk	1-25	Transversal	Irregular				0	Indet		Pisa	44	53	Quartz + Quartzite	48	45	27	42	1	1.7	Pebble	Polyhedron	sub-angular	inner plan	fine/medium-grained	4	P_34	One	Long	3 - Exhausted	Perpendicular	flake, bladelet	Conforti	14	4	Soft	493
3417	P34	Fragmented	Composite	19	11	1.72727	8	Production	Chunk	1-25	Transversal	Irregular				0	2-Bidirectional		Pisa	44	53	Quartz + Quartzite	48	45	27	42	1	1.7	Pebble	Polyhedron	sub-angular	inner plan	fine/medium-grained	4	P_34	One	Long	3 - Exhausted	Perpendicular	flake, bladelet	Conforti	14	4	Soft	493
3433	P34	Integer	Integer	16	8	2	4	Production	Bladelet	1-25	Lateral	Irregular	Rectilinear	Broken	flat	0	2-Bidirectional		Pisa	44	53	Quartz + Quartzite	48	45	27	42	1	1.7	Pebble	Polyhedron	sub-angular	inner plan	fine/medium-grained	4	P_34	One	Long	3 - Exhausted	Perpendicular	flake, bladelet	Conforti	14	4	Soft	493
3419	P34	Fragmented	Composite	12	10	1.2	5	Production	Chunk	51-75	Semi-total	Irregular				0	1-Unidirectional		Pisa	44	53	Quartz + Quartzite	48	45	27	42	1	1.7	Pebble	Polyhedron	sub-angular	inner plan	fine/medium-grained	4	P_34	One	Long	3 - Exhausted	Perpendicular	flake, bladelet	Conforti	14	4	Soft	493
3421	P34	Fragmented	Meso-Distal	11	9	1.22222	5	Initialization	Flake	51-75	Semi-total	Irregular	Rectilinear	Plunging	flat	0	1-Unidirectional		Pisa	44	53	Quartz + Quartzite	48	45	27	42	1	1.7	Pebble	Polyhedron	sub-angular	inner plan	fine/medium-grained	4	P_34	One	Long	3 - Exhausted	Perpendicular	flake, bladelet	Conforti	14	4	Soft	493
3445	P34	Fragmented	Lateral	10	3	3.33333	1	Production	Flake	0		Linear	Rectilinear	Feather	flat	0	1-Unidirectional		Pisa	44	53	Quartz + Quartzite	48	45	27	42	1	1.7	Pebble	Polyhedron	sub-angular	inner plan	fine/medium-grained	4	P_34	One	Long	3 - Exhausted	Perpendicular	flake, bladelet	Conforti	14	4	Soft	493
3423	P34	Integer	Integer	14	7	2	3	Production	Bladelet	26-50	Lateral	Irregular	Twisted	Feather	flat	0	1-Unidirectional		Pisa	44	53	Quartz + Quartzite	48	45	27	42	1	1.7	Pebble	Polyhedron	sub-angular	inner plan	fine/medium-grained	4	P_34	One	Long	3 - Exhausted	Perpendicular	flake, bladelet	Conforti	14	4	Soft	493
3424	P34	Fragmented	Composite	12	8	1.5	3	Production	Chunk	0		Irregular				0	2-Bidirectional		Pisa	44	53	Quartz + Quartzite	48	45	27	42	1	1.7	Pebble	Polyhedron	sub-angular	inner plan	fine/medium-grained	4	P_34	One	Long	3 - Exhausted	Perpendicular	flake, bladelet	Conforti	14	4	Soft	493
3425	P34	Fragmented	Composite	12	3	4	4	Production	Chunk	0		Irregular				0	Indet		Pisa	44	53	Quartz + Quartzite	48	45	27	42	1	1.7	Pebble	Polyhedron	sub-angular	inner plan	fine/medium-grained	4	P_34	One	Long	3 - Exhausted	Perpendicular	flake, bladelet	Conforti	14	4	Soft	493
3426	P34	Fragmented	Composite	10	8	1.25	4	Production	Chunk	76-99	Semi-total	Irregular				0	1-Unidirectional		Pisa	44	53	Quartz + Quartzite	48	45	27	42	1	1.7	Pebble	Polyhedron	sub-angular	inner plan	fine/medium-grained	4	P_34	One	Long	3 - Exhausted	Perpendicular	flake, bladelet	Conforti	14	4	Soft	493
3427	P34	Fragmented	Composite	15	7	2.14286	4	Production	Chunk	26-50	Lateral	Irregular				0	1-Unidirectional		Pisa	44	53	Quartz + Quartzite	48	45	27	42	1	1.7	Pebble	Polyhedron	sub-angular	inner plan	fine/medium-grained	4	P_34	One	Long	3 - Exhausted	Perpendicular	flake, bladelet	Conforti	14	4	Soft	493
3428	P34	Fragmented	Composite	10	5	2	6	Production	Chunk	26-50	Lateral	Irregular				0	1-Unidirectional		Pisa	44	53	Quartz + Quartzite	48	45	27	42	1	1.7	Pebble	Polyhedron	sub-angular	inner plan	fine/medium-grained	4	P_34	One	Long	3 - Exhausted	Perpendicular	flake, bladelet	Conforti	14	4	Soft	493
3429	P34	Integer	Integer	18	9	2	9	Initialization	Bladelet	51-75	Semi-total	Irregular	Rectilinear	Plunging	flat	0	3-Orthogonal		Pisa	44	53	Quartz + Quartzite	48	45	27	42	1	1.7	Pebble	Polyhedron	sub-angular	inner plan	fine/medium-grained	4	P_34	One	Long	3 - Exhausted	Perpendicular	flake, bladelet	Conforti	14	4	Soft	493
3432	P34	Integer	Integer	17	13	1.30769	4	Production	Backed flake	26-50	Lateral back	Irregular	Concave	Broken	flat	0	2-Bidirectional		Pisa	44	53	Quartz + Quartzite	48	45	27	42	1	1.7	Pebble	Polyhedron	sub-angular	inner plan	fine/medium-grained	4	P_34	One	Long	3 - Exhausted	Perpendicular	flake, bladelet	Conforti	14	4	Soft	493
3416	P34	Integer	Integer	18	12	1.5	7	Production	Core	1-25	Lateral				poligonal	2	2-Bidirectional		Pisa	44	53	Quartz + Quartzite	48	45	27	42	1	1.7	Pebble	Polyhedron	sub-angular	inner plan	fine/medium-grained	4	P_34	One	Long	3 - Exhausted	Perpendicular	flake, bladelet	Conforti	14	4	Soft	493
3476	P35	Fragmented	Lateral	14	7	2	3	Production	Flake	0		Irregular	Rectilinear	Broken	flat	0	2-Bidirectional		Pisa	39	65 (50)	Quartz + Quartzite	45	36	28	48	1.2	1.6	Chunk	Polyhedron	angular	inner plan	fine/medium-grained	3	P_35	One	Long	3 - Exhausted	Perpendicular	flake, bladelet	Conforti	17	5	Hard	333
3478	P35	Fragmented	Composite	14	6	2.33333	4	Production	Chunk	1-25	Proximal	Irregular				0	1-Unidirectional		Pisa	39	65 (50)	Quartz + Quartzite	45	36	28	48	1.2	1.6	Chunk	Polyhedron	angular	inner plan	fine/medium-grained	3	P_35	One	Long	3 - Exhausted	Perpendicular	flake, bladelet	Conforti	17	5	Hard	333
3474	P35	Fragmented	Composite	12	5	2.4	5	Production	Chunk	1-25	Proximal	Irregular				0	2-Bidirectional		Pisa	39	65 (50)	Quartz + Quartzite	45	36	28	48	1.2	1.6	Chunk	Polyhedron	angular	inner plan	fine/medium-grained	3	P_35	One	Long	3 - Exhausted	Perpendicular	flake, bladelet	Conforti	17	5	Hard	333
3468	P35	Integer	Integer	11	9	1.22222	4	Production	Flake	0		Irregular	Rectilinear	Hinged	flat	0	2-Bidirectional		Pisa	39	65 (50)	Quartz + Quartzite	45	36	28	48	1.2	1.6	Chunk	Polyhedron	angular	inner plan	fine/medium-grained	3	P_35	One	Long	3 - Exhausted	Perpendicular	flake, bladelet	Conforti	17	5	Hard	333
3469	P35	Fragmented	Meso-Proximal	16	6	2.66667	7	Production	Bladelet	0		Irregular	Twisted	Broken	flat	0	2-Bidirectional		Pisa	39	65 (50)	Quartz + Quartzite	45	36	28	48	1.2	1.6	Chunk	Polyhedron	angular	inner plan	fine/medium-grained	3	P_35	One	Long	3 - Exhausted	Perpendicular	flake, bladelet	Conforti	17	5	Hard	333
3470	P35	Fragmented	Meso-Proximal	16	6	2.66667	6	Production	Bladelet	0		Triangular	Twisted	Broken	flat	0	1-Unidirectional		Pisa	39	65 (50)	Quartz + Quartzite	45	36	28	48	1.2	1.6	Chunk	Polyhedron	angular	inner plan	fine/medium-grained	3	P_35	One	Long	3 - Exhausted	Perpendicular	flake, bladelet	Conforti	17	5	Hard	333
3471	P35	Integer	Integer	13	8	1.625	4	Production	Flake	0		Irregular	Rectilinear	Feather	flat	0	1-Unidirectional		Pisa	39	65 (50)	Quartz + Quartzite	45	36	28	48	1.2	1.6	Chunk	Polyhedron	angular	inner plan	fine/medium-grained	3	P_35	One	Long	3 - Exhausted	Perpendicular	flake, bladelet	Conforti	17	5	Hard	333
3472	P35	Fragmented	Composite	10	10	1	5	Production	Chunk	26-50	Transversal	Irregular				0	Indet		Pisa	39	65 (50)	Quartz + Quartzite	45	36	28	48	1.2	1.6	Chunk	Polyhedron	angular	inner plan	fine/medium-grained	3	P_35	One	Long	3 - Exhausted	Perpendicular	flake, bladelet	Conforti	17	5	Hard	333
3473	P35	Fragmented	Composite	12	4	3	5	Production	Chunk	0		Irregular				0	2-Bidirectional		Pisa	39	65 (50)	Quartz + Quartzite	45	36	28	48	1.2	1.6	Chunk	Polyhedron	angular	inner plan	fine/medium-grained	3	P_35	One	Long	3 - Exhausted	Perpendicular	flake, bladelet	Conforti	17	5	Hard	333
3486	P35	Fragmented	Meso-Proximal	11	8	1.375	3	Production	Flake	0		Triangular	Rectilinear	Broken	flat	0	1-Unidirectional		Pisa	39	65 (50)	Quartz + Quartzite	45	36	28	48	1.2	1.6	Chunk	Polyhedron	angular	inner plan	fine/medium-grained	3	P_35	One	Long	3 - Exhausted	Perpendicular	flake, bladelet	Conforti	17	5	Hard	333
3477	P35	Integer	Integer	10	7	1.42857	3	Production	Flake	0		Irregular	Twisted	Feather	flat	0	2-Bidirectional		Pisa	39	65 (50)	Quartz + Quartzite	45	36	28	48	1.2	1.6	Chunk	Polyhedron	angular	inner plan	fine/medium-grained	3	P_35	One	Long	3 - Exhausted	Perpendicular	flake, bladelet	Conforti	17	5	Hard	333
3466	P35	Integer	Integer	11	14	0.785714	4	Production	Flake	0		Trapeze	Rectilinear	Feather	flat	0	2-Bidirectional		Pisa	39	65 (50)	Quartz + Quartzite	45	36	28	48	1.2	1.6	Chunk	Polyhedron	angular	inner plan	fine/medium-grained	3	P_35	One	Long	3 - Exhausted	Perpendicular	flake, bladelet	Conforti	17	5	Hard	333
3479	P35	Integer	Integer	10	7	1.42857	2	Production	Flake	0		Irregular	Rectilinear	Feather	flat	0	1-Unidirectional		Pisa	39	65 (50)	Quartz + Quartzite	45	36	28	48	1.2	1.6	Chunk	Polyhedron	angular	inner plan	fine/medium-grained	3	P_35	One	Long	3 - Exhausted	Perpendicular	flake, bladelet	Conforti	17	5	Hard	333
3480	P35	Integer	Integer	12	7	1.71429	1	Production	Flake	0		Linear	Twisted	Feather	flat	0	1-Unidirectional		Pisa	39	65 (50)	Quartz + Quartzite	45	36	28	48	1.2	1.6	Chunk	Polyhedron	angular	inner plan	fine/medium-grained	3	P_35	One	Long	3 - Exhausted	Perpendicular	flake, bladelet	Conforti	17	5	Hard	333
3481	P35	Integer	Integer	11	5	2.2	1	Production	Flake	0		Linear	Twisted	Feather	flat	0	1-Unidirectional		Pisa	39	65 (50)	Quartz + Quartzite	45	36	28	48	1.2	1.6	Chunk	Polyhedron	angular	inner plan	fine/medium-grained	3	P_35	One	Long	3 - Exhausted	Perpendicular	flake, bladelet	Conforti	17	5	Hard	333
3482	P35	Integer	Integer	11	5	2.2	1	Production	Bladelet	26-50	Lateral	Triangular	Rectilinear	Hinged	flat	0	1-Unidirectional		Pisa	39	65 (50)	Quartz + Quartzite	45	36	28	48	1.2	1.6	Chunk	Polyhedron	angular	inner plan	fine/medium-grained	3	P_35	One	Long	3 - Exhausted	Perpendicular	flake, bladelet	Conforti	17	5	Hard	333
3483	P35	Integer	Integer	12	3	4	2	Initialization	Bladelet	51-75	Transversal	Irregular	Twisted	Feather	flat	0	Indet		Pisa	39	65 (50)	Quartz + Quartzite	45	36	28	48	1.2	1.6	Chunk	Polyhedron	angular	inner plan	fine/medium-grained	3	P_35	One	Long	3 - Exhausted	Perpendicular	flake, bladelet	Conforti	17	5	Hard	333
3484	P35	Fragmented	Meso-Proximal	10	3	3.33333	4	Production	Bladelet	0		Irregular	Rectilinear	Broken	flat	0	2-Bidirectional		Pisa	39	65 (50)	Quartz + Quartzite	45	36	28	48	1.2	1.6	Chunk	Polyhedron	angular	inner plan	fine/medium-grained	3	P_35	One	Long	3 - Exhausted	Perpendicular	flake, bladelet	Conforti	17	5	Hard	333
3485	P35	Fragmented	Composite	12	6	2	4	Production	Chunk	1-25	Transversal	Irregular				0	2-Bidirectional		Pisa	39	65 (50)	Quartz + Quartzite	45	36	28	48	1.2	1.6	Chunk	Polyhedron	angular	inner plan	fine/medium-grained	3	P_35	One	Long	3 - Exhausted	Perpendicular	flake, bladelet	Conforti	17	5	Hard	333
3475	P35	Integer	Integer	10	7	1.42857	5	Production	Flake	0		Irregular	Convex	Feather	flat	0	1-Unidirectional		Pisa	39	65 (50)	Quartz + Quartzite	45	36	28	48	1.2	1.6	Chunk	Polyhedron	angular	inner plan	fine/medium-grained	3	P_35	One	Long	3 - Exhausted	Perpendicular	flake, bladelet	Conforti	17	5	Hard	333
3457	P35	Fragmented	Composite	16	9	1.77778	8	Production	Chunk	1-25	Proximal	Irregular				0	1-Unidirectional		Pisa	39	65 (50)	Quartz + Quartzite	45	36	28	48	1.2	1.6	Chunk	Polyhedron	angular	inner plan	fine/medium-grained	3	P_35	One	Long	3 - Exhausted	Perpendicular	flake, bladelet	Conforti	17	5	Hard	333
3449	P35	Integer	Integer	19	8	2.375	4	Production	Bladelet	1-25	Transversal	Irregular	Concave	Plunging	flat	0	2-Bidirectional		Pisa	39	65 (50)	Quartz + Quartzite	45	36	28	48	1.2	1.6	Chunk	Polyhedron	angular	inner plan	fine/medium-grained	3	P_35	One	Long	3 - Exhausted	Perpendicular	flake, bladelet	Conforti	17	5	Hard	333
3450	P35	Integer	Integer	21	9	2.33333	8	Production	Core	0					flatparalelepiped	2	2-Bidirectional		Pisa	39	65 (50)	Quartz + Quartzite	45	36	28	48	1.2	1.6	Chunk	Polyhedron	angular	inner plan	fine/medium-grained	3	P_35	One	Long	3 - Exhausted	Perpendicular	flake, bladelet	Conforti	17	5	Hard	333
3451	P35	Integer	Integer	18	8	2.25	8	Production	Bladelet	26-50	Transversal	Irregular	Concave	Plunging	flat	0	2-Bidirectional		Pisa	39	65 (50)	Quartz + Quartzite	45	36	28	48	1.2	1.6	Chunk	Polyhedron	angular	inner plan	fine/medium-grained	3	P_35	One	Long	3 - Exhausted	Perpendicular	flake, bladelet	Conforti	17	5	Hard	333
3452	P35	Integer	Integer	18	12	1.5	3	Production	Flake	0		Irregular	Rectilinear	Feather	flat	0	2-Bidirectional		Pisa	39	65 (50)	Quartz + Quartzite	45	36	28	48	1.2	1.6	Chunk	Polyhedron	angular	inner plan	fine/medium-grained	3	P_35	One	Long	3 - Exhausted	Perpendicular	flake, bladelet	Conforti	17	5	Hard	333
3453	P35	Fragmented	Composite	24	12	2	11	Production	Chunk	0		Irregular				0	2-Bidirectional		Pisa	39	65 (50)	Quartz + Quartzite	45	36	28	48	1.2	1.6	Chunk	Polyhedron	angular	inner plan	fine/medium-grained	3	P_35	One	Long	3 - Exhausted	Perpendicular	flake, bladelet	Conforti	17	5	Hard	333
3454	P35	Integer	Integer	18	14	1.28571	8	Production	Flake	1-25	Proximal	Irregular	Rectilinear	Broken	flat	0	2-Bidirectional		Pisa	39	65 (50)	Quartz + Quartzite	45	36	28	48	1.2	1.6	Chunk	Polyhedron	angular	inner plan	fine/medium-grained	3	P_35	One	Long	3 - Exhausted	Perpendicular	flake, bladelet	Conforti	17	5	Hard	333
3455	P35	Integer	Integer	24	12	2	7	Production	Bladelet	0		Irregular	Rectilinear	Plunging	flat	0	2-Bidirectional		Pisa	39	65 (50)	Quartz + Quartzite	45	36	28	48	1.2	1.6	Chunk	Polyhedron	angular	inner plan	fine/medium-grained	3	P_35	One	Long	3 - Exhausted	Perpendicular	flake, bladelet	Conforti	17	5	Hard	333
3467	P35	Integer	Integer	12	12	1	4	Production	Flake	0		Irregular	Convex	Feather	flat	0	2-Bidirectional		Pisa	39	65 (50)	Quartz + Quartzite	45	36	28	48	1.2	1.6	Chunk	Polyhedron	angular	inner plan	fine/medium-grained	3	P_35	One	Long	3 - Exhausted	Perpendicular	flake, bladelet	Conforti	17	5	Hard	333
3456	P35	Integer	Integer	20	12	1.66667	11	Production	Core	1-25	Lateral back				poligonal	1	2-Bidirectional		Pisa	39	65 (50)	Quartz + Quartzite	45	36	28	48	1.2	1.6	Chunk	Polyhedron	angular	inner plan	fine/medium-grained	3	P_35	One	Long	3 - Exhausted	Perpendicular	flake, bladelet	Conforti	17	5	Hard	333
3448	P35	Integer	Integer	20	7	2.85714	8	Production	Core	1-25	Lateral				Truncated pyramid/frustum	3	2-Bidirectional		Pisa	39	65 (50)	Quartz + Quartzite	45	36	28	48	1.2	1.6	Chunk	Polyhedron	angular	inner plan	fine/medium-grained	3	P_35	One	Long	3 - Exhausted	Perpendicular	flake, bladelet	Conforti	17	5	Hard	333
3458	P35	Fragmented	Composite	16	7	2.28571	9	Production	Chunk	26-50	Lateral	Irregular				0	2-Bidirectional		Pisa	39	65 (50)	Quartz + Quartzite	45	36	28	48	1.2	1.6	Chunk	Polyhedron	angular	inner plan	fine/medium-grained	3	P_35	One	Long	3 - Exhausted	Perpendicular	flake, bladelet	Conforti	17	5	Hard	333
3459	P35	Fragmented	Composite	16	10	1.6	9	Production	Chunk	26-50	Transversal	Irregular				0	2-Bidirectional		Pisa	39	65 (50)	Quartz + Quartzite	45	36	28	48	1.2	1.6	Chunk	Polyhedron	angular	inner plan	fine/medium-grained	3	P_35	One	Long	3 - Exhausted	Perpendicular	flake, bladelet	Conforti	17	5	Hard	333
3460	P35	Fragmented	Composite	17	10	1.7	7	Production	Chunk	1-25	Lateral back	Irregular				0	2-Bidirectional		Pisa	39	65 (50)	Quartz + Quartzite	45	36	28	48	1.2	1.6	Chunk	Polyhedron	angular	inner plan	fine/medium-grained	3	P_35	One	Long	3 - Exhausted	Perpendicular	flake, bladelet	Conforti	17	5	Hard	333
3461	P35	Integer	Integer	19	7	2.71429	3	Initialization	Bladelet	51-75	Semi-total	Irregular	Twisted	Feather	flat	0	2-Bidirectional		Pisa	39	65 (50)	Quartz + Quartzite	45	36	28	48	1.2	1.6	Chunk	Polyhedron	angular	inner plan	fine/medium-grained	3	P_35	One	Long	3 - Exhausted	Perpendicular	flake, bladelet	Conforti	17	5	Hard	333
3462	P35	Integer	Integer	15	5	3	6	Production	Bladelet	26-50	Lateral	Irregular	Rectilinear	Feather	flat	0	1-Unidirectional		Pisa	39	65 (50)	Quartz + Quartzite	45	36	28	48	1.2	1.6	Chunk	Polyhedron	angular	inner plan	fine/medium-grained	3	P_35	One	Long	3 - Exhausted	Perpendicular	flake, bladelet	Conforti	17	5	Hard	333
3463	P35	Integer	Integer	14	11	1.27273	4	Production	Flake	0		Irregular	Rectilinear	Feather	flat	0	2-Bidirectional		Pisa	39	65 (50)	Quartz + Quartzite	45	36	28	48	1.2	1.6	Chunk	Polyhedron	angular	inner plan	fine/medium-grained	3	P_35	One	Long	3 - Exhausted	Perpendicular	flake, bladelet	Conforti	17	5	Hard	333
3464	P35	Fragmented	Lateral	12	8	1.5	3	Production	Flake	1-25	Lateral	Irregular	Rectilinear	Feather	flat	0	2-Bidirectional		Pisa	39	65 (50)	Quartz + Quartzite	45	36	28	48	1.2	1.6	Chunk	Polyhedron	angular	inner plan	fine/medium-grained	3	P_35	One	Long	3 - Exhausted	Perpendicular	flake, bladelet	Conforti	17	5	Hard	333
3465	P35	Integer	Integer	16	9	1.77778	3	Production	Flake	0		Irregular	Rectilinear	Feather	flat	0	2-Bidirectional		Pisa	39	65 (50)	Quartz + Quartzite	45	36	28	48	1.2	1.6	Chunk	Polyhedron	angular	inner plan	fine/medium-grained	3	P_35	One	Long	3 - Exhausted	Perpendicular	flake, bladelet	Conforti	17	5	Hard	333
106	P4	Fragmented	Mesial	13	8	1.625	1	Production	Flake	0		Linear	Rectilinear	Broken	flat	0	4-Multidirectional		Pisa	29	39	Radiolarite	44	33	26	28	1.3	1.6	Pebble	Polyhedron	angular	inner plan	medium-grained	1	P_4	Two	Long + Short	3 - Exhausted	Perpendicular	flake, bladelet	Conforti	11	4	Hard	320
95	P4	Integer	Integer	5	3	1.66667	2	Production	Bladelet	26-50	Lateral back	Linear	Twisted	Feather	flat	0	2-Bidirectional		Pisa	29	39	Radiolarite	44	33	26	28	1.3	1.6	Pebble	Polyhedron	angular	inner plan	medium-grained	1	P_4	Two	Long + Short	3 - Exhausted	Perpendicular	flake, bladelet	Conforti	11	4	Hard	320
104	P4	Integer	Integer	6	11	0.545455	2	Production	Flake	0		Irregular	Rectilinear	Feather	flat	0	1-Unidirectional		Pisa	29	39	Radiolarite	44	33	26	28	1.3	1.6	Pebble	Polyhedron	angular	inner plan	medium-grained	1	P_4	Two	Long + Short	3 - Exhausted	Perpendicular	flake, bladelet	Conforti	11	4	Hard	320
105	P4	Integer	Integer	12	7	1.71429	1	Production	Flake	0		Linear	Wavy	Feather	flat	0	1-Unidirectional		Pisa	29	39	Radiolarite	44	33	26	28	1.3	1.6	Pebble	Polyhedron	angular	inner plan	medium-grained	1	P_4	Two	Long + Short	3 - Exhausted	Perpendicular	flake, bladelet	Conforti	11	4	Hard	320
102	P4	Fragmented	Meso-Distal	15	12	1.25	2	Initialization	Flake	26-50	Lateral	Linear	Wavy	Feather	flat	0	2-Bidirectional		Pisa	29	39	Radiolarite	44	33	26	28	1.3	1.6	Pebble	Polyhedron	angular	inner plan	medium-grained	1	P_4	Two	Long + Short	3 - Exhausted	Perpendicular	flake, bladelet	Conforti	11	4	Hard	320
107	P4	Fragmented	Mesial	10	10	1	2	Production	Flake	0		Linear	Wavy	Feather	flat	0	3-Orthogonal		Pisa	29	39	Radiolarite	44	33	26	28	1.3	1.6	Pebble	Polyhedron	angular	inner plan	medium-grained	1	P_4	Two	Long + Short	3 - Exhausted	Perpendicular	flake, bladelet	Conforti	11	4	Hard	320
109	P4	Integer	Integer	11	6	1.83333	1	Production	Flake	0		Linear	Rectilinear	Feather	flat	0	1-Unidirectional		Pisa	29	39	Radiolarite	44	33	26	28	1.3	1.6	Pebble	Polyhedron	angular	inner plan	medium-grained	1	P_4	Two	Long + Short	3 - Exhausted	Perpendicular	flake, bladelet	Conforti	11	4	Hard	320
110	P4	Integer	Integer	10	12	0.833333	2	Production	Flake	0		Linear	Rectilinear	Hinged	flat	0	1-Unidirectional		Pisa	29	39	Radiolarite	44	33	26	28	1.3	1.6	Pebble	Polyhedron	angular	inner plan	medium-grained	1	P_4	Two	Long + Short	3 - Exhausted	Perpendicular	flake, bladelet	Conforti	11	4	Hard	320
101	P4	Integer	Integer	10	12	0.833333	2	Production	Backed flake	1-25	Lateral back	Linear	Rectilinear	Hinged	flat	0	1-Unidirectional		Pisa	29	39	Radiolarite	44	33	26	28	1.3	1.6	Pebble	Polyhedron	angular	inner plan	medium-grained	1	P_4	Two	Long + Short	3 - Exhausted	Perpendicular	flake, bladelet	Conforti	11	4	Hard	320
100	P4	Fragmented	Meso-Proximal	10	10	1	1	Production	Backed flake	1-25	Lateral back	Linear	Rectilinear	Broken	flat	0	1-Unidirectional		Pisa	29	39	Radiolarite	44	33	26	28	1.3	1.6	Pebble	Polyhedron	angular	inner plan	medium-grained	1	P_4	Two	Long + Short	3 - Exhausted	Perpendicular	flake, bladelet	Conforti	11	4	Hard	320
99	P4	Fragmented	Meso-Proximal	10	15	0.666667	2	Production	Flake	1-25	Proximal	Linear	Wavy	Broken	flat	0	1-Unidirectional		Pisa	29	39	Radiolarite	44	33	26	28	1.3	1.6	Pebble	Polyhedron	angular	inner plan	medium-grained	1	P_4	Two	Long + Short	3 - Exhausted	Perpendicular	flake, bladelet	Conforti	11	4	Hard	320
108	P4	Fragmented	Proximal	7	10	0.7	1	Production	Flake	0		Linear	Rectilinear	Broken	flat	0	1-Unidirectional		Pisa	29	39	Radiolarite	44	33	26	28	1.3	1.6	Pebble	Polyhedron	angular	inner plan	medium-grained	1	P_4	Two	Long + Short	3 - Exhausted	Perpendicular	flake, bladelet	Conforti	11	4	Hard	320
[truncated: 550 more rows]

## Sheet: Experiments
	backed flake	blade	bladelet	flake	spall	chunk	core	Total	Raw_Material	Initial_Height	Initial_Width	Initial_Thickness	Initial_Weight	Core_Lenght/Width	Core_Lenght/Thickness	Blank	Volumetry	Roundness	Alteration	Texture	N_Reduction_sequence	ID_reduction_sequences	N_Axes	Exploited_Axes	Reduction_Intensity	Gesture	Objective	Knapper	Hammerstone	Anvil	Hammer_Hardness	Hammer_Weight
[truncated: 105 more rows]

[truncated: 1 more sheets: Anvil and Hammerstones]
