# Supplementary material for: Not just a technique! An experimental approach to refine the definition of the bipolar anvil reduction in the Uluzzian
Source: Springer Nature journal article supplement (doi:10.1007/s12520-024-02097-z), 2024-11-28
Supplement: MOESM3 [file 12520_2024_2097_MOESM3_ESM.docx]

Davide Delpiano1, Giulia Marciani1, Jacopo Conforti1, Serena Lombardo, Matteo Rossini, Marcos César Pereira Santos, Stefano Benazzi, Marco Peresani *2, Adriana Moroni 2

*Corresponding author

1 Sharing first name, these authors equally contributed to the paper.

2 Sharing last name, these authors equally contributed to the paper.

### Supplementay Information SI.3 - Bipolar code - RStudio Version 1.4.1106 ###

library(MASS)

library(rgl)

install.packages("rlang")

library("tidyverse")

install.packages("ggplot2")

install.packages("pillar", type="binary")

install.packages("scales")

install.packages("FactoMineR")

library(ggplot2)

library(FactoMineR)

library(scales)

Mydb<-Bipolar_Database (Sheet 2)

### subsets ###

Products <- subset(Mydb, Techno_Category == "Flake" | Techno_Category == "Backed flake" | Techno_Category == "Blade" | Techno_Category == "Bladelet" | Techno_Category == "Spall")

Products_All <- subset(Mydb, Techno_Category == "Flake" | Techno_Category == "Backed flake" | Techno_Category == "Blade" | Techno_Category == "Bladelet" | Techno_Category == "Spall" | Techno_Category == "Chunk")

integer <- subset(Products, Integrity == "Integer")

Cores <- subset(Mydb, Techno_Category == "Core")

MeasuredCores <- subset(Cores, Lab == "Pisa" | Lab=="Ferrara")

MeasuredProducts <- subset(Products, Lab == "Pisa" | Lab=="Ferrara")

### Products description ###

ggplot(Products_All, aes(Techno_Category, fill=Techno_Category))

+ geom_bar() + scale_fill_hue(c = 40) + theme(legend.position="none") + geom_text(aes(label = ..count..), stat = "count", vjust = 1.5, colour = "white")

ggplot(Products_All, aes(Techno_Category, fill=Lab))

+ geom_bar(position = "dodge") + scale_fill_hue(c = 40)

ggplot(Products_All, aes(Integrity, fill=Fragment_Type))

+ geom_bar() + scale_x_discrete (limits = c("Integer", "Fragmented")) + scale_fill_hue(c = 40)

ggplot(Products, aes(Techno_Category, Lenght, colour=Techno_Category))

+ geom_boxplot()

ggplot(Products, aes(Width, Lenght, colour=Techno_Category))

+ geom_jitter() + geom_smooth(method=lm, se=FALSE) + stat_ellipse(level = 0.95, lwd = 1)

ggplot(Products, aes(Lenght, fill=Techno_Category))

+ geom_histogram(binwidth = 5, position = "dodge") + geom_density(kernel = "gaussian")

ggplot(Products, aes(Lenght, colour=Techno_Category))

+ geom_density(kernel = "gaussian", size=1)

ggplot(Products, aes(Width, colour=Techno_Category))

+ geom_density(kernel = "gaussian", size=1)

ggplot(Products, aes(Thickness, colour=Techno_Category))

+ geom_density(kernel = "gaussian", size=1)

ggplot(Products, aes(Lenght/Width, colour=Techno_Category))

+ geom_density(kernel = "gaussian", size=1)

ggplot(integer, aes(Lenght/Thickness, colour=Techno_Category))

+ geom_density(kernel = "gaussian", size=1)

ggplot(integer, aes(Techno_Category, Lenght/Thickness, colour=Techno_Category))

+ geom_boxplot()

ggplot(integer, aes(Thickness, Lenght, colour=Techno_Category))

+ geom_jitter() + stat_ellipse(level = 0.95, lwd = 1)

ggplot(integer, aes(Lenght/Width, colour=Techno_Category))

+ geom_density(kernel = "gaussian", size=1)

ggplot(integer, aes(Techno_Category, Lenght/Width, colour=Techno_Category))

+ geom_boxplot()

ggplot(integer, aes(Width, Lenght, colour=Techno_Category))

+ geom_jitter() + stat_ellipse(level = 0.95, lwd = 1)

ggplot(Products, aes(Techno_Category, Lenght/Width, colour=Lab))

+ geom_boxplot()

ggplot(Products, aes(Raw_Material, Lenght/Width, colour=Lab))

+ geom_boxplot()

ggplot(Products, aes(Thickness/Width, colour=Techno_Category))

+ geom_density(kernel = "gaussian", size=1)

ggplot(Products, aes(Thickness, colour=Techno_Category))

+ geom_density(adjust = 1.75, size = 1)

ggplot(Products, aes(Thickness, colour=Techno_Category))

+ geom_density(kernel = "gaussian", size=1)

ggplot(Products, aes(Width, colour=Techno_Category))

+ geom_density(kernel = "gaussian", size=1)

ggplot(Products, aes(Techno_Category, fill=Section))

+ geom_bar((aes(fill = Section)), position = "fill") + scale_y_continuous(labels = percent_format()) + scale_fill_hue(c = 40)

ggplot(Products, aes(Techno_Category, fill=Curvature_profile))

+ geom_bar((aes(fill = Curvature_profile)), position = "fill") + scale_y_continuous(labels = percent_format()) + scale_fill_hue(c = 40)

ggplot(Products, aes(Techno_Category, fill=Flake_Ending))

+ geom_bar((aes(fill = Flake_Ending)), position = "fill") + scale_y_continuous(labels = percent_format()) + scale_fill_hue(c = 40)

ggplot(Products, aes(Techno_Category, fill=Integrity))

+ geom_bar((aes(fill = Fragment_Type)), position = "fill") + scale_y_continuous(labels = percent_format()) + scale_fill_hue(c = 40)

ggplot(Products, aes(Techno_Category, fill=Position_Cortex))

+ geom_bar((aes(fill = Position_Cortex)), position = "fill") + scale_y_continuous(labels = percent_format()) + scale_fill_hue(c = 40)

ggplot(Products, aes(Techno_Category, fill=Quantity_Cortex))

+ geom_bar((aes(fill = Quantity_Cortex)), position = "fill") + scale_y_continuous(labels = percent_format()) + scale_fill_hue(c = 40)

ggplot(Products, aes(Techno_Category, fill=Direction_Removals))

+ geom_bar((aes(fill = Direction_Removals)), position = "fill") + scale_y_continuous(labels = percent_format()) + scale_fill_hue(c = 40)

ggplot(Mydb, aes(Lenght, colour=Techno_Category))

+ geom_density(kernel = "gaussian")

ggplot(Mydb, aes(Width, Lenght, colour=Techno_Category))

+ geom_jitter() + geom_smooth(method=lm, se=FALSE) + stat_ellipse(level = 0.95, lwd = 1)

ggplot(Mydb, aes(Width, Thickness, colour=Techno_Category))

+ geom_jitter() + geom_smooth(method=lm, se=FALSE) + stat_ellipse(level = 0.95, lwd = 1)

ggplot(Mydb, aes(Width, Lenght, colour=Quantity_Cortex))

+ geom_jitter() + geom_smooth(method=lm, se=FALSE) + stat_ellipse(level = 0.95, lwd = 1)

ggplot(Mydb, aes(Blank, fill=Techno_Category))

+ geom_bar(position=position_dodge()) + geom_density(alpha=.2, fill="#FF6666")

ggplot(Mydb, aes(Blank, fill=Techno_Category))

+ geom_bar((aes(fill = Techno_Category)), position = "fill") + scale_y_continuous(labels = percent_format())

ggplot(Mydb, aes(Width, Lenght, colour=Blank))

+ geom_jitter() + geom_smooth(method=lm, se=FALSE) + stat_ellipse(level = 0.95, lwd = 1)

### Experiments productivity in relation to blanks ###

ggplot(Mydb, aes(Blank, fill=Techno_Category))

+ geom_bar((aes(fill = Techno_Category)), position = "fill") + scale_y_continuous(labels = percent_format()) + scale_fill_hue(c = 40)

ggplot(Mydb, aes(Techno_Category, fill=Blank))

+ geom_bar((aes(fill = Blank)), position = "fill") + scale_y_continuous(labels = percent_format()) + scale_fill_hue(c = 40)

ggplot(Mydb, aes(Roundness, fill=Techno_Category))

+ geom_bar((aes(fill = Techno_Category)), position = "fill") + scale_y_continuous(labels = percent_format()) + scale_fill_hue(c = 40) + scale_x_discrete (limits = c("rounded", "sub-angular", "angular"))

ggplot(Mydb, aes(Techno_Category, fill=Roundness))

+ geom_bar((aes(fill = Roundness)), position = "fill") + scale_y_continuous(labels = percent_format()) + scale_fill_hue(c = 40)

ggplot(Mydb, aes(Volumetry, fill=Techno_Category))

+ geom_bar((aes(fill = Techno_Category)), position = "fill") + scale_y_continuous(labels = percent_format()) + scale_fill_hue(c = 40)

ggplot(Mydb, aes(Techno_Category, fill=Volumetry))

+ geom_bar((aes(fill = Volumetry)), position = "fill") + scale_y_continuous(labels = percent_format()) + scale_fill_hue(c = 40)

ggplot(Mydb, aes(Texture, fill=Techno_Category))

+ geom_bar((aes(fill = Techno_Category)), position = "fill") + scale_y_continuous(labels = percent_format()) + scale_fill_hue(c = 40)+ scale_x_discrete (limits = c("fine-grained", "fine/medium-grained", "medium-grained", "coarse-grained"))

ggplot(Mydb, aes(Techno_Category, fill=Texture))

+ geom_bar((aes(fill = Texture)), position = "fill") + scale_y_continuous(labels = percent_format()) + scale_fill_hue(c = 40)

ggplot(Mydb, aes(Raw_Material, fill=Techno_Category))

+ geom_bar((aes(fill = Techno_Category)), position = "fill") + scale_y_continuous(labels = percent_format()) + scale_fill_hue(c = 40)

ggplot(Mydb, aes(Techno_Category, fill=Raw_Material))

+ geom_bar((aes(fill = Raw_Material)), position = "fill") + scale_y_continuous(labels = percent_format()) + scale_fill_hue(c = 40)

### Experiments productivity in relation to reduction sequences ###

ggplot(Mydb, aes(Stage, fill=Techno_Category))

+ geom_bar((aes(fill = Techno_Category)), position = "fill") + scale_y_continuous(labels = percent_format()) + scale_fill_hue(c = 40)

ggplot(Mydb, aes(Techno_Category, fill=Stage))

+ geom_bar((aes(fill = Stage)), position = "fill") + scale_y_continuous(labels = percent_format()) + scale_fill_hue(c = 40)

ggplot(Mydb, aes(Lab, fill=Techno_Category))

+ geom_bar((aes(fill = Techno_Category)), position = "fill") + scale_y_continuous(labels = percent_format()) + scale_fill_hue(c = 40)

ggplot(Mydb, aes(Techno_Category, fill=Lab))

+ geom_bar((aes(fill = Lab)), position = "fill") + scale_y_continuous(labels = percent_format()) + scale_fill_hue(c = 40)

ggplot(Mydb, aes(N_Axes, fill=Techno_Category))

+ geom_bar((aes(fill = Techno_Category)), position = "fill") + scale_y_continuous(labels = percent_format()) + scale_fill_hue(c = 40)

ggplot(Mydb, aes(Exploited_Axes, fill=Techno_Category))

+ geom_bar((aes(fill = Techno_Category)), position = "fill") + scale_y_continuous(labels = percent_format()) + scale_fill_hue(c = 40)

ggplot(Mydb, aes(N_Reduction_sequence, fill=Techno_Category))

+ geom_bar((aes(fill = Techno_Category)), position = "fill") + scale_y_continuous(labels = percent_format()) + scale_fill_hue(c = 40)

ggplot(Mydb, aes(Alteration, fill=Techno_Category))

+ geom_bar((aes(fill = Techno_Category)), position = "fill") + scale_y_continuous(labels = percent_format()) + scale_fill_hue(c = 40)

ggplot(Mydb, aes(Gesture, fill=Techno_Category))

+ geom_bar((aes(fill = Techno_Category)), position = "fill") + scale_y_continuous(labels = percent_format()) + scale_fill_hue(c = 40)

ggplot(Mydb, aes(Objective, fill=Techno_Category))

+ geom_bar((aes(fill = Techno_Category)), position = "fill") + scale_y_continuous(labels = percent_format()) + scale_fill_hue(c = 40)

ggplot(Mydb, aes(Knapper, fill=Techno_Category))

+ geom_bar((aes(fill = Techno_Category)), position = "fill") + scale_y_continuous(labels = percent_format()) + scale_fill_hue(c = 40)

### Quantity of products obtained ###

ggplot(Cores, aes(Texture, N_Products, colour=Lab))

+ geom_boxplot()

ggplot(Cores, aes(Knapper, N_Products, colour=Lab))

+ geom_boxplot()

ggplot(Cores, aes(Reduction_Intensity, N_Products, colour=Roundness))

+ geom_boxplot()

ggplot(Cores, aes(Reduction_Intensity, N_Products, colour=Texture))

+ geom_boxplot()

ggplot(Cores, aes(Reduction_Intensity, N_Products, colour=Alteration))

+ geom_boxplot()

ggplot(Cores, aes(Reduction_Intensity, N_Products, colour=N_Axes))

+ geom_boxplot()

ggplot(Cores, aes(Reduction_Intensity, N_Products, colour=Hammer_Hardness))

+ geom_boxplot()

ggplot(Cores, aes(Blank, N_Products, colour=Blank))

+ geom_boxplot()

ggplot(Cores, aes(Exploited_Axes, N_Products, colour=Exploited_Axes))

+ geom_boxplot()

### Products variability according to blanks, labs, reduction, hammers, etc. ###

ggplot(Mydb, aes(Hammer_Hardness, fill=Techno_Category))

+ geom_bar((aes(fill = Techno_Category)), position = "fill") + scale_y_continuous(labels = percent_format()) + scale_fill_hue(c = 40)

ggplot(Mydb, aes(Hammer_Hardness, fill=Integrity))

+ geom_bar((aes(fill = Integrity)), position = "fill") + scale_y_continuous(labels = percent_format()) + scale_fill_hue(c = 40)

ggplot(Mydb, aes(Hammer_Hardness, fill=Fragment_Type))

+ geom_bar((aes(fill = Fragment_Type)), position = "fill") + scale_y_continuous(labels = percent_format()) + scale_fill_hue(c = 40)

ggplot(Mydb, aes(N_Products, Hammer_Weight, colour=Lab))

+ geom_smooth(model = lm)

ggplot(Mydb, aes(N_Products, Hammer_Weight))

+ geom_point() + geom_smooth(model = lm)

ggplot(MeasuredCores, aes(Initial_Weight, N_Products))

+ geom_smooth(model = lm)

ggplot(MeasuredCores, aes(Initial_Weight, N_Products))

+ geom_point() + geom_smooth(model = lm)

ggplot(MeasuredProducts, aes(Initial_Height, Lenght))

+ geom_smooth(model = lm)

ggplot(MeasuredProducts, aes(Initial_Height, Lenght))

+ geom_point() + geom_smooth(model = lm)

ggplot(MeasuredProducts, aes(Initial_Height, Lenght/Width))

+ geom_smooth(model = lm)

ggplot(MeasuredProducts, aes(Initial_Height, Lenght/Width))

+ geom_point() + geom_smooth(model = lm)

ggplot(MeasuredProducts, aes(Initial_Weight, Lenght/Width))

+ geom_smooth(model = lm)

ggplot(MeasuredProducts, aes(Initial_Weight, Lenght/Width))

+ geom_point() + geom_smooth(model = lm)

ggplot(MeasuredProducts, aes(Lenght, Initial_Height))

+ geom_smooth(model = lm)

ggplot(Products, aes(Hammer_Weight, Lenght/Width))

+ geom_smooth(model = lm)

ggplot(Products, aes(Hammer_Weight, Lenght))

+ geom_smooth(model = lm)

ggplot(Products, aes(Hammer_Weight, Width))

+ geom_smooth(model = lm)

ggplot(Products, aes(Hammer_Weight, Thickness))

+ geom_smooth(model = lm) + facet_grid(. ~ Techno_Category)

ggplot(Mydb, aes(Hammer_Weight, N_Products, colour=Reduction_Intensity))

+ geom_smooth(model = lm)

ggplot(Cores, aes(Weight, N_Products, colour=Raw_Material))

+ geom_jitter() + geom_smooth(method=lm, se=FALSE) + stat_ellipse(level = 0.95, lwd = 1)

ggplot(Products, aes(Lenght/Width, colour=Raw_Material))

+ geom_density(kernel = "gaussian", size=1)

ggplot(Products, aes(Width, Lenght, colour=Raw_Material))

+ geom_jitter() + geom_smooth(method=lm, se=FALSE) + stat_ellipse(level = 0.95, lwd = 1)

ggplot(Products, aes(Lab, Lenght/Width, colour=Raw_Material))

+ geom_boxplot()

ggplot(Products, aes(Raw_Material, Lenght/Width, colour=Texture))

+ geom_boxplot()

ggplot(Products, aes(Techno_Category, Lenght/Width, colour=Texture))

+ geom_boxplot()

ggplot(Products, aes(Techno_Category, Lenght, colour=Texture))

+ geom_boxplot()

ggplot(Products, aes(Techno_Category, Thickness, colour=Texture))

+ geom_boxplot()

ggplot(Products, aes(Techno_Category, Thickness/Width, colour=Texture))

+ geom_boxplot()

ggplot(Cores, aes(Raw_Material, Lenght, colour=Reduction_Intensity))

+ geom_boxplot()

ggplot(Mydb, aes(Lab, fill=Techno_Category))

+ geom_bar((aes(fill = Techno_Category)), position = "fill") + scale_y_continuous(labels = percent_format())+ scale_fill_brewer(palette = "Greys")

For palette choices: library(RcolorBrewer) display.brewer.all()

ggplot(Mydb, aes(Reduction_Intensity, fill=Techno_Category))

+ geom_bar((aes(fill = Techno_Category)), position = "fill") + scale_y_continuous(labels = percent_format())+ scale_fill_brewer(palette = "Greys")

ggplot(Mydb, aes(Techno_Category, fill=Section))

+ geom_bar((aes(fill = Section)), position = "fill") + scale_y_continuous(labels = percent_format())+ scale_fill_hue(c = 40)

ggplot(Mydb, aes(Techno_Category, fill=Curvature_profile))

+ geom_bar((aes(fill = Curvature_profile)), position = "fill") + scale_y_continuous(labels = percent_format())+ scale_fill_brewer(palette = "Greys")

ggplot(Mydb, aes(Techno_Category, fill=Flake_Ending))

+ geom_bar((aes(fill = Flake_Ending)), position = "fill") + scale_y_continuous(labels = percent_format())+ scale_fill_brewer(palette = "Greys")

ggplot(Mydb, aes(Techno_Category, fill=Quantity_Cortex))

+ geom_bar((aes(fill = Quantity_Cortex)), position = "fill") + scale_y_continuous(labels = percent_format())+ scale_fill_brewer(palette = "Greys")

ggplot(Mydb, aes(Techno_Category, fill=Direction_Removals))

+ geom_bar((aes(fill = Direction_Removals)), position = "fill") + scale_y_continuous(labels = percent_format())+ scale_fill_brewer(palette = "Greys")

ggplot(Mydb, aes(Techno_Category, fill=Knapper))

+ geom_bar((aes(fill = Knapper)), position = "fill") + scale_y_continuous(labels = percent_format())+ scale_fill_brewer(palette = "Greys")

ggplot(Mydb, aes(Blank, fill=Integrity))

+ geom_bar((aes(fill = Integrity)), position = "fill") + scale_y_continuous(labels = percent_format())+ scale_fill_brewer(palette = "Greys")

ggplot(Mydb, aes(Techno_Category, fill=Integrity))

+ geom_bar((aes(fill = Integrity)), position = "fill") + scale_y_continuous(labels = percent_format())+ scale_fill_brewer(palette = "Greys")

ggplot(Mydb, aes(Techno_Category, fill=Objective))

+ geom_bar((aes(fill = Objective)), position = "fill") + scale_y_continuous(labels = percent_format())+ scale_fill_brewer(palette = "Greys")

ggplot(Mydb, aes(Knapper, fill=Integrity))

+ geom_bar((aes(fill = Integrity)), position = "fill") + scale_y_continuous(labels = percent_format())+ scale_fill_brewer(palette = "Greys")

ggplot(Mydb, aes(Gesture, fill=Techno_Category))

+ geom_bar((aes(fill = Techno_Category)), position = "fill") + scale_y_continuous(labels = percent_format())+ scale_fill_brewer(palette = "Greys")

ggplot(Mydb, aes(Knapper, fill=Techno_Category))

+ geom_bar((aes(fill = Techno_Category)), position = "fill") + scale_y_continuous(labels = percent_format())+ scale_fill_brewer(palette = "Greys")

ggplot(Mydb, aes(Quantity_Cortex, fill=Techno_Category))

+ geom_bar((aes(fill = Techno_Category)), position = "fill") + scale_y_continuous(labels = percent_format())

ggplot(Mydb, aes(Direction_Removals, fill=Techno_Category))

+ geom_bar((aes(fill = Techno_Category)), position = "fill") + scale_y_continuous(labels = percent_format())

ggplot(Mydb, aes(N_Axes, fill=Techno_Category))

+ geom_bar((aes(fill = Techno_Category)), position = "fill") + scale_y_continuous(labels = percent_format())

ggplot(Mydb, aes(Exploited_Axes, fill=Techno_Category))

+ geom_bar((aes(fill = Techno_Category)), position = "fill") + scale_y_continuous(labels = percent_format())

ggplot(Mydb, aes(Lenght/Width, Thickness, shape=Techno_Category, colour=Techno_Category))

+ geom_jitter() + geom_smooth(method=lm, se=FALSE),

ggplot(Mydb, aes(Direction_Removals, Lenght/Width))

+ geom_boxplot(fill="steelblue"),

ggplot(Mydb, aes(Width, Lenght, colour=Techno_Category))

+ geom_point() + stat_ellipse(level = 0.95, lwd = 1) + facet_grid(vars(N_Axes),vars(Lab))

ggplot(Mydb, aes(Techno_Category, Lenght, colour=Lab))

+ geom_boxplot()

ggplot(Mydb, aes(Techno_Category, Lenght, colour=Blank))

+ geom_boxplot()

ggplot(Mydb, aes(Techno_Category, Lenght, colour=Quantity_Cortex))

+ geom_boxplot()

ggplot(Mydb, aes(Width, Lenght, colour=Lab))

+ geom_jitter() + geom_smooth(method=lm, se=FALSE) + stat_ellipse(level = 0.95, lwd = 1)

ggplot(Mydb, aes(Width, Thickness, colour=Lab))

+ geom_jitter() + geom_smooth(method=lm, se=FALSE) + stat_ellipse(level = 0.95, lwd = 1)

ggplot(Mydb, aes(Width, Lenght, colour=Lab, shape=Lab))

+ geom_jitter() + geom_smooth(method=lm, se=FALSE)
