# Supplementary material for: Not just a technique! An experimental approach to refine the definition of the bipolar anvil reduction in the Uluzzian
Source: Springer Nature journal article supplement (doi:10.1007/s12520-024-02097-z), 2024-11-28
Supplement: MOESM4 [file 12520_2024_2097_MOESM4_ESM.xlsx]

## Sheet: Ethnograpic evidences
N.	Site	Continent	Country	Lithological group	Raw material	Blank type	Blank size	Gesture	Main bipolar goal	flake generic	thick flakes	large flakes	sharp-edges flakes	small and thin flakes	blade-bladelets generic	Fragments / chunks / splinters	Splintered pieces / use of bipolar core residues as tools	Bipolar products used as blanks for polished ornaments	Multiple use / objectives of bipolar knapping	References	Notes
1	Several sites	North America	Canada	nd	nd	nd	nd	axial	Thick flakes			x								Shott 1989; Morice 1895; Teit 1900	core wrapped in straw or grass
2	Eastern Waiwai	South America	Brazil (Amazonia)	Sedimentary	sandstone	nd	nd	axial	Flakes	x						x			x	Prous 2009; Prous et al. 2014	grater teeths
3	Baniwà	South America	Brazil (Amazonia)	Metamorphics	gneiss and diabase	nd	nd	axial	Flakes	x						x			x	Prous 2009; Prous et al. 2014; Menestrino and Mentz Ribeiro 1995	grater teeths
4	Several sites	South America	Brazil (Mato Grosso, Pantanal de Càreres)	Minerals	agate	nd	nd	axial	Flakes	x	x						x	x	x	Migliacio 2006
5	Desana	South America	Colombia (Amazonia)	Minerals	quartz	nd	nd	axial	Flakes	x						x			x	Prous et al. 2014; Reichel-Dolmatoff 1997; Prous et al. 2010	grater teeths
6	Several sites of Xeta people	South America	Brazil (North-West Paraná)	Volcanics	silexite	nd	nd	axial, tangential	Flakes	x	x			x					x	Shott 1989; Miller 1979	production of flakes of various shape and size; core pleced in the ground; partially reotuched
7	Several sites of Gulena people	South America	Guyana (British Guyana)	nd	nd	nd	nd	axial	Flakes	x										Shott 1989; Roth 1924	wood anvil
8	Several sites	South America	Peru	Minerals	quartz	nd	nd	axial	Intermediate tools							x	x		x	Distel 1972/73
9	Several sites	Africa	Namibia / Angola (Kaokoveld desert)	Metamorphics	quartzite	blocks	nd	axial	Thin flakes			x		x					x	Hayden 1980; Shott 1989; Mac Calman and Grobbellar 1965	small flakes for slaughtering activities and probably large flakes for woodworking
10	Several sites	Africa	Tanzania	Minerals	quartz	nd	nd	tangential	Flakes	x										Hayden 1980; Shott 1989; Masao 1982	immersion in water of the blocks; selection of usable flakes after the exploitation (body incisions)
11	Several sites	Africa	Zimbabwe	nd	nd	nd	nd	axial	Thick flakes			x								Shott 1989; Robinson 1938	heat treatment
12	Konso people	Africa	Ethiopia	Minerals	quartz, agate	cores	small	axial	Thin flakes					x						Brandt and Weedman 2002; Brandt et al. 2016	Konso womans occasionally use bipolar knapping to reduce quartz and agate cores (using a hoe tip or a wooden mortar as anvil) - utilized for hide working
13	Several sites	Southern Asia	India	Minerals	chalcedony	nodules	nd	axial	Thin flakes				x							Kosambi 1967; Hayden 1980	use of bipolar flakes for animal castration by shepherds (men)
14	Several sites	Near Oceania	Papua-New Guinea (Lake Kopiago)	Cherts	chert	Cobbles and pebbles	small	nd	Flakes	x					x				x	White 1968; Strathern 1969; Sillitoe 1982; Shott, 1989	flakes use as microliths; bark string used for hold the core
15	Several sites	Near Oceania	Papua-New Guinea (Southern Highlands)	Cherts	chert	Cobbles	small	nd	Flakes	x										Sillitoe and Hardy, 2003	used with an handle or free-hand
16	Several sites	Near Oceania	Australia	Minerals	quartz, quartzite	pebble	small	axial	Thin flakes					x						Hayden 1980; White 1968; McCarthy et al., 1946	microliths of throwing weampons

## Sheet: Archaeological evidences
N.	Site	Continent	Country	Chronology	Lithological group	Raw material	Blank type	Blank size	Gesture	break the blocks / raw material test	Opening the pebbles / cobbles	Main bipolar goal	Flakes generic	Thick flat flakes	Big cortical-semicortical flakes	Quadrangular flakes	Sharp-edges flakes	Small and thin flakes	Elongated flakes	Blade-bladelets generic	batonnets / spalls	Thick bladelets	Sharp-edges bladelets	Small and thin bladelets	Façonnage / retouch	Core convexity control	Residual exploitation / maximize the exploitation	Fragments / chunks / splinters	Splintered pieces / use of bipolar core residues as tools	bipolar products used as blanks for polished axes	Multiple use / objectives of bipolar knapping	References	Notes
1	Debert	North America	Canada (Nova Scotia)	LP - 10.6 ka	Minerals	Chalcedony (poor quality)	nd	nd	axial			Flakes	x																			Goodyear 1993	22% of lithic artifacts are splintered pieces/bipolar cores
2	Several sites	North America	United States	LP/H - 13-9 ka	Cherts	Flint	Pebbles	small	axial			Flakes	x			x			x												x	Morgan et al. 2015
3	Canada Century site	North America	Canada	H - Lamoka - 3000-2000 BC	Cherts	Flint	Nodules and (probably) pebbles	nd	nd			Thin flakes			x			x													x	Lennox 1990
4	Hoko River	North America	United States, (Washington State)	H - Tahltan - 2500 BP	Minerals	Quartz	nd	nd	axial	x		Thin flakes		x	x		x	x													x	Flenniken 1981	big and flat flakes used as axes; small sharp-edge flakes used as bistoury cutting elements (microliths)
5	Escalante	North America	United States - (South-Central Arizona)	H - Hohokam - 2-0.6 ka	Volcanics	Obsidian	Pebbles	small	nd			Flakes					x															Goodyear 1993; Stafford 1981
6	Three Dog	Central America	Bahamas	H - 1.2-0.1 ka	Cherts	Imported chert	nd	nd	nd			Thin flakes						x														Berman et al. 1999	microliths and hafted tools
7	Teotihuacan	Central America	Messico	H - 0.7/0.8-0.1 ka	Volcanics	Obsidian	Water-rolles cobbles	small	nd			Flakes	x																			Carballo 2010
8	Pedra Furada	South America	Brazil (Piaui)	LP/H - 30-8 ka	Minerals	Quartz	nd	nd	axial		x	Thick flakes			x																x	Parenti 2001; Boeda 2014; Boeda et al. 2014b, 2016	retouched marginally
9	Sitio do Meio	South America	Brazil (Piaui)	LP/H - 30-8 ka	Minerals	Quartz	nd	nd	axial		x	Flakes	x																		x	Boeda et al. 2014a, 2016; Aimola et al. 2014	retouched marginally
10	Tira Peia	South America	Brazil (Piaui)	LP/H - 20-10 ka	Minerals	Quartz	nd	nd	axial		x	Thick flakes			x																x	Lahaye et al. 2013; Lourdeau 2019	retouched marginally
11	Lapo do Santo	South America	Brazil (Minas Gerais)	LP/H - 12.5-1 ka	Minerals	Quartz	Crystal and vein	nd	tangential			Thin flakes						x														Pugliese 2007; Moreno de Sousa and de Mello Araujo 2018	microliths
12	Several sites	South America	Brazil (Goias, Tocantins)	LP/H - 12-8 ka	Minerals	Quartz	nd	nd	axial		x	Thick flakes			x																x	Prous 2019	inverse retouch
13	Pedra Pintada, Gavião, Pequiá	South America	Brazil (Parà)	LP/H - 12.4-9 ka	Minerals	Quartz	Crystal and vein, pebbles	small (pebbles)	axial		x	Thin flakes						x													x	Duarte-Talim 2019	naturally used or briefly retouched
14	Several sites	South America	Brazil (Goias, Tocantins)	LP/H - 12-8 ka	Minerals	Quartz	Elongated pebbles	nd	axial		x	Thin flakes					x														x	Lourdeau 2010; Prous et al. 2010, 2014
15	Several sites	South America	Brazil (Minas Gerais)	LP/H - 11-1 ka	Minerals	Quartz	Crystal	nd	axial			Flakes	x																			Prous 1991; Prous et al. 2014	retouched and formal tools
16	Buritizeiro	South America	Brazil (Minas Gerais)	H - 10.5-6 ka	Minerals	Quartz	Pebbles	small	axial			Flakes	x							x											x	Bassi Alves 2012	naturally used
17	Bibocas V-VI	South America	Brazil (Minas Gerais)	H - 10.4-6 ka	Minerals	Quartz	Crystal and vein	nd	axial			Flakes				x				x											x	Bassi Alves 2012
18	Lapa das Boleiras	South America	Brazil (Minas Gerais)	H - 10-4.2 ka	Minerals	Quartz	Crystal and vein	nd	axial			Thin flakes						x														Pugliese 2007
19	Several sites	South America	Brazil (Piaui)	H - 8-3 ka	Minerals	Quartz	nd	nd	axial		x	Thick flakes			x																x	Pagli et al. 2016	partially retouched
20	Several sites	South America	Brazil (South/South-West, costal areas)	H - 7-0.5 ka	Minerals	Quartz	Vein	nd	axial			Thin flakes	x					x			x								x		x	Lima 1991; Souza 2013; Prous et al. 2014
21	Several sites	South America	Argentina (Pampas sea coast)	H - 7-0.5 ka	Volcanics	Basalt	Pebbles (good quality), nodules	small	axial			Flakes				x																Banegas et al. 2018
22	Several sites	South America	Argentina (Patagonian sea coast)	H - 7-0.5 ka	Cherts	Chert, basalt, obsidian and fossilized wood (good quality)	nd	nd	axial			Flakes				x																Banegas et al. 2018
23	Several sites	South America	Ecuador	H - 3-1 ka	Volcanics	Chert, basalt, andesite, Lutite	Thin oval pebbles	nd	axial			Thick flakes	x		x																x	Jackson and Donald 1987	partially retouched
24	Several sites	South America	Guyana	H - 3-1 ka	Minerals	Quartz	Thick round shape nodules	nd	axial and tangential			Flakes	x															x		x	x	Rostain 1995	grater teeths; scraping tools, cutting tools, drills
25	Rodriguez III	South America	Brazil (Pernambuco)	H - 3-0.5 ka	Minerals	Quartz	Crystal and vein	nd	axial and tangential			Flakes				x				x											x	Faustino 2019
26	Several sites	South America	Brazil (Mato Grosso)	H - 3-0.5 ka	Minerals	Quartz, agate, hematite, schists, quartzite, silicified limestone	nd	nd	axial			Flakes	x																			Prous et al. 2014
27	Several sites	South America	Brazil (Parà, Amazonia)	H - 2.2-1.4 ka	Volcanics	Silexite	Blocks, pebbles	nd	axial			Flakes	x															x			x	Rodet et al. 2013; Duarte-Talim 2012	retouched tools and grater teeths
28	Several sites	South America	Brazil (Paranà, Santa Catarina, Rio Grande do Sul)	H - 2-0.5 ka	Minerals	Chalcedony	Geodes, pebbles	nd	axial			Elongated products							x										x		x	Prous et al. 2010; Pereira Santos et al. 2016; Milheira and DeBlasis 2013
29	Several sites	South America	Brazil (Maranhao, Amazonia)	H - 2-0.5 ka	Cherts	Chert	nd	nd	axial			Façonnage													x					x		Prous et al. 2014; Costa 2003
30	Several sites	South America	Brazil (Minas Gerais)	H - 2-0.4 ka	Minerals	Hematite	Slabs	nd	axial and tangential			Façonnage													x					x		Prous et al. 2014; Souza 2013
31	Maranga	South America	Peru (central coast)	H - 1.8-0.4 ka	Volcanics	Andesite (oval pebbles)	Oval pebbles	nd	axial			Flakes	x	x																	x	Pérez et al. 2020
32	Several sites	South America	Brazil (Minas Gerais)	H - 1.7-0.2 ka	Minerals	Quartz	Crystal and vein	nd	axial			Elongated products							x									x			x	Prous et al. 2014; Rodrigues and Gardiman 2016	smallest fragments and powder used as pottery degreasers
33	Several sites	South America	Peru (Huamachuco)	H - 1.6-0.5 ka	Cherts	Chert, quartzite	nd	nd	Axial			Flakes	x																			Downey 2010	informal flaketools
34	Porto de Santarem	South America	Brazil (Amazonia)	H - 1.2-0.4 ka	Minerals	Quartz	nd	nd	axial			Flakes	x			x												x			x	Araujo da Silva and Pahl Schaan 2021	retouched tools (ie drills) and greter teeths
35	Dmanisi	Eastern Europe	Georgia	EP - 1.81-1.6 Ma	Minerals	Quartz	Pebbles	nd	axial			Flakes	x																			de Lumley et al. 2005	Bipolar knapping occasionally used
36	Pirro Nord	Mediterranean Europe	Italy (Apulia)	EP - 1.5-1.2 Ma	Cherts	Flint	Pebbles	small	axial			Flakes	x																			Arzarello et al. 2016	Bipolar knapping minimally represented for the exploitation of bad quality pebbles
37	Fuente Nueva, Barranco Leon	Mediterranean Europe	Spain	EP - Lower Paleolithic - 1.4-1.2 Ma	Sedimentary	Limestone, flint	Pebbles, blocks	small	axial			Thin flakes						x														Moyano et al. 2011
38	Ca' Belvedere di Monte Poggiolo	Mediterranean Europe	Italy (Romagna)	EP - 1 Ma	Sedimentary	flint, limestone	Spherical cobbles	nd	axial		x	Thick flakes		x																	x	Arzarello et al. 2016	Bipolar knapping is only used for opening spherical cobbles and thick flakes production
39	Untermassfeld	Western Europe	Germany (Thuringen)	EP - 1 Ma	Cherts	Chert, Rhyolite	Pebbles, cobble, tabular	nd	axial			Flakes					x															Roebroeks et al., 2018
40	Vallparadis	Mediterranean Europe	Spain (Barcelona)	EP/MP - 0.98-0.83 Ma	Minerals	Quartz (mostly), Flint, Lydite, Quartzite, Limestone	Clasts, pebbles, fragments, flakes	small	axial			Thick flakes		x	x													x				Garcia and Silva, 2013; Garcia et al. 2013	98,4% of cores are bipolar cores
41	Sierra de Atapuerca - layer TD6	Mediterranean Europe	Spain (Burgos)	EP/MP - > 800 ka	Minerals	Quartz	Pebbles, small cobbles	small	axial			Flakes	x																			Ollé et al. 2013
42	Baıraki	Eastern Europe	Moldávia	EP/MP - Early to Middle Pleistocene transition-Middle Pleistocene 800–450 k	Cherts	Flint	Pebbles	large	axial	x		Thick flakes	x		x												x				x	Anissutkine et al. 2019
43	Pont-de-Lavaud	Western Europe	France (Indre)	EP/MP - Lower Paleolithic - Early-Middle Pleistocene	Minerals	Quartz	Pebbles	nd	five bipolar knapping methods			Thick flakes		x																		de Lombera-Hermida et al. 2016
44	Tunel Wielki Cave	Eastern Europe	Poland	MP - 563-478 ka	Cherts	Local Jurassic flint	Nodules, flake	small and large	axial			Thick flakes	x	x																		Kot et al. 2022	good quality flint available near the site (no relation between size and quality of raw material and the use of bipolar knapping)
45	Schöningen	Western Europe	Germany	MP - Middle Pleistocene 478–424 k	Cherts	Flint	Pebbles	small	nd	x		Thin flakes	x					x													x	Van Kolfschoten et al. 2015
46	La Cansaladeta	Mediterranean Europe	Spain (Tarragona)	MP - Lower Palaeolithic- 424-374 ka	Minerals	Flint (bad quality), quartz, quartzite, basanite	Blocks (flint), pebbles (quartz, quartzite, basanite)	small	axial		x	Thin flakes						x													x	Yesilova et al. 2021	medium and small size flakes
47	Medzhibozh 1	Eastern Europe	Ukraine	MP - 373-399 ka	Metamorphics	Granite	Pebbles	large	axial	x		Flakes	x	x	x																x	Stepanchuk et al. 2021
48	Grotta Torre dell’Alto	Mediterranean Europe	Italy (Apulia, Salento)	LP - Middle Palaeolithic	Sedimentary	Local raw materials (limestone, dolomite and siliceous limestone) and flint (exogenous)	Pebbles (flint)	small (flint)	nd		x	Thick flakes	x	x	x																x	Ranaldo et al. 2022a, 2022b	Production of some of thickest tools of Level D with a backed cortical edge opposite to a sharp edge; smaller raw materials also exploited by other methods
49	La Chaise-de-Vouthon	Western Europe	France (Charente)	LP - Middle Palaeolithic	Metamorphics	Quartzite	Irregular pebbles	nd	nd		x	Flakes		x																	x	Matilla 2010
50	Grotta Guattari, Grotta Breuil	Mediterranean Europe	Italy (Latium)	LP - Middle Palaeolithic	Cherts	Flint	Pebbles	small	nd		x	Thick flakes			x																x	Bietti et al. 2010	cortical flakes retouched as side-scrapers
51	Bosses	Western Europe	France (Lot, Lamagdelaine)	LP - Middle Palaeolithic	Minerals	Quartz, quartzite	Flat pebbles	large	axial			Flakes	x																			Mourre 1996, 2004; Jarry et al. 2004; Mourre et al. 2010
52	Champ Grand	Western Europe	France (Saint-Maurice-sur-Loire, Loire)	LP - Middle Palaeolithic - Mousterian	Minerals	Quartz	Pebbles	nd	axial		x	Flakes	x																		x	Nicoud 2010	bipolar exploitation after the use of pebbles like hammerstones
53	Tares	Western Europe	France (Sourzac, Dordogne)	LP - Middle Palaeolithic - Mousterian	Cherts	Flint	Pebbles	large	axial			Thick flakes		x																		Faivre et al. 2010	split fractures; bipolar knapping on ground or knapping waste
54	Grotta di Fumane - layer A9	Mediterranean Europe	Italy (Veneto)	LP - Middle Palaeolithic - Mousterian - 47.6 ka	Cherts	Flints	Flakes	small and large	axial			Façonnage													x							Delpiano et al. 2019	retouching backed mousterian tools
55	Bacho Kiro - layer I/ level 11	Eastern Europe	Bulgaria	LP - Initial Upper Palaeolithic - 44.8-42.6 ka	Cherts	Allochthonous fine-grained flint	Flakes, blade fragment, indeterminable	small	axial			Thin flakes						x				x					x		x		x	Tsanova 2006	extreme exploitation of exogenous raw material by bipolar knapping and other methods; spalls obtained by bipolar knapping
56	Klissoura	Mediterranean Europe	Greece	LP - Upper Palaeolithic - Uluzzian - 40-39 ka	Cherts	Radiolarite (Mostly), Flint	Pebbles (mostly), flakes, cores	small	axial		x	Elongated products							x					x				x	x		x	Sitlivy 2016; Kaczanowska et al. 2010
57	Riparo Broion - 1f, 1g	Mediterranean Europe	Italy (Veneto)	LP - Uluzzian	Cherts	Cherts (mostly Biancone/Maiolica and Scaglia Variegata Alpina and, less, Scaglia Rossa)	Thick flakes (mostly), thin flakes, bladelets, blocks and plaques, retouched tools	small	axial and tangential			Elongated products						x			x			x			x				x	Peresani et al. 2019	high incidence of bipolar exploitation
58	Grotta di Fumane - layer 3A	Mediterranean Europe	Italy (Veneto)	LP - Uluzzian	Cherts	Flints (Maiolica, Scaglia rossa, Scaglia Variegata)	Flakes	not small	axial			Flakes	x					x	x	x											x	Peresani et al. 2016	low incidence of bipolar exploitation
59	Grotta La Fabbrica - layer 2	Mediterranean Europe	Italy (Tuscany)	LP - Uluzzian	Cherts	Jasper (mostly), Quartz, Flint, Chert, Quarzite, Siliceous Limestone	Rounded and elongates pebbles (Jasper, Flint, Quarzite, Siliceous Limestone), blocks (Quartz)	small and large	axial	x		Flakes	x						x	x							x		x		x	Villa et al. 2018	Many splintered/scaled pieces interpreted as intermediate tools; bipolar products were rarely selected as tool blanks
60	Colle Rotondo	Mediterranean Europe	Italy (Latium)	LP - Uluzzian	Cherts	Flint, Chert	Rounded flint (mostly) and chert pebbles and cobbles	small	axial			Flakes	x	x						x									x		x	Villa et al. 2018	Many splintered/scaled pieces interpreted as intermediate tools; bipolar products were rarely selected as tool blanks
61	Grotta di Castelcivita - - layers upper-rsi, pie, rpi, rsa''	Mediterranean Europe	Italy (Campania)	LP - Uluzzian	Cherts	Chert (mostly), quartz, quartzarenite, radiolarite (sporadic)	Thick flakes (mostly), blocks, pebbles, flakes, chunks	small and large	axial and tangential	x		Flakes	x					x	x	x				x			x				x	Rossini et al. 2022	high incidence of bipolar exploitation
62	Grotta Roccia San Sebastiano	Mediterranean Europe	Italy (Campania, Mondragone)	LP - Uluzzian	Cherts	Flint	Blocks, pebbles	small	axial			Thin flakes		x		x		x	x		x		x						x		x	Collina et al. 2020	Various products obtained from a wide range of blocks
63	Grotta-Riparo di Uluzzo C - layers C-D-E, SUs 3, 15, 17	Mediterranean Europe	Italy (Apulia)	LP - Uluzzian	Cherts	Chert (mostly), siliceous limestone, jasper (exogenous)	Flakes	small	axial			Thin Flakes	x					x		x							x		x		x	Silvestrini et al. 2021	flakes used for hide working
64	Grotta del Cavallo - layer EIII	Mediterranean Europe	Italy (Apulia)	LP - Uluzzian	Sedimentary	Greyish laminated siliceous limestone (mostly), exogenous radiolarite and flint	Slabs and "lastrine" fractions (limestone); pebbles (radiolarite and flint), flakes	small	axial and tangential		x	Elongated products	x					x	x	x	x	x		x	x						x	Moroni et al. 2018; Sano et al. 2019	high incidence of bipolar exploitation
65	Grotta Barbara	Mediterranean Europe	Italy (Latium)	LP - Upper Palaeolithic - Aurignacian	Cherts	Flint	Pebbles	small	tangential and axial		x	Thin flakes			x						x	x	x			x		x			x	D’Angelo and Mussi 2005	at least 3 bipolar bladelets methods (2 tangential and 1 axial for obtained thick or thin cortical and semicortical bladelets
66	Grotta del Fossellone	Mediterranean Europe	Italy (Latium)	LP - Upper Palaeolithic - Aurignacian	Cherts	Flint	Pebbles	small	nd		x	Flakes	x						x									x			x	Bietti et al. 2010
67	Grotta La Fabbrica - layers 3-4	Mediterranean Europe	Italy (Tuscany)	LP - Upper Palaeolithic - Aurignacian	Cherts	Jasper (mostly), Quartz, Flint, Chert, Quarzite, Siliceous Limestone	Pebbles, core residues, blades/flakes	small	axial			Flakes	x					x	x	x	x						x	x	x		x	Dini et al. 2012
68	Klissoura - layers IV, layer IV, IIId-g, IIIa-c	Mediterranean Europe	Greece	LP - Upper Palaeolthic - Aurignacian - 37.5-30 ka	Cherts	Radiolarite and Flint (mostly), quartz, chalcedony, silicified limestone	Flakes, pebbles, tools	small	axial			Thin flakes	x					x	x					x					x		x	Kaczanowska et al. 2010	very frequent splintered pieces often interpreted as cores; possibly elongated blanks production deducible from the analysis of splintered pieces negatives (pp. 216-217, 238-240, 253)
69	El Palomar	Mediterranean Europe	Spain (Southeast, Mallaetes)	LP - Upper Palaeolithic - Gravettian	Cherts	Flint (and others)	nd	nd	nd			Thin flakes					x	x													x	de la Pena Alonso and Vega-Toscano 2012, 2013	sharp-edge flakes used as microliths; recycling flint retouched tools by bipolar knapping
70	Kalavan 1	Eastern Europe	Armenia	LP - 14 ka	Volcanics	Obsidian, local siliceous rocks	nd	small	axial			Elongated products							x			x									x	Montoya et al. 2013
71	Riparo Salvini, Riparo Palidoro	Mediterranean Europe	Italy (Latium)	LP - Upper Palaeolithic- Epigravettian	Cherts	Flint	Pebbles	small	nd			Elongated products												x								Bietti et al. 2010
72	Dalmeri rockshelter	Mediterranean Europe	Italy (Italian Alps)	LP - Upper Palaeolithic - Late Epigravettian	Cherts	Flint	Bladelets	small and large	axial			Façonnage													x							Duches et al. 2018	manufacture of the lithic projectile implements
73	Grotta della Serratura-layer 10	Mediterranean Europe	Italy (Campania)	LP - Upper Palaeolithic- Final Epigravettian	Cherts	Flint	Pebbles	small	nd		x	Elongated products						x	x						x		x		x		x	Ricci et al. 2019; Vadillo Conesa et al. 2021
74	La Tourasse - Layer C-D	Western Europe	France (Haute-Garonne - Saint-Martory)	LP - Upper Palaeolithic - Azilien - Dryas 3 - Boreal	Cherts	Flint	nd	nd	axial			Flakes	x																x		x	Orliac 1972	flake production and maybe also intermediate pieces
75	Klissoura - layers II a-dII a-d, 3-5	Mediterranean Europe	Greece	LP/H - Upper Palaeolithic - Epigravettian (14 ka) / Mesolithic (10 ka)	Cherts	Radiolarite, Flint (mostly), mudstone (Epigravettian); Radiolarite (mostly), obsidian (Mesolithic)	Exausted cores, flakes (Epigravettian) / chunks, flakes, blades, exhausted cores, tools, tabular concretion (Mesolithic)	small	axial			Thin flakes						x	x					x			x		x		x	Kaczanowska et al. 2010	raw material residual exploitation by bipolar knapping; possibly elongated blanks production deducible from the analysis of splintered pieces negatives (pp. 272, 281-283)
76	Riparo Fredian, La Murella XIII	Mediterranean Europe	Italy (Tuscany - Garfagnana)	LP/H - Final Epigravettian -Sauveterrian	Cherts	Chert, Flint, Radiolarite	Free-hand direct percussion products/residues	small	axial			Flakes	x														x					Lombardo 2020; Lombardo and Tozzi 2023; Conforti et al. 2021	residual exploitation (very small) of local raw material
77	Several sites	Western Europe	Portugal	LP/H - Upper Palaeolithic-Mesolithic	Cherts	Flint and quartz (poor quality)	Irregular blocks (chert)	small (chert)	nd			Elongated products	x						x	x											x	Almeida 2007; Aubry et al. 1997; Zilhao et al. 1997	a part of pieces are used as microliths
78	Several sites	Western Europe	France (Massif armoricain)	LP/H - Epipaleolithic-Mesolithic-Neolithic	Cherts	Flint	Pebbles	small and large	axial		x	Thick flakes	x	x						x								x	x		x	Guyodo and Marchand 2005	thick pieces retouched as end-scrapers and drills
79	Lepenski Vir	Eastern Europe	Serbia (Iron Gates, Danubio River)	H - Mesolithic	Cherts	Flint	Pebbles	nd	nd		x	Flakes	x							x											x	Mitrovic 2018, 2022
80	Vlasac I	Eastern Europe	Serbia (Iron Gates, Danubio River)	H - Mesolithic	Metamorphics	Quartzite	Pebbles	nd	nd		x	Flakes	x							x											x	Mitrovic 2018, 2022
81	Font del Ros	Mediterranean Europe	Spain (Catalunya)	H - Mesolithic - 10.2-8.4 ka	Cherts	Flint and quartz (mostly) - poor quality	Irregular cobble (quartz), tabular nodules (flint) and freehand core residus	small	axial			Flakes	x			x					x						x	x	x		x	Roda Gilabert et al. 2015	many limestone, sandstone and quartzite anvil 80% of flint flakes and 20% of quartz flakes; bipolar knapping as adaptation to poor quality raw material exploitation
82	Several sites	Western Europe	Netherlands (Swifterbant)	H - Late Mesolithic-Early Neolithic 5-3.4 ka	Cherts	Flint	Nodules	small	axial			Flakes	x		x			x		x									x		x	Devriendt 2011
83	Several sites	Northern Europe	Sweden-Finland	H - Mesolithic-Neolithic	Minerals	Quartz	nd	nd	nd			Flakes	x	x	x		x	x						x				x			x	Knutsson et al. 2015	cutting elements (for bone dager and other composite tools)
84	Several sites	Northern Europe	Sweden	H - Mesolithic-Neolithic	Minerals	Quartz, quartzite, flint	nd	nd	tangential and axial			Thin flakes	x		x		x	x													x	Callahan 1987	quarzite thick flakes used as axes (probably handled); flint exploited with tangential gesture; flint flakes always retouched
85	Several sites	Northern Europe	Norway	H - Mesolithic-Neolithic	Volcanics	Rhyolite, flint	Pebbles, cores, blades/flakes	small	axial			Flakes	x											x					x		x	Ballin 1999	High number of bipolar cores (45-100%); only in the late mesolithic the bipolar cores are scarce (12%); the author does not believe to a sistematic production of microblades by bipolar knapping
86	Trasanello cementificio	Mediterranean Europe	Italy (Basilicata, Matera)	H - Early-Middle Neolithic	Cherts	Flint, Chert, Radiolarites, Obsidian	Pebbles, unretouched flakes, tools, exploited cores	small	axial			Thin flakes	x					x									x		x		x	Conforti and Parisi 2018	residual exploitation of local and exogenous lithic resources
87	A Guaita	Mediterranean Europe	France (Haute Corse)	H - Early- Middle- Recent Neolithic - 6th-4th millennium BC	Minerals	Quartz	Vein	nd	axial (mostly) and tangential			Elongated products		x				x	x	x							x				x	Lorenzi et al. 2021
88	Tivulaghjiu	Mediterranean Europe	France (Corse-du-Sud)	H - Middle Neolithic - end of 5th millennium BC	Volcanics	Obsidian	nd	nd	nd			Thin flakes					x	x											x		x	Tramoni et al. 2007; Costa 2001
89	Beg ar Loued, Guernic	Western Europe	France (Massif armoricain)	H - Late- Final Neolithic	Cherts	Flint	Pebbles	nd	nd			Thick flakes			x						x								x		x	Donnart et al. 2009
90	Several sites	Eastern Europe	Polonia (Zulawy region)	H - Rzucewo culture - Late Neolithic 2700 BC	Cherts	Flint (mostly pomeranian)	nd	nd	axial			Flakes	x		x					x		x							x	x	x	Januszek 2010	supports for polished end-scrapers, side-scrapers, axes and drills
91	Sollacaro - I Calanchi-Sapar'alta / Piani di U Grecu	Mediterranean Europe	France (Corse-du-Sud)	H - Final Neolithic - Terrinien - end of 3th millennium BC	Volcanics	Rhyolite, flint, obsidian, quartz	Pebbles	nd	nd			Thin flakes					x	x									x	x	x		x	Remincourt et al. 2016; Costa 2001	quartz used as degreasers for pottery
92	Several sites	Western Europe	France (South-East)	H - Copper Age - Bell Beaker culture	Cherts	Flint	Pebbles	nd	tangential and axial			Flakes	x																x		x	Furestier 2010	tangential bipolar knapping similar to the free-hand direct percussion
93	Coppa Nevigata	Mediterranean Europe	Italy (Apulia, Foggia)	H - Bronze Age	Cherts	Chert (local)	Pebbles	nd	nd		x	Flakes	x		x			x											x		x	Vilmercati 2022
94	Several sites	Northern Europe	Lithuania (Kernavé and Naudvaris sites)	H - Late Bronze Age- Iron Age - 1ka BC-1 AD	Cherts	Flint	Erratic blocks and patinated older knapped artifacts	small	axial			Thin flakes						x											x		x	Piliciauskas and Osipowicz 2010	poor quality and small flint adaptation; no use wears on bipolar products; no use like as strike-a-lights fro firemaking; woodworking?
95	Lomekwi 3	Africa	Kenya (West Turkana)	Late Pliocene - 3.3 Ma	Volcanics	Phonolite, trachy-phonolite, basalt	Cobbles and cobble fragments	large	axial			Flakes	x																			Harmand et al. 2015
96	Sterkfontein M5, Swartkrans M1	Africa	South Africa	EP - 2.2-1.7 Ma	Minerals	Quartz, quartzite	Clasts, blocks	small and large	axial			Flakes	x																			Caruana 2017	Bipolar knapping interpreted as a more opportunistic method for flakes production
97	Omo site 123	Africa	Ethiopia	EP - Olduwan - 2 Ma	Cherts	Chert	Irregular fragments, pebble fragments	small	axial			Flakes	x																			de la Torre 2004	Omo 123 (only 0,2% of collection show bipolar knapping stigmas)
98	Fejej FJ-Ia	Africa	Ethiopia	EP - Olduwan - 1.9 Ma	Minerals	Quartz	Pebbles	nd	axial			Flakes	x																			Barsky et al. 2011
99	HWK EE	Africa	Tanzania (Olduvai Gorge)	EP - Late Olduwan	Metamorphics	Quartzite, Lava, Chert	Blocks, cores (Quartzite and Flint), flat cobbles (Lava)	small and large	axial		x	Flakes	x																		x	de la Torre and Mora 2018b	bipolar knapping marginally represented; some of regular flakes can be related to bipolar knapping
100	Rietputs 15	Africa	South Africa	EP - 1.7–1.2 Ma	Volcanics	Andesite	Pebbles	large	axial	x		Thick flakes	x		x																x	Kuman and Gibbon 2017
101	Several sites	Africa	Tanzania (Olduvai Gorge)	EP - Lower Palaeolithic	Minerals	Quartz	Rounded nodules	small	axial			Flakes	x				x											x				Diez-Martin et al. 2009a, 2010; Gurtov et al. 2014	most suitable/easiest technique for the quartz exploitation
102	EF-HR	Africa	Tanzania (Olduvai Gorge)	EP - Early Acheulean	Metamorphics	Quartzite, Lava	Blocks	nd	axial			Flakes	x																			de la Torre and Mora 2018a	bipolar knapping marginally represented
103	Thomas Quarry I-L1	Africa	Marocco (Casablanca)	EP - Lower Palaeolithic- Acheulean	Cherts	Flint	Elongated pebbles (good quality)	nd	nd			Elongated products							x	x											x	Gallotti et al. 2020	marginally present
104	Melka Kunture - Garba III	Africa	Ethiopia	MP - Early MSA	Volcanics	Obsidian	Pebbles	small	nd		x	Flakes	x																x		x	Mussi et al. 2014	more bipolar products retouched as tools
105	Several sites	Africa	nd	MP/LP - MSA	Minerals	Quartz and other raw materials	nd	nd	nd			Thin flakes						x						x			x				x	de la Pena 2015	partially used as microliths
106	Leba Cave	Africa	Angola	MP/LP - MSA	Cherts	Chert, Quartz, Siltstone, Quartzite	Cobbles and pebbles	small	tangential and axial			Thin flakes						x	x	x				x							x	de Matos and Pereira 2020
107	Mnaraeka	Africa	Tanzania (Kilwa basin)	MP/LP - MSA	Minerals	Quartz, Chert, Quartzite	Cobbles and pebbles	small and large	axial		x	Thin flakes	x		x			x													x	Beyin and Ryano 2020	bipolar knapping used for the exploitation of small quartz cobbles and pebbles but also as split method on rounded chert and quartzite cobbles to create core blanks ideal for the centripetal Levallois mode of reduction
108	Mumba Rockshelter Bed VIA	Africa	Tanzania (Northern region)	LP - MSA - 131-63 ka	Minerals	Quartz (mostly), basalt, chert, quartzite, others	Cobbles, cobbles fragments	nd	axial			Flakes	x																			Bushozi et al. 2020	Few backed pieces knapped through the bipolar technology; bipolar knapping much less frequent than Bed V; bipolar knapping related to quartz exploitation
109	Ounjougou	Africa	Mali (Dogon)	LP - MSA	Minerals	Quartz, sandstones, quartzite	Pebbles	nd	nd		x	Flakes	x								x										x	Soriano et al. 2010a, 2010b	flake partially retouched as side-scrapers
110	Putslaagte 8 - layers F14-1, C 23-20	Africa	South Africa	LP - MSA/ Howiesons Poort/ Late MSA - MIS 5-3 - 81-33 ka	Metamorphics	Hornfels, Quartzite, Quartz	Cobbles and pebbles	small	axial			Thin flakes						x											x		x	Mackay et al. 2015	Bipolar knapping is less represented than other methods; pièces esquillées considered as retouched artifacts
111	Mumba Rockshelter Bed V	Africa	Tanzania (Northern region)	LP - Late MSA/ Early LSA - 65-45 ka	Minerals	Hyaline, polycrystaline and smoky quartz (mostly), orthogneiss, metarhyolite, microgabbro	Thick tabular nodules	nd	axial			Thick flakes		x											x						x	Diez-Martin et al. 2009b; Bushozi et al. 2020	bipolar cores tend to be cubic and thick; bipolar knapping is most frequent in upper level (54%) rather than middle and lower levels (45%); many bipolar flakes used for scrapers and backed pieces (by bipolar retouch); lower quality rocks related to bipolar exploitation; best quality rocks exploited by freehand percussion
112	Border Cave - layers 2BS LR-1BS LR	Africa	South Africa (KwaZulu-Natal)	LP - Final MSA/Early LSA - 49-42 ka	Minerals	Chalcedony, Milky Quartz, Crystal Quartz, Rhyolite	Pebbles	small	nd			Flakes	x											x					x		x	Villa et al. 2012	Great increasing of bipolar knapping in the Early Late Stone Age units
113	Kisese II rockshelter	Africa	Tanzania	LP - MSA/LSA - 45-4 ka	Minerals	Crystalline quartz (mostly), lava, chert, obsidian	Vein, stream pebbles	nd	nd			Flakes	x							x									x		x	Tryon et al. 2018
114	Loiyangalani	Africa	Tanzania (Serengeti)	LP - Late MSA	Minerals	Quartz (mostly), quartzite, chert, obsidian	Cobbles, flakes	nd	nd			Thin flakes								x												Maìllo-Fernandez et al. 2019	12,6% of industry is made by bipolar knapping; bipolar knapping link with quartz exploitation; very low frequence of retouched pieces
115	Sibudu	Africa	South Africa (KwaZulu-Natal)	LP - MSA - Howiesons Poort	Minerals	Quartz (mostly), quartzite (important); dolerite and hornfels (occasionally)	nd	nd	nd			Flakes	x					x						x			x		x		x	De la Pena and Wadley 2014, 2017; Langejans 2012
116	Gotera - GOT-10	Africa	Ethiopia	LP - MSA - MIS 3	Minerals	Quartz, basalt	Blocks (quartz), residual cores (basalt)	small	nd			Flakes	x					x									x				x	Fusco and Spinapolice 2022
117	Siphiso Shelter and Sibebe Shelter	Africa	Swaziland	LP - MSA/LSA	Minerals	Quartz and chalcedony	Pebbles and cobbles	nd	axial			Elongated products					x						x								x	Barham 1987	microliths
118	Sehonghong - Layers RFS-BARF	Africa	Lesotho	LP - Late Pleistocene - 35-12 ka	Minerals	Chalcedony, Agate, Crystal quartz, Chert	Nodules, crystal (quartz)	small (at least quartz)	axial			Thin flakes						x						x								Pargeter et al. 2017	increased levels of bipolar reduction (and quartz) at times when Sehonghong was only ephemerally occupied, and decreased frequencies at times when occupation density increased
119	Putslaagte 8 layers C19-8	Africa	South Africa	LP - Early LSA/ Robberg/ Early Holocene - 25- <17 ka	Metamorphics	Hornfels, Quartzite, Silcrete, Quartz	Cobbles and pebbles	small	axial			Thin flakes						x											x			Mackay et al. 2015	Great increase of the bipolar knapping weight compared to lower levels; pièces esquillées considered as retouched artifacts
120	Eland Bay Cave - MOS1	Africa	South Africa	LP - LSA - Robberg - 14605-14278 cal BP	Minerals	Quartz (mostly), silcrete	nd	nd	axial and tangential		x	Elongated products							x	x	x			x		x	x		x		x	Porraz et al. 2016	small bladelets used as microliths
121	Bizhat Ruhama	Western Asia	Israel	EP - Olduwan - 1.6-1.2 Ma	Cherts	Chert	Pebbles, thick flakes	small	axial			Thin flakes						x									x					Zaidner 2013	Bipolar knapping intesively used at Bizat Ruhama
122	Xiaochangliang	Eastern Asia	China (Nihewan Basin)	EP - Lower Paleolithic	Cherts	Chert, basalt, quartz	nd	nd	nd			Elongated products							x													Yang et al. 2016
123	Dursunlu	Western Asia	Turkey (Anatolia)	EP/MP - Early to Middle Pleistocene	Volcanics	Obsidian, rhyolite, basalt, andesite	Tabular andesite	small	axial	x		Thin flakes	x					x											x		x	Slimak et al. 2008; Gulec et al. 2009
124	Fengshudao	Eastern Asia	China	EP/MP - Early to Middle Pleistocene - 803 ka	Sedimentary	Quartz, Quartzite, Sandstone, Lava and chert	River cobbles	small and large	axial	x		Thin flakes	x					x													x	Wang et al. 2014
125	Chou-Kou-Tien/Zhoukoudian	Eastern Asia	China	MP - Lower Palaeolithic	Minerals	Quartz	nd	nd	nd			Flakes	x														x				x	Breuil 1932; Li 2016	partially retouched; expedient strategy of freehand reduction
126	Toka	Southern Asia	India	MP/LP - Middle to Late Pleistocene	Metamorphics	Quartzite	Pebbles	small	axial	x		Flakes	x					x													x	Chauhan 2007
127	Mugharet el-Zuttiyeh	Western Asia	Israel	MP/LP - ∼260–106 ka	Cherts	Flint	Pebbles	small	axial	x		Elongated products	x	x					x												x	Malinsky-Buller 2016
128	Liang Bua	Southern Asia	Indonesia (Flores Island)	LP - 95–17 ka	Volcanics	Silicified tuff, Chert	Cobbles and pebbles	small and large	axial	x		Flakes	x	x														x	x		x	Moore et al. 2009
129	JWP 20, 21, 23	Southern Asia	India (Jerreru River Valley)	LP - 77-34 ka	Sedimentary	Limestone, chert, quartzite, dolerite, chalcedony, crystal quartz (crystal quartz only at JWP 23)	nd	nd	nd			Thin flakes						x						x			x				x	Clarkson et al. 2012; Wedage et al. 2019	Bipolar knapping poorly represented (JWP 20: 1%/ JWP 21: 3%/ JWP 23: 0,5%); the objective of the bipolar knapping, beyond the residual exploitation, is not clear ( nd -small flakes?); technique perhaps to be related also to the few micro-bladelets
130	Mughr el-Hamamah	Western Asia	Jordan	LP - Early Upper Palaeolithic - 45-39 ka	Cherts	Flint	Flakes	small	axial			Thin flakes						x											x			Stutz et al. 2015
131	Üçağızlı	Western Asia	Turkey	LP - 42–29 ka	Cherts	Flint, Quartzite, Limestone, Diorite	Pebbles	small and large	axial	x		Elongated products	x						x									x	x		x	Kuhn et al. 2009
132	Batadomba-lena	Southern Asia	Sri Lanka	LP - ∼36-20 ka cal BP	Minerals	Quartz, Chert, Gneiss	Pebbles	small	tangential and axial	x	x	Thin flakes						x						x							x	Lewis et al. 2014; Perera et al. 2011
133	Shuidonggou locality 7	Eastern Asia	China	LP - Initial Upper Paleolithic - 30-23 ka	Cherts	Chert (good quality)	pebbles	small	axial			Thin flakes						x														Niu et al. 2016	Bipolar knapping used on a small-scale (maybe underrepresented)
134	Several sites	Southern Asia	India	LP - Upper Paleolithic	Cherts	Chert, Quartzite, Chalcedony	Pebbles	small and large	axial		x	Elongated products	x	x					x										x		x	Jones and Pal 2009
135	Huayang site	Eastern Asia	China (Northeast, Lesser Khingan Mountains)	LP - 14 ka	Minerals	Agate (rare)	nd	nd	nd			Thin flakes						x										x			x	Yue et al. 2020	technique used to exploit a very little represented raw material
136	Fa-Hien Lena Cave	Southern Asia	Sri Lanka	LP/H - 48-4 ka	Minerals	Quartz - crystal (mostly), milky, rose, vein and grainy	Pebbles	small	axial			Thin flakes	x					x		x	x							x			x	Wedage et al. 2019	use of small flakes for microliths production; small number of bladelets; relation between the (best) quality of raw material and the exploitation degree
137	Jwalapuram 9 rockshekter	Southern Asia	India	LP/H - 35 ka-Holocene	Sedimentary	Chert, chalcedony, cristal quartz, silicified limestone	Nodules	nd	nd			Elongated products												x			x				x	Clarkson et al. 2009, 2012; Wedage et al. 2019	very little information on the bipolar knapping; bipolar knapping very poorly represented (1% phase C; 0,2% phase D)
138	Kültepe I	Western Asia	Azerbaijan	H - Neolithic-Chalcolithic transition	Volcanics	Obsidian	Pebbles	small	axial	x		Flakes	x	x														x	x		x	Marro et al. 2019
139	Bone Cave	Near Oceania	Australia (Tasmania)	LP - 29-post 18 k	Minerals	Quartz, Chert, Silcrete, Quartzite	Pebbles	small	axial	x		Thin flakes	x					x		x											x	Cosgrove 1999
140	Jerimalai	Near Oceania	East Timor	LP/H - 42-2 ka BP	Cherts	Chert, silcrete, volcanic rocks, quartzite, quartz	Pebbles	small	nd	x		Thin flakes	x					x													x	Marwick et al. 2016
141	Kun-Kundurnku	Near Oceania	Australia-South (Alligator River floodplain, Western Arnhem Land)	H - Holocene	Minerals	Quartz (mostly), exogenous tuff, quartzite (high quality)	nd	nd	nd			Flakes	x														x				x	Hiscock 2015
142	Henry Lawson Drive Rockshelter	Near Oceania	Australia (Sidney)	H - 1 ka	Cherts	Silcrete and chert (mostly)	nd	nd	axial			Flakes	x														x				x	Hiscock 2003, 2015	almost a part of bipolar flakes are used for produce small scrapers and backed tools
143	Panga ya Saidi - layers 1-19	Africa	Kenya	LP/H - MSA/LSA - ∼78-post 8ka	Quartz	Quartz, Chert, Limestone	nd	nd	axial			Flakes	x					x	x	x				x							x	Shipton et al. 2018	Bipolar knapping is attested in all layers of the site. Low frequencies of bipolar knapping are attested in layers 19-17 and 10. Starting from layers 16-11(67-48.5 ka) we can see an abrupt increase of bipolar knapping in parallel to many Early LSA sites.
144	Xiamabei layer 6	Eastern Asia	Northern China	LP - 40 ka	Cherts	Chert, Quartz, Phonolite	Small nodules (chert), pebbles (quartz)	small	axial			Elongated products	x					x	x					x							x	Wang et al. 2022	bipolar percussion is the predominant reduction technique, contributing to 70.11% of the identifiable specimens; bipolar percussion reduction strategies therefore resulted in the efficient production of bladelet-like blanks that could be used as tools, with lengths frequently measuring 20 mm or less
